# Supplementary material
Source: publisher figshare collection journal article supplement (https://frontiersin.figshare.com/ndownloader/files/27997407)
Supplement: Supplementary file 1 [file 27997407]

## Sheet: README
DESeq2 differential abundance analysis results of ASVs in nodules from the eastern vs. western CCZ sites and between different benthic habitat types. Only ASVs with a log2-fold difference between sites of >1.585 (i.e., a 3-fold difference) and a false discovery rate-adjusted p value < 0.05 are reported here. Results are reported in raw Silva v138 taxonomy format (the phylum referred to as Thaumar…

## Sheet: nodules, east vs west CCZ
Enriched in nodules from eastern CCZ
	baseMean	log2FoldChange	lfcSE	stat	pvalue	padj	Kingdom	Phylum	Class	Order	Family	Genus	Species
ASV_98	48.2665	1.63827	0.473399	3.46065	0.000538873	0.00506064	Archaea	Crenarchaeota	Nitrososphaeria	Nitrosopumilales	Nitrosopumilaceae	Candidatus_Nitrosopumilus	NA
ASV_706	17.8687	1.98607	0.474444	4.1861	2.83787e-05	0.000432892	Archaea	Crenarchaeota	Nitrososphaeria	Nitrosopumilales	Nitrosopumilaceae	Candidatus_Nitrosopumilus	NA
ASV_2009	11.0631	2.28013	0.469874	4.85264	1.21827e-06	2.66955e-05	Archaea	Crenarchaeota	Nitrososphaeria	Nitrosopumilales	Nitrosopumilaceae	Candidatus_Nitrosopumilus	NA
ASV_558	2.4072	2.28261	0.841811	2.71155	0.00669704	0.0357651	Archaea	Crenarchaeota	Nitrososphaeria	Nitrosopumilales	Nitrosopumilaceae	Candidatus_Nitrosopumilus	NA
ASV_771	10.469	2.42144	0.783982	3.08864	0.00201077	0.0146483	Archaea	Crenarchaeota	Nitrososphaeria	Nitrosopumilales	Nitrosopumilaceae	Candidatus_Nitrosopumilus	NA
ASV_532	20.014	2.53282	0.478464	5.29365	1.19897e-07	3.27759e-06	Archaea	Crenarchaeota	Nitrososphaeria	Nitrosopumilales	Nitrosopumilaceae	Candidatus_Nitrosopumilus	NA
ASV_38	91.8683	2.5453	0.465825	5.46407	4.65351e-08	1.44363e-06	Archaea	Crenarchaeota	Nitrososphaeria	Nitrosopumilales	Nitrosopumilaceae	Candidatus_Nitrosopumilus	NA
ASV_7695	1.34751	2.78962	0.955806	2.91861	0.00351596	0.0216204	Archaea	Crenarchaeota	Nitrososphaeria	Nitrosopumilales	Nitrosopumilaceae	Candidatus_Nitrosopumilus	NA
ASV_5010	1.35256	2.8056	1.0084	2.78223	0.00539874	0.0302966	Archaea	Crenarchaeota	Nitrososphaeria	Nitrosopumilales	Nitrosopumilaceae	Candidatus_Nitrosopumilus	NA
ASV_1076	14.1497	2.84594	0.64199	4.433	9.29313e-06	0.000165538	Archaea	Crenarchaeota	Nitrososphaeria	Nitrosopumilales	Nitrosopumilaceae	Candidatus_Nitrosopumilus	NA
ASV_1770	3.57175	2.98592	0.817975	3.65039	0.000261847	0.00278061	Archaea	Crenarchaeota	Nitrososphaeria	Nitrosopumilales	Nitrosopumilaceae	Candidatus_Nitrosopumilus	NA
ASV_338	50.4276	3.00537	0.474105	6.33904	2.31198e-10	1.30273e-08	Archaea	Crenarchaeota	Nitrososphaeria	Nitrosopumilales	Nitrosopumilaceae	Candidatus_Nitrosopumilus	NA
ASV_2039	12.668	3.01894	0.687831	4.38907	1.13838e-05	0.000194016	Archaea	Crenarchaeota	Nitrososphaeria	Nitrosopumilales	Nitrosopumilaceae	Candidatus_Nitrosopumilus	NA
ASV_1592	7.75679	3.29763	1.01846	3.23785	0.00120434	0.00950054	Archaea	Crenarchaeota	Nitrososphaeria	Nitrosopumilales	Nitrosopumilaceae	Candidatus_Nitrosopumilus	NA
ASV_8886	1.29328	3.32372	1.28015	2.59636	0.00942169	0.0452405	Archaea	Crenarchaeota	Nitrososphaeria	Nitrosopumilales	Nitrosopumilaceae	Candidatus_Nitrosopumilus	NA
ASV_9371	1.18346	3.43262	1.22786	2.79562	0.00518001	0.0291283	Archaea	Crenarchaeota	Nitrososphaeria	Nitrosopumilales	Nitrosopumilaceae	Candidatus_Nitrosopumilus	NA
ASV_3243	3.18607	3.56511	1.23056	2.89716	0.00376563	0.0228503	Archaea	Crenarchaeota	Nitrososphaeria	Nitrosopumilales	Nitrosopumilaceae	Candidatus_Nitrosopumilus	NA
ASV_464	36.9401	3.59119	0.533841	6.72707	1.73117e-11	1.22558e-09	Archaea	Crenarchaeota	Nitrososphaeria	Nitrosopumilales	Nitrosopumilaceae	Candidatus_Nitrosopumilus	NA
ASV_8065	1.99313	4.19116	1.39041	3.01433	0.0025755	0.0173016	Archaea	Crenarchaeota	Nitrososphaeria	Nitrosopumilales	Nitrosopumilaceae	Candidatus_Nitrosopumilus	NA
ASV_6445	1.93412	4.29001	1.60138	2.67894	0.0073856	0.0381866	Archaea	Crenarchaeota	Nitrososphaeria	Nitrosopumilales	Nitrosopumilaceae	Candidatus_Nitrosopumilus	NA
ASV_2830	2.27309	4.54497	1.37178	3.31318	0.000922403	0.00764791	Archaea	Crenarchaeota	Nitrososphaeria	Nitrosopumilales	Nitrosopumilaceae	Candidatus_Nitrosopumilus	NA
ASV_2091	2.46122	4.66197	1.45912	3.19505	0.00139804	0.010663	Archaea	Crenarchaeota	Nitrososphaeria	Nitrosopumilales	Nitrosopumilaceae	Candidatus_Nitrosopumilus	NA
ASV_5362	2.75921	4.6624	1.80589	2.58177	0.0098295	0.0464319	Archaea	Crenarchaeota	Nitrososphaeria	Nitrosopumilales	Nitrosopumilaceae	Candidatus_Nitrosopumilus	NA
ASV_2293	2.67434	4.78068	0.923932	5.17428	2.28792e-07	6.07398e-06	Archaea	Crenarchaeota	Nitrososphaeria	Nitrosopumilales	Nitrosopumilaceae	Candidatus_Nitrosopumilus	NA
ASV_846	16.9418	4.84579	1.015	4.77418	1.8044e-06	3.83227e-05	Archaea	Crenarchaeota	Nitrososphaeria	Nitrosopumilales	Nitrosopumilaceae	Candidatus_Nitrosopumilus	NA
ASV_3964	3.0436	4.97534	1.34015	3.71252	0.000205208	0.0022846	Archaea	Crenarchaeota	Nitrososphaeria	Nitrosopumilales	Nitrosopumilaceae	Candidatus_Nitrosopumilus	NA
ASV_2169	13.4786	5.01496	0.698528	7.17933	7.00534e-13	7.16361e-11	Archaea	Crenarchaeota	Nitrososphaeria	Nitrosopumilales	Nitrosopumilaceae	Candidatus_Nitrosopumilus	NA
ASV_404	30.7796	5.02765	0.89273	5.63178	1.78363e-08	6.3956e-07	Archaea	Crenarchaeota	Nitrososphaeria	Nitrosopumilales	Nitrosopumilaceae	Candidatus_Nitrosopumilus	NA
ASV_1992	5.87084	5.13554	1.719	2.98751	0.00281256	0.0185333	Archaea	Crenarchaeota	Nitrososphaeria	Nitrosopumilales	Nitrosopumilaceae	Candidatus_Nitrosopumilus	NA
ASV_968	25.6718	5.47767	0.850323	6.44187	1.18009e-10	7.08311e-09	Archaea	Crenarchaeota	Nitrososphaeria	Nitrosopumilales	Nitrosopumilaceae	Candidatus_Nitrosopumilus	NA
ASV_2555	6.68319	6.0982	1.02204	5.96668	2.42136e-09	9.97815e-08	Archaea	Crenarchaeota	Nitrososphaeria	Nitrosopumilales	Nitrosopumilaceae	Candidatus_Nitrosopumilus	NA
ASV_803	6.79738	6.13127	0.860254	7.12728	1.02371e-12	9.74639e-11	Archaea	Crenarchaeota	Nitrososphaeria	Nitrosopumilales	Nitrosopumilaceae	Candidatus_Nitrosopumilus	NA
ASV_1300	15.7152	7.33446	1.1179	6.56093	5.34732e-11	3.43347e-09	Archaea	Crenarchaeota	Nitrososphaeria	Nitrosopumilales	Nitrosopumilaceae	Candidatus_Nitrosopumilus	NA
ASV_201	68.5744	7.39774	0.742903	9.95788	2.32974e-23	9.18915e-21	Archaea	Crenarchaeota	Nitrososphaeria	Nitrosopumilales	Nitrosopumilaceae	Candidatus_Nitrosopumilus	NA
ASV_75	86.3118	1.70185	0.305901	5.56339	2.64585e-08	8.91061e-07	Archaea	Crenarchaeota	Nitrososphaeria	Nitrosopumilales	Nitrosopumilaceae	NA	NA
ASV_209	24.6367	2.08052	0.602098	3.45545	0.000549369	0.00512435	Archaea	Crenarchaeota	Nitrososphaeria	Nitrosopumilales	Nitrosopumilaceae	NA	NA
ASV_7509	1.61359	2.36639	0.906803	2.6096	0.00906481	0.044141	Archaea	Crenarchaeota	Nitrososphaeria	Nitrosopumilales	Nitrosopumilaceae	NA	NA
ASV_58	117.942	2.62859	0.479597	5.48084	4.2332e-08	1.34343e-06	Archaea	Crenarchaeota	Nitrososphaeria	Nitrosopumilales	Nitrosopumilaceae	NA	NA
ASV_550	15.5782	3.09507	0.800462	3.8666	0.000110362	0.00133645	Archaea	Crenarchaeota	Nitrososphaeria	Nitrosopumilales	Nitrosopumilaceae	NA	NA
ASV_3810	5.91416	3.15945	0.969175	3.25993	0.00111438	0.00886688	Archaea	Crenarchaeota	Nitrososphaeria	Nitrosopumilales	Nitrosopumilaceae	NA	NA
ASV_6804	1.22313	3.50499	0.996763	3.51637	0.000437486	0.00422342	Archaea	Crenarchaeota	Nitrososphaeria	Nitrosopumilales	Nitrosopumilaceae	NA	NA
ASV_1442	6.23183	3.53186	0.890719	3.96518	7.33394e-05	0.000941814	Archaea	Crenarchaeota	Nitrososphaeria	Nitrosopumilales	Nitrosopumilaceae	NA	NA
ASV_1552	3.66875	3.60858	1.31853	2.73683	0.00620345	0.0337076	Archaea	Crenarchaeota	Nitrososphaeria	Nitrosopumilales	Nitrosopumilaceae	NA	NA
ASV_1477	1.56829	4.0031	1.52128	2.6314	0.00850335	0.0422262	Archaea	Crenarchaeota	Nitrososphaeria	Nitrosopumilales	Nitrosopumilaceae	NA	NA
ASV_1754	5.77557	4.12977	1.23548	3.34266	0.000829803	0.00700638	Archaea	Crenarchaeota	Nitrososphaeria	Nitrosopumilales	Nitrosopumilaceae	NA	NA
ASV_1294	1.74343	4.15777	1.36905	3.03697	0.00238972	0.016413	Archaea	Crenarchaeota	Nitrososphaeria	Nitrosopumilales	Nitrosopumilaceae	NA	NA
ASV_829	40.7924	4.42703	0.740693	5.97687	2.27462e-09	9.51548e-08	Archaea	Crenarchaeota	Nitrososphaeria	Nitrosopumilales	Nitrosopumilaceae	NA	NA
ASV_569	20.6481	4.48871	0.769944	5.82992	5.5454e-09	2.12651e-07	Archaea	Crenarchaeota	Nitrososphaeria	Nitrosopumilales	Nitrosopumilaceae	NA	NA
ASV_1678	10.2886	4.5826	1.57557	2.90854	0.00363126	0.0222304	Archaea	Crenarchaeota	Nitrososphaeria	Nitrosopumilales	Nitrosopumilaceae	NA	NA
ASV_1559	3.30921	4.59731	1.13318	4.05699	4.9709e-05	0.000682819	Archaea	Crenarchaeota	Nitrososphaeria	Nitrosopumilales	Nitrosopumilaceae	NA	NA
ASV_1745	2.5751	4.72862	1.47837	3.19853	0.00138129	0.0105644	Archaea	Crenarchaeota	Nitrososphaeria	Nitrosopumilales	Nitrosopumilaceae	NA	NA
ASV_1342	3.21702	4.73094	1.72407	2.74405	0.00606858	0.0331134	Archaea	Crenarchaeota	Nitrososphaeria	Nitrosopumilales	Nitrosopumilaceae	NA	NA
ASV_292	17.856	4.73273	0.673704	7.02494	2.14153e-12	1.73905e-10	Archaea	Crenarchaeota	Nitrososphaeria	Nitrosopumilales	Nitrosopumilaceae	NA	NA
ASV_289	4.38112	4.86091	1.06632	4.55858	5.15e-06	0.000100845	Archaea	Crenarchaeota	Nitrososphaeria	Nitrosopumilales	Nitrosopumilaceae	NA	NA
ASV_2737	9.86134	5.15439	0.825957	6.24051	4.36157e-10	2.18951e-08	Archaea	Crenarchaeota	Nitrososphaeria	Nitrosopumilales	Nitrosopumilaceae	NA	NA
ASV_879	3.95815	5.34242	1.62151	3.29472	0.00098519	0.00797686	Archaea	Crenarchaeota	Nitrososphaeria	Nitrosopumilales	Nitrosopumilaceae	NA	NA
ASV_4909	3.97628	5.34965	1.46107	3.66147	0.000250777	0.0026837	Archaea	Crenarchaeota	Nitrososphaeria	Nitrosopumilales	Nitrosopumilaceae	NA	NA
ASV_163	30.8372	5.41748	0.872192	6.21134	5.25343e-10	2.54469e-08	Archaea	Crenarchaeota	Nitrososphaeria	Nitrosopumilales	Nitrosopumilaceae	NA	NA
ASV_4747	4.47129	5.52388	1.95823	2.82086	0.00478957	0.0274927	Archaea	Crenarchaeota	Nitrososphaeria	Nitrosopumilales	Nitrosopumilaceae	NA	NA
ASV_5132	4.55844	5.54859	1.39803	3.96887	7.2213e-05	0.000931683	Archaea	Crenarchaeota	Nitrososphaeria	Nitrosopumilales	Nitrosopumilaceae	NA	NA
ASV_1675	4.65852	5.57985	1.83893	3.03429	0.00241099	0.0165179	Archaea	Crenarchaeota	Nitrososphaeria	Nitrosopumilales	Nitrosopumilaceae	NA	NA
ASV_242	7.98691	5.58535	0.817	6.83641	8.12015e-12	6.05939e-10	Archaea	Crenarchaeota	Nitrososphaeria	Nitrosopumilales	Nitrosopumilaceae	NA	NA
ASV_1455	5.59737	5.68905	0.994954	5.7179	1.07846e-08	4.02381e-07	Archaea	Crenarchaeota	Nitrososphaeria	Nitrosopumilales	Nitrosopumilaceae	NA	NA
ASV_4074	5.01372	5.68996	1.29248	4.40237	1.07074e-05	0.000187109	Archaea	Crenarchaeota	Nitrososphaeria	Nitrosopumilales	Nitrosopumilaceae	NA	NA
ASV_3575	5.65109	5.85705	1.68976	3.4662	0.00052787	0.00497422	Archaea	Crenarchaeota	Nitrososphaeria	Nitrosopumilales	Nitrosopumilaceae	NA	NA
ASV_5514	5.67951	5.86056	1.52109	3.85288	0.000116737	0.00138928	Archaea	Crenarchaeota	Nitrososphaeria	Nitrosopumilales	Nitrosopumilaceae	NA	NA
ASV_3693	6.90231	6.14713	0.825563	7.44598	9.62254e-14	1.26514e-11	Archaea	Crenarchaeota	Nitrososphaeria	Nitrosopumilales	Nitrosopumilaceae	NA	NA
ASV_456	10.0568	6.22969	0.87574	7.11363	1.13033e-12	1.00736e-10	Archaea	Crenarchaeota	Nitrososphaeria	Nitrosopumilales	Nitrosopumilaceae	NA	NA
ASV_3475	7.50305	6.26882	1.1221	5.58667	2.3146e-08	8.08937e-07	Archaea	Crenarchaeota	Nitrososphaeria	Nitrosopumilales	Nitrosopumilaceae	NA	NA
ASV_376	9.3555	6.27576	0.900226	6.97131	3.14003e-12	2.40823e-10	Archaea	Crenarchaeota	Nitrososphaeria	Nitrosopumilales	Nitrosopumilaceae	NA	NA
ASV_1920	7.53036	6.27645	1.21392	5.17039	2.33606e-07	6.14273e-06	Archaea	Crenarchaeota	Nitrososphaeria	Nitrosopumilales	Nitrosopumilaceae	NA	NA
ASV_2448	7.59766	6.28647	2.20287	2.85376	0.00432047	0.0253805	Archaea	Crenarchaeota	Nitrososphaeria	Nitrosopumilales	Nitrosopumilaceae	NA	NA
ASV_2316	8.75936	6.49514	1.17119	5.54576	2.92672e-08	9.61986e-07	Archaea	Crenarchaeota	Nitrososphaeria	Nitrosopumilales	Nitrosopumilaceae	NA	NA
ASV_2562	10.3666	6.73566	0.889678	7.5709	3.70661e-14	5.38628e-12	Archaea	Crenarchaeota	Nitrososphaeria	Nitrosopumilales	Nitrosopumilaceae	NA	NA
ASV_2664	13.0313	7.0635	1.12426	6.28282	3.32484e-10	1.73206e-08	Archaea	Crenarchaeota	Nitrososphaeria	Nitrosopumilales	Nitrosopumilaceae	NA	NA
ASV_3171	3.65285	5.23008	1.72422	3.0333	0.00241895	0.0165315	Bacteria	Acidobacteriota	Acidobacteriae	Subgroup_13	NA	NA	NA
ASV_4214	5.57258	5.83759	0.965899	6.04369	1.50631e-09	6.39834e-08	Bacteria	Acidobacteriota	Acidobacteriae	Subgroup_15	NA	NA	NA
ASV_1145	15.6954	3.49766	0.629314	5.55789	2.73061e-08	9.08338e-07	Bacteria	Acidobacteriota	Subgroup_21	NA	NA	NA	NA
ASV_625	1.9424	4.14554	1.4183	2.92289	0.00346796	0.0214207	Bacteria	Acidobacteriota	Subgroup_21	NA	NA	NA	NA
ASV_1698	2.10682	4.43886	1.45201	3.05705	0.00223526	0.015784	Bacteria	Acidobacteriota	Subgroup_21	NA	NA	NA	NA
ASV_1151	2.30402	4.56264	1.58238	2.8834	0.0039341	0.0237163	Bacteria	Acidobacteriota	Subgroup_21	NA	NA	NA	NA
ASV_1889	4.50873	5.53277	1.30572	4.23733	2.2619e-05	0.000358914	Bacteria	Acidobacteriota	Subgroup_21	NA	NA	NA	NA
ASV_986	8.00604	6.3609	0.846933	7.51052	5.8893e-14	8.13019e-12	Bacteria	Acidobacteriota	Subgroup_21	NA	NA	NA	NA
ASV_2525	3.54201	4.38304	1.59164	2.75379	0.00589098	0.0323555	Bacteria	Acidobacteriota	Subgroup_22	NA	NA	NA	NA
ASV_2388	2.46342	3.65385	1.24283	2.93995	0.00328266	0.0206456	Bacteria	Acidobacteriota	Subgroup_26	NA	NA	NA	NA
ASV_5617	1.05937	3.45306	1.02439	3.37086	0.000749339	0.00642524	Bacteria	Acidobacteriota	Subgroup_5	NA	NA	NA	NA
ASV_908	12.6837	1.8897	0.549257	3.44047	0.0005807	0.00536367	Bacteria	Acidobacteriota	Thermoanaerobaculia	Thermoanaerobaculales	Thermoanaerobaculaceae	Subgroup_10	NA
ASV_7298	2.89367	4.88773	1.51469	3.22687	0.0012515	0.00978867	Bacteria	Acidobacteriota	Thermoanaerobaculia	Thermoanaerobaculales	Thermoanaerobaculaceae	Subgroup_10	NA
ASV_3850	3.28977	5.08306	1.15647	4.39533	1.10606e-05	0.000189679	Bacteria	Acidobacteriota	Thermoanaerobaculia	Thermoanaerobaculales	Thermoanaerobaculaceae	Subgroup_10	NA
ASV_4278	5.79042	5.88804	1.68317	3.49818	0.000468442	0.00447532	Bacteria	Acidobacteriota	Thermoanaerobaculia	Thermoanaerobaculales	Thermoanaerobaculaceae	Subgroup_10	NA
ASV_2182	8.65863	6.32082	1.4442	4.37669	1.20494e-05	0.000202856	Bacteria	Acidobacteriota	Thermoanaerobaculia	Thermoanaerobaculales	Thermoanaerobaculaceae	Subgroup_10	NA
ASV_975	9.71356	1.76578	0.605478	2.91635	0.00354156	0.0217294	Bacteria	Acidobacteriota	Vicinamibacteria	Subgroup_17	NA	NA	NA
ASV_1607	11.1147	3.06565	0.847032	3.61928	0.000295425	0.00306642	Bacteria	Acidobacteriota	Vicinamibacteria	Subgroup_17	NA	NA	NA
ASV_2303	2.82378	3.654	1.13532	3.21847	0.00128877	0.00993935	Bacteria	Acidobacteriota	Vicinamibacteria	Subgroup_17	NA	NA	NA
ASV_222	86.2543	1.89931	0.373077	5.09093	3.56308e-07	8.86277e-06	Bacteria	Acidobacteriota	Vicinamibacteria	Subgroup_9	NA	NA	NA
ASV_819	5.05831	3.33774	0.92066	3.62538	0.000288534	0.00301758	Bacteria	Acidobacteriota	Vicinamibacteria	Subgroup_9	NA	NA	NA
ASV_4048	5.1536	4.43738	1.37228	3.23359	0.00122246	0.00961596	Bacteria	Acidobacteriota	Vicinamibacteria	Subgroup_9	NA	NA	NA
ASV_2058	3.06267	4.97508	1.62906	3.05397	0.00225836	0.015866	Bacteria	Acidobacteriota	Vicinamibacteria	Subgroup_9	NA	NA	NA
ASV_3455	5.72551	5.25544	1.09752	4.78845	1.68072e-06	3.59727e-05	Bacteria	Acidobacteriota	Vicinamibacteria	Subgroup_9	NA	NA	NA
ASV_191	45.2137	6.32407	0.779742	8.11047	5.04229e-16	9.28118e-14	Bacteria	Acidobacteriota	Vicinamibacteria	Subgroup_9	NA	NA	NA
ASV_1268	17.3961	7.48458	0.833425	8.98052	2.69493e-19	5.72362e-17	Bacteria	Acidobacteriota	Vicinamibacteria	Subgroup_9	NA	NA	NA
ASV_2445	1.84746	4.08452	1.31277	3.11137	0.00186222	0.0136744	Bacteria	Acidobacteriota	Vicinamibacteria	Vicinamibacterales	NA	NA	NA
ASV_1677	2.49901	3.52453	1.19131	2.95854	0.00309101	0.0197133	Bacteria	Acidobacteriota	Vicinamibacteria	Vicinamibacterales	Vicinamibacteraceae	NA	NA
ASV_4336	6.61851	6.08754	2.30619	2.63965	0.00829921	0.041662	Bacteria	Actinobacteriota	Acidimicrobiia	Actinomarinales	NA	NA	NA
ASV_6467	3.45663	4.18315	1.51916	2.75359	0.00589453	0.0323555	Bacteria	Actinobacteriota	Acidimicrobiia	Microtrichales	Microtrichaceae	Sva0996_marine_group	NA
ASV_6646	2.97698	4.93419	1.59635	3.09092	0.00199541	0.0145749	Bacteria	Bacteroidota	Bacteroidia	Chitinophagales	Saprospiraceae	NA	NA
ASV_5607	4.74441	4.97327	1.45972	3.40701	0.000656782	0.00580731	Bacteria	Bacteroidota	Bacteroidia	Chitinophagales	Saprospiraceae	Portibacter	NA
ASV_2456	12.8873	3.11551	0.923587	3.37327	0.000742817	0.00638915	Bacteria	Bacteroidota	Bacteroidia	Cytophagales	Cyclobacteriaceae	Ekhidna	NA
ASV_5212	2.19243	3.8573	1.12147	3.43949	0.00058281	0.00536367	Bacteria	Bacteroidota	Bacteroidia	Cytophagales	Cyclobacteriaceae	Ekhidna	NA
ASV_153	66.4613	3.55962	0.56632	6.28553	3.2674e-10	1.73206e-08	Bacteria	Bacteroidota	Bacteroidia	Cytophagales	Cyclobacteriaceae	NA	NA
ASV_4147	6.17615	5.98888	1.58688	3.77399	0.000160655	0.00185593	Bacteria	Bacteroidota	Bacteroidia	Cytophagales	Cyclobacteriaceae	NA	NA
ASV_1137	34.8232	7.22515	1.23293	5.86012	4.62522e-09	1.82432e-07	Bacteria	Bacteroidota	Bacteroidia	Cytophagales	Cyclobacteriaceae	NA	NA
ASV_3020	3.28649	5.07934	1.95246	2.60151	0.00928137	0.0448789	Bacteria	Bacteroidota	Bacteroidia	Cytophagales	NA	NA	NA
ASV_824	40.6268	8.70626	1.34978	6.45012	1.11762e-10	6.85724e-09	Bacteria	Bacteroidota	Bacteroidia	Flavobacteriales	Flavobacteriaceae	NA	NA
ASV_1573	27.7095	23.9898	1.75487	13.6704	1.52509e-42	4.21077e-39	Bacteria	Bacteroidota	Bacteroidia	Flavobacteriales	Flavobacteriaceae	NA	NA
ASV_871	8.15958	3.52474	1.28923	2.73399	0.00625713	0.0338744	Bacteria	Bacteroidota	Rhodothermia	Rhodothermales	Rhodothermaceae	NA	NA
ASV_1369	8.50058	3.57089	1.21021	2.95065	0.0031711	0.0200674	Bacteria	Bacteroidota	Rhodothermia	Rhodothermales	Rhodothermaceae	NA	NA
ASV_3853	4.23687	5.12802	1.25719	4.07897	4.52351e-05	0.000640483	Bacteria	Calditrichota	Calditrichia	Calditrichales	Calditrichaceae	Calorithrix	NA
ASV_7846	2.15181	4.46913	1.66383	2.68605	0.00723025	0.0376655	Bacteria	Calditrichota	Calditrichia	Calditrichales	Calditrichaceae	JdFR-76	NA
ASV_5626	3.78613	5.28301	1.96233	2.69221	0.00709792	0.0373995	Bacteria	Calditrichota	Calditrichia	Calditrichales	Calditrichaceae	JdFR-76	NA
ASV_1285	16.8243	3.42794	1.11496	3.07448	0.00210869	0.0151442	Bacteria	Chloroflexi	Dehalococcoidia	S085	NA	NA	NA
ASV_2147	7.90379	3.4282	0.731808	4.68456	2.80556e-06	5.78071e-05	Bacteria	Chloroflexi	Dehalococcoidia	S085	NA	NA	NA
ASV_1396	4.46676	1.90378	0.690271	2.75802	0.00581518	0.0320473	Bacteria	Chloroflexi	Dehalococcoidia	SAR202_clade	NA	NA	NA
ASV_2935	6.70834	2.51664	0.939338	2.67917	0.00738056	0.0381866	Bacteria	Chloroflexi	Dehalococcoidia	SAR202_clade	NA	NA	NA
ASV_3119	8.07853	2.55647	0.747641	3.41938	0.000627641	0.00566313	Bacteria	Chloroflexi	Dehalococcoidia	SAR202_clade	NA	NA	NA
ASV_5335	3.08544	3.47993	1.14983	3.02649	0.00247414	0.0168254	Bacteria	Chloroflexi	Dehalococcoidia	SAR202_clade	NA	NA	NA
ASV_2841	3.26215	3.72844	1.2958	2.87733	0.00401053	0.0240197	Bacteria	Chloroflexi	Dehalococcoidia	SAR202_clade	NA	NA	NA
ASV_3625	1.30267	3.74303	1.32583	2.82317	0.00475514	0.0274457	Bacteria	Chloroflexi	Dehalococcoidia	SAR202_clade	NA	NA	NA
ASV_9731	1.51651	3.95289	1.52394	2.59387	0.00949034	0.045491	Bacteria	Chloroflexi	Dehalococcoidia	SAR202_clade	NA	NA	NA
ASV_5508	1.53118	3.9807	1.23466	3.22414	0.00126353	0.00979949	Bacteria	Chloroflexi	Dehalococcoidia	SAR202_clade	NA	NA	NA
ASV_3825	4.99018	3.99624	1.3291	3.00673	0.00264078	0.0176116	Bacteria	Chloroflexi	Dehalococcoidia	SAR202_clade	NA	NA	NA
ASV_8374	1.67122	4.10802	1.43485	2.86304	0.00419599	0.0248076	Bacteria	Chloroflexi	Dehalococcoidia	SAR202_clade	NA	NA	NA
ASV_7895	1.78925	4.21308	0.975753	4.31778	1.57608e-05	0.000262727	Bacteria	Chloroflexi	Dehalococcoidia	SAR202_clade	NA	NA	NA
ASV_3132	3.94642	4.23355	1.24639	3.39666	0.000682137	0.00596007	Bacteria	Chloroflexi	Dehalococcoidia	SAR202_clade	NA	NA	NA
ASV_6782	2.52754	4.38242	1.19324	3.6727	0.000239998	0.00260879	Bacteria	Chloroflexi	Dehalococcoidia	SAR202_clade	NA	NA	NA
ASV_3683	4.58587	4.93042	1.34911	3.65458	0.000257604	0.00274612	Bacteria	Chloroflexi	Dehalococcoidia	SAR202_clade	NA	NA	NA
ASV_6150	3.00066	4.9492	1.41964	3.48623	0.000489871	0.00466391	Bacteria	Chloroflexi	Dehalococcoidia	SAR202_clade	NA	NA	NA
ASV_4529	1.51233	3.28595	1.14363	2.87327	0.00406242	0.0241785	Bacteria	Chloroflexi	JG30-KF-CM66	NA	NA	NA	NA
ASV_6370	2.95427	4.92901	1.10888	4.44504	8.78756e-06	0.000159621	Bacteria	Chloroflexi	JG30-KF-CM66	NA	NA	NA	NA
ASV_4002	2.9999	4.94986	1.11322	4.44644	8.73057e-06	0.000159621	Bacteria	Chloroflexi	JG30-KF-CM66	NA	NA	NA	NA
ASV_3234	6.68923	6.10612	0.987497	6.18344	6.27215e-10	2.98576e-08	Bacteria	Chloroflexi	JG30-KF-CM66	NA	NA	NA	NA
ASV_188	93.2218	2.41823	0.685305	3.52869	0.000417625	0.00406232	Bacteria	Dadabacteria	Dadabacteriia	Dadabacteriales	NA	NA	NA
ASV_1593	16.0343	4.06687	0.928069	4.38208	1.17551e-05	0.000199116	Bacteria	Dadabacteria	Dadabacteriia	Dadabacteriales	NA	NA	NA
ASV_3155	6.27704	4.21425	0.97781	4.30989	1.63337e-05	0.000268437	Bacteria	Dadabacteria	Dadabacteriia	Dadabacteriales	NA	NA	NA
ASV_6678	2.38356	4.62059	1.54971	2.98158	0.00286767	0.0188515	Bacteria	Dadabacteria	Dadabacteriia	Dadabacteriales	NA	NA	NA
ASV_241	49.2623	5.94551	0.634513	9.37021	7.23889e-21	2.22073e-18	Bacteria	Dadabacteria	Dadabacteriia	Dadabacteriales	NA	NA	NA
ASV_2603	9.74776	6.64526	1.05821	6.2797	3.3922e-10	1.73442e-08	Bacteria	Dadabacteria	Dadabacteriia	Dadabacteriales	NA	NA	NA
ASV_1273	15.9047	1.94546	0.611651	3.18068	0.00146932	0.0111145	Bacteria	Entotheonellaeota	Entotheonellia	Entotheonellales	Entotheonellaceae	NA	NA
ASV_2018	13.8662	7.14852	0.761952	9.38186	6.48209e-21	2.22073e-18	Bacteria	Entotheonellaeota	Entotheonellia	Entotheonellales	Entotheonellaceae	NA	NA
ASV_6104	2.51975	3.88571	1.26723	3.06631	0.00216718	0.0154614	Bacteria	Firmicutes	Bacilli	Bacillales	Planococcaceae	Jeotgalibacillus	campisalis
ASV_6201	1.88322	4.28035	1.25362	3.41438	0.000639268	0.00573058	Bacteria	Firmicutes	Bacilli	Bacillales	Planococcaceae	Jeotgalibacillus	soli
ASV_4867	4.67977	5.5895	1.53805	3.63415	0.000278895	0.00292787	Bacteria	Gemmatimonadota	BD2-11_terrestrial_group	NA	NA	NA	NA
ASV_1915	5.25627	5.75022	1.30501	4.40625	1.05174e-05	0.000184958	Bacteria	Gemmatimonadota	BD2-11_terrestrial_group	NA	NA	NA	NA
ASV_589	11.8939	2.31792	0.683477	3.39137	0.000695449	0.00601923	Bacteria	Gemmatimonadota	Gemmatimonadetes	Gemmatimonadales	Gemmatimonadaceae	NA	NA
ASV_450	25.8109	3.4767	0.585253	5.94051	2.8414e-09	1.15369e-07	Bacteria	Gemmatimonadota	Gemmatimonadetes	Gemmatimonadales	Gemmatimonadaceae	NA	NA
ASV_2720	4.60731	4.07049	0.796304	5.11173	3.19226e-07	8.01258e-06	Bacteria	Gemmatimonadota	Gemmatimonadetes	Gemmatimonadales	Gemmatimonadaceae	NA	NA
ASV_3988	2.50327	4.19659	1.03776	4.0439	5.25684e-05	0.000714972	Bacteria	Gemmatimonadota	Gemmatimonadetes	Gemmatimonadales	Gemmatimonadaceae	NA	NA
ASV_7403	2.05503	4.38998	1.21667	3.6082	0.000308328	0.00315294	Bacteria	Gemmatimonadota	Gemmatimonadetes	Gemmatimonadales	Gemmatimonadaceae	NA	NA
ASV_2649	6.13863	4.47733	0.902096	4.96325	6.93223e-07	1.60839e-05	Bacteria	Gemmatimonadota	Gemmatimonadetes	Gemmatimonadales	Gemmatimonadaceae	NA	NA
ASV_2444	5.36426	5.30823	1.50708	3.5222	0.000427974	0.00414609	Bacteria	Gemmatimonadota	Gemmatimonadetes	Gemmatimonadales	Gemmatimonadaceae	NA	NA
ASV_3902	8.57816	6.45799	1.38601	4.65942	3.17099e-06	6.48525e-05	Bacteria	Gemmatimonadota	Gemmatimonadetes	Gemmatimonadales	Gemmatimonadaceae	NA	NA
ASV_353	78.7108	3.18812	0.622572	5.12088	3.04114e-07	7.70328e-06	Bacteria	Gemmatimonadota	PAUC43f_marine_benthic_group	NA	NA	NA	NA
ASV_582	22.8898	4.54052	1.07393	4.22795	2.35834e-05	0.000369964	Bacteria	Gemmatimonadota	PAUC43f_marine_benthic_group	NA	NA	NA	NA
ASV_7767	2.38302	4.6075	1.56837	2.93777	0.00330582	0.020697	Bacteria	Gemmatimonadota	PAUC43f_marine_benthic_group	NA	NA	NA	NA
ASV_6642	2.59348	4.73577	1.41375	3.34979	0.000808731	0.00687099	Bacteria	Gemmatimonadota	PAUC43f_marine_benthic_group	NA	NA	NA	NA
ASV_3973	3.3817	5.11502	1.96083	2.6086	0.0090914	0.0441925	Bacteria	Gemmatimonadota	PAUC43f_marine_benthic_group	NA	NA	NA	NA
ASV_2704	6.21669	5.99614	1.08336	5.53474	3.11688e-08	1.01243e-06	Bacteria	Gemmatimonadota	PAUC43f_marine_benthic_group	NA	NA	NA	NA
ASV_4351	6.97409	6.16092	1.59528	3.86197	0.000112477	0.00135611	Bacteria	Gemmatimonadota	PAUC43f_marine_benthic_group	NA	NA	NA	NA
ASV_2440	12.6197	7.01839	1.39978	5.01394	5.3327e-07	1.29154e-05	Bacteria	Gemmatimonadota	PAUC43f_marine_benthic_group	NA	NA	NA	NA
ASV_2604	12.7089	7.02753	1.32395	5.308	1.10834e-07	3.08998e-06	Bacteria	Gemmatimonadota	PAUC43f_marine_benthic_group	NA	NA	NA	NA
ASV_93	27.8527	3.57485	0.895316	3.99284	6.52869e-05	0.00085027	Bacteria	Methylomirabilota	Methylomirabilia	Methylomirabilales	Methylomirabilaceae	wb1-A12	NA
ASV_216	8.41023	6.43282	1.68293	3.82238	0.000132167	0.00156508	Bacteria	Methylomirabilota	Methylomirabilia	Methylomirabilales	Methylomirabilaceae	wb1-A12	NA
ASV_840	13.0238	1.78916	0.687549	2.60222	0.00926212	0.0448644	Bacteria	Myxococcota	bacteriap25	NA	NA	NA	NA
ASV_187	9.30698	2.75308	0.956723	2.87761	0.00400698	0.0240197	Bacteria	Myxococcota	bacteriap25	NA	NA	NA	NA
ASV_10610	1.11431	3.52096	1.31752	2.67241	0.00753095	0.0386486	Bacteria	Myxococcota	bacteriap25	NA	NA	NA	NA
ASV_3836	2.40266	4.62458	1.55508	2.97386	0.00294082	0.0191645	Bacteria	Myxococcota	bacteriap25	NA	NA	NA	NA
ASV_1149	4.80652	5.62339	1.38847	4.05005	5.12065e-05	0.000699907	Bacteria	Myxococcota	bacteriap25	NA	NA	NA	NA
ASV_4053	5.37863	5.78773	1.18484	4.88481	1.0353e-06	2.28677e-05	Bacteria	Myxococcota	bacteriap25	NA	NA	NA	NA
ASV_2673	10.3936	6.73999	1.0919	6.1727	6.71351e-10	3.11838e-08	Bacteria	Myxococcota	bacteriap25	NA	NA	NA	NA
ASV_1848	17.0656	7.45528	1.03199	7.22415	5.04251e-13	5.35476e-11	Bacteria	Myxococcota	Polyangia	Polyangiales	Sandaracinaceae	NA	NA
ASV_1724	18.544	7.57384	1.62739	4.65399	3.25575e-06	6.60966e-05	Bacteria	Myxococcota	Polyangia	Polyangiales	Sandaracinaceae	NA	NA
ASV_6344	2.2027	4.17439	1.06565	3.91721	8.95782e-05	0.00112421	Bacteria	Myxococcota	Polyangia	Polyangiales	Sandaracinaceae	Sandaracinus	NA
ASV_8307	1.83342	4.23983	1.33907	3.16624	0.00154423	0.0115233	Bacteria	Myxococcota	Polyangia	Polyangiales	Sandaracinaceae	Sandaracinus	NA
ASV_2940	7.36067	3.6747	0.893255	4.11383	3.89148e-05	0.000559603	Bacteria	NA	NA	NA	NA	NA	NA
ASV_2518	9.19743	3.759	1.38613	2.71187	0.00669052	0.0357651	Bacteria	NA	NA	NA	NA	NA	NA
ASV_5061	3.80096	5.28968	1.71908	3.07704	0.00209069	0.0150715	Bacteria	NA	NA	NA	NA	NA	NA
ASV_1251	20.9953	1.82577	0.596955	3.05848	0.00222466	0.0157687	Bacteria	NB1-j	NA	NA	NA	NA	NA
ASV_1998	7.51773	2.56137	0.980471	2.61239	0.00899126	0.0439378	Bacteria	NB1-j	NA	NA	NA	NA	NA
ASV_4110	4.5567	3.49607	1.33601	2.61681	0.00887566	0.043527	Bacteria	NB1-j	NA	NA	NA	NA	NA
ASV_5188	1.40247	3.85363	1.4935	2.58026	0.00987251	0.0465154	Bacteria	NB1-j	NA	NA	NA	NA	NA
ASV_7344	1.67176	3.9275	1.381	2.84395	0.00445576	0.0258997	Bacteria	NB1-j	NA	NA	NA	NA	NA
ASV_1862	1.73351	3.98499	1.18963	3.34977	0.000808791	0.00687099	Bacteria	NB1-j	NA	NA	NA	NA	NA
ASV_4910	1.91952	4.30309	1.6214	2.65393	0.00795603	0.0403057	Bacteria	NB1-j	NA	NA	NA	NA	NA
ASV_2871	2.04461	4.39412	1.35507	3.24273	0.00118391	0.0093661	Bacteria	NB1-j	NA	NA	NA	NA	NA
ASV_3256	7.00847	4.81173	0.9542	5.04268	4.59054e-07	1.13165e-05	Bacteria	NB1-j	NA	NA	NA	NA	NA
ASV_4574	2.01792	4.37325	1.53159	2.85538	0.00429858	0.0253356	Bacteria	Nitrospinota	Nitrospinia	Nitrospinales	Nitrospinaceae	NA	NA
ASV_3843	6.04385	4.57107	1.21448	3.76382	0.00016734	0.00191711	Bacteria	Nitrospinota	Nitrospinia	Nitrospinales	Nitrospinaceae	NA	NA
ASV_79	78.164	1.92777	0.486698	3.96091	7.46651e-05	0.0009544	Bacteria	Nitrospinota	Nitrospinia	Nitrospinales	Nitrospinaceae	Nitrospina	NA
ASV_1323	12.376	2.35863	0.877103	2.68911	0.00716426	0.0375779	Bacteria	Nitrospinota	Nitrospinia	Nitrospinales	Nitrospinaceae	Nitrospina	NA
ASV_1074	16.6873	2.46566	0.902536	2.73193	0.00629652	0.0340209	Bacteria	Nitrospinota	Nitrospinia	Nitrospinales	Nitrospinaceae	Nitrospina	NA
ASV_570	26.3792	3.14798	0.538544	5.84536	5.05464e-09	1.96562e-07	Bacteria	Nitrospinota	Nitrospinia	Nitrospinales	Nitrospinaceae	Nitrospina	NA
ASV_3638	3.7319	3.2782	1.00176	3.27245	0.0010662	0.00850805	Bacteria	Nitrospinota	Nitrospinia	Nitrospinales	Nitrospinaceae	Nitrospina	NA
ASV_461	41.9713	3.44669	0.685186	5.0303	4.8971e-07	1.19654e-05	Bacteria	Nitrospinota	Nitrospinia	Nitrospinales	Nitrospinaceae	Nitrospina	NA
ASV_1306	1.65323	3.73386	1.45804	2.56087	0.0104411	0.0486956	Bacteria	Nitrospinota	Nitrospinia	Nitrospinales	Nitrospinaceae	Nitrospina	NA
ASV_7136	2.44407	4.65448	1.19443	3.89681	9.74698e-05	0.00120679	Bacteria	Nitrospinota	Nitrospinia	Nitrospinales	Nitrospinaceae	Nitrospina	NA
ASV_4243	4.36542	5.49058	1.62446	3.37994	0.000725023	0.00625559	Bacteria	Nitrospinota	Nitrospinia	Nitrospinales	Nitrospinaceae	Nitrospina	NA
ASV_618	5.19404	5.73569	1.90108	3.01708	0.00255223	0.0172291	Bacteria	Nitrospinota	Nitrospinia	Nitrospinales	Nitrospinaceae	Nitrospina	NA
ASV_1833	6.35461	6.03365	1.17584	5.13133	2.87697e-07	7.42365e-06	Bacteria	Nitrospinota	Nitrospinia	Nitrospinales	Nitrospinaceae	Nitrospina	NA
ASV_567	8.02179	6.20946	0.885136	7.01526	2.2953e-12	1.81066e-10	Bacteria	Nitrospinota	Nitrospinia	Nitrospinales	Nitrospinaceae	Nitrospina	NA
ASV_2461	10.1775	2.4062	0.895135	2.68809	0.00718621	0.0375779	Bacteria	Nitrospinota	P9X2b3D02	NA	NA	NA	NA
ASV_1712	20.8226	3.22215	1.2047	2.67464	0.007481	0.0385355	Bacteria	Nitrospirota	Nitrospiria	Nitrospirales	Nitrospiraceae	Nitrospira	NA
ASV_1144	20.5317	3.32962	1.10185	3.02183	0.00251251	0.0170443	Bacteria	Nitrospirota	Nitrospiria	Nitrospirales	Nitrospiraceae	Nitrospira	NA
ASV_1472	24.4449	4.261	1.13523	3.75343	0.000174428	0.00198188	Bacteria	Nitrospirota	Nitrospiria	Nitrospirales	Nitrospiraceae	Nitrospira	NA
ASV_1594	27.4068	4.81346	1.30868	3.67811	0.000234972	0.00256426	Bacteria	Nitrospirota	Nitrospiria	Nitrospirales	Nitrospiraceae	Nitrospira	NA
ASV_555	71.2165	5.07071	1.37289	3.69346	0.000221224	0.00243346	Bacteria	Nitrospirota	Nitrospiria	Nitrospirales	Nitrospiraceae	Nitrospira	NA
ASV_3735	8.3101	6.41268	1.29032	4.96985	6.70046e-07	1.56779e-05	Bacteria	Nitrospirota	Nitrospiria	Nitrospirales	Nitrospiraceae	Nitrospira	NA
ASV_861	53.1195	8.17734	1.2644	6.46738	9.97147e-11	6.2571e-09	Bacteria	Nitrospirota	Nitrospiria	Nitrospirales	Nitrospiraceae	Nitrospira	NA
ASV_837	24.7204	1.83074	0.717767	2.5506	0.0107536	0.0495672	Bacteria	Planctomycetota	OM190	NA	NA	NA	NA
ASV_1432	22.3774	23.6898	2.2947	10.3237	5.50657e-25	3.04073e-22	Bacteria	Planctomycetota	Phycisphaerae	Phycisphaerales	Phycisphaeraceae	SM1A02	NA
ASV_6037	3.14079	3.55903	1.35168	2.63304	0.00846238	0.0421744	Bacteria	Planctomycetota	Planctomycetes	NA	NA	NA	NA
ASV_8079	2.21977	4.51018	1.67189	2.69766	0.00698292	0.0369345	Bacteria	Planctomycetota	Planctomycetes	Pirellulales	Pirellulaceae	Blastopirellula	NA
ASV_3242	9.55194	3.92609	1.17823	3.3322	0.000861617	0.00725282	Bacteria	Planctomycetota	Planctomycetes	Pirellulales	Pirellulaceae	Bythopirellula	NA
ASV_7483	1.88549	4.28834	1.29992	3.29893	0.000970531	0.00792792	Bacteria	Planctomycetota	Planctomycetes	Pirellulales	Pirellulaceae	Bythopirellula	NA
ASV_3062	7.75696	6.31699	1.01446	6.22696	4.75571e-10	2.34473e-08	Bacteria	Planctomycetota	Planctomycetes	Pirellulales	Pirellulaceae	Bythopirellula	NA
ASV_5430	1.58553	2.88243	0.946186	3.04636	0.00231627	0.0161495	Bacteria	Planctomycetota	Planctomycetes	Pirellulales	Pirellulaceae	NA	NA
ASV_3528	5.96501	3.45822	1.31148	2.63687	0.00836745	0.041916	Bacteria	Planctomycetota	Planctomycetes	Pirellulales	Pirellulaceae	NA	NA
ASV_5499	3.76886	4.64933	1.40474	3.30973	0.000933855	0.00769663	Bacteria	Planctomycetota	Planctomycetes	Pirellulales	Pirellulaceae	NA	NA
ASV_1725	15.2922	7.29694	0.698493	10.4467	1.51719e-25	1.04724e-22	Bacteria	Planctomycetota	Planctomycetes	Pirellulales	Pirellulaceae	NA	NA
ASV_2523	2.91433	2.00846	0.755985	2.65674	0.00788997	0.0401183	Bacteria	Planctomycetota	Planctomycetes	Pirellulales	Pirellulaceae	Pir4_lineage	NA
ASV_5997	2.78395	2.09636	0.812079	2.58147	0.00983797	0.0464319	Bacteria	Planctomycetota	Planctomycetes	Pirellulales	Pirellulaceae	Pir4_lineage	NA
ASV_6266	2.87569	2.67006	0.953835	2.79929	0.00512151	0.0288582	Bacteria	Planctomycetota	Planctomycetes	Pirellulales	Pirellulaceae	Pir4_lineage	NA
ASV_6914	1.326	3.09314	1.14826	2.69377	0.00706482	0.0372963	Bacteria	Planctomycetota	Planctomycetes	Pirellulales	Pirellulaceae	Pir4_lineage	NA
ASV_3356	1.18687	3.23718	1.15581	2.80078	0.00509796	0.0288432	Bacteria	Planctomycetota	Planctomycetes	Pirellulales	Pirellulaceae	Pir4_lineage	NA
ASV_4230	5.57102	4.29451	0.994724	4.31729	1.5796e-05	0.000262727	Bacteria	Planctomycetota	Planctomycetes	Pirellulales	Pirellulaceae	Pir4_lineage	NA
ASV_3805	4.44036	4.41043	1.08705	4.05726	4.96528e-05	0.000682819	Bacteria	Planctomycetota	Planctomycetes	Pirellulales	Pirellulaceae	Pir4_lineage	NA
ASV_6641	2.17862	4.48616	1.65255	2.7147	0.00663361	0.0355639	Bacteria	Planctomycetota	Planctomycetes	Pirellulales	Pirellulaceae	Pir4_lineage	NA
ASV_3056	9.13965	4.70824	0.845715	5.56717	2.58908e-08	8.91061e-07	Bacteria	Planctomycetota	Planctomycetes	Pirellulales	Pirellulaceae	Pir4_lineage	NA
ASV_1235	2.6032	4.74359	1.37954	3.43852	0.000584906	0.00536367	Bacteria	Planctomycetota	Planctomycetes	Pirellulales	Pirellulaceae	Pir4_lineage	NA
ASV_4698	2.97786	4.93573	1.69894	2.90517	0.00367052	0.022421	Bacteria	Planctomycetota	Planctomycetes	Pirellulales	Pirellulaceae	Pir4_lineage	NA
ASV_2965	4.03261	5.37774	1.13573	4.73507	2.18981e-06	4.58035e-05	Bacteria	Planctomycetota	Planctomycetes	Pirellulales	Pirellulaceae	Pir4_lineage	NA
ASV_4162	6.12602	5.9723	1.10823	5.38905	7.08317e-08	2.08049e-06	Bacteria	Planctomycetota	Planctomycetes	Pirellulales	Pirellulaceae	Pir4_lineage	NA
ASV_8909	1.73478	4.15718	1.51765	2.73922	0.00615843	0.0335373	Bacteria	Planctomycetota	Planctomycetes	Pirellulales	Pirellulaceae	Rhodopirellula	NA
ASV_8303	2.16444	4.47151	1.55718	2.87155	0.0040847	0.0242535	Bacteria	Planctomycetota	Planctomycetes	Pirellulales	Pirellulaceae	Rhodopirellula	NA
ASV_4892	5.0922	5.70795	1.85067	3.08427	0.00204054	0.0148261	Bacteria	Planctomycetota	Planctomycetes	Pirellulales	Pirellulaceae	Rhodopirellula	NA
ASV_2516	2.97015	2.76	1.01313	2.72424	0.00644496	0.0346872	Bacteria	Planctomycetota	Planctomycetes	Planctomycetales	Gimesiaceae	NA	NA
ASV_3236	2.31815	3.92623	1.33927	2.93162	0.00337197	0.0209685	Bacteria	Planctomycetota	Planctomycetes	Planctomycetales	Gimesiaceae	NA	NA
ASV_5429	2.73432	4.16329	1.1593	3.59121	0.000329144	0.00330461	Bacteria	Planctomycetota	Planctomycetes	Planctomycetales	Gimesiaceae	NA	NA
ASV_4215	7.91744	6.34523	2.06413	3.07405	0.00211174	0.0151442	Bacteria	Planctomycetota	Planctomycetes	Planctomycetales	Gimesiaceae	NA	NA
ASV_1952	4.33902	2.8886	1.07874	2.67776	0.0074117	0.0382499	Bacteria	Planctomycetota	Planctomycetes	Planctomycetales	NA	NA	NA
ASV_6593	1.74144	3.3469	1.30995	2.55498	0.0106195	0.0492779	Bacteria	Planctomycetota	Planctomycetes	Planctomycetales	NA	NA	NA
ASV_7088	2.37231	4.61146	1.29518	3.56048	0.000370174	0.00366326	Bacteria	Planctomycetota	Planctomycetes	Planctomycetales	Rubinisphaeraceae	Planctomicrobium	NA
ASV_3307	3.08664	3.49076	1.05341	3.31378	0.00092043	0.00764791	Bacteria	Planctomycetota	vadinHA49	NA	NA	NA	NA
ASV_1258	14.8655	2.089	0.522681	3.9967	6.4231e-05	0.000840482	Bacteria	Proteobacteria	Alphaproteobacteria	AT-s3-44	NA	NA	NA
ASV_7972	1.04577	3.43563	1.32138	2.60002	0.00932174	0.0449953	Bacteria	Proteobacteria	Alphaproteobacteria	AT-s3-44	NA	NA	NA
ASV_2837	3.05505	3.35018	1.06219	3.15404	0.00161029	0.0119838	Bacteria	Proteobacteria	Alphaproteobacteria	Defluviicoccales	NA	NA	NA
ASV_3154	3.12038	4.18592	0.935867	4.47277	7.72116e-06	0.000145021	Bacteria	Proteobacteria	Alphaproteobacteria	Defluviicoccales	NA	NA	NA
ASV_3032	3.24346	5.05811	1.95915	2.58178	0.0098292	0.0464319	Bacteria	Proteobacteria	Alphaproteobacteria	Defluviicoccales	NA	NA	NA
ASV_544	27.182	1.98032	0.474496	4.17352	2.99926e-05	0.000447619	Bacteria	Proteobacteria	Alphaproteobacteria	Kiloniellales	Kiloniellaceae	NA	NA
ASV_243	40.4309	2.17286	0.607484	3.57681	0.000347808	0.00346678	Bacteria	Proteobacteria	Alphaproteobacteria	Kiloniellales	Kiloniellaceae	NA	NA
ASV_2103	1.94985	4.32117	1.56149	2.76733	0.00565175	0.0312715	Bacteria	Proteobacteria	Alphaproteobacteria	Kiloniellales	Kiloniellaceae	NA	NA
ASV_7266	2.22421	4.51791	1.76905	2.55386	0.0106536	0.0493533	Bacteria	Proteobacteria	Alphaproteobacteria	Kiloniellales	Kiloniellaceae	NA	NA
ASV_6757	2.28262	4.56255	1.00217	4.55267	5.29702e-06	0.000102994	Bacteria	Proteobacteria	Alphaproteobacteria	Kiloniellales	Kiloniellaceae	NA	NA
ASV_6204	2.32219	4.57922	1.77167	2.5847	0.00974637	0.0463162	Bacteria	Proteobacteria	Alphaproteobacteria	Kiloniellales	Kiloniellaceae	NA	NA
ASV_726	2.33277	4.58786	1.65027	2.78007	0.00543475	0.0303752	Bacteria	Proteobacteria	Alphaproteobacteria	Kiloniellales	Kiloniellaceae	NA	NA
ASV_3623	2.53143	4.70247	1.54714	3.03946	0.00237003	0.0163183	Bacteria	Proteobacteria	Alphaproteobacteria	Kiloniellales	Kiloniellaceae	NA	NA
ASV_3201	2.62318	4.75407	1.12103	4.24081	2.22716e-05	0.000355444	Bacteria	Proteobacteria	Alphaproteobacteria	Kiloniellales	Kiloniellaceae	NA	NA
ASV_7056	2.65873	4.77114	1.50335	3.17368	0.00150521	0.0113549	Bacteria	Proteobacteria	Alphaproteobacteria	Kiloniellales	Kiloniellaceae	NA	NA
ASV_5638	3.32041	4.92249	1.36184	3.61458	0.000300834	0.00309926	Bacteria	Proteobacteria	Alphaproteobacteria	Kiloniellales	Kiloniellaceae	NA	NA
ASV_5738	3.22174	5.04964	1.48827	3.39295	0.000691443	0.00601639	Bacteria	Proteobacteria	Alphaproteobacteria	Kiloniellales	Kiloniellaceae	NA	NA
ASV_4671	4.63973	5.25281	1.45819	3.60228	0.000315436	0.003192	Bacteria	Proteobacteria	Alphaproteobacteria	Kiloniellales	Kiloniellaceae	NA	NA
ASV_3100	4.4427	5.51637	1.61991	3.40536	0.000660774	0.00580731	Bacteria	Proteobacteria	Alphaproteobacteria	Kiloniellales	Kiloniellaceae	NA	NA
ASV_924	9.27508	5.6342	1.03766	5.42972	5.6442e-08	1.71249e-06	Bacteria	Proteobacteria	Alphaproteobacteria	Kiloniellales	Kiloniellaceae	NA	NA
ASV_2987	5.58847	5.84372	2.00141	2.9198	0.00350254	0.021586	Bacteria	Proteobacteria	Alphaproteobacteria	Kiloniellales	Kiloniellaceae	NA	NA
ASV_3705	6.57804	6.08003	1.32236	4.59788	4.26805e-06	8.60153e-05	Bacteria	Proteobacteria	Alphaproteobacteria	Kiloniellales	Kiloniellaceae	NA	NA
ASV_3369	8.13538	6.38464	1.27738	4.99822	5.78618e-07	1.37721e-05	Bacteria	Proteobacteria	Alphaproteobacteria	Kiloniellales	Kiloniellaceae	NA	NA
ASV_2433	11.0963	6.83495	1.27641	5.35483	8.56353e-08	2.48883e-06	Bacteria	Proteobacteria	Alphaproteobacteria	Kiloniellales	Kiloniellaceae	NA	NA
ASV_2302	12.0838	6.95844	1.14039	6.10179	1.04888e-09	4.59678e-08	Bacteria	Proteobacteria	Alphaproteobacteria	Kiloniellales	Kiloniellaceae	NA	NA
ASV_4880	6.06086	5.95897	1.78047	3.34686	0.00081733	0.00692224	Bacteria	Proteobacteria	Alphaproteobacteria	Kordiimonadales	Kordiimonadaceae	Kordiimonas	NA
ASV_2467	2.44218	4.65968	0.944756	4.93215	8.13283e-07	1.85576e-05	Bacteria	Proteobacteria	Alphaproteobacteria	NA	NA	NA	NA
ASV_2193	3.03589	4.96643	1.11143	4.46848	7.87759e-06	0.00014696	Bacteria	Proteobacteria	Alphaproteobacteria	NA	NA	NA	NA
ASV_5158	3.22979	5.05187	1.95057	2.58995	0.00959902	0.0458376	Bacteria	Proteobacteria	Alphaproteobacteria	NA	NA	NA	NA
ASV_3145	4.7601	5.61027	1.0933	5.13149	2.87453e-07	7.42365e-06	Bacteria	Proteobacteria	Alphaproteobacteria	NA	NA	NA	NA
ASV_2925	10.5568	6.76152	1.27866	5.28798	1.23672e-07	3.34763e-06	Bacteria	Proteobacteria	Alphaproteobacteria	NA	NA	NA	NA
ASV_2653	6.76498	6.11863	0.76877	7.95899	1.73454e-15	2.81709e-13	Bacteria	Proteobacteria	Alphaproteobacteria	Rhizobiales	Hyphomicrobiaceae	NA	NA
ASV_1271	14.5649	7.22439	0.792218	9.11919	7.56858e-20	1.7414e-17	Bacteria	Proteobacteria	Alphaproteobacteria	Rhizobiales	Hyphomicrobiaceae	NA	NA
ASV_1949	2.3258	3.7658	1.36284	2.76321	0.0057236	0.0316057	Bacteria	Proteobacteria	Alphaproteobacteria	Rhizobiales	KF-JG30-B3	NA	NA
ASV_5391	2.14863	2.72714	1.00923	2.7022	0.00688819	0.0366441	Bacteria	Proteobacteria	Alphaproteobacteria	Rhizobiales	Methyloligellaceae	Methyloceanibacter	NA
ASV_219	80.7033	1.7868	0.444246	4.02209	5.76844e-05	0.000761967	Bacteria	Proteobacteria	Alphaproteobacteria	Rhizobiales	Methyloligellaceae	NA	NA
ASV_1040	27.54	2.68729	0.863655	3.11154	0.00186116	0.0136744	Bacteria	Proteobacteria	Alphaproteobacteria	Rhizobiales	Methyloligellaceae	NA	NA
ASV_339	98.6933	3.45401	1.04247	3.31328	0.000922087	0.00764791	Bacteria	Proteobacteria	Alphaproteobacteria	Rhizobiales	Methyloligellaceae	NA	NA
ASV_458	73.5979	3.62493	0.916809	3.95386	7.68999e-05	0.000973948	Bacteria	Proteobacteria	Alphaproteobacteria	Rhizobiales	Methyloligellaceae	NA	NA
ASV_3522	7.79098	5.85934	1.94177	3.01753	0.00254847	0.0172291	Bacteria	Proteobacteria	Alphaproteobacteria	Rhodospirillales	Magnetospiraceae	NA	NA
ASV_3188	7.98205	3.18912	0.900101	3.54308	0.00039549	0.00387215	Bacteria	Proteobacteria	Alphaproteobacteria	Tistrellales	Geminicoccaceae	NA	NA
ASV_7037	1.18497	3.61843	1.41163	2.56329	0.0103685	0.0486037	Bacteria	Proteobacteria	Alphaproteobacteria	Tistrellales	Geminicoccaceae	NA	NA
ASV_547	7.97578	6.35667	1.92809	3.29687	0.000977688	0.0079394	Bacteria	Proteobacteria	Gammaproteobacteria	Alteromonadales	Shewanellaceae	Psychrobium	NA
ASV_66	37.1699	2.59563	0.453671	5.72139	1.05656e-08	3.9961e-07	Bacteria	Proteobacteria	Gammaproteobacteria	AT-s2-59	NA	NA	NA
ASV_979	2.54996	3.70647	1.24996	2.96526	0.00302422	0.0194636	Bacteria	Proteobacteria	Gammaproteobacteria	AT-s2-59	NA	NA	NA
ASV_1042	12.7842	3.72102	1.35989	2.73626	0.00621411	0.0337076	Bacteria	Proteobacteria	Gammaproteobacteria	BD7-8	NA	NA	NA
ASV_1888	4.92664	4.35854	1.4307	3.04645	0.00231561	0.0161495	Bacteria	Proteobacteria	Gammaproteobacteria	BD7-8	NA	NA	NA
ASV_5172	6.1846	5.9837	1.70694	3.5055	0.000455745	0.00438437	Bacteria	Proteobacteria	Gammaproteobacteria	BD7-8	NA	NA	NA
ASV_2499	9.69056	6.17639	1.1591	5.32859	9.89766e-08	2.78851e-06	Bacteria	Proteobacteria	Gammaproteobacteria	BD7-8	NA	NA	NA
ASV_1561	3.0338	4.9625	1.91992	2.58475	0.00974508	0.0463162	Bacteria	Proteobacteria	Gammaproteobacteria	Burkholderiales	Nitrosomonadaceae	NA	NA
ASV_118	59.5212	2.26068	0.3178	7.11354	1.13105e-12	1.00736e-10	Bacteria	Proteobacteria	Gammaproteobacteria	Burkholderiales	Nitrosomonadaceae	Nitrosomonas	NA
ASV_4591	4.16232	5.42129	1.40687	3.85343	0.000116472	0.00138928	Bacteria	Proteobacteria	Gammaproteobacteria	Burkholderiales	Nitrosomonadaceae	Nitrosomonas	NA
ASV_670	10.7295	6.01888	0.897028	6.70981	1.94883e-11	1.34518e-09	Bacteria	Proteobacteria	Gammaproteobacteria	Burkholderiales	Nitrosomonadaceae	Nitrosomonas	NA
ASV_1237	7.36672	6.24407	1.39933	4.46219	8.11279e-06	0.000149329	Bacteria	Proteobacteria	Gammaproteobacteria	Burkholderiales	Nitrosomonadaceae	Nitrosomonas	NA
ASV_3564	9.61928	6.6241	1.46196	4.53097	5.87127e-06	0.000112573	Bacteria	Proteobacteria	Gammaproteobacteria	Burkholderiales	Nitrosomonadaceae	Nitrosomonas	NA
ASV_2910	2.02408	4.37787	1.3997	3.12772	0.0017617	0.0130055	Bacteria	Proteobacteria	Gammaproteobacteria	EPR3968-O8a-Bc78	NA	NA	NA
ASV_4003	4.49393	3.89564	1.35815	2.86835	0.00412625	0.0244476	Bacteria	Proteobacteria	Gammaproteobacteria	Gammaproteobacteria_Incertae_Sedis	Unknown_Family	NA	NA
ASV_7548	2.5941	4.73506	1.79181	2.64261	0.00822692	0.0413744	Bacteria	Proteobacteria	Gammaproteobacteria	Gammaproteobacteria_Incertae_Sedis	Unknown_Family	NA	NA
ASV_515	28.4096	7.72966	0.84749	9.12065	7.46726e-20	1.7414e-17	Bacteria	Proteobacteria	Gammaproteobacteria	JTB23	NA	NA	NA
ASV_1726	2.90793	4.89976	1.80749	2.71081	0.00671184	0.0357749	Bacteria	Proteobacteria	Gammaproteobacteria	KI89A_clade	NA	NA	NA
ASV_1879	2.03896	4.38837	1.44306	3.04101	0.00235785	0.0162751	Bacteria	Proteobacteria	Gammaproteobacteria	MBMPE27	NA	NA	NA
ASV_2669	7.99604	4.92155	1.10285	4.46256	8.09855e-06	0.000149329	Bacteria	Proteobacteria	Gammaproteobacteria	MBMPE27	NA	NA	NA
ASV_786	16.9575	5.30851	1.60777	3.30178	0.000960727	0.00787112	Bacteria	Proteobacteria	Gammaproteobacteria	MBMPE27	NA	NA	NA
ASV_236	31.5753	8.34251	1.03907	8.02879	9.84412e-16	1.69873e-13	Bacteria	Proteobacteria	Gammaproteobacteria	MBMPE27	NA	NA	NA
ASV_3981	4.43425	2.17682	0.839804	2.59206	0.00954035	0.0456515	Bacteria	Proteobacteria	Gammaproteobacteria	NA	NA	NA	NA
ASV_8452	2.72338	4.79059	1.61103	2.97363	0.00294304	0.0191645	Bacteria	Proteobacteria	Gammaproteobacteria	NA	NA	NA	NA
ASV_579	4.77863	4.13271	1.02225	4.04276	5.28266e-05	0.000714972	Bacteria	Proteobacteria	Gammaproteobacteria	Nitrosococcales	Nitrosococcaceae	AqS1	NA
ASV_7323	3.46597	5.14798	1.95831	2.62879	0.00856889	0.0424741	Bacteria	Proteobacteria	Gammaproteobacteria	Nitrosococcales	Nitrosococcaceae	AqS1	NA
ASV_5356	4.27083	5.45382	1.30668	4.17378	2.99581e-05	0.000447619	Bacteria	Proteobacteria	Gammaproteobacteria	Nitrosococcales	Nitrosococcaceae	AqS1	NA
ASV_224	10.6556	6.77511	1.09847	6.16774	6.92722e-10	3.13542e-08	Bacteria	Proteobacteria	Gammaproteobacteria	Nitrosococcales	Nitrosococcaceae	AqS1	NA
ASV_1930	15.4067	7.30847	1.01915	7.17116	7.43636e-13	7.33278e-11	Bacteria	Proteobacteria	Gammaproteobacteria	Nitrosococcales	Nitrosococcaceae	AqS1	NA
ASV_4412	4.4109	4.25116	1.10272	3.85517	0.000115648	0.00138828	Bacteria	Proteobacteria	Gammaproteobacteria	Oceanospirillales	Kangiellaceae	NA	NA
ASV_6421	3.03246	4.96383	1.67823	2.95777	0.00309872	0.0197133	Bacteria	Proteobacteria	Gammaproteobacteria	pItb-vmat-80	NA	NA	NA
ASV_4664	4.98156	5.20609	1.47542	3.52854	0.000417856	0.00406232	Bacteria	Proteobacteria	Gammaproteobacteria	pItb-vmat-80	NA	NA	NA
ASV_4089	6.91029	6.14947	1.58442	3.88121	0.000103937	0.00127138	Bacteria	Proteobacteria	Gammaproteobacteria	pItb-vmat-80	NA	NA	NA
ASV_1894	22.3728	7.8437	1.45289	5.39868	6.71344e-08	1.9931e-06	Bacteria	Proteobacteria	Gammaproteobacteria	pItb-vmat-80	NA	NA	NA
ASV_175	76.3152	2.07906	0.282594	7.35706	1.88004e-13	2.25687e-11	Bacteria	Proteobacteria	Gammaproteobacteria	Steroidobacterales	Woeseiaceae	Woeseia	NA
ASV_419	45.3519	2.09252	0.339077	6.17122	6.77664e-10	3.11838e-08	Bacteria	Proteobacteria	Gammaproteobacteria	Steroidobacterales	Woeseiaceae	Woeseia	NA
ASV_1141	11.4714	2.19285	0.727208	3.01544	0.0025661	0.0172805	Bacteria	Proteobacteria	Gammaproteobacteria	Steroidobacterales	Woeseiaceae	Woeseia	NA
ASV_953	32.958	2.24438	0.652873	3.4377	0.000586682	0.00536367	Bacteria	Proteobacteria	Gammaproteobacteria	Steroidobacterales	Woeseiaceae	Woeseia	NA
ASV_678	40.7071	2.52703	0.700947	3.60517	0.000311954	0.00317824	Bacteria	Proteobacteria	Gammaproteobacteria	Steroidobacterales	Woeseiaceae	Woeseia	NA
ASV_1028	5.43428	2.82001	0.769932	3.66268	0.000249591	0.00268141	Bacteria	Proteobacteria	Gammaproteobacteria	Steroidobacterales	Woeseiaceae	Woeseia	NA
ASV_972	39.9983	3.26151	1.22628	2.65969	0.00782134	0.0398427	Bacteria	Proteobacteria	Gammaproteobacteria	Steroidobacterales	Woeseiaceae	Woeseia	NA
ASV_1917	6.37093	3.41382	1.15167	2.96422	0.0030345	0.0194843	Bacteria	Proteobacteria	Gammaproteobacteria	Steroidobacterales	Woeseiaceae	Woeseia	NA
ASV_2697	1.58457	4.00835	0.996857	4.02099	5.79547e-05	0.000761967	Bacteria	Proteobacteria	Gammaproteobacteria	Steroidobacterales	Woeseiaceae	Woeseia	NA
ASV_704	3.573	4.1112	0.983846	4.1787	2.93179e-05	0.000444762	Bacteria	Proteobacteria	Gammaproteobacteria	Steroidobacterales	Woeseiaceae	Woeseia	NA
ASV_3574	6.82615	4.31131	1.30238	3.31034	0.000931823	0.00769663	Bacteria	Proteobacteria	Gammaproteobacteria	Steroidobacterales	Woeseiaceae	Woeseia	NA
ASV_3464	2.39255	4.46345	1.17488	3.79907	0.00014524	0.00170642	Bacteria	Proteobacteria	Gammaproteobacteria	Steroidobacterales	Woeseiaceae	Woeseia	NA
ASV_5980	2.15313	4.46874	1.30969	3.41206	0.000644734	0.00576088	Bacteria	Proteobacteria	Gammaproteobacteria	Steroidobacterales	Woeseiaceae	Woeseia	NA
ASV_8253	2.57009	4.70997	1.58327	2.97483	0.0029315	0.0191645	Bacteria	Proteobacteria	Gammaproteobacteria	Steroidobacterales	Woeseiaceae	Woeseia	NA
ASV_7089	2.70478	4.79741	1.80987	2.65069	0.00803273	0.0406197	Bacteria	Proteobacteria	Gammaproteobacteria	Steroidobacterales	Woeseiaceae	Woeseia	NA
ASV_4777	4.79395	5.62415	1.44278	3.89814	9.69362e-05	0.00120559	Bacteria	Proteobacteria	Gammaproteobacteria	Steroidobacterales	Woeseiaceae	Woeseia	NA
ASV_4641	5.05105	5.69946	1.39979	4.07166	4.66787e-05	0.000652067	Bacteria	Proteobacteria	Gammaproteobacteria	Steroidobacterales	Woeseiaceae	Woeseia	NA
ASV_1023	24.3959	6.47377	1.37525	4.70735	2.50961e-06	5.2098e-05	Bacteria	Proteobacteria	Gammaproteobacteria	Steroidobacterales	Woeseiaceae	Woeseia	NA
ASV_3520	8.88871	6.51103	1.70379	3.8215	0.000132643	0.00156508	Bacteria	Proteobacteria	Gammaproteobacteria	Steroidobacterales	Woeseiaceae	Woeseia	NA
ASV_2984	9.43979	6.60172	1.04814	6.29851	3.00519e-10	1.62692e-08	Bacteria	Proteobacteria	Gammaproteobacteria	Steroidobacterales	Woeseiaceae	Woeseia	NA
ASV_2716	12.5835	7.01385	1.63029	4.3022	1.69113e-05	0.000274002	Bacteria	Proteobacteria	Gammaproteobacteria	Steroidobacterales	Woeseiaceae	Woeseia	NA
ASV_2297	13.1388	7.07847	1.0002	7.07707	1.47235e-12	1.27036e-10	Bacteria	Proteobacteria	Gammaproteobacteria	Steroidobacterales	Woeseiaceae	Woeseia	NA
ASV_2231	17.6364	7.50097	1.67342	4.48241	7.38056e-06	0.000140536	Bacteria	Proteobacteria	Gammaproteobacteria	Steroidobacterales	Woeseiaceae	Woeseia	NA
ASV_1057	39.2233	8.50153	1.09507	7.76343	8.26616e-15	1.26794e-12	Bacteria	Proteobacteria	Gammaproteobacteria	Steroidobacterales	Woeseiaceae	Woeseia	NA
ASV_1153	35.6716	8.51727	1.29423	6.58094	4.67493e-11	3.07321e-09	Bacteria	Proteobacteria	Gammaproteobacteria	Steroidobacterales	Woeseiaceae	Woeseia	NA
ASV_11713	1.14965	3.55468	1.35698	2.61955	0.00880467	0.0434102	Bacteria	SAR324_clade(Marine_group_B)	NA	NA	NA	NA	NA
ASV_644	40.5168	4.23119	0.658753	6.42303	1.33588e-10	7.8476e-09	Bacteria	SAR324_clade(Marine_group_B)	NA	NA	NA	NA	NA
ASV_7137	2.29369	4.56587	1.17289	3.89282	9.90847e-05	0.00122131	Bacteria	SAR324_clade(Marine_group_B)	NA	NA	NA	NA	NA
ASV_4315	5.52499	4.66575	1.06116	4.39683	1.09844e-05	0.00018955	Bacteria	SAR324_clade(Marine_group_B)	NA	NA	NA	NA	NA
ASV_5998	3.64426	5.22704	1.72707	3.02653	0.00247382	0.0168254	Bacteria	SAR324_clade(Marine_group_B)	NA	NA	NA	NA	NA
ASV_6151	3.79753	5.27764	1.14863	4.59473	4.33304e-06	8.66922e-05	Bacteria	SAR324_clade(Marine_group_B)	NA	NA	NA	NA	NA
ASV_6064	4.09721	5.39463	2.10922	2.55765	0.0105384	0.0489839	Bacteria	SAR324_clade(Marine_group_B)	NA	NA	NA	NA	NA
ASV_4327	5.60053	5.84721	1.64493	3.55468	0.000378441	0.0037317	Bacteria	SAR324_clade(Marine_group_B)	NA	NA	NA	NA	NA
ASV_1845	10.8123	5.8655	1.19582	4.905	9.34296e-07	2.11442e-05	Bacteria	SAR324_clade(Marine_group_B)	NA	NA	NA	NA	NA
ASV_3980	6.81875	6.13056	1.79392	3.41741	0.000632198	0.00568566	Bacteria	SAR324_clade(Marine_group_B)	NA	NA	NA	NA	NA
ASV_2313	12.3338	6.52546	0.927209	7.03774	1.95379e-12	1.63467e-10	Bacteria	SAR324_clade(Marine_group_B)	NA	NA	NA	NA	NA
ASV_2483	10.9977	6.82158	1.62621	4.19478	2.73138e-05	0.000418963	Bacteria	SAR324_clade(Marine_group_B)	NA	NA	NA	NA	NA
ASV_2463	12.1997	6.97077	1.64769	4.23064	2.33031e-05	0.000367656	Bacteria	SAR324_clade(Marine_group_B)	NA	NA	NA	NA	NA
ASV_2426	13.2655	7.09088	1.12067	6.32734	2.49428e-10	1.37734e-08	Bacteria	SAR324_clade(Marine_group_B)	NA	NA	NA	NA	NA
ASV_1984	19.041	7.61168	1.36818	5.56335	2.64639e-08	8.91061e-07	Bacteria	SAR324_clade(Marine_group_B)	NA	NA	NA	NA	NA
ASV_931	36.8472	8.56542	0.936819	9.14309	6.06911e-20	1.67568e-17	Bacteria	SAR324_clade(Marine_group_B)	NA	NA	NA	NA	NA
ASV_7729	2.19709	4.49838	1.50325	2.99244	0.00276757	0.0183244	Bacteria	Sumerlaeota	Sumerlaeia	NA	NA	NA	NA
ASV_1898	16.5824	4.10495	1.2447	3.29794	0.000973965	0.0079325	Bacteria	Verrucomicrobiota	Kiritimatiellae	WCHB1-41	NA	NA	NA
ASV_3217	7.01095	6.17163	1.7942	3.43976	0.00058222	0.00536367	Bacteria	Verrucomicrobiota	Kiritimatiellae	WCHB1-41	NA	NA	NA
ASV_7761	1.77033	2.67502	1.04504	2.55974	0.0104751	0.0487721	Bacteria	Verrucomicrobiota	Lentisphaeria	Victivallales	Arctic95B-14	NA	NA
ASV_4022	3.7453	3.38608	1.13933	2.97199	0.00295881	0.0191887	Bacteria	Verrucomicrobiota	Omnitrophia	Omnitrophales	Omnitrophaceae	Candidatus_Omnitrophus	NA
ASV_8302	1.82759	4.2322	1.22402	3.45763	0.000544946	0.00510033	Bacteria	Verrucomicrobiota	Omnitrophia	Omnitrophales	Omnitrophaceae	Candidatus_Omnitrophus	NA
Enriched in nodules from western CCZ
	baseMean	log2FoldChange	lfcSE	stat	pvalue	padj	Kingdom	Phylum	Class	Order	Family	Genus	Species
ASV_47	7.99792	-6.74761	1.72853	-3.90366	9.47487e-05	0.00118372	Archaea	Crenarchaeota	Nitrososphaeria	Nitrosopumilales	Nitrosopumilaceae	Candidatus_Nitrosopumilus	NA
ASV_2215	7.40714	-6.63793	1.16145	-5.7152	1.09576e-08	4.03385e-07	Archaea	Crenarchaeota	Nitrososphaeria	Nitrosopumilales	Nitrosopumilaceae	Candidatus_Nitrosopumilus	NA
ASV_2062	5.55645	-5.69408	1.86439	-3.05413	0.00225713	0.015866	Archaea	Crenarchaeota	Nitrososphaeria	Nitrosopumilales	Nitrosopumilaceae	Candidatus_Nitrosopumilus	NA
ASV_1024	6.7881	-5.09673	0.749117	-6.80365	1.02003e-11	7.41133e-10	Archaea	Crenarchaeota	Nitrososphaeria	Nitrosopumilales	Nitrosopumilaceae	Candidatus_Nitrosopumilus	NA
ASV_1963	4.14727	-4.83208	0.666027	-7.25507	4.01441e-13	4.43352e-11	Archaea	Crenarchaeota	Nitrososphaeria	Nitrosopumilales	Nitrosopumilaceae	Candidatus_Nitrosopumilus	NA
ASV_1618	13.1366	-4.67024	1.48232	-3.15062	0.00162922	0.0120921	Archaea	Crenarchaeota	Nitrososphaeria	Nitrosopumilales	Nitrosopumilaceae	Candidatus_Nitrosopumilus	NA
ASV_1892	6.47585	-4.45712	1.32716	-3.35839	0.000783978	0.00670143	Archaea	Crenarchaeota	Nitrososphaeria	Nitrosopumilales	Nitrosopumilaceae	Candidatus_Nitrosopumilus	NA
ASV_755	2.67882	-4.17191	1.48493	-2.8095	0.00496186	0.0283638	Archaea	Crenarchaeota	Nitrososphaeria	Nitrosopumilales	Nitrosopumilaceae	Candidatus_Nitrosopumilus	NA
ASV_218	23.5933	-3.78094	0.712548	-5.30623	1.11915e-07	3.08998e-06	Archaea	Crenarchaeota	Nitrososphaeria	Nitrosopumilales	Nitrosopumilaceae	Candidatus_Nitrosopumilus	NA
ASV_64	20.3307	-3.60894	0.659793	-5.4698	4.50539e-08	1.41357e-06	Archaea	Crenarchaeota	Nitrososphaeria	Nitrosopumilales	Nitrosopumilaceae	Candidatus_Nitrosopumilus	NA
ASV_3290	0.899069	-3.60355	1.32724	-2.71507	0.00662614	0.0355639	Archaea	Crenarchaeota	Nitrososphaeria	Nitrosopumilales	Nitrosopumilaceae	Candidatus_Nitrosopumilus	NA
ASV_5972	1.85943	-3.59446	0.926462	-3.87977	0.000104555	0.0012717	Archaea	Crenarchaeota	Nitrososphaeria	Nitrosopumilales	Nitrosopumilaceae	Candidatus_Nitrosopumilus	NA
ASV_1194	12.9016	-3.42992	0.952192	-3.60213	0.000315616	0.003192	Archaea	Crenarchaeota	Nitrososphaeria	Nitrosopumilales	Nitrosopumilaceae	Candidatus_Nitrosopumilus	NA
ASV_367	19.9118	-3.13716	0.878662	-3.57039	0.000356454	0.00354018	Archaea	Crenarchaeota	Nitrososphaeria	Nitrosopumilales	Nitrosopumilaceae	Candidatus_Nitrosopumilus	NA
ASV_54	41.0941	-2.58204	0.613066	-4.21168	2.53475e-05	0.000390975	Archaea	Crenarchaeota	Nitrososphaeria	Nitrosopumilales	Nitrosopumilaceae	Candidatus_Nitrosopumilus	NA
ASV_2695	3.90839	-2.31159	0.52538	-4.39984	1.08329e-05	0.000188111	Archaea	Crenarchaeota	Nitrososphaeria	Nitrosopumilales	Nitrosopumilaceae	Candidatus_Nitrosopumilus	NA
ASV_1419	2.63773	-2.17529	0.730036	-2.9797	0.00288532	0.0189225	Archaea	Crenarchaeota	Nitrososphaeria	Nitrosopumilales	Nitrosopumilaceae	Candidatus_Nitrosopumilus	NA
ASV_1204	14.2414	-2.10856	0.805406	-2.618	0.00884457	0.0434517	Archaea	Crenarchaeota	Nitrososphaeria	Nitrosopumilales	Nitrosopumilaceae	Candidatus_Nitrosopumilus	NA
ASV_504	32.5384	-1.90939	0.485227	-3.93505	8.31791e-05	0.00104866	Archaea	Crenarchaeota	Nitrososphaeria	Nitrosopumilales	Nitrosopumilaceae	Candidatus_Nitrosopumilus	NA
ASV_113	103.527	-1.63682	0.473976	-3.45338	0.000553606	0.00514649	Archaea	Crenarchaeota	Nitrososphaeria	Nitrosopumilales	Nitrosopumilaceae	Candidatus_Nitrosopumilus	NA
ASV_194	12.5656	-1.63644	0.594784	-2.75131	0.00593576	0.0325171	Archaea	Crenarchaeota	Nitrososphaeria	Nitrosopumilales	Nitrosopumilaceae	Candidatus_Nitrosopumilus	NA
ASV_654	31.7972	-8.73929	1.04727	-8.34485	7.13058e-17	1.40625e-14	Archaea	Crenarchaeota	Nitrososphaeria	Nitrosopumilales	Nitrosopumilaceae	NA	NA
ASV_271	22.9503	-8.26883	0.764606	-10.8145	2.93871e-27	2.70459e-24	Archaea	Crenarchaeota	Nitrososphaeria	Nitrosopumilales	Nitrosopumilaceae	NA	NA
ASV_763	6.66609	-6.4864	1.57905	-4.10778	3.99481e-05	0.000571486	Archaea	Crenarchaeota	Nitrososphaeria	Nitrosopumilales	Nitrosopumilaceae	NA	NA
ASV_619	6.13997	-6.36716	1.57793	-4.03515	5.45682e-05	0.00073494	Archaea	Crenarchaeota	Nitrososphaeria	Nitrosopumilales	Nitrosopumilaceae	NA	NA
ASV_298	7.88004	-6.0058	1.06169	-5.65682	1.54207e-08	5.60216e-07	Archaea	Crenarchaeota	Nitrososphaeria	Nitrosopumilales	Nitrosopumilaceae	NA	NA
ASV_652	3.89232	-5.70504	1.32631	-4.30143	1.69701e-05	0.000274002	Archaea	Crenarchaeota	Nitrososphaeria	Nitrosopumilales	Nitrosopumilaceae	NA	NA
ASV_3060	3.83507	-5.68764	1.521	-3.73941	0.000184449	0.00208715	Archaea	Crenarchaeota	Nitrososphaeria	Nitrosopumilales	Nitrosopumilaceae	NA	NA
ASV_370	4.32678	-5.64057	1.58743	-3.55326	0.000380489	0.00373854	Archaea	Crenarchaeota	Nitrososphaeria	Nitrosopumilales	Nitrosopumilaceae	NA	NA
ASV_402	2.83507	-5.25014	1.54037	-3.40837	0.000653524	0.00580186	Archaea	Crenarchaeota	Nitrososphaeria	Nitrosopumilales	Nitrosopumilaceae	NA	NA
ASV_434	3.31481	-5.24872	1.14895	-4.56826	4.9179e-06	9.76858e-05	Archaea	Crenarchaeota	Nitrososphaeria	Nitrosopumilales	Nitrosopumilaceae	NA	NA
ASV_324	48.3032	-5.16156	1.25032	-4.1282	3.65607e-05	0.000528502	Archaea	Crenarchaeota	Nitrososphaeria	Nitrosopumilales	Nitrosopumilaceae	NA	NA
ASV_4319	2.52687	-5.08789	1.73153	-2.93838	0.00329932	0.020697	Archaea	Crenarchaeota	Nitrososphaeria	Nitrosopumilales	Nitrosopumilaceae	NA	NA
ASV_1178	18.492	-5.02329	1.2647	-3.97194	7.12911e-05	0.000924107	Archaea	Crenarchaeota	Nitrososphaeria	Nitrosopumilales	Nitrosopumilaceae	NA	NA
ASV_894	2.942	-4.74541	1.42846	-3.32203	0.000893638	0.00747678	Archaea	Crenarchaeota	Nitrososphaeria	Nitrosopumilales	Nitrosopumilaceae	NA	NA
ASV_5392	1.95157	-4.71642	1.58706	-2.97179	0.00296067	0.0191887	Archaea	Crenarchaeota	Nitrososphaeria	Nitrosopumilales	Nitrosopumilaceae	NA	NA
ASV_940	2.05477	-4.55217	1.25631	-3.62344	0.000290713	0.0030289	Archaea	Crenarchaeota	Nitrososphaeria	Nitrosopumilales	Nitrosopumilaceae	NA	NA
ASV_2405	1.73919	-4.54313	1.54746	-2.93586	0.00332625	0.0207778	Archaea	Crenarchaeota	Nitrososphaeria	Nitrosopumilales	Nitrosopumilaceae	NA	NA
ASV_37	13.175	-4.04034	1.07283	-3.76607	0.000165837	0.00190782	Archaea	Crenarchaeota	Nitrososphaeria	Nitrosopumilales	Nitrosopumilaceae	NA	NA
ASV_443	2.58791	-3.68046	1.41737	-2.59667	0.0094131	0.0452405	Archaea	Crenarchaeota	Nitrososphaeria	Nitrosopumilales	Nitrosopumilaceae	NA	NA
ASV_1043	1.26096	-3.58912	1.37087	-2.61813	0.00884129	0.0434517	Archaea	Crenarchaeota	Nitrososphaeria	Nitrosopumilales	Nitrosopumilaceae	NA	NA
ASV_493	40.6015	-3.06493	0.694065	-4.41592	1.00582e-05	0.000178017	Archaea	Crenarchaeota	Nitrososphaeria	Nitrosopumilales	Nitrosopumilaceae	NA	NA
ASV_32	59.8424	-3.03768	0.816646	-3.7197	0.000199457	0.00222956	Archaea	Crenarchaeota	Nitrososphaeria	Nitrosopumilales	Nitrosopumilaceae	NA	NA
ASV_551	27.5847	-2.87698	0.845021	-3.40462	0.000662551	0.00580731	Archaea	Crenarchaeota	Nitrososphaeria	Nitrosopumilales	Nitrosopumilaceae	NA	NA
ASV_395	3.69633	-2.71571	0.841393	-3.22763	0.0012482	0.00978867	Archaea	Crenarchaeota	Nitrososphaeria	Nitrosopumilales	Nitrosopumilaceae	NA	NA
ASV_3927	2.18808	-3.84893	1.06604	-3.61049	0.000305614	0.0031368	Bacteria	Acidobacteriota	Acidobacteriae	PAUC26f	NA	NA	NA
ASV_864	3.23309	-5.4414	1.76782	-3.07802	0.00208382	0.0150613	Bacteria	Acidobacteriota	Acidobacteriae	Subgroup_2	NA	NA	NA
ASV_930	2.84247	-3.95662	1.41151	-2.80311	0.00506131	0.028749	Bacteria	Acidobacteriota	Acidobacteriae	Subgroup_2	NA	NA	NA
ASV_1013	2.61741	-5.13739	1.8811	-2.73105	0.00631325	0.0340447	Bacteria	Acidobacteriota	Subgroup_21	NA	NA	NA	NA
ASV_2485	2.24108	-4.91474	1.41513	-3.473	0.000514679	0.00488326	Bacteria	Acidobacteriota	Subgroup_22	NA	NA	NA	NA
ASV_3671	1.85875	-2.93143	1.15005	-2.54895	0.0108047	0.0497197	Bacteria	Acidobacteriota	Subgroup_22	NA	NA	NA	NA
ASV_1980	2.66184	-2.7581	1.036	-2.66225	0.00776197	0.0396133	Bacteria	Acidobacteriota	Subgroup_22	NA	NA	NA	NA
ASV_5678	1.71798	-4.53138	1.7298	-2.6196	0.00880321	0.0434102	Bacteria	Acidobacteriota	Thermoanaerobaculia	Thermoanaerobaculales	Thermoanaerobaculaceae	Subgroup_10	NA
ASV_1777	2.56634	-5.10529	1.49915	-3.40545	0.000660552	0.00580731	Bacteria	Acidobacteriota	Vicinamibacteria	Subgroup_9	NA	NA	NA
ASV_1197	16.5892	-3.63823	0.767134	-4.74263	2.10962e-06	4.44631e-05	Bacteria	Acidobacteriota	Vicinamibacteria	Subgroup_9	NA	NA	NA
ASV_2488	8.83621	-6.89221	1.13693	-6.06214	1.34324e-09	5.79484e-08	Bacteria	Actinobacteriota	Acidimicrobiia	Actinomarinales	NA	NA	NA
ASV_892	2.96429	-5.31693	2.07592	-2.56124	0.0104298	0.0486956	Bacteria	Actinobacteriota	Acidimicrobiia	Actinomarinales	NA	NA	NA
ASV_812	16.7951	-3.27019	1.24427	-2.62819	0.00858405	0.0424741	Bacteria	Actinobacteriota	Acidimicrobiia	Actinomarinales	NA	NA	NA
ASV_7128	1.78804	-4.48006	1.21114	-3.69906	0.000216402	0.00238995	Bacteria	Actinobacteriota	Acidimicrobiia	Microtrichales	Microtrichaceae	Sva0996_marine_group	NA
ASV_7514	1.43944	-4.27724	1.47551	-2.89882	0.00374575	0.0227798	Bacteria	Actinobacteriota	Acidimicrobiia	Microtrichales	Microtrichaceae	Sva0996_marine_group	NA
ASV_6103	2.69783	-5.18094	1.75616	-2.95015	0.00317618	0.0200674	Bacteria	Actinobacteriota	Thermoleophilia	Solirubrobacterales	67-14	NA	NA
ASV_2462	8.37142	-3.84884	1.40253	-2.74421	0.00606568	0.0331134	Bacteria	Bacteroidota	Bacteroidia	Cytophagales	Cyclobacteriaceae	NA	NA
ASV_820	15.8601	-2.69969	0.541363	-4.98685	6.13722e-07	1.44828e-05	Bacteria	Bacteroidota	Bacteroidia	Cytophagales	Cyclobacteriaceae	NA	NA
ASV_1119	12.8103	-2.47154	0.868181	-2.8468	0.00441607	0.0257232	Bacteria	Bacteroidota	Bacteroidia	Cytophagales	Cyclobacteriaceae	NA	NA
ASV_1310	1.47375	-4.30718	1.60653	-2.68104	0.00733947	0.0380908	Bacteria	Bacteroidota	Bacteroidia	Flavobacteriales	Flavobacteriaceae	Aquibacter	NA
ASV_1321	2.47848	-2.41168	0.922257	-2.61497	0.00892353	0.0436841	Bacteria	Bacteroidota	Bacteroidia	Flavobacteriales	Flavobacteriaceae	Lutibacter	NA
ASV_793	2.61509	-5.13446	1.21796	-4.21564	2.49072e-05	0.000386341	Bacteria	Bacteroidota	Bacteroidia	Flavobacteriales	Flavobacteriaceae	NA	NA
ASV_6164	2.20643	-4.88806	1.21528	-4.02216	5.76674e-05	0.000761967	Bacteria	Bacteroidota	Bacteroidia	Flavobacteriales	Flavobacteriaceae	Tenacibaculum	skagerrakense
ASV_1035	1.80334	-3.91608	1.33952	-2.92349	0.00346129	0.0214207	Bacteria	Bacteroidota	Bacteroidia	Flavobacteriales	Flavobacteriaceae	Ulvibacter	NA
ASV_2437	7.42239	-6.63988	1.59683	-4.15815	3.20831e-05	0.000476245	Bacteria	Bacteroidota	Rhodothermia	Rhodothermales	Rhodothermaceae	NA	NA
ASV_1406	3.59643	-4.95234	1.50378	-3.29326	0.000990343	0.00799514	Bacteria	Bacteroidota	Rhodothermia	Rhodothermales	Rhodothermaceae	NA	NA
ASV_8594	1.01992	-3.39759	1.22775	-2.76733	0.00565169	0.0312715	Bacteria	Calditrichota	Calditrichia	Calditrichales	Calditrichaceae	JdFR-76	NA
ASV_3827	4.60487	-2.01857	0.766198	-2.63453	0.00842533	0.0420657	Bacteria	Calditrichota	Calditrichia	Calditrichales	Calditrichaceae	JdFR-76	NA
ASV_1557	9.42105	-1.87325	0.667277	-2.80731	0.00499575	0.0284985	Bacteria	Calditrichota	Calditrichia	Calditrichales	Calditrichaceae	JdFR-76	NA
ASV_1430	2.77976	-5.22363	1.49254	-3.49982	0.00046558	0.00446343	Bacteria	Chloroflexi	Dehalococcoidia	S085	NA	NA	NA
ASV_1702	1.76941	-4.57252	1.59144	-2.8732	0.00406331	0.0241785	Bacteria	Chloroflexi	Dehalococcoidia	SAR202_clade	NA	NA	NA
ASV_1348	1.36879	-4.19718	1.50933	-2.78082	0.00542221	0.0303666	Bacteria	Chloroflexi	Dehalococcoidia	SAR202_clade	NA	NA	NA
ASV_6199	2.37761	-3.87819	1.26348	-3.06946	0.00214443	0.0153388	Bacteria	Chloroflexi	Dehalococcoidia	SAR202_clade	NA	NA	NA
ASV_1331	6.29434	-3.3886	1.14826	-2.95108	0.00316663	0.0200674	Bacteria	Chloroflexi	Dehalococcoidia	SAR202_clade	NA	NA	NA
ASV_1068	4.39447	-3.32464	0.89333	-3.72163	0.000197941	0.00222272	Bacteria	Chloroflexi	Dehalococcoidia	SAR202_clade	NA	NA	NA
ASV_3716	1.73803	-3.27898	1.2711	-2.57963	0.00989055	0.046521	Bacteria	Chloroflexi	Dehalococcoidia	SAR202_clade	NA	NA	NA
ASV_3593	4.62269	-5.9559	0.813114	-7.3248	2.39254e-13	2.75242e-11	Bacteria	Chloroflexi	JG30-KF-CM66	NA	NA	NA	NA
ASV_2973	5.95906	-6.32467	1.54635	-4.09008	4.31231e-05	0.000613727	Bacteria	Dadabacteria	Dadabacteriia	Dadabacteriales	NA	NA	NA
ASV_2472	3.9323	-3.92535	1.14449	-3.42977	0.000604089	0.00548733	Bacteria	Dadabacteria	Dadabacteriia	Dadabacteriales	NA	NA	NA
ASV_1091	18.4006	-3.70275	0.755553	-4.90071	9.54921e-07	2.13789e-05	Bacteria	Dadabacteria	Dadabacteriia	Dadabacteriales	NA	NA	NA
ASV_127	91.038	-2.9501	0.444576	-6.63575	3.22847e-11	2.1741e-09	Bacteria	Dadabacteria	Dadabacteriia	Dadabacteriales	NA	NA	NA
ASV_1127	12.6846	-2.3969	0.649465	-3.69058	0.000223742	0.0024514	Bacteria	Dadabacteria	Dadabacteriia	Dadabacteriales	NA	NA	NA
ASV_529	13.0606	-1.97515	0.675357	-2.9246	0.00344904	0.0213995	Bacteria	Dadabacteria	Dadabacteriia	Dadabacteriales	NA	NA	NA
ASV_5136	1.43867	-3.18151	1.18322	-2.68884	0.00716997	0.0375779	Bacteria	Dependentiae	Babeliae	Babeliales	NA	NA	NA
ASV_616	12.1973	-2.22927	0.5366	-4.15444	3.2608e-05	0.000479956	Bacteria	Firmicutes	NA	NA	NA	NA	NA
ASV_1598	2.54465	-4.4951	1.01235	-4.44027	8.98481e-06	0.000161085	Bacteria	Gemmatimonadota	BD2-11_terrestrial_group	NA	NA	NA	NA
ASV_3328	1.58012	-4.40599	1.7199	-2.56178	0.0104138	0.0486956	Bacteria	Gemmatimonadota	BD2-11_terrestrial_group	NA	NA	NA	NA
ASV_280	10.9097	-2.23644	0.742438	-3.0123	0.00259278	0.0173754	Bacteria	Gemmatimonadota	BD2-11_terrestrial_group	NA	NA	NA	NA
ASV_322	10.5942	-2.05586	0.495704	-4.14735	3.36341e-05	0.000488757	Bacteria	Gemmatimonadota	BD2-11_terrestrial_group	NA	NA	NA	NA
ASV_1945	1.6435	-3.99537	1.23901	-3.22464	0.0012613	0.00979949	Bacteria	Gemmatimonadota	Gemmatimonadetes	Gemmatimonadales	Gemmatimonadaceae	NA	NA
ASV_1727	1.14482	-3.33736	1.23546	-2.7013	0.00690686	0.0366728	Bacteria	Gemmatimonadota	Gemmatimonadetes	Gemmatimonadales	Gemmatimonadaceae	NA	NA
ASV_578	7.39402	-2.68035	1.05031	-2.55197	0.0107116	0.0494562	Bacteria	Gemmatimonadota	Gemmatimonadetes	Gemmatimonadales	Gemmatimonadaceae	NA	NA
ASV_3895	2.01727	-2.50727	0.808864	-3.09974	0.00193691	0.0141852	Bacteria	Gemmatimonadota	Gemmatimonadetes	Gemmatimonadales	Gemmatimonadaceae	NA	NA
ASV_4173	3.25035	-5.45072	1.48554	-3.66918	0.000243328	0.00262859	Bacteria	Gemmatimonadota	PAUC43f_marine_benthic_group	NA	NA	NA	NA
ASV_838	6.24369	-5.44084	1.4954	-3.63837	0.000274369	0.00289135	Bacteria	Gemmatimonadota	PAUC43f_marine_benthic_group	NA	NA	NA	NA
ASV_508	10.5683	-4.60313	1.16339	-3.95665	7.60091e-05	0.000967102	Bacteria	Gemmatimonadota	PAUC43f_marine_benthic_group	NA	NA	NA	NA
ASV_3490	1.14201	-3.69461	1.1393	-3.24286	0.00118335	0.0093661	Bacteria	Latescibacterota	NA	NA	NA	NA	NA
ASV_2207	6.18417	-4.50963	0.899878	-5.01138	5.404e-07	1.29743e-05	Bacteria	NB1-j	NA	NA	NA	NA	NA
ASV_5797	2.60773	-4.47248	1.5054	-2.97096	0.00296868	0.0191956	Bacteria	NB1-j	NA	NA	NA	NA	NA
ASV_6244	1.47795	-4.31416	1.45345	-2.96821	0.00299539	0.019323	Bacteria	NB1-j	NA	NA	NA	NA	NA
ASV_5646	2.17167	-3.8983	1.30393	-2.98964	0.00279306	0.0184489	Bacteria	NB1-j	NA	NA	NA	NA	NA
ASV_2854	1.52648	-3.86553	1.23502	-3.12994	0.00174844	0.0129422	Bacteria	NB1-j	NA	NA	NA	NA	NA
ASV_584	5.22088	-3.16465	0.777316	-4.07125	4.67618e-05	0.000652067	Bacteria	NB1-j	NA	NA	NA	NA	NA
ASV_1835	2.58136	-2.82439	0.998662	-2.82817	0.00468148	0.0270976	Bacteria	NB1-j	NA	NA	NA	NA	NA
ASV_2982	1.86793	-2.67967	1.02966	-2.60247	0.00925538	0.0448644	Bacteria	NB1-j	NA	NA	NA	NA	NA
ASV_265	33.1782	-1.85673	0.565054	-3.28593	0.00101645	0.00818193	Bacteria	NB1-j	NA	NA	NA	NA	NA
ASV_1318	13.8382	-1.751	0.545302	-3.21107	0.00132241	0.0101422	Bacteria	NB1-j	NA	NA	NA	NA	NA
ASV_5108	1.70928	-2.34197	0.888335	-2.63636	0.00838017	0.041916	Bacteria	Nitrospinota	Nitrospinia	Nitrospinales	Nitrospinaceae	LS-NOB	NA
ASV_2753	2.71902	-4.31112	1.14087	-3.77882	0.000157575	0.00183571	Bacteria	Nitrospinota	Nitrospinia	Nitrospinales	Nitrospinaceae	NA	NA
ASV_110	27.9594	-8.35334	0.829098	-10.0752	7.11094e-24	3.27222e-21	Bacteria	Nitrospinota	Nitrospinia	Nitrospinales	Nitrospinaceae	Nitrospina	NA
ASV_882	12.165	-5.48184	0.740594	-7.40195	1.342e-13	1.68421e-11	Bacteria	Nitrospinota	Nitrospinia	Nitrospinales	Nitrospinaceae	Nitrospina	NA
ASV_3076	2.16895	-4.50028	0.820555	-5.48443	4.148e-08	1.3317e-06	Bacteria	Nitrospinota	Nitrospinia	Nitrospinales	Nitrospinaceae	Nitrospina	NA
ASV_5740	1.44538	-4.27857	1.42605	-3.00029	0.00269721	0.0179014	Bacteria	Nitrospinota	Nitrospinia	Nitrospinales	Nitrospinaceae	Nitrospina	NA
ASV_2063	9.098	-3.1204	0.643708	-4.84753	1.25007e-06	2.71768e-05	Bacteria	Nitrospinota	Nitrospinia	Nitrospinales	Nitrospinaceae	Nitrospina	NA
ASV_80	95.0939	-2.90936	0.715272	-4.06749	4.75219e-05	0.000659337	Bacteria	Nitrospinota	Nitrospinia	Nitrospinales	Nitrospinaceae	Nitrospina	NA
ASV_4358	2.74007	-2.7984	0.741442	-3.77427	0.000160476	0.00185593	Bacteria	Nitrospinota	Nitrospinia	Nitrospinales	Nitrospinaceae	Nitrospina	NA
ASV_948	23.6983	-1.84499	0.68621	-2.68867	0.00717372	0.0375779	Bacteria	Nitrospinota	Nitrospinia	Nitrospinales	Nitrospinaceae	Nitrospina	NA
ASV_63	57.6369	-1.60171	0.461668	-3.46939	0.000521647	0.00493243	Bacteria	Nitrospirota	Nitrospiria	Nitrospirales	Nitrospiraceae	Nitrospira	NA
ASV_646	4.97254	-3.58931	1.25949	-2.8498	0.00437463	0.0255356	Bacteria	Planctomycetota	Phycisphaerae	C86	NA	NA	NA
ASV_7720	1.26094	-3.96391	1.49288	-2.65522	0.00792568	0.0402258	Bacteria	Planctomycetota	Pla3_lineage	NA	NA	NA	NA
ASV_4407	1.61526	-4.44355	1.47899	-3.00445	0.00266059	0.017701	Bacteria	Planctomycetota	Planctomycetes	Pirellulales	Pirellulaceae	Pir4_lineage	NA
ASV_4853	2.97888	-2.92556	1.10701	-2.64276	0.00822328	0.0413744	Bacteria	Planctomycetota	Planctomycetes	Pirellulales	Pirellulaceae	Pir4_lineage	NA
ASV_3143	6.43796	-2.35101	0.738381	-3.18401	0.00145252	0.0110176	Bacteria	Planctomycetota	Planctomycetes	Pirellulales	Pirellulaceae	Pir4_lineage	NA
ASV_1499	11.0743	-2.14968	0.702944	-3.05811	0.00222737	0.0157687	Bacteria	Planctomycetota	Planctomycetes	Pirellulales	Pirellulaceae	Pir4_lineage	NA
ASV_6742	1.49914	-3.50497	1.35669	-2.58348	0.00978095	0.0464007	Bacteria	Planctomycetota	vadinHA49	NA	NA	NA	NA
ASV_796	13.6446	-3.15253	0.864824	-3.64529	0.000267093	0.00282545	Bacteria	Proteobacteria	Alphaproteobacteria	AT-s3-44	NA	NA	NA
ASV_1679	4.15052	-5.69556	1.57503	-3.61616	0.000299009	0.003092	Bacteria	Proteobacteria	Alphaproteobacteria	Defluviicoccales	NA	NA	NA
ASV_1337	5.33567	-5.64251	0.955985	-5.9023	3.58471e-09	1.4344e-07	Bacteria	Proteobacteria	Alphaproteobacteria	Defluviicoccales	NA	NA	NA
ASV_1526	1.92909	-4.57925	1.50271	-3.04734	0.00230878	0.0161495	Bacteria	Proteobacteria	Alphaproteobacteria	Defluviicoccales	NA	NA	NA
ASV_708	3.00645	-4.17111	1.46319	-2.85069	0.00436245	0.025521	Bacteria	Proteobacteria	Alphaproteobacteria	Defluviicoccales	NA	NA	NA
ASV_2341	10.3484	-4.91308	1.15657	-4.24796	2.15727e-05	0.000346292	Bacteria	Proteobacteria	Alphaproteobacteria	Kiloniellales	Kiloniellaceae	NA	NA
ASV_6368	2.34603	-3.10911	1.09066	-2.85066	0.00436287	0.025521	Bacteria	Proteobacteria	Alphaproteobacteria	Kiloniellales	Kiloniellaceae	NA	NA
ASV_2442	5.26787	-2.38412	0.649844	-3.66877	0.000243723	0.00262859	Bacteria	Proteobacteria	Alphaproteobacteria	Kiloniellales	Kiloniellaceae	NA	NA
ASV_2119	5.33167	-2.62354	0.9817	-2.67245	0.00752995	0.0386486	Bacteria	Proteobacteria	Alphaproteobacteria	Kiloniellales	Kiloniellaceae	Pelagibius	NA
ASV_4650	2.07581	-4.68935	1.75576	-2.67083	0.00756638	0.0387584	Bacteria	Proteobacteria	Alphaproteobacteria	NA	NA	NA	NA
ASV_4334	1.79486	-4.11327	1.08703	-3.78393	0.000154369	0.00180599	Bacteria	Proteobacteria	Alphaproteobacteria	NA	NA	NA	NA
ASV_3696	6.37728	-3.91903	1.19381	-3.28279	0.00102786	0.00822584	Bacteria	Proteobacteria	Alphaproteobacteria	Parvibaculales	PS1_clade	NA	NA
ASV_781	33.1949	-2.46357	0.740461	-3.32707	0.00087764	0.00736524	Bacteria	Proteobacteria	Alphaproteobacteria	Rhizobiales	Methyloligellaceae	Methyloceanibacter	NA
ASV_7163	1.98853	-3.09062	1.18392	-2.6105	0.00904108	0.0441032	Bacteria	Proteobacteria	Alphaproteobacteria	Rhizobiales	Methyloligellaceae	NA	NA
ASV_2838	5.17914	-2.49668	0.94419	-2.64426	0.00818704	0.0413244	Bacteria	Proteobacteria	Alphaproteobacteria	Rhizobiales	Methyloligellaceae	NA	NA
ASV_7401	1.77402	-4.57935	1.58674	-2.886	0.0039017	0.0235724	Bacteria	Proteobacteria	Alphaproteobacteria	Rhodobacterales	Rhodobacteraceae	Actibacterium	NA
ASV_2724	3.44576	-5.31969	1.23669	-4.30156	1.69604e-05	0.000274002	Bacteria	Proteobacteria	Alphaproteobacteria	Rhodobacterales	Rhodobacteraceae	Limibaculum	NA
ASV_6926	1.66212	-4.36984	1.17903	-3.70629	0.00021032	0.0023321	Bacteria	Proteobacteria	Alphaproteobacteria	Rhodobacterales	Rhodobacteraceae	NA	NA
ASV_5367	1.60805	-3.81333	1.25397	-3.04101	0.00235783	0.0162751	Bacteria	Proteobacteria	Alphaproteobacteria	Rhodobacterales	Rhodobacteraceae	NA	NA
ASV_2477	5.80578	-2.29096	0.816539	-2.80569	0.0050209	0.0285829	Bacteria	Proteobacteria	Alphaproteobacteria	Rhodobacterales	Rhodobacteraceae	NA	NA
ASV_410	9.3807	-6.97937	1.36186	-5.1249	2.97701e-07	7.61066e-06	Bacteria	Proteobacteria	Alphaproteobacteria	Rhodobacterales	Rhodobacteraceae	Pseudooceanicola	nanhaiensis
ASV_6264	0.888681	-3.25516	1.25708	-2.58947	0.00961246	0.0458376	Bacteria	Proteobacteria	Alphaproteobacteria	Rhodobacterales	Rhodobacteraceae	Roseobacter_clade_NAC11-7_lineage	NA
ASV_658	13.6795	-2.29192	0.761132	-3.0112	0.00260221	0.0173964	Bacteria	Proteobacteria	Alphaproteobacteria	Rhodobacterales	Rhodobacteraceae	Roseobacter_clade_NAC11-7_lineage	NA
ASV_1657	16.6173	-6.00248	1.14664	-5.23484	1.65128e-07	4.42638e-06	Bacteria	Proteobacteria	Alphaproteobacteria	Rhodospirillales	Magnetospiraceae	NA	NA
ASV_3365	1.36474	-3.24299	1.27074	-2.55206	0.0107089	0.0494562	Bacteria	Proteobacteria	Alphaproteobacteria	Rhodospirillales	Magnetospiraceae	NA	NA
ASV_690	39.1278	-3.06921	1.14462	-2.68143	0.00733087	0.0380908	Bacteria	Proteobacteria	Alphaproteobacteria	Rhodospirillales	Magnetospiraceae	NA	NA
ASV_294	53.0485	-1.9673	0.694576	-2.83238	0.00462033	0.0267998	Bacteria	Proteobacteria	Alphaproteobacteria	Rhodospirillales	Magnetospiraceae	NA	NA
ASV_5701	2.37549	-4.11081	1.48286	-2.77222	0.00556757	0.0309921	Bacteria	Proteobacteria	Alphaproteobacteria	Tistrellales	Geminicoccaceae	NA	NA
ASV_4500	1.47596	-4.31513	1.0003	-4.31385	1.60434e-05	0.000265244	Bacteria	Proteobacteria	Gammaproteobacteria	BD7-8	NA	NA	NA
ASV_2560	3.05071	-3.68467	1.33096	-2.76842	0.00563284	0.0312715	Bacteria	Proteobacteria	Gammaproteobacteria	BD7-8	NA	NA	NA
ASV_1510	4.06765	-3.52638	1.22187	-2.88604	0.00390117	0.0235724	Bacteria	Proteobacteria	Gammaproteobacteria	BD7-8	NA	NA	NA
ASV_3609	2.9373	-3.22163	0.980676	-3.28511	0.00101941	0.00818193	Bacteria	Proteobacteria	Gammaproteobacteria	BD7-8	NA	NA	NA
ASV_925	4.37258	-5.77054	1.08031	-5.34157	9.21466e-08	2.65017e-06	Bacteria	Proteobacteria	Gammaproteobacteria	Burkholderiales	Burkholderiaceae	Ralstonia	NA
ASV_23	76.1437	-3.61328	0.643014	-5.61928	1.91751e-08	6.7875e-07	Bacteria	Proteobacteria	Gammaproteobacteria	Burkholderiales	Burkholderiaceae	Ralstonia	NA
ASV_2696	4.01106	-5.75431	1.28609	-4.47427	7.66724e-06	0.000144995	Bacteria	Proteobacteria	Gammaproteobacteria	Burkholderiales	Nitrosomonadaceae	Nitrosomonas	NA
ASV_1363	8.12884	-4.51765	0.847564	-5.33015	9.81312e-08	2.78851e-06	Bacteria	Proteobacteria	Gammaproteobacteria	Burkholderiales	Nitrosomonadaceae	Nitrosomonas	NA
ASV_1562	6.57928	-3.51775	1.10898	-3.17205	0.00151368	0.0113877	Bacteria	Proteobacteria	Gammaproteobacteria	Burkholderiales	Nitrosomonadaceae	Nitrosomonas	NA
ASV_3058	4.98634	-6.06638	1.78825	-3.39236	0.000692941	0.00601639	Bacteria	Proteobacteria	Gammaproteobacteria	Cellvibrionales	Spongiibacteraceae	NA	NA
ASV_7437	2.12547	-4.83531	1.72706	-2.79974	0.00511442	0.0288582	Bacteria	Proteobacteria	Gammaproteobacteria	Cellvibrionales	Spongiibacteraceae	NA	NA
ASV_2455	1.25661	-2.87405	1.07784	-2.6665	0.00766462	0.0391889	Bacteria	Proteobacteria	Gammaproteobacteria	EPR3968-O8a-Bc78	NA	NA	NA
ASV_253	11.7357	-4.53805	1.26647	-3.58322	0.000339382	0.00339505	Bacteria	Proteobacteria	Gammaproteobacteria	JTB23	NA	NA	NA
ASV_46	38.3735	-2.12124	0.43891	-4.83297	1.34513e-06	2.90149e-05	Bacteria	Proteobacteria	Gammaproteobacteria	JTB23	NA	NA	NA
ASV_70	90.2719	-1.70859	0.345045	-4.95179	7.35353e-07	1.69192e-05	Bacteria	Proteobacteria	Gammaproteobacteria	JTB23	NA	NA	NA
ASV_3493	1.3667	-4.1929	1.46861	-2.855	0.00430365	0.0253356	Bacteria	Proteobacteria	Gammaproteobacteria	KI89A_clade	NA	NA	NA
ASV_238	6.22384	-5.64439	1.35904	-4.15323	3.27822e-05	0.000479956	Bacteria	Proteobacteria	Gammaproteobacteria	MBMPE27	NA	NA	NA
ASV_105	45.8371	-1.75028	0.54878	-3.1894	0.0014257	0.010844	Bacteria	Proteobacteria	Gammaproteobacteria	NA	NA	NA	NA
ASV_1322	7.93633	-6.73823	1.06056	-6.35347	2.10513e-10	1.21089e-08	Bacteria	Proteobacteria	Gammaproteobacteria	Nitrosococcales	Nitrosococcaceae	AqS1	NA
ASV_5452	2.47446	-4.2539	1.50737	-2.82207	0.00477143	0.0274457	Bacteria	Proteobacteria	Gammaproteobacteria	Nitrosococcales	Nitrosococcaceae	AqS1	NA
ASV_73	40.0917	-8.77409	1.42589	-6.15343	7.58264e-10	3.37672e-08	Bacteria	Proteobacteria	Gammaproteobacteria	Oceanospirillales	Alcanivoracaceae1	Alcanivorax	venustensis
ASV_2002	7.03796	-5.04093	1.25134	-4.02844	5.61477e-05	0.000749065	Bacteria	Proteobacteria	Gammaproteobacteria	Oceanospirillales	Kangiellaceae	NA	NA
ASV_2450	6.66642	-4.84661	1.34876	-3.59339	0.000326407	0.00328909	Bacteria	Proteobacteria	Gammaproteobacteria	Oceanospirillales	Kangiellaceae	NA	NA
ASV_3578	2.62557	-2.74882	0.956294	-2.87445	0.00404727	0.0241785	Bacteria	Proteobacteria	Gammaproteobacteria	Oceanospirillales	Kangiellaceae	NA	NA
ASV_583	4.53172	-2.01404	0.683986	-2.94457	0.00323409	0.0203866	Bacteria	Proteobacteria	Gammaproteobacteria	Oceanospirillales	Kangiellaceae	NA	NA
ASV_6544	1.89877	-4.45297	1.19655	-3.7215	0.00019804	0.00222272	Bacteria	Proteobacteria	Gammaproteobacteria	Oceanospirillales	Pseudohongiellaceae	Pseudohongiella	NA
ASV_506	5.04165	-5.97666	1.58939	-3.76034	0.00016968	0.0019359	Bacteria	Proteobacteria	Gammaproteobacteria	Steroidobacterales	Woeseiaceae	Woeseia	NA
ASV_459	3.9136	-5.71807	1.77464	-3.2221	0.00127254	0.00984166	Bacteria	Proteobacteria	Gammaproteobacteria	Steroidobacterales	Woeseiaceae	Woeseia	NA
ASV_1021	2.76125	-5.21383	1.61667	-3.22503	0.00125958	0.00979949	Bacteria	Proteobacteria	Gammaproteobacteria	Steroidobacterales	Woeseiaceae	Woeseia	NA
ASV_556	2.25821	-3.83039	1.33032	-2.87929	0.00398568	0.0239749	Bacteria	Proteobacteria	Gammaproteobacteria	Steroidobacterales	Woeseiaceae	Woeseia	NA
ASV_6882	2.0691	-3.77452	1.10053	-3.42973	0.000604183	0.00548733	Bacteria	Proteobacteria	Gammaproteobacteria	Steroidobacterales	Woeseiaceae	Woeseia	NA
ASV_4280	0.920075	-3.50789	1.1856	-2.95874	0.00308896	0.0197133	Bacteria	Proteobacteria	Gammaproteobacteria	Steroidobacterales	Woeseiaceae	Woeseia	NA
ASV_3000	1.08798	-3.23839	1.1044	-2.93226	0.00336508	0.0209685	Bacteria	Proteobacteria	Gammaproteobacteria	Steroidobacterales	Woeseiaceae	Woeseia	NA
ASV_2740	1.16362	-2.43748	0.946082	-2.57639	0.00998372	0.0468793	Bacteria	Proteobacteria	Gammaproteobacteria	Steroidobacterales	Woeseiaceae	Woeseia	NA
ASV_77	47.9922	-2.0637	0.379669	-5.43552	5.4638e-08	1.67617e-06	Bacteria	Proteobacteria	Gammaproteobacteria	Steroidobacterales	Woeseiaceae	Woeseia	NA
ASV_308	28.841	-1.97994	0.366138	-5.40762	6.38682e-08	1.91674e-06	Bacteria	Proteobacteria	Gammaproteobacteria	Steroidobacterales	Woeseiaceae	Woeseia	NA
ASV_881	25.0718	-1.9565	0.608625	-3.21462	0.00130617	0.0100455	Bacteria	Proteobacteria	Gammaproteobacteria	Steroidobacterales	Woeseiaceae	Woeseia	NA
ASV_5982	1.35274	-3.9396	1.39782	-2.81839	0.00482644	0.0276469	Bacteria	Proteobacteria	Gammaproteobacteria	Xanthomonadales	Rhodanobacteraceae	NA	NA
ASV_1405	10.7616	-24.3566	2.16219	-11.2648	1.95854e-29	2.70376e-26	Bacteria	SAR324_clade(Marine_group_B)	NA	NA	NA	NA	NA
ASV_1109	8.246	-6.79193	1.99188	-3.40981	0.000650091	0.00579001	Bacteria	SAR324_clade(Marine_group_B)	NA	NA	NA	NA	NA
ASV_2645	6.84087	-6.52306	1.33134	-4.89963	9.60155e-07	2.13789e-05	Bacteria	SAR324_clade(Marine_group_B)	NA	NA	NA	NA	NA
ASV_3385	6.56246	-6.46295	2.11037	-3.06247	0.00219518	0.0156208	Bacteria	SAR324_clade(Marine_group_B)	NA	NA	NA	NA	NA
ASV_2417	3.61298	-5.60289	1.93093	-2.90166	0.00371195	0.022624	Bacteria	SAR324_clade(Marine_group_B)	NA	NA	NA	NA	NA
ASV_1847	3.17141	-5.41454	1.7585	-3.07907	0.00207646	0.0150475	Bacteria	SAR324_clade(Marine_group_B)	NA	NA	NA	NA	NA
ASV_3579	2.53688	-5.09231	1.48589	-3.42712	0.000610023	0.00552221	Bacteria	SAR324_clade(Marine_group_B)	NA	NA	NA	NA	NA
ASV_469	41.2132	-2.20864	0.788096	-2.80249	0.00507091	0.028749	Bacteria	SAR324_clade(Marine_group_B)	NA	NA	NA	NA	NA

## Sheet: nodules vs water
Enriched in nodules
	baseMean	log2FoldChange	lfcSE	stat	pvalue	padj	Kingdom	Phylum	Class	Order	Family	Genus	Species
ASV_85	60.4105	1.60866	0.260253	6.18113	6.36437e-10	9.38021e-09	Archaea	Crenarchaeota	Nitrososphaeria	Nitrosopumilales	Nitrosopumilaceae	Candidatus_Nitrosopumilus	NA
ASV_1188	5.03829	1.62449	0.469629	3.45909	0.000541999	0.00390227	Archaea	Crenarchaeota	Nitrososphaeria	Nitrosopumilales	Nitrosopumilaceae	Candidatus_Nitrosopumilus	NA
ASV_2091	3.5548	1.67242	0.504419	3.31555	0.000914642	0.00627713	Archaea	Crenarchaeota	Nitrososphaeria	Nitrosopumilales	Nitrosopumilaceae	Candidatus_Nitrosopumilus	NA
ASV_5972	1.79839	1.67242	0.434941	3.84518	0.000120465	0.000977942	Archaea	Crenarchaeota	Nitrososphaeria	Nitrosopumilales	Nitrosopumilaceae	Candidatus_Nitrosopumilus	NA
ASV_194	33.3647	1.69854	0.363409	4.67391	2.95522e-06	3.01741e-05	Archaea	Crenarchaeota	Nitrososphaeria	Nitrosopumilales	Nitrosopumilaceae	Candidatus_Nitrosopumilus	NA
ASV_1823	3.75073	1.71882	0.595108	2.88824	0.00387399	0.0232402	Archaea	Crenarchaeota	Nitrososphaeria	Nitrosopumilales	Nitrosopumilaceae	Candidatus_Nitrosopumilus	NA
ASV_5362	2.25324	1.72218	0.479904	3.58859	0.000332476	0.00250193	Archaea	Crenarchaeota	Nitrososphaeria	Nitrosopumilales	Nitrosopumilaceae	Candidatus_Nitrosopumilus	NA
ASV_2830	2.02231	1.74595	0.461875	3.78014	0.000156739	0.00124391	Archaea	Crenarchaeota	Nitrososphaeria	Nitrosopumilales	Nitrosopumilaceae	Candidatus_Nitrosopumilus	NA
ASV_755	7.75337	1.7672	0.499318	3.53924	0.000401288	0.00297121	Archaea	Crenarchaeota	Nitrososphaeria	Nitrosopumilales	Nitrosopumilaceae	Candidatus_Nitrosopumilus	NA
ASV_6617	1.91735	1.77259	0.478587	3.7038	0.000212395	0.001648	Archaea	Crenarchaeota	Nitrososphaeria	Nitrosopumilales	Nitrosopumilaceae	Candidatus_Nitrosopumilus	NA
ASV_1008	1.82638	1.78136	0.514389	3.46306	0.000534073	0.00384816	Archaea	Crenarchaeota	Nitrososphaeria	Nitrosopumilales	Nitrosopumilaceae	Candidatus_Nitrosopumilus	NA
ASV_1191	7.76037	1.78346	0.468388	3.80765	0.000140294	0.00112146	Archaea	Crenarchaeota	Nitrososphaeria	Nitrosopumilales	Nitrosopumilaceae	Candidatus_Nitrosopumilus	NA
ASV_2695	4.07262	1.79843	0.405631	4.43367	9.26422e-06	8.81674e-05	Archaea	Crenarchaeota	Nitrososphaeria	Nitrosopumilales	Nitrosopumilaceae	Candidatus_Nitrosopumilus	NA
ASV_309	26.521	1.80576	0.474339	3.80689	0.000140723	0.00112441	Archaea	Crenarchaeota	Nitrososphaeria	Nitrosopumilales	Nitrosopumilaceae	Candidatus_Nitrosopumilus	NA
ASV_6834	1.88936	1.85798	0.484706	3.83321	0.000126483	0.00102015	Archaea	Crenarchaeota	Nitrososphaeria	Nitrosopumilales	Nitrosopumilaceae	Candidatus_Nitrosopumilus	NA
ASV_1473	6.33985	1.88332	0.521772	3.60948	0.000306817	0.0023249	Archaea	Crenarchaeota	Nitrososphaeria	Nitrosopumilales	Nitrosopumilaceae	Candidatus_Nitrosopumilus	NA
ASV_263	19.2365	1.90689	0.499423	3.81819	0.000134436	0.00107969	Archaea	Crenarchaeota	Nitrososphaeria	Nitrosopumilales	Nitrosopumilaceae	Candidatus_Nitrosopumilus	NA
ASV_1225	2.37919	1.92283	0.551649	3.4856	0.000491028	0.00357089	Archaea	Crenarchaeota	Nitrososphaeria	Nitrosopumilales	Nitrosopumilaceae	Candidatus_Nitrosopumilus	NA
ASV_1789	5.45115	1.92283	0.565623	3.39949	0.000675113	0.00477461	Archaea	Crenarchaeota	Nitrososphaeria	Nitrosopumilales	Nitrosopumilaceae	Candidatus_Nitrosopumilus	NA
ASV_2293	4.96132	1.92283	0.549582	3.49871	0.000467506	0.00340775	Archaea	Crenarchaeota	Nitrososphaeria	Nitrosopumilales	Nitrosopumilaceae	Candidatus_Nitrosopumilus	NA
ASV_5496	2.00832	1.94642	0.441043	4.41322	1.01847e-05	9.62443e-05	Archaea	Crenarchaeota	Nitrososphaeria	Nitrosopumilales	Nitrosopumilaceae	Candidatus_Nitrosopumilus	NA
ASV_1883	2.01532	1.96193	0.486787	4.03037	5.56884e-05	0.000474402	Archaea	Crenarchaeota	Nitrososphaeria	Nitrosopumilales	Nitrosopumilaceae	Candidatus_Nitrosopumilus	NA
ASV_182	31.3564	1.97894	0.414928	4.76935	1.84822e-06	1.9323e-05	Archaea	Crenarchaeota	Nitrososphaeria	Nitrosopumilales	Nitrosopumilaceae	Candidatus_Nitrosopumilus	NA
ASV_3964	2.58212	2.01978	0.487422	4.1438	3.41605e-05	0.000299874	Archaea	Crenarchaeota	Nitrososphaeria	Nitrosopumilales	Nitrosopumilaceae	Candidatus_Nitrosopumilus	NA
ASV_1419	7.34751	2.03709	0.521267	3.90796	9.30796e-05	0.000766224	Archaea	Crenarchaeota	Nitrososphaeria	Nitrosopumilales	Nitrosopumilaceae	Candidatus_Nitrosopumilus	NA
ASV_162	38.1581	2.05166	0.520587	3.94106	8.11238e-05	0.000673414	Archaea	Crenarchaeota	Nitrososphaeria	Nitrosopumilales	Nitrosopumilaceae	Candidatus_Nitrosopumilus	NA
ASV_1992	2.34421	2.0605	0.490733	4.19881	2.68321e-05	0.000239462	Archaea	Crenarchaeota	Nitrososphaeria	Nitrosopumilales	Nitrosopumilaceae	Candidatus_Nitrosopumilus	NA
ASV_1156	8.07526	2.07325	0.596417	3.47617	0.000508628	0.00368319	Archaea	Crenarchaeota	Nitrososphaeria	Nitrosopumilales	Nitrosopumilaceae	Candidatus_Nitrosopumilus	NA
ASV_5343	2.26723	2.13614	0.490015	4.35932	1.30465e-05	0.000121034	Archaea	Crenarchaeota	Nitrososphaeria	Nitrosopumilales	Nitrosopumilaceae	Candidatus_Nitrosopumilus	NA
ASV_1112	9.4538	2.13688	0.401673	5.31995	1.03796e-07	1.24694e-06	Archaea	Crenarchaeota	Nitrososphaeria	Nitrosopumilales	Nitrosopumilaceae	Candidatus_Nitrosopumilus	NA
ASV_1770	3.14893	2.16546	0.468416	4.62295	3.78316e-06	3.79671e-05	Archaea	Crenarchaeota	Nitrososphaeria	Nitrosopumilales	Nitrosopumilaceae	Candidatus_Nitrosopumilus	NA
ASV_2062	3.73673	2.20294	0.571317	3.8559	0.000115306	0.00093727	Archaea	Crenarchaeota	Nitrososphaeria	Nitrosopumilales	Nitrosopumilaceae	Candidatus_Nitrosopumilus	NA
ASV_36	98.4006	2.20399	0.393538	5.60046	2.1378e-08	2.73629e-07	Archaea	Crenarchaeota	Nitrososphaeria	Nitrosopumilales	Nitrosopumilaceae	Candidatus_Nitrosopumilus	NA
ASV_3243	3.64576	2.21594	0.508783	4.35536	1.32846e-05	0.000123122	Archaea	Crenarchaeota	Nitrososphaeria	Nitrosopumilales	Nitrosopumilaceae	Candidatus_Nitrosopumilus	NA
ASV_816	8.69105	2.23706	0.383416	5.83455	5.39375e-09	7.3337e-08	Archaea	Crenarchaeota	Nitrososphaeria	Nitrosopumilales	Nitrosopumilaceae	Candidatus_Nitrosopumilus	NA
ASV_1608	5.48614	2.2658	0.524542	4.31957	1.5633e-05	0.000143791	Archaea	Crenarchaeota	Nitrososphaeria	Nitrosopumilales	Nitrosopumilaceae	Candidatus_Nitrosopumilus	NA
ASV_779	11.693	2.3382	0.48314	4.83959	1.30106e-06	1.38179e-05	Archaea	Crenarchaeota	Nitrososphaeria	Nitrosopumilales	Nitrosopumilaceae	Candidatus_Nitrosopumilus	NA
ASV_2055	5.17824	2.37697	0.592025	4.01498	5.94517e-05	0.000504439	Archaea	Crenarchaeota	Nitrososphaeria	Nitrosopumilales	Nitrosopumilaceae	Candidatus_Nitrosopumilus	NA
ASV_1203	8.28519	2.39803	0.539456	4.44527	8.77812e-06	8.36684e-05	Archaea	Crenarchaeota	Nitrososphaeria	Nitrosopumilales	Nitrosopumilaceae	Candidatus_Nitrosopumilus	NA
ASV_1963	4.86335	2.41504	0.497253	4.85676	1.19322e-06	1.26941e-05	Archaea	Crenarchaeota	Nitrososphaeria	Nitrosopumilales	Nitrosopumilaceae	Candidatus_Nitrosopumilus	NA
ASV_1051	4.76538	2.49389	0.556855	4.47852	7.51616e-06	7.25236e-05	Archaea	Crenarchaeota	Nitrososphaeria	Nitrosopumilales	Nitrosopumilaceae	Candidatus_Nitrosopumilus	NA
ASV_4144	2.6451	2.49719	0.512169	4.87571	1.0842e-06	1.16133e-05	Archaea	Crenarchaeota	Nitrososphaeria	Nitrosopumilales	Nitrosopumilaceae	Candidatus_Nitrosopumilus	NA
ASV_2977	4.14959	2.5025	0.544091	4.59941	4.2369e-06	4.22722e-05	Archaea	Crenarchaeota	Nitrososphaeria	Nitrosopumilales	Nitrosopumilaceae	Candidatus_Nitrosopumilus	NA
ASV_406	18.5367	2.507	0.492085	5.09465	3.49392e-07	3.98332e-06	Archaea	Crenarchaeota	Nitrososphaeria	Nitrosopumilales	Nitrosopumilaceae	Candidatus_Nitrosopumilus	NA
ASV_1487	6.7737	2.53534	0.479089	5.29201	1.20982e-07	1.44325e-06	Archaea	Crenarchaeota	Nitrososphaeria	Nitrosopumilales	Nitrosopumilaceae	Candidatus_Nitrosopumilus	NA
ASV_3376	3.35886	2.5597	0.465856	5.49461	3.91586e-08	4.8791e-07	Archaea	Crenarchaeota	Nitrososphaeria	Nitrosopumilales	Nitrosopumilaceae	Candidatus_Nitrosopumilus	NA
ASV_952	10.5104	2.64427	0.393856	6.71381	1.89609e-11	3.14236e-10	Archaea	Crenarchaeota	Nitrososphaeria	Nitrosopumilales	Nitrosopumilaceae	Candidatus_Nitrosopumilus	NA
ASV_742	10.6994	2.66396	0.355053	7.50301	6.23681e-14	1.23013e-12	Archaea	Crenarchaeota	Nitrososphaeria	Nitrosopumilales	Nitrosopumilaceae	Candidatus_Nitrosopumilus	NA
ASV_1314	7.78836	2.68489	0.425446	6.31077	2.77652e-10	4.24205e-09	Archaea	Crenarchaeota	Nitrososphaeria	Nitrosopumilales	Nitrosopumilaceae	Candidatus_Nitrosopumilus	NA
ASV_1696	6.52879	2.6892	0.534044	5.03554	4.76507e-07	5.33217e-06	Archaea	Crenarchaeota	Nitrososphaeria	Nitrosopumilales	Nitrosopumilaceae	Candidatus_Nitrosopumilus	NA
ASV_392	12.9456	2.6977	0.596295	4.52411	6.06513e-06	5.9346e-05	Archaea	Crenarchaeota	Nitrososphaeria	Nitrosopumilales	Nitrosopumilaceae	Candidatus_Nitrosopumilus	NA
ASV_1224	7.20756	2.75387	0.493697	5.57807	2.43203e-08	3.09182e-07	Archaea	Crenarchaeota	Nitrososphaeria	Nitrosopumilales	Nitrosopumilaceae	Candidatus_Nitrosopumilus	NA
ASV_78	50.8937	2.77614	0.247974	11.1953	4.30113e-29	1.84811e-27	Archaea	Crenarchaeota	Nitrososphaeria	Nitrosopumilales	Nitrosopumilaceae	Candidatus_Nitrosopumilus	NA
ASV_3787	3.06496	2.80305	0.487471	5.75019	8.91418e-09	1.18879e-07	Archaea	Crenarchaeota	Nitrososphaeria	Nitrosopumilales	Nitrosopumilaceae	Candidatus_Nitrosopumilus	NA
ASV_2555	3.44283	2.80831	0.50125	5.60261	2.11149e-08	2.70447e-07	Archaea	Crenarchaeota	Nitrososphaeria	Nitrosopumilales	Nitrosopumilaceae	Candidatus_Nitrosopumilus	NA
ASV_2240	4.80737	2.87856	0.473581	6.07829	1.21473e-09	1.75184e-08	Archaea	Crenarchaeota	Nitrososphaeria	Nitrosopumilales	Nitrosopumilaceae	Candidatus_Nitrosopumilus	NA
ASV_108	36.0308	2.94251	0.548625	5.36343	8.16553e-08	9.8855e-07	Archaea	Crenarchaeota	Nitrososphaeria	Nitrosopumilales	Nitrosopumilaceae	Candidatus_Nitrosopumilus	NA
ASV_605	15.3458	3.01495	0.456506	6.60441	3.99111e-11	6.45487e-10	Archaea	Crenarchaeota	Nitrososphaeria	Nitrosopumilales	Nitrosopumilaceae	Candidatus_Nitrosopumilus	NA
ASV_1123	6.38883	3.05025	0.468457	6.51128	7.45147e-11	1.18207e-09	Archaea	Crenarchaeota	Nitrososphaeria	Nitrosopumilales	Nitrosopumilaceae	Candidatus_Nitrosopumilus	NA
ASV_623	13.7993	3.06905	0.441388	6.95319	3.57128e-12	6.20332e-11	Archaea	Crenarchaeota	Nitrososphaeria	Nitrosopumilales	Nitrosopumilaceae	Candidatus_Nitrosopumilus	NA
ASV_803	7.3825	3.07681	0.586869	5.24276	1.58193e-07	1.87053e-06	Archaea	Crenarchaeota	Nitrososphaeria	Nitrosopumilales	Nitrosopumilaceae	Candidatus_Nitrosopumilus	NA
ASV_3	272.817	3.09708	0.318238	9.73197	2.20292e-22	6.96368e-21	Archaea	Crenarchaeota	Nitrososphaeria	Nitrosopumilales	Nitrosopumilaceae	Candidatus_Nitrosopumilus	NA
ASV_47	50.5439	3.10154	0.690121	4.49419	6.98351e-06	6.77321e-05	Archaea	Crenarchaeota	Nitrososphaeria	Nitrosopumilales	Nitrosopumilaceae	Candidatus_Nitrosopumilus	NA
ASV_1892	4.69541	3.13614	0.581934	5.38916	7.07863e-08	8.64209e-07	Archaea	Crenarchaeota	Nitrososphaeria	Nitrosopumilales	Nitrosopumilaceae	Candidatus_Nitrosopumilus	NA
ASV_565	15.1988	3.14296	0.565702	5.55585	2.76263e-08	3.48381e-07	Archaea	Crenarchaeota	Nitrososphaeria	Nitrosopumilales	Nitrosopumilaceae	Candidatus_Nitrosopumilus	NA
ASV_1592	4.21257	3.18982	0.517077	6.16895	6.87456e-10	1.00925e-08	Archaea	Crenarchaeota	Nitrososphaeria	Nitrosopumilales	Nitrosopumilaceae	Candidatus_Nitrosopumilus	NA
ASV_2265	4.4365	3.19311	0.52931	6.03259	1.61352e-09	2.30046e-08	Archaea	Crenarchaeota	Nitrososphaeria	Nitrosopumilales	Nitrosopumilaceae	Candidatus_Nitrosopumilus	NA
ASV_532	12.6797	3.20165	0.454622	7.04244	1.88899e-12	3.35569e-11	Archaea	Crenarchaeota	Nitrososphaeria	Nitrosopumilales	Nitrosopumilaceae	Candidatus_Nitrosopumilus	NA
ASV_1024	7.83734	3.20294	0.565939	5.65951	1.51801e-08	1.97668e-07	Archaea	Crenarchaeota	Nitrososphaeria	Nitrosopumilales	Nitrosopumilaceae	Candidatus_Nitrosopumilus	NA
ASV_1506	6.26288	3.27333	0.480914	6.80648	1.00017e-11	1.68282e-10	Archaea	Crenarchaeota	Nitrososphaeria	Nitrosopumilales	Nitrosopumilaceae	Candidatus_Nitrosopumilus	NA
ASV_2215	4.63243	3.29155	0.57798	5.69492	1.23427e-08	1.61617e-07	Archaea	Crenarchaeota	Nitrososphaeria	Nitrosopumilales	Nitrosopumilaceae	Candidatus_Nitrosopumilus	NA
ASV_2270	4.33853	3.29462	0.521193	6.32131	2.59355e-10	3.9852e-09	Archaea	Crenarchaeota	Nitrososphaeria	Nitrosopumilales	Nitrosopumilaceae	Candidatus_Nitrosopumilus	NA
ASV_2166	4.60444	3.3837	0.478975	7.06447	1.61227e-12	2.86682e-11	Archaea	Crenarchaeota	Nitrososphaeria	Nitrosopumilales	Nitrosopumilaceae	Candidatus_Nitrosopumilus	NA
ASV_518	19.2855	3.55126	0.52846	6.72002	1.81703e-11	3.01665e-10	Archaea	Crenarchaeota	Nitrososphaeria	Nitrosopumilales	Nitrosopumilaceae	Candidatus_Nitrosopumilus	NA
ASV_771	12.4838	3.55969	0.515862	6.90049	5.18253e-12	8.91955e-11	Archaea	Crenarchaeota	Nitrososphaeria	Nitrosopumilales	Nitrosopumilaceae	Candidatus_Nitrosopumilus	NA
ASV_1204	7.76737	3.5627	0.570807	6.24152	4.33351e-10	6.49923e-09	Archaea	Crenarchaeota	Nitrososphaeria	Nitrosopumilales	Nitrosopumilaceae	Candidatus_Nitrosopumilus	NA
ASV_2009	5.94798	3.61798	0.459727	7.86984	3.55088e-15	7.6026e-14	Archaea	Crenarchaeota	Nitrososphaeria	Nitrosopumilales	Nitrosopumilaceae	Candidatus_Nitrosopumilus	NA
ASV_1618	6.28387	3.67624	0.57443	6.3998	1.55582e-10	2.42036e-09	Archaea	Crenarchaeota	Nitrososphaeria	Nitrosopumilales	Nitrosopumilaceae	Candidatus_Nitrosopumilus	NA
ASV_1194	7.46647	3.6892	0.582143	6.33728	2.33859e-10	3.60819e-09	Archaea	Crenarchaeota	Nitrososphaeria	Nitrosopumilales	Nitrosopumilaceae	Candidatus_Nitrosopumilus	NA
ASV_764	13.8203	3.77917	0.487804	7.74732	9.38541e-15	1.95594e-13	Archaea	Crenarchaeota	Nitrososphaeria	Nitrosopumilales	Nitrosopumilaceae	Candidatus_Nitrosopumilus	NA
ASV_1076	10.4964	3.79405	0.483368	7.84921	4.18661e-15	8.92305e-14	Archaea	Crenarchaeota	Nitrososphaeria	Nitrosopumilales	Nitrosopumilaceae	Candidatus_Nitrosopumilus	NA
ASV_2039	5.5981	3.8223	0.482965	7.91424	2.48759e-15	5.3566e-14	Archaea	Crenarchaeota	Nitrososphaeria	Nitrosopumilales	Nitrosopumilaceae	Candidatus_Nitrosopumilus	NA
ASV_2169	5.66808	3.8371	0.497147	7.71824	1.1795e-14	2.43111e-13	Archaea	Crenarchaeota	Nitrososphaeria	Nitrosopumilales	Nitrosopumilaceae	Candidatus_Nitrosopumilus	NA
ASV_1523	6.64075	3.8413	0.496679	7.73396	1.04248e-14	2.16294e-13	Archaea	Crenarchaeota	Nitrososphaeria	Nitrosopumilales	Nitrosopumilaceae	Candidatus_Nitrosopumilus	NA
ASV_729	13.2745	3.88699	0.455626	8.5311	1.44964e-17	3.59101e-16	Archaea	Crenarchaeota	Nitrososphaeria	Nitrosopumilales	Nitrosopumilaceae	Candidatus_Nitrosopumilus	NA
ASV_1300	9.35583	3.97537	0.6151	6.46296	1.02675e-10	1.61603e-09	Archaea	Crenarchaeota	Nitrososphaeria	Nitrosopumilales	Nitrosopumilaceae	Candidatus_Nitrosopumilus	NA
ASV_1581	6.34685	4.01309	0.504967	7.94722	1.90736e-15	4.1404e-14	Archaea	Crenarchaeota	Nitrososphaeria	Nitrosopumilales	Nitrosopumilaceae	Candidatus_Nitrosopumilus	NA
ASV_640	9.67072	4.03526	0.471068	8.56619	1.06963e-17	2.67792e-16	Archaea	Crenarchaeota	Nitrososphaeria	Nitrosopumilales	Nitrosopumilaceae	Candidatus_Nitrosopumilus	NA
ASV_846	14.0652	4.11278	0.629229	6.53623	6.3089e-11	1.00648e-09	Archaea	Crenarchaeota	Nitrososphaeria	Nitrosopumilales	Nitrosopumilaceae	Candidatus_Nitrosopumilus	NA
ASV_504	15.4997	4.11548	0.450392	9.13755	6.38824e-20	1.81745e-18	Archaea	Crenarchaeota	Nitrososphaeria	Nitrosopumilales	Nitrosopumilaceae	Candidatus_Nitrosopumilus	NA
ASV_31	89.5556	4.13671	0.40423	10.2335	1.40291e-24	5.05612e-23	Archaea	Crenarchaeota	Nitrososphaeria	Nitrosopumilales	Nitrosopumilaceae	Candidatus_Nitrosopumilus	NA
ASV_333	25.0025	4.21932	0.43528	9.69335	3.21789e-22	1.00704e-20	Archaea	Crenarchaeota	Nitrososphaeria	Nitrosopumilales	Nitrosopumilaceae	Candidatus_Nitrosopumilus	NA
ASV_706	15.3318	4.24793	0.52966	8.0201	1.0566e-15	2.33135e-14	Archaea	Crenarchaeota	Nitrososphaeria	Nitrosopumilales	Nitrosopumilaceae	Candidatus_Nitrosopumilus	NA
ASV_1005	10.6434	4.26053	0.468583	9.09236	9.69157e-20	2.72832e-18	Archaea	Crenarchaeota	Nitrososphaeria	Nitrosopumilales	Nitrosopumilaceae	Candidatus_Nitrosopumilus	NA
ASV_1380	7.40349	4.27612	0.504175	8.48143	2.22446e-17	5.44572e-16	Archaea	Crenarchaeota	Nitrososphaeria	Nitrosopumilales	Nitrosopumilaceae	Candidatus_Nitrosopumilus	NA
ASV_367	18.6557	4.36048	0.520919	8.37074	5.72564e-17	1.37131e-15	Archaea	Crenarchaeota	Nitrososphaeria	Nitrosopumilales	Nitrosopumilaceae	Candidatus_Nitrosopumilus	NA
ASV_218	33.3857	4.38514	0.573536	7.6458	2.07658e-14	4.20625e-13	Archaea	Crenarchaeota	Nitrososphaeria	Nitrosopumilales	Nitrosopumilaceae	Candidatus_Nitrosopumilus	NA
ASV_404	24.4847	4.47869	0.540666	8.28365	1.19454e-16	2.80024e-15	Archaea	Crenarchaeota	Nitrososphaeria	Nitrosopumilales	Nitrosopumilaceae	Candidatus_Nitrosopumilus	NA
ASV_261	29.467	4.57743	0.448919	10.1965	2.05444e-24	7.26481e-23	Archaea	Crenarchaeota	Nitrososphaeria	Nitrosopumilales	Nitrosopumilaceae	Candidatus_Nitrosopumilus	NA
ASV_710	13.9323	4.69465	0.587616	7.98931	1.35698e-15	2.97316e-14	Archaea	Crenarchaeota	Nitrososphaeria	Nitrosopumilales	Nitrosopumilaceae	Candidatus_Nitrosopumilus	NA
ASV_968	12.7917	4.88569	0.572256	8.5376	1.37036e-17	3.41716e-16	Archaea	Crenarchaeota	Nitrososphaeria	Nitrosopumilales	Nitrosopumilaceae	Candidatus_Nitrosopumilus	NA
ASV_912	12.0709	4.89583	0.48687	10.0557	8.66867e-24	2.93812e-22	Archaea	Crenarchaeota	Nitrososphaeria	Nitrosopumilales	Nitrosopumilaceae	Candidatus_Nitrosopumilus	NA
ASV_383	20.8179	4.90403	0.479609	10.2251	1.53108e-24	5.48645e-23	Archaea	Crenarchaeota	Nitrososphaeria	Nitrosopumilales	Nitrosopumilaceae	Candidatus_Nitrosopumilus	NA
ASV_55	82.579	4.90508	0.483472	10.1455	3.46845e-24	1.19939e-22	Archaea	Crenarchaeota	Nitrososphaeria	Nitrosopumilales	Nitrosopumilaceae	Candidatus_Nitrosopumilus	NA
ASV_321	23.7919	5.05257	0.696093	7.25846	3.91511e-13	7.35141e-12	Archaea	Crenarchaeota	Nitrososphaeria	Nitrosopumilales	Nitrosopumilaceae	Candidatus_Nitrosopumilus	NA
ASV_203	40.1314	5.10476	0.483147	10.5656	4.30021e-26	1.62792e-24	Archaea	Crenarchaeota	Nitrososphaeria	Nitrosopumilales	Nitrosopumilaceae	Candidatus_Nitrosopumilus	NA
ASV_1	556.521	5.11646	0.300739	17.0129	6.58573e-65	7.87645e-63	Archaea	Crenarchaeota	Nitrososphaeria	Nitrosopumilales	Nitrosopumilaceae	Candidatus_Nitrosopumilus	NA
ASV_54	73.2512	5.12015	0.503631	10.1665	2.79858e-24	9.76745e-23	Archaea	Crenarchaeota	Nitrososphaeria	Nitrosopumilales	Nitrosopumilaceae	Candidatus_Nitrosopumilus	NA
ASV_2	409.095	5.28367	0.29817	17.7203	2.92356e-70	3.94933e-68	Archaea	Crenarchaeota	Nitrososphaeria	Nitrosopumilales	Nitrosopumilaceae	Candidatus_Nitrosopumilus	NA
ASV_464	23.1412	5.35315	0.524302	10.21	1.78801e-24	6.38278e-23	Archaea	Crenarchaeota	Nitrososphaeria	Nitrosopumilales	Nitrosopumilaceae	Candidatus_Nitrosopumilus	NA
ASV_201	45.1277	5.52537	0.599136	9.22223	2.90996e-20	8.43215e-19	Archaea	Crenarchaeota	Nitrososphaeria	Nitrosopumilales	Nitrosopumilaceae	Candidatus_Nitrosopumilus	NA
ASV_7	158.293	5.5715	0.290031	19.2101	3.04942e-82	5.55911e-80	Archaea	Crenarchaeota	Nitrososphaeria	Nitrosopumilales	Nitrosopumilaceae	Candidatus_Nitrosopumilus	NA
ASV_164	40.8102	5.59249	0.455163	12.2868	1.06667e-34	5.77199e-33	Archaea	Crenarchaeota	Nitrososphaeria	Nitrosopumilales	Nitrosopumilaceae	Candidatus_Nitrosopumilus	NA
ASV_363	24.0998	5.68517	0.483077	11.7687	5.66143e-32	2.73277e-30	Archaea	Crenarchaeota	Nitrososphaeria	Nitrosopumilales	Nitrosopumilaceae	Candidatus_Nitrosopumilus	NA
ASV_214	30.9575	5.74464	0.49177	11.6815	1.58394e-31	7.52954e-30	Archaea	Crenarchaeota	Nitrososphaeria	Nitrosopumilales	Nitrosopumilaceae	Candidatus_Nitrosopumilus	NA
ASV_338	23.9739	5.75933	0.537517	10.7147	8.6845e-27	3.40436e-25	Archaea	Crenarchaeota	Nitrososphaeria	Nitrosopumilales	Nitrosopumilaceae	Candidatus_Nitrosopumilus	NA
ASV_113	47.08	6.11721	0.512389	11.9386	7.44643e-33	3.77896e-31	Archaea	Crenarchaeota	Nitrososphaeria	Nitrosopumilales	Nitrosopumilaceae	Candidatus_Nitrosopumilus	NA
ASV_38	112.025	6.18599	0.469725	13.1694	1.31652e-39	8.52424e-38	Archaea	Crenarchaeota	Nitrososphaeria	Nitrosopumilales	Nitrosopumilaceae	Candidatus_Nitrosopumilus	NA
ASV_133	49.2283	6.44589	0.434481	14.8358	8.59189e-50	7.13849e-48	Archaea	Crenarchaeota	Nitrososphaeria	Nitrosopumilales	Nitrosopumilaceae	Candidatus_Nitrosopumilus	NA
ASV_33	129.169	6.68105	0.388598	17.1927	3.01094e-66	3.7691e-64	Archaea	Crenarchaeota	Nitrososphaeria	Nitrosopumilales	Nitrosopumilaceae	Candidatus_Nitrosopumilus	NA
ASV_81	70.3751	7.1523	0.498524	14.347	1.11303e-46	8.35972e-45	Archaea	Crenarchaeota	Nitrososphaeria	Nitrosopumilales	Nitrosopumilaceae	Candidatus_Nitrosopumilus	NA
ASV_807	8.38316	1.64546	0.521946	3.15255	0.00161853	0.0105415	Archaea	Crenarchaeota	Nitrososphaeria	Nitrosopumilales	Nitrosopumilaceae	NA	NA
ASV_1362	5.75905	1.67242	0.540919	3.09182	0.00198933	0.0127053	Archaea	Crenarchaeota	Nitrososphaeria	Nitrosopumilales	Nitrosopumilaceae	NA	NA
ASV_443	17.2142	1.71882	0.490589	3.50358	0.000459052	0.00335133	Archaea	Crenarchaeota	Nitrososphaeria	Nitrosopumilales	Nitrosopumilaceae	NA	NA
ASV_1262	7.45947	1.72792	0.468771	3.68606	0.000227752	0.00175987	Archaea	Crenarchaeota	Nitrososphaeria	Nitrosopumilales	Nitrosopumilaceae	NA	NA
ASV_672	15.3038	1.76377	0.474094	3.72028	0.000199	0.00155175	Archaea	Crenarchaeota	Nitrososphaeria	Nitrosopumilales	Nitrosopumilaceae	NA	NA
ASV_879	13.7573	1.77552	0.635232	2.79507	0.00518887	0.0301272	Archaea	Crenarchaeota	Nitrososphaeria	Nitrosopumilales	Nitrosopumilaceae	NA	NA
ASV_517	13.0226	1.78136	0.507513	3.50998	0.000448146	0.00328576	Archaea	Crenarchaeota	Nitrososphaeria	Nitrosopumilales	Nitrosopumilaceae	NA	NA
ASV_5392	1.87536	1.8413	0.468924	3.92665	8.61361e-05	0.000711874	Archaea	Crenarchaeota	Nitrososphaeria	Nitrosopumilales	Nitrosopumilaceae	NA	NA
ASV_2586	4.67442	1.84967	0.543896	3.40077	0.000671956	0.00475587	Archaea	Crenarchaeota	Nitrososphaeria	Nitrosopumilales	Nitrosopumilaceae	NA	NA
ASV_402	11.4691	1.86396	0.63938	2.91526	0.00355396	0.0214851	Archaea	Crenarchaeota	Nitrososphaeria	Nitrosopumilales	Nitrosopumilaceae	NA	NA
ASV_1512	5.22723	1.86625	0.549614	3.39556	0.000684876	0.00484183	Archaea	Crenarchaeota	Nitrososphaeria	Nitrosopumilales	Nitrosopumilaceae	NA	NA
ASV_1745	6.85068	1.89885	0.596949	3.18093	0.00146803	0.00964494	Archaea	Crenarchaeota	Nitrososphaeria	Nitrosopumilales	Nitrosopumilaceae	NA	NA
ASV_894	9.49578	1.89885	0.585368	3.24386	0.00117921	0.00790506	Archaea	Crenarchaeota	Nitrososphaeria	Nitrosopumilales	Nitrosopumilaceae	NA	NA
ASV_395	22.7213	1.91528	0.459226	4.17067	3.037e-05	0.00026899	Archaea	Crenarchaeota	Nitrososphaeria	Nitrosopumilales	Nitrosopumilaceae	NA	NA
ASV_448	15.4438	1.92283	0.567284	3.38954	0.000700103	0.00491985	Archaea	Crenarchaeota	Nitrososphaeria	Nitrosopumilales	Nitrosopumilaceae	NA	NA
ASV_895	10.5734	1.9386	0.477709	4.05811	4.94706e-05	0.00042379	Archaea	Crenarchaeota	Nitrososphaeria	Nitrosopumilales	Nitrosopumilaceae	NA	NA
ASV_4663	2.16227	1.96193	0.498036	3.93934	8.17066e-05	0.000677952	Archaea	Crenarchaeota	Nitrososphaeria	Nitrosopumilales	Nitrosopumilaceae	NA	NA
ASV_652	8.35517	1.96882	0.591355	3.32933	0.000870548	0.00600966	Archaea	Crenarchaeota	Nitrososphaeria	Nitrosopumilales	Nitrosopumilaceae	NA	NA
ASV_1434	5.38118	1.98489	0.485474	4.08857	4.34041e-05	0.000375403	Archaea	Crenarchaeota	Nitrososphaeria	Nitrosopumilales	Nitrosopumilaceae	NA	NA
ASV_302	20.0062	2.01495	0.489474	4.11656	3.84561e-05	0.000335233	Archaea	Crenarchaeota	Nitrososphaeria	Nitrosopumilales	Nitrosopumilaceae	NA	NA
ASV_788	11.0912	2.02237	0.52978	3.81737	0.000134882	0.0010826	Archaea	Crenarchaeota	Nitrososphaeria	Nitrosopumilales	Nitrosopumilaceae	NA	NA
ASV_1342	6.00396	2.02975	0.525849	3.85994	0.000113413	0.000922285	Archaea	Crenarchaeota	Nitrososphaeria	Nitrosopumilales	Nitrosopumilaceae	NA	NA
ASV_434	12.0709	2.06728	0.679435	3.04265	0.00234502	0.0147909	Archaea	Crenarchaeota	Nitrososphaeria	Nitrosopumilales	Nitrosopumilaceae	NA	NA
ASV_4319	2.11328	2.10154	0.491728	4.27378	1.92184e-05	0.000174612	Archaea	Crenarchaeota	Nitrososphaeria	Nitrosopumilales	Nitrosopumilaceae	NA	NA
ASV_6149	2.13428	2.10852	0.49716	4.24114	2.22389e-05	0.000200182	Archaea	Crenarchaeota	Nitrososphaeria	Nitrosopumilales	Nitrosopumilaceae	NA	NA
ASV_396	23.7499	2.13614	0.527007	4.05333	5.04928e-05	0.000431938	Archaea	Crenarchaeota	Nitrososphaeria	Nitrosopumilales	Nitrosopumilaceae	NA	NA
ASV_1559	7.83035	2.14296	0.565367	3.79039	0.000150414	0.00119931	Archaea	Crenarchaeota	Nitrososphaeria	Nitrosopumilales	Nitrosopumilaceae	NA	NA
ASV_4909	2.63111	2.16992	0.504612	4.30019	1.70654e-05	0.00015631	Archaea	Crenarchaeota	Nitrososphaeria	Nitrosopumilales	Nitrosopumilaceae	NA	NA
ASV_289	11.4971	2.2658	0.600661	3.77218	0.00016183	0.00128063	Archaea	Crenarchaeota	Nitrososphaeria	Nitrosopumilales	Nitrosopumilaceae	NA	NA
ASV_305	24.3447	2.29768	0.477411	4.81279	1.48836e-06	1.57625e-05	Archaea	Crenarchaeota	Nitrososphaeria	Nitrosopumilales	Nitrosopumilaceae	NA	NA
ASV_1552	4.90534	2.30985	0.563228	4.1011	4.11193e-05	0.000357287	Archaea	Crenarchaeota	Nitrososphaeria	Nitrosopumilales	Nitrosopumilaceae	NA	NA
ASV_650	15.3528	2.32193	0.461081	5.03583	4.75773e-07	5.32713e-06	Archaea	Crenarchaeota	Nitrososphaeria	Nitrosopumilales	Nitrosopumilaceae	NA	NA
ASV_5514	2.3652	2.3339	0.497677	4.68959	2.73752e-06	2.80888e-05	Archaea	Crenarchaeota	Nitrososphaeria	Nitrosopumilales	Nitrosopumilaceae	NA	NA
ASV_617	13.4424	2.35755	0.501216	4.70366	2.55538e-06	2.63495e-05	Archaea	Crenarchaeota	Nitrososphaeria	Nitrosopumilales	Nitrosopumilaceae	NA	NA
ASV_1675	7.18656	2.3634	0.617147	3.82956	0.000128371	0.00103363	Archaea	Crenarchaeota	Nitrososphaeria	Nitrosopumilales	Nitrosopumilaceae	NA	NA
ASV_1354	6.90666	2.3634	0.566368	4.17291	3.0073e-05	0.00026661	Archaea	Crenarchaeota	Nitrososphaeria	Nitrosopumilales	Nitrosopumilaceae	NA	NA
ASV_370	18.6977	2.37504	0.627044	3.78767	0.000152065	0.00120988	Archaea	Crenarchaeota	Nitrososphaeria	Nitrosopumilales	Nitrosopumilaceae	NA	NA
ASV_3575	3.48482	2.40372	0.559426	4.29676	1.73312e-05	0.00015859	Archaea	Crenarchaeota	Nitrososphaeria	Nitrosopumilales	Nitrosopumilaceae	NA	NA
ASV_3060	2.44917	2.40372	0.503827	4.77092	1.83385e-06	1.91834e-05	Archaea	Crenarchaeota	Nitrososphaeria	Nitrosopumilales	Nitrosopumilaceae	NA	NA
ASV_5132	2.54014	2.41504	0.500966	4.82076	1.43013e-06	1.51544e-05	Archaea	Crenarchaeota	Nitrososphaeria	Nitrosopumilales	Nitrosopumilaceae	NA	NA
ASV_642	13.8203	2.44267	0.428909	5.69507	1.23319e-08	1.61589e-07	Archaea	Crenarchaeota	Nitrososphaeria	Nitrosopumilales	Nitrosopumilaceae	NA	NA
ASV_497	7.02562	2.44846	0.607515	4.03028	5.57094e-05	0.000474402	Archaea	Crenarchaeota	Nitrososphaeria	Nitrosopumilales	Nitrosopumilaceae	NA	NA
ASV_1452	6.64775	2.49185	0.49957	4.988	6.10083e-07	6.73854e-06	Archaea	Crenarchaeota	Nitrososphaeria	Nitrosopumilales	Nitrosopumilaceae	NA	NA
ASV_1754	5.57711	2.51667	0.496236	5.07151	3.94674e-07	4.48053e-06	Archaea	Crenarchaeota	Nitrososphaeria	Nitrosopumilales	Nitrosopumilaceae	NA	NA
ASV_4747	2.70808	2.59991	0.526471	4.93838	7.87762e-07	8.59489e-06	Archaea	Crenarchaeota	Nitrososphaeria	Nitrosopumilales	Nitrosopumilaceae	NA	NA
ASV_445	19.4044	2.61961	0.45097	5.80883	6.29096e-09	8.49822e-08	Archaea	Crenarchaeota	Nitrososphaeria	Nitrosopumilales	Nitrosopumilaceae	NA	NA
ASV_1455	7.50146	2.62936	0.528732	4.97294	6.59437e-07	7.24956e-06	Archaea	Crenarchaeota	Nitrososphaeria	Nitrosopumilales	Nitrosopumilaceae	NA	NA
ASV_3068	3.98165	2.63904	0.507776	5.19725	2.02255e-07	2.36766e-06	Archaea	Crenarchaeota	Nitrososphaeria	Nitrosopumilales	Nitrosopumilaceae	NA	NA
ASV_4074	3.12094	2.68182	0.516676	5.19053	2.09694e-07	2.45017e-06	Archaea	Crenarchaeota	Nitrososphaeria	Nitrosopumilales	Nitrosopumilaceae	NA	NA
ASV_298	24.0648	2.73954	0.671386	4.08042	4.49534e-05	0.000387909	Archaea	Crenarchaeota	Nitrososphaeria	Nitrosopumilales	Nitrosopumilaceae	NA	NA
ASV_510	20.2441	2.76376	0.551657	5.00993	5.44497e-07	6.05329e-06	Archaea	Crenarchaeota	Nitrososphaeria	Nitrosopumilales	Nitrosopumilaceae	NA	NA
ASV_1442	6.39583	2.87036	0.515645	5.56655	2.5983e-08	3.28984e-07	Archaea	Crenarchaeota	Nitrososphaeria	Nitrosopumilales	Nitrosopumilaceae	NA	NA
ASV_251	27.1438	2.88583	0.436258	6.61495	3.71676e-11	6.02153e-10	Archaea	Crenarchaeota	Nitrososphaeria	Nitrosopumilales	Nitrosopumilaceae	NA	NA
ASV_3810	3.26089	2.94642	0.486101	6.06133	1.35e-09	1.94097e-08	Archaea	Crenarchaeota	Nitrososphaeria	Nitrosopumilales	Nitrosopumilaceae	NA	NA
ASV_3693	3.33787	2.98868	0.479554	6.23221	4.59892e-10	6.87532e-09	Archaea	Crenarchaeota	Nitrososphaeria	Nitrosopumilales	Nitrosopumilaceae	NA	NA
ASV_619	9.19488	2.99246	0.672148	4.4521	8.50364e-06	8.13827e-05	Archaea	Crenarchaeota	Nitrososphaeria	Nitrosopumilales	Nitrosopumilaceae	NA	NA
ASV_244	24.9675	2.99624	0.544518	5.50255	3.7434e-08	4.66781e-07	Archaea	Crenarchaeota	Nitrososphaeria	Nitrosopumilales	Nitrosopumilaceae	NA	NA
ASV_138	29.1241	3.03301	0.542413	5.5917	2.24852e-08	2.86824e-07	Archaea	Crenarchaeota	Nitrososphaeria	Nitrosopumilales	Nitrosopumilaceae	NA	NA
ASV_186	31.6363	3.03342	0.530554	5.71747	1.08124e-08	1.42473e-07	Archaea	Crenarchaeota	Nitrososphaeria	Nitrosopumilales	Nitrosopumilaceae	NA	NA
ASV_242	9.55176	3.07794	0.566495	5.4333	5.53207e-08	6.82047e-07	Archaea	Crenarchaeota	Nitrososphaeria	Nitrosopumilales	Nitrosopumilaceae	NA	NA
ASV_296	26.9129	3.13271	0.570704	5.48921	4.03731e-08	5.02709e-07	Archaea	Crenarchaeota	Nitrososphaeria	Nitrosopumilales	Nitrosopumilaceae	NA	NA
ASV_372	15.2478	3.14636	0.48863	6.43913	1.20157e-10	1.88487e-09	Archaea	Crenarchaeota	Nitrososphaeria	Nitrosopumilales	Nitrosopumilaceae	NA	NA
ASV_3475	3.65276	3.14975	0.507811	6.2026	5.55383e-10	8.21783e-09	Archaea	Crenarchaeota	Nitrososphaeria	Nitrosopumilales	Nitrosopumilaceae	NA	NA
ASV_1920	3.79271	3.21594	0.525852	6.11567	9.61521e-10	1.39849e-08	Archaea	Crenarchaeota	Nitrososphaeria	Nitrosopumilales	Nitrosopumilaceae	NA	NA
ASV_376	19.6144	3.31892	0.610806	5.43367	5.52072e-08	6.81094e-07	Archaea	Crenarchaeota	Nitrososphaeria	Nitrosopumilales	Nitrosopumilaceae	NA	NA
ASV_763	9.11091	3.3837	0.644903	5.24684	1.54731e-07	1.83189e-06	Archaea	Crenarchaeota	Nitrososphaeria	Nitrosopumilales	Nitrosopumilaceae	NA	NA
ASV_1678	6.7877	3.39232	0.566616	5.98698	2.13777e-09	3.00906e-08	Archaea	Crenarchaeota	Nitrososphaeria	Nitrosopumilales	Nitrosopumilaceae	NA	NA
ASV_37	55.2253	3.46879	0.551257	6.2925	3.12396e-10	4.73818e-09	Archaea	Crenarchaeota	Nitrososphaeria	Nitrosopumilales	Nitrosopumilaceae	NA	NA
ASV_456	15.7797	3.5025	0.645562	5.4255	5.77923e-08	7.10652e-07	Archaea	Crenarchaeota	Nitrososphaeria	Nitrosopumilales	Nitrosopumilaceae	NA	NA
ASV_2562	4.96132	3.51043	0.517516	6.78323	1.17518e-11	1.96845e-10	Archaea	Crenarchaeota	Nitrososphaeria	Nitrosopumilales	Nitrosopumilaceae	NA	NA
ASV_2316	5.45815	3.52878	0.561465	6.28495	3.27962e-10	4.96225e-09	Archaea	Crenarchaeota	Nitrososphaeria	Nitrosopumilales	Nitrosopumilaceae	NA	NA
ASV_2737	4.61843	3.55459	0.491938	7.22568	4.98615e-13	9.27899e-12	Archaea	Crenarchaeota	Nitrososphaeria	Nitrosopumilales	Nitrosopumilaceae	NA	NA
ASV_2664	4.75139	3.60239	0.542297	6.64283	3.07724e-11	5.0201e-10	Archaea	Crenarchaeota	Nitrososphaeria	Nitrosopumilales	Nitrosopumilaceae	NA	NA
ASV_550	14.2612	3.74642	0.472161	7.93463	2.1113e-15	4.56727e-14	Archaea	Crenarchaeota	Nitrososphaeria	Nitrosopumilales	Nitrosopumilaceae	NA	NA
ASV_123	50.3059	3.7879	0.485114	7.80827	5.79785e-15	1.22597e-13	Archaea	Crenarchaeota	Nitrososphaeria	Nitrosopumilales	Nitrosopumilaceae	NA	NA
ASV_11	81.2844	3.80445	0.555179	6.85265	7.24924e-12	1.23185e-10	Archaea	Crenarchaeota	Nitrososphaeria	Nitrosopumilales	Nitrosopumilaceae	NA	NA
ASV_991	10.6364	3.98489	0.54937	7.25357	4.05931e-13	7.61456e-12	Archaea	Crenarchaeota	Nitrososphaeria	Nitrosopumilales	Nitrosopumilaceae	NA	NA
ASV_292	23.8619	4.01612	0.567039	7.08262	1.41453e-12	2.52478e-11	Archaea	Crenarchaeota	Nitrososphaeria	Nitrosopumilales	Nitrosopumilaceae	NA	NA
ASV_1183	9.78268	4.07681	0.572255	7.12412	1.04744e-12	1.89844e-11	Archaea	Crenarchaeota	Nitrososphaeria	Nitrosopumilales	Nitrosopumilaceae	NA	NA
ASV_980	10.7763	4.16491	0.593296	7.01994	2.2196e-12	3.90604e-11	Archaea	Crenarchaeota	Nitrososphaeria	Nitrosopumilales	Nitrosopumilaceae	NA	NA
ASV_1178	7.98429	4.3634	0.5943	7.34209	2.10291e-13	4.04159e-12	Archaea	Crenarchaeota	Nitrososphaeria	Nitrosopumilales	Nitrosopumilaceae	NA	NA
ASV_569	13.1625	4.42346	0.518365	8.53349	1.42001e-17	3.52227e-16	Archaea	Crenarchaeota	Nitrososphaeria	Nitrosopumilales	Nitrosopumilaceae	NA	NA
ASV_209	37.8782	4.61348	0.458181	10.0691	7.56488e-24	2.57796e-22	Archaea	Crenarchaeota	Nitrososphaeria	Nitrosopumilales	Nitrosopumilaceae	NA	NA
ASV_272	27.4517	4.67242	0.469108	9.96023	2.27538e-23	7.54855e-22	Archaea	Crenarchaeota	Nitrososphaeria	Nitrosopumilales	Nitrosopumilaceae	NA	NA
ASV_271	25.8632	4.73132	0.684129	6.91582	4.65149e-12	8.02766e-11	Archaea	Crenarchaeota	Nitrososphaeria	Nitrosopumilales	Nitrosopumilaceae	NA	NA
ASV_312	28.2914	4.74371	0.651593	7.28017	3.33392e-13	6.30422e-12	Archaea	Crenarchaeota	Nitrososphaeria	Nitrosopumilales	Nitrosopumilaceae	NA	NA
ASV_163	38.9138	4.99341	0.649782	7.68475	1.53298e-14	3.13901e-13	Archaea	Crenarchaeota	Nitrososphaeria	Nitrosopumilales	Nitrosopumilaceae	NA	NA
ASV_368	25.3734	5.01216	0.537584	9.32349	1.12577e-20	3.32367e-19	Archaea	Crenarchaeota	Nitrososphaeria	Nitrosopumilales	Nitrosopumilaceae	NA	NA
ASV_654	11.658	5.03158	0.60699	8.28941	1.13816e-16	2.6781e-15	Archaea	Crenarchaeota	Nitrososphaeria	Nitrosopumilales	Nitrosopumilaceae	NA	NA
ASV_551	14.737	5.0325	0.57042	8.82245	1.11984e-18	2.94087e-17	Archaea	Crenarchaeota	Nitrososphaeria	Nitrosopumilales	Nitrosopumilaceae	NA	NA
ASV_145	41.433	5.04461	0.444849	11.34	8.31092e-30	3.68052e-28	Archaea	Crenarchaeota	Nitrososphaeria	Nitrosopumilales	Nitrosopumilaceae	NA	NA
ASV_829	14.4571	5.10901	0.550405	9.28227	1.65905e-20	4.86748e-19	Archaea	Crenarchaeota	Nitrososphaeria	Nitrosopumilales	Nitrosopumilaceae	NA	NA
ASV_323	29.1171	5.19475	0.574752	9.03825	1.59199e-19	4.42202e-18	Archaea	Crenarchaeota	Nitrososphaeria	Nitrosopumilales	Nitrosopumilaceae	NA	NA
ASV_72	68.5628	5.38442	0.537389	10.0196	1.25002e-23	4.19136e-22	Archaea	Crenarchaeota	Nitrososphaeria	Nitrosopumilales	Nitrosopumilaceae	NA	NA
ASV_189	35.7999	5.42206	0.482774	11.2311	2.87022e-29	1.24755e-27	Archaea	Crenarchaeota	Nitrososphaeria	Nitrosopumilales	Nitrosopumilaceae	NA	NA
ASV_159	42.2727	5.53527	0.470371	11.7679	5.71343e-32	2.7508e-30	Archaea	Crenarchaeota	Nitrososphaeria	Nitrosopumilales	Nitrosopumilaceae	NA	NA
ASV_30	108.659	5.55069	0.406988	13.6385	2.36481e-42	1.6446e-40	Archaea	Crenarchaeota	Nitrososphaeria	Nitrosopumilales	Nitrosopumilaceae	NA	NA
ASV_493	17.1652	5.56097	0.558923	9.94943	2.53627e-23	8.39923e-22	Archaea	Crenarchaeota	Nitrososphaeria	Nitrosopumilales	Nitrosopumilaceae	NA	NA
ASV_68	61.6911	5.60733	0.488539	11.4778	1.70658e-30	7.77778e-29	Archaea	Crenarchaeota	Nitrososphaeria	Nitrosopumilales	Nitrosopumilaceae	NA	NA
ASV_13	156.656	5.71898	0.486292	11.7604	6.24603e-32	2.99953e-30	Archaea	Crenarchaeota	Nitrososphaeria	Nitrosopumilales	Nitrosopumilaceae	NA	NA
ASV_324	20.0412	5.84914	0.605355	9.66234	4.35806e-22	1.34813e-20	Archaea	Crenarchaeota	Nitrososphaeria	Nitrosopumilales	Nitrosopumilaceae	NA	NA
ASV_29	121.339	5.90622	0.458905	12.8703	6.61783e-38	3.98279e-36	Archaea	Crenarchaeota	Nitrososphaeria	Nitrosopumilales	Nitrosopumilaceae	NA	NA
ASV_75	65.4418	6.1014	0.482494	12.6455	1.18415e-36	6.71747e-35	Archaea	Crenarchaeota	Nitrososphaeria	Nitrosopumilales	Nitrosopumilaceae	NA	NA
ASV_32	91.326	6.20375	0.544903	11.3851	4.96303e-30	2.21356e-28	Archaea	Crenarchaeota	Nitrososphaeria	Nitrosopumilales	Nitrosopumilaceae	NA	NA
ASV_119	56.3099	6.5304	0.432645	15.0941	1.76974e-51	1.56011e-49	Archaea	Crenarchaeota	Nitrososphaeria	Nitrosopumilales	Nitrosopumilaceae	NA	NA
ASV_142	52.9511	6.63541	0.442261	15.0034	6.9763e-51	6.09275e-49	Archaea	Crenarchaeota	Nitrososphaeria	Nitrosopumilales	Nitrosopumilaceae	NA	NA
ASV_58	79.8989	6.6901	0.506627	13.2052	8.19032e-40	5.37726e-38	Archaea	Crenarchaeota	Nitrososphaeria	Nitrosopumilales	Nitrosopumilaceae	NA	NA
ASV_21	156.964	6.74911	0.443962	15.202	3.42948e-52	3.06644e-50	Archaea	Crenarchaeota	Nitrososphaeria	Nitrosopumilales	Nitrosopumilaceae	NA	NA
ASV_14	174.759	9.01058	0.444316	20.2797	1.94332e-91	4.14657e-89	Archaea	Crenarchaeota	Nitrososphaeria	Nitrosopumilales	Nitrosopumilaceae	NA	NA
ASV_6837	1.73541	1.63421	0.464183	3.52061	0.000430561	0.00317294	Archaea	Nanoarchaeota	Nanoarchaeia	Woesearchaeales	SCGC_AAA011-D5	NA	NA
ASV_4384	2.28123	1.72792	0.473981	3.64554	0.000266826	0.00204272	Archaea	Nanoarchaeota	Nanoarchaeia	Woesearchaeales	SCGC_AAA011-D5	NA	NA
ASV_3927	2.80605	1.93074	0.484637	3.98388	6.77989e-05	0.000570368	Bacteria	Acidobacteriota	Acidobacteriae	PAUC26f	NA	NA	NA
ASV_929	8.45313	2.36923	0.495642	4.78013	1.75183e-06	1.83766e-05	Bacteria	Acidobacteriota	Acidobacteriae	PAUC26f	NA	NA	NA
ASV_2029	4.63943	2.46489	0.525444	4.69105	2.71805e-06	2.79195e-05	Bacteria	Acidobacteriota	Acidobacteriae	PAUC26f	NA	NA	NA
ASV_1218	8.30618	2.53398	0.506146	5.00641	5.54534e-07	6.15759e-06	Bacteria	Acidobacteriota	Acidobacteriae	PAUC26f	NA	NA	NA
ASV_3171	3.09295	2.1224	0.539669	3.93277	8.39709e-05	0.000695204	Bacteria	Acidobacteriota	Acidobacteriae	Subgroup_13	NA	NA	NA
ASV_573	13.1905	2.70264	0.449012	6.01908	1.75409e-09	2.49519e-08	Bacteria	Acidobacteriota	Acidobacteriae	Subgroup_13	NA	NA	NA
ASV_4214	2.86903	2.6677	0.474652	5.62033	1.90595e-08	2.45449e-07	Bacteria	Acidobacteriota	Acidobacteriae	Subgroup_15	NA	NA	NA
ASV_3842	2.26723	1.60486	0.486759	3.29704	0.000977109	0.00665969	Bacteria	Acidobacteriota	Acidobacteriae	Subgroup_2	NA	NA	NA
ASV_2754	3.21891	1.77259	0.488634	3.62764	0.000286025	0.00218055	Bacteria	Acidobacteriota	Acidobacteriae	Subgroup_2	NA	NA	NA
ASV_930	3.56179	2.02276	0.575487	3.51486	0.00043999	0.00323988	Bacteria	Acidobacteriota	Acidobacteriae	Subgroup_2	NA	NA	NA
ASV_864	5.32519	2.1964	0.613451	3.58039	0.000343079	0.00257268	Bacteria	Acidobacteriota	Acidobacteriae	Subgroup_2	NA	NA	NA
ASV_1299	4.49248	2.41504	0.602747	4.00671	6.15693e-05	0.0005217	Bacteria	Acidobacteriota	Acidobacteriae	Subgroup_2	NA	NA	NA
ASV_409	10.9023	4.30682	0.653395	6.59145	4.35563e-11	7.0022e-10	Bacteria	Acidobacteriota	Acidobacteriae	Subgroup_2	NA	NA	NA
ASV_343	17.9209	4.56351	0.605763	7.53349	4.94017e-14	9.82644e-13	Bacteria	Acidobacteriota	Acidobacteriae	Subgroup_2	NA	NA	NA
ASV_2949	3.5338	1.87447	0.495909	3.77987	0.000156913	0.00124477	Bacteria	Acidobacteriota	AT-s3-28	NA	NA	NA	NA
ASV_1615	6.38184	2.67242	0.485641	5.50288	3.73638e-08	4.66477e-07	Bacteria	Acidobacteriota	Blastocatellia	Blastocatellales	Blastocatellaceae	Blastocatella	NA
ASV_3879	2.86203	2.69116	0.469711	5.7294	1.00786e-08	1.33174e-07	Bacteria	Acidobacteriota	Blastocatellia	Blastocatellales	Blastocatellaceae	Blastocatella	NA
ASV_707	13.4284	5.1387	0.487233	10.5467	5.2617e-26	1.97994e-24	Bacteria	Acidobacteriota	Blastocatellia	Blastocatellales	Blastocatellaceae	Blastocatella	NA
ASV_1151	3.77872	1.65344	0.529075	3.12516	0.00177709	0.0114629	Bacteria	Acidobacteriota	Subgroup_21	NA	NA	NA	NA
ASV_1260	7.72538	1.69116	0.598819	2.82416	0.00474048	0.0277037	Bacteria	Acidobacteriota	Subgroup_21	NA	NA	NA	NA
ASV_1698	3.91167	1.69116	0.499179	3.38789	0.000704331	0.00494186	Bacteria	Acidobacteriota	Subgroup_21	NA	NA	NA	NA
ASV_1013	5.68207	2.05166	0.591769	3.467	0.000526308	0.00379657	Bacteria	Acidobacteriota	Subgroup_21	NA	NA	NA	NA
ASV_822	11.3292	2.16992	0.440271	4.92861	8.28178e-07	9.02012e-06	Bacteria	Acidobacteriota	Subgroup_21	NA	NA	NA	NA
ASV_1097	9.53077	2.24159	0.434629	5.15747	2.50304e-07	2.9012e-06	Bacteria	Acidobacteriota	Subgroup_21	NA	NA	NA	NA
ASV_695	15.9406	2.26053	0.536577	4.21286	2.52153e-05	0.000225676	Bacteria	Acidobacteriota	Subgroup_21	NA	NA	NA	NA
ASV_1037	9.20188	2.36048	0.404066	5.84182	5.16329e-09	7.03564e-08	Bacteria	Acidobacteriota	Subgroup_21	NA	NA	NA	NA
ASV_1889	6.63375	2.39803	0.580989	4.1275	3.66736e-05	0.000320736	Bacteria	Acidobacteriota	Subgroup_21	NA	NA	NA	NA
ASV_986	7.50845	2.70004	0.553357	4.87938	1.06421e-06	1.14187e-05	Bacteria	Acidobacteriota	Subgroup_21	NA	NA	NA	NA
ASV_407	17.774	3.07681	0.488715	6.29572	3.05972e-10	4.64824e-09	Bacteria	Acidobacteriota	Subgroup_21	NA	NA	NA	NA
ASV_346	26.8989	3.34281	0.491971	6.79475	1.08504e-11	1.82235e-10	Bacteria	Acidobacteriota	Subgroup_21	NA	NA	NA	NA
ASV_576	14.4781	3.7462	0.413667	9.05608	1.35223e-19	3.77839e-18	Bacteria	Acidobacteriota	Subgroup_21	NA	NA	NA	NA
ASV_418	23.8339	3.90288	0.524437	7.44203	9.91521e-14	1.93734e-12	Bacteria	Acidobacteriota	Subgroup_21	NA	NA	NA	NA
ASV_281	25.1985	3.94642	0.405184	9.73982	2.03919e-22	6.46789e-21	Bacteria	Acidobacteriota	Subgroup_21	NA	NA	NA	NA
ASV_286	28.3684	4.01446	0.486171	8.2573	1.49003e-16	3.47125e-15	Bacteria	Acidobacteriota	Subgroup_21	NA	NA	NA	NA
ASV_1145	10.6014	4.11374	0.544022	7.56171	3.978e-14	7.95474e-13	Bacteria	Acidobacteriota	Subgroup_21	NA	NA	NA	NA
ASV_103	58.0173	5.11461	0.414819	12.3297	6.26429e-35	3.39956e-33	Bacteria	Acidobacteriota	Subgroup_21	NA	NA	NA	NA
ASV_41	86.7986	5.64302	0.397511	14.1959	9.71478e-46	7.15351e-44	Bacteria	Acidobacteriota	Subgroup_21	NA	NA	NA	NA
ASV_3671	3.01598	1.60486	0.494713	3.24403	0.00117852	0.00790326	Bacteria	Acidobacteriota	Subgroup_22	NA	NA	NA	NA
ASV_844	9.21588	1.61212	0.430963	3.74075	0.000183474	0.00143905	Bacteria	Acidobacteriota	Subgroup_22	NA	NA	NA	NA
ASV_5976	1.83338	1.61471	0.465508	3.4687	0.000522974	0.00377688	Bacteria	Acidobacteriota	Subgroup_22	NA	NA	NA	NA
ASV_3571	2.88302	1.64386	0.487294	3.37343	0.000742366	0.00518772	Bacteria	Acidobacteriota	Subgroup_22	NA	NA	NA	NA
ASV_5993	1.91035	1.64386	0.41465	3.96444	7.35671e-05	0.00061531	Bacteria	Acidobacteriota	Subgroup_22	NA	NA	NA	NA
ASV_860	10.0276	1.68182	0.441299	3.81108	0.000138362	0.00110742	Bacteria	Acidobacteriota	Subgroup_22	NA	NA	NA	NA
ASV_4018	2.6591	1.69116	0.492937	3.43079	0.000601836	0.0042952	Bacteria	Acidobacteriota	Subgroup_22	NA	NA	NA	NA
ASV_4648	2.16227	1.77259	0.449696	3.94175	8.08899e-05	0.000672066	Bacteria	Acidobacteriota	Subgroup_22	NA	NA	NA	NA
ASV_3748	2.88302	1.86625	0.486288	3.83774	0.00012417	0.00100299	Bacteria	Acidobacteriota	Subgroup_22	NA	NA	NA	NA
ASV_2485	3.60378	1.91488	0.564522	3.39204	0.000693742	0.00488556	Bacteria	Acidobacteriota	Subgroup_22	NA	NA	NA	NA
ASV_2085	5.0173	1.93074	0.504392	3.82785	0.000129268	0.00103996	Bacteria	Acidobacteriota	Subgroup_22	NA	NA	NA	NA
ASV_6183	2.09229	2.05889	0.458736	4.48819	7.18317e-06	6.94891e-05	Bacteria	Acidobacteriota	Subgroup_22	NA	NA	NA	NA
ASV_1980	5.09427	2.06609	0.492757	4.19291	2.75394e-05	0.000245307	Bacteria	Acidobacteriota	Subgroup_22	NA	NA	NA	NA
ASV_2525	4.34553	2.29155	0.536793	4.26897	1.96375e-05	0.00017796	Bacteria	Acidobacteriota	Subgroup_22	NA	NA	NA	NA
ASV_904	8.69105	2.42004	0.484645	4.99342	5.9319e-07	6.56742e-06	Bacteria	Acidobacteriota	Subgroup_22	NA	NA	NA	NA
ASV_749	12.3508	2.75043	0.436161	6.30599	2.86351e-10	4.36429e-09	Bacteria	Acidobacteriota	Subgroup_22	NA	NA	NA	NA
ASV_689	12.8686	2.80305	0.451735	6.20509	5.46666e-10	8.09523e-09	Bacteria	Acidobacteriota	Subgroup_22	NA	NA	NA	NA
ASV_913	10.1606	3.93271	0.520098	7.56147	3.9853e-14	7.96084e-13	Bacteria	Acidobacteriota	Subgroup_22	NA	NA	NA	NA
ASV_2388	3.65276	1.70044	0.501329	3.39187	0.000694184	0.00488556	Bacteria	Acidobacteriota	Subgroup_26	NA	NA	NA	NA
ASV_6145	1.90335	1.61471	0.46493	3.47301	0.00051465	0.00372249	Bacteria	Acidobacteriota	Thermoanaerobaculia	Thermoanaerobaculales	Thermoanaerobaculaceae	Subgroup_10	NA
ASV_5678	2.15527	1.64386	0.498955	3.2946	0.000985623	0.00671275	Bacteria	Acidobacteriota	Thermoanaerobaculia	Thermoanaerobaculales	Thermoanaerobaculaceae	Subgroup_10	NA
ASV_7298	1.84737	1.80735	0.460547	3.92437	8.69579e-05	0.00071835	Bacteria	Acidobacteriota	Thermoanaerobaculia	Thermoanaerobaculales	Thermoanaerobaculaceae	Subgroup_10	NA
ASV_6443	1.93834	1.91488	0.460613	4.15724	3.22109e-05	0.000284088	Bacteria	Acidobacteriota	Thermoanaerobaculia	Thermoanaerobaculales	Thermoanaerobaculaceae	Subgroup_10	NA
ASV_767	9.29985	1.94642	0.476393	4.08574	4.39364e-05	0.000379832	Bacteria	Acidobacteriota	Thermoanaerobaculia	Thermoanaerobaculales	Thermoanaerobaculaceae	Subgroup_10	NA
ASV_3850	3.13494	2.16992	0.503555	4.30921	1.6384e-05	0.000150363	Bacteria	Acidobacteriota	Thermoanaerobaculia	Thermoanaerobaculales	Thermoanaerobaculaceae	Subgroup_10	NA
ASV_1904	4.25456	2.21594	0.461087	4.8059	1.54059e-06	1.62789e-05	Bacteria	Acidobacteriota	Thermoanaerobaculia	Thermoanaerobaculales	Thermoanaerobaculaceae	Subgroup_10	NA
ASV_5074	2.27423	2.25424	0.461134	4.88848	1.0162e-06	1.09222e-05	Bacteria	Acidobacteriota	Thermoanaerobaculia	Thermoanaerobaculales	Thermoanaerobaculaceae	Subgroup_10	NA
ASV_4278	2.32321	2.29768	0.496673	4.62614	3.72544e-06	3.74278e-05	Bacteria	Acidobacteriota	Thermoanaerobaculia	Thermoanaerobaculales	Thermoanaerobaculaceae	Subgroup_10	NA
ASV_1733	4.02364	2.44846	0.495134	4.94504	7.61279e-07	8.3253e-06	Bacteria	Acidobacteriota	Thermoanaerobaculia	Thermoanaerobaculales	Thermoanaerobaculaceae	Subgroup_10	NA
ASV_2182	3.81371	2.49185	0.54095	4.60644	4.09618e-06	4.09553e-05	Bacteria	Acidobacteriota	Thermoanaerobaculia	Thermoanaerobaculales	Thermoanaerobaculaceae	Subgroup_10	NA
ASV_1547	6.12992	2.61961	0.524958	4.99012	6.03404e-07	6.67263e-06	Bacteria	Acidobacteriota	Thermoanaerobaculia	Thermoanaerobaculales	Thermoanaerobaculaceae	Subgroup_10	NA
ASV_3753	3.21191	2.91886	0.511211	5.7097	1.13177e-08	1.48713e-07	Bacteria	Acidobacteriota	Thermoanaerobaculia	Thermoanaerobaculales	Thermoanaerobaculaceae	Subgroup_10	NA
ASV_2282	4.59044	3.29768	0.48878	6.74676	1.51187e-11	2.51225e-10	Bacteria	Acidobacteriota	Thermoanaerobaculia	Thermoanaerobaculales	Thermoanaerobaculaceae	Subgroup_10	NA
ASV_2031	5.3042	3.76598	0.48648	7.74127	9.84253e-15	2.04666e-13	Bacteria	Acidobacteriota	Thermoanaerobaculia	Thermoanaerobaculales	Thermoanaerobaculaceae	Subgroup_10	NA
ASV_908	10.6224	3.85175	0.501739	7.6768	1.63115e-14	3.33276e-13	Bacteria	Acidobacteriota	Thermoanaerobaculia	Thermoanaerobaculales	Thermoanaerobaculaceae	Subgroup_10	NA
ASV_314	25.4994	5.83394	0.486912	11.9815	4.44172e-33	2.29127e-31	Bacteria	Acidobacteriota	Thermoanaerobaculia	Thermoanaerobaculales	Thermoanaerobaculaceae	Subgroup_10	NA
ASV_2303	3.15593	2.04439	0.487657	4.19228	2.76165e-05	0.000245761	Bacteria	Acidobacteriota	Vicinamibacteria	Subgroup_17	NA	NA	NA
ASV_975	8.37616	3.39518	0.476978	7.11809	1.09431e-12	1.97196e-11	Bacteria	Acidobacteriota	Vicinamibacteria	Subgroup_17	NA	NA	NA
ASV_1607	5.66108	3.72338	0.522878	7.12093	1.07202e-12	1.9355e-11	Bacteria	Acidobacteriota	Vicinamibacteria	Subgroup_17	NA	NA	NA
ASV_161	36.9125	6.12525	0.398498	15.3708	2.56801e-53	2.3871e-51	Bacteria	Acidobacteriota	Vicinamibacteria	Subgroup_17	NA	NA	NA
ASV_2283	3.12794	1.69116	0.482203	3.50716	0.000452924	0.00331325	Bacteria	Acidobacteriota	Vicinamibacteria	Subgroup_9	NA	NA	NA
ASV_1777	3.5548	1.82443	0.57091	3.19565	0.00139516	0.00924381	Bacteria	Acidobacteriota	Vicinamibacteria	Subgroup_9	NA	NA	NA
ASV_629	13.1415	1.84967	0.452237	4.09004	4.31302e-05	0.000373549	Bacteria	Acidobacteriota	Vicinamibacteria	Subgroup_9	NA	NA	NA
ASV_2058	1.96633	1.91488	0.480318	3.9867	6.69989e-05	0.000564143	Bacteria	Acidobacteriota	Vicinamibacteria	Subgroup_9	NA	NA	NA
ASV_819	8.5441	2.50779	0.463572	5.40972	6.31229e-08	7.72659e-07	Bacteria	Acidobacteriota	Vicinamibacteria	Subgroup_9	NA	NA	NA
ASV_4048	2.98099	2.57491	0.505743	5.09134	3.55547e-07	4.04857e-06	Bacteria	Acidobacteriota	Vicinamibacteria	Subgroup_9	NA	NA	NA
ASV_3455	3.13494	2.84966	0.494152	5.76678	8.07989e-09	1.08369e-07	Bacteria	Acidobacteriota	Vicinamibacteria	Subgroup_9	NA	NA	NA
ASV_1326	8.61408	3.38658	0.514681	6.57996	4.70564e-11	7.51341e-10	Bacteria	Acidobacteriota	Vicinamibacteria	Subgroup_9	NA	NA	NA
ASV_1287	7.99829	4.24317	0.485246	8.74437	2.24264e-18	5.80027e-17	Bacteria	Acidobacteriota	Vicinamibacteria	Subgroup_9	NA	NA	NA
ASV_1268	7.44548	4.32643	0.534421	8.09554	5.70105e-16	1.27743e-14	Bacteria	Acidobacteriota	Vicinamibacteria	Subgroup_9	NA	NA	NA
ASV_1197	7.42448	4.32942	0.53312	8.12091	4.62704e-16	1.04425e-14	Bacteria	Acidobacteriota	Vicinamibacteria	Subgroup_9	NA	NA	NA
ASV_776	10.6294	4.4108	0.5728	7.70042	1.35618e-14	2.7861e-13	Bacteria	Acidobacteriota	Vicinamibacteria	Subgroup_9	NA	NA	NA
ASV_659	14.4501	5.20945	0.552399	9.4306	4.0775e-21	1.22697e-19	Bacteria	Acidobacteriota	Vicinamibacteria	Subgroup_9	NA	NA	NA
ASV_191	29.6769	5.5157	0.570268	9.67211	3.96114e-22	1.22939e-20	Bacteria	Acidobacteriota	Vicinamibacteria	Subgroup_9	NA	NA	NA
ASV_373	21.7696	5.70978	0.454351	12.5669	3.21037e-36	1.80482e-34	Bacteria	Acidobacteriota	Vicinamibacteria	Subgroup_9	NA	NA	NA
ASV_222	36.9545	6.51734	0.44213	14.7408	3.52714e-49	2.81826e-47	Bacteria	Acidobacteriota	Vicinamibacteria	Subgroup_9	NA	NA	NA
ASV_1577	4.40851	2.16323	0.481328	4.49429	6.98018e-06	6.77321e-05	Bacteria	Acidobacteriota	Vicinamibacteria	Vicinamibacterales	NA	NA	NA
ASV_1004	7.60642	2.86005	0.440407	6.49411	8.35248e-11	1.31904e-09	Bacteria	Acidobacteriota	Vicinamibacteria	Vicinamibacterales	NA	NA	NA
ASV_1677	5.98997	1.89885	0.488304	3.88867	0.000100795	0.000825752	Bacteria	Acidobacteriota	Vicinamibacteria	Vicinamibacterales	Vicinamibacteraceae	NA	NA
ASV_350	25.1075	1.76377	0.648143	2.72126	0.00650339	0.0368257	Bacteria	Actinobacteriota	Acidimicrobiia	Actinomarinales	NA	NA	NA
ASV_4336	1.84737	1.80735	0.495686	3.64617	0.000266181	0.00204003	Bacteria	Actinobacteriota	Acidimicrobiia	Actinomarinales	NA	NA	NA
ASV_364	23.8619	1.81592	0.663614	2.7364	0.00621149	0.0354832	Bacteria	Actinobacteriota	Acidimicrobiia	Actinomarinales	NA	NA	NA
ASV_2228	3.56179	2.10852	0.604674	3.48704	0.000488392	0.0035531	Bacteria	Actinobacteriota	Acidimicrobiia	Actinomarinales	NA	NA	NA
ASV_892	9.11091	2.17659	0.69555	3.1293	0.00175221	0.0113063	Bacteria	Actinobacteriota	Acidimicrobiia	Actinomarinales	NA	NA	NA
ASV_3965	2.33021	2.26679	0.512186	4.42571	9.61256e-06	9.12975e-05	Bacteria	Actinobacteriota	Acidimicrobiia	Actinomarinales	NA	NA	NA
ASV_356	15.6047	2.29573	0.739843	3.103	0.0019157	0.0122517	Bacteria	Actinobacteriota	Acidimicrobiia	Actinomarinales	NA	NA	NA
ASV_1206	3.69475	2.60486	0.579774	4.49289	7.02629e-06	6.81118e-05	Bacteria	Actinobacteriota	Acidimicrobiia	Actinomarinales	NA	NA	NA
ASV_2172	4.50647	2.79008	0.624369	4.46863	7.87204e-06	7.58795e-05	Bacteria	Actinobacteriota	Acidimicrobiia	Actinomarinales	NA	NA	NA
ASV_3710	3.12794	2.86212	0.5395	5.30514	1.12587e-07	1.34911e-06	Bacteria	Actinobacteriota	Acidimicrobiia	Actinomarinales	NA	NA	NA
ASV_2488	4.40151	3.47303	0.539677	6.43538	1.23163e-10	1.93041e-09	Bacteria	Actinobacteriota	Acidimicrobiia	Actinomarinales	NA	NA	NA
ASV_947	10.8393	3.95613	0.688201	5.74851	9.00319e-09	1.19981e-07	Bacteria	Actinobacteriota	Acidimicrobiia	Actinomarinales	NA	NA	NA
ASV_812	9.61474	4.1964	0.635411	6.60423	3.99598e-11	6.45719e-10	Bacteria	Actinobacteriota	Acidimicrobiia	Actinomarinales	NA	NA	NA
ASV_1612	7.28453	4.29921	0.575526	7.47004	8.01679e-14	1.57624e-12	Bacteria	Actinobacteriota	Acidimicrobiia	Actinomarinales	NA	NA	NA
ASV_227	27.0458	5.20783	0.565096	9.21583	3.08877e-20	8.90903e-19	Bacteria	Actinobacteriota	Acidimicrobiia	Actinomarinales	NA	NA	NA
ASV_733	15.6327	5.47708	0.544268	10.0632	8.03348e-24	2.72775e-22	Bacteria	Actinobacteriota	Acidimicrobiia	Actinomarinales	NA	NA	NA
ASV_12	115.818	5.93467	0.452911	13.1034	3.14893e-39	2.018e-37	Bacteria	Actinobacteriota	Acidimicrobiia	Actinomarinales	NA	NA	NA
ASV_166	44.5329	6.86418	0.583222	11.7694	5.61113e-32	2.71547e-30	Bacteria	Actinobacteriota	Acidimicrobiia	Actinomarinales	NA	NA	NA
ASV_5127	2.44217	2.3634	0.492136	4.80234	1.56819e-06	1.65241e-05	Bacteria	Actinobacteriota	Acidimicrobiia	Microtrichales	Ilumatobacteraceae	Ilumatobacter	NA
ASV_4052	2.79205	2.56478	0.487106	5.26535	1.39924e-07	1.66182e-06	Bacteria	Actinobacteriota	Acidimicrobiia	Microtrichales	Ilumatobacteraceae	Ilumatobacter	NA
ASV_2355	3.37286	2.91089	0.558502	5.21196	1.86853e-07	2.19284e-06	Bacteria	Actinobacteriota	Acidimicrobiia	Microtrichales	Microtrichaceae	NA	NA
ASV_2037	6.22089	4.04621	0.587827	6.88334	5.84666e-12	1.0035e-10	Bacteria	Actinobacteriota	Acidimicrobiia	Microtrichales	Microtrichaceae	NA	NA
ASV_483	21.6297	5.81689	0.557993	10.4247	1.91315e-25	7.04378e-24	Bacteria	Actinobacteriota	Acidimicrobiia	Microtrichales	Microtrichaceae	NA	NA
ASV_7128	1.79139	1.73697	0.452315	3.84017	0.00012295	0.000994241	Bacteria	Actinobacteriota	Acidimicrobiia	Microtrichales	Microtrichaceae	Sva0996_marine_group	NA
ASV_7164	1.81938	1.75489	0.427811	4.10202	4.09567e-05	0.000356039	Bacteria	Actinobacteriota	Acidimicrobiia	Microtrichales	Microtrichaceae	Sva0996_marine_group	NA
ASV_7357	1.81938	1.77259	0.429728	4.12491	3.70876e-05	0.000323904	Bacteria	Actinobacteriota	Acidimicrobiia	Microtrichales	Microtrichaceae	Sva0996_marine_group	NA
ASV_6169	1.88936	1.8413	0.467058	3.94234	8.06898e-05	0.0006707	Bacteria	Actinobacteriota	Acidimicrobiia	Microtrichales	Microtrichaceae	Sva0996_marine_group	NA
ASV_6467	2.02931	2.01495	0.476894	4.22515	2.38783e-05	0.000214425	Bacteria	Actinobacteriota	Acidimicrobiia	Microtrichales	Microtrichaceae	Sva0996_marine_group	NA
ASV_4097	2.84104	2.47573	0.505187	4.90063	9.55313e-07	1.02914e-05	Bacteria	Actinobacteriota	Acidimicrobiia	Microtrichales	Microtrichaceae	Sva0996_marine_group	NA
ASV_4699	2.73607	2.61961	0.470089	5.57258	2.50998e-08	3.18445e-07	Bacteria	Actinobacteriota	Acidimicrobiia	Microtrichales	Microtrichaceae	Sva0996_marine_group	NA
ASV_2279	5.0103	3.56985	0.567932	6.2857	3.26375e-10	4.9462e-09	Bacteria	Actinobacteriota	Acidimicrobiia	Microtrichales	Microtrichaceae	Sva0996_marine_group	NA
ASV_2118	5.34619	3.78572	0.503359	7.52093	5.43891e-14	1.07842e-12	Bacteria	Actinobacteriota	Acidimicrobiia	Microtrichales	Microtrichaceae	Sva0996_marine_group	NA
ASV_1674	7.3895	4.28386	0.523451	8.18387	2.74868e-16	6.28648e-15	Bacteria	Actinobacteriota	Acidimicrobiia	Microtrichales	Microtrichaceae	Sva0996_marine_group	NA
ASV_702	14.737	4.74371	0.669733	7.08298	1.41083e-12	2.52057e-11	Bacteria	Actinobacteriota	Acidimicrobiia	Microtrichales	Microtrichaceae	Sva0996_marine_group	NA
ASV_1044	10.3985	4.81378	0.51768	9.29875	1.42111e-20	4.18905e-19	Bacteria	Actinobacteriota	Acidimicrobiia	Microtrichales	Microtrichaceae	Sva0996_marine_group	NA
ASV_437	21.4477	5.13784	0.636362	8.07377	6.81599e-16	1.52e-14	Bacteria	Actinobacteriota	Acidimicrobiia	Microtrichales	Microtrichaceae	Sva0996_marine_group	NA
ASV_1309	7.20056	1.69116	0.568204	2.97633	0.00291724	0.017901	Bacteria	Actinobacteriota	Thermoleophilia	Gaiellales	NA	NA	NA
ASV_7627	1.7844	1.72792	0.493135	3.50395	0.000458419	0.00334931	Bacteria	Actinobacteriota	Thermoleophilia	Solirubrobacterales	67-14	NA	NA
ASV_2663	3.14193	1.84967	0.481972	3.8377	0.000124192	0.00100299	Bacteria	Actinobacteriota	Thermoleophilia	Solirubrobacterales	67-14	NA	NA
ASV_6103	2.0713	2.05166	0.493939	4.15367	3.27179e-05	0.000288153	Bacteria	Actinobacteriota	Thermoleophilia	Solirubrobacterales	67-14	NA	NA
ASV_5249	2.30222	2.08746	0.45011	4.63768	3.52348e-06	3.55892e-05	Bacteria	Actinobacteriota	Thermoleophilia	Solirubrobacterales	67-14	NA	NA
ASV_833	13.9043	5.22239	0.487177	10.7197	8.22718e-27	3.23184e-25	Bacteria	Actinobacteriota	Thermoleophilia	Solirubrobacterales	67-14	NA	NA
ASV_7297	1.7704	1.70966	0.429534	3.98026	6.88403e-05	0.000577318	Bacteria	Bacteroidota	Bacteroidia	Chitinophagales	Saprospiraceae	NA	NA
ASV_6200	1.93834	1.91488	0.463416	4.1321	3.59456e-05	0.000314956	Bacteria	Bacteroidota	Bacteroidia	Chitinophagales	Saprospiraceae	NA	NA
ASV_6646	1.99432	1.97728	0.476831	4.14671	3.37282e-05	0.000296357	Bacteria	Bacteroidota	Bacteroidia	Chitinophagales	Saprospiraceae	NA	NA
ASV_4449	2.21825	2.11548	0.461503	4.58388	4.56423e-06	4.52973e-05	Bacteria	Bacteroidota	Bacteroidia	Chitinophagales	Saprospiraceae	NA	NA
ASV_1797	2.21125	2.18322	0.484844	4.50294	6.70206e-06	6.52382e-05	Bacteria	Bacteroidota	Bacteroidia	Chitinophagales	Saprospiraceae	NA	NA
ASV_4311	2.48416	2.34577	0.455888	5.1455	2.66806e-07	3.07539e-06	Bacteria	Bacteroidota	Bacteroidia	Chitinophagales	Saprospiraceae	NA	NA
ASV_3796	3.14893	2.88264	0.493373	5.84272	5.13556e-09	7.00293e-08	Bacteria	Bacteroidota	Bacteroidia	Chitinophagales	Saprospiraceae	NA	NA
ASV_2650	3.93267	2.99079	0.500261	5.97845	2.25266e-09	3.16366e-08	Bacteria	Bacteroidota	Bacteroidia	Chitinophagales	Saprospiraceae	NA	NA
ASV_1884	5.16425	3.73696	0.481064	7.76812	7.96615e-15	1.67129e-13	Bacteria	Bacteroidota	Bacteroidia	Chitinophagales	Saprospiraceae	NA	NA
ASV_5607	2.32321	2.29768	0.487594	4.71228	2.44959e-06	2.53282e-05	Bacteria	Bacteroidota	Bacteroidia	Chitinophagales	Saprospiraceae	Portibacter	NA
ASV_3040	3.38685	2.32193	0.455567	5.09678	3.45478e-07	3.9435e-06	Bacteria	Bacteroidota	Bacteroidia	Chitinophagales	Saprospiraceae	Portibacter	NA
ASV_4132	2.78506	2.55658	0.474055	5.39299	6.92944e-08	8.46546e-07	Bacteria	Bacteroidota	Bacteroidia	Chitinophagales	Saprospiraceae	Portibacter	NA
ASV_2810	3.5268	2.57491	0.455733	5.65004	1.60411e-08	2.08301e-07	Bacteria	Bacteroidota	Bacteroidia	Chitinophagales	Saprospiraceae	Portibacter	NA
ASV_3162	3.49182	3.05528	0.506058	6.03741	1.56603e-09	2.23785e-08	Bacteria	Bacteroidota	Bacteroidia	Chitinophagales	Saprospiraceae	Portibacter	NA
ASV_1695	5.20624	3.09452	0.499387	6.19663	5.76843e-10	8.52194e-09	Bacteria	Bacteroidota	Bacteroidia	Chitinophagales	Saprospiraceae	Portibacter	NA
ASV_2723	3.98865	3.11393	0.539011	5.77713	7.59861e-09	1.02352e-07	Bacteria	Bacteroidota	Bacteroidia	Cytophagales	Amoebophilaceae	Candidatus_Amoebophilus	NA
ASV_7262	1.85437	1.79008	0.47007	3.80811	0.000140034	0.00111985	Bacteria	Bacteroidota	Bacteroidia	Cytophagales	Amoebophilaceae	NA	NA
ASV_5212	2.42818	1.84967	0.473593	3.9056	9.3993e-05	0.000773064	Bacteria	Bacteroidota	Bacteroidia	Cytophagales	Cyclobacteriaceae	Ekhidna	NA
ASV_830	10.2655	3.27908	0.448227	7.31568	2.56082e-13	4.88663e-12	Bacteria	Bacteroidota	Bacteroidia	Cytophagales	Cyclobacteriaceae	Ekhidna	NA
ASV_2844	4.10761	3.34873	0.463869	7.21913	5.23217e-13	9.69836e-12	Bacteria	Bacteroidota	Bacteroidia	Cytophagales	Cyclobacteriaceae	Ekhidna	NA
ASV_2456	5.07328	3.70966	0.499323	7.42937	1.09115e-13	2.12536e-12	Bacteria	Bacteroidota	Bacteroidia	Cytophagales	Cyclobacteriaceae	Ekhidna	NA
ASV_4876	2.19026	1.89077	0.428867	4.40875	1.03967e-05	9.79033e-05	Bacteria	Bacteroidota	Bacteroidia	Cytophagales	Cyclobacteriaceae	Fulvivirga	NA
ASV_1209	8.60008	3.54689	0.459307	7.72226	1.14281e-14	2.35808e-13	Bacteria	Bacteroidota	Bacteroidia	Cytophagales	Cyclobacteriaceae	Fulvivirga	NA
ASV_3419	3.01598	1.72792	0.450015	3.83969	0.000123189	0.000995744	Bacteria	Bacteroidota	Bacteroidia	Cytophagales	Cyclobacteriaceae	NA	NA
ASV_1111	6.76671	1.75489	0.525905	3.33689	0.000847223	0.00587673	Bacteria	Bacteroidota	Bacteroidia	Cytophagales	Cyclobacteriaceae	NA	NA
ASV_720	12.5747	1.80735	0.424506	4.25755	2.06681e-05	0.000186939	Bacteria	Bacteroidota	Bacteroidia	Cytophagales	Cyclobacteriaceae	NA	NA
ASV_5035	2.02931	1.90689	0.432824	4.40569	1.05446e-05	9.89489e-05	Bacteria	Bacteroidota	Bacteroidia	Cytophagales	Cyclobacteriaceae	NA	NA
ASV_2406	3.86269	1.96193	0.547059	3.58633	0.000335367	0.00251988	Bacteria	Bacteroidota	Bacteroidia	Cytophagales	Cyclobacteriaceae	NA	NA
ASV_5862	2.14127	1.97728	0.48053	4.11479	3.87532e-05	0.000337665	Bacteria	Bacteroidota	Bacteroidia	Cytophagales	Cyclobacteriaceae	NA	NA
ASV_5891	2.14827	2.03709	0.43532	4.67952	2.8755e-06	2.94242e-05	Bacteria	Bacteroidota	Bacteroidia	Cytophagales	Cyclobacteriaceae	NA	NA
ASV_5928	2.0643	2.05166	0.454779	4.51134	6.44191e-06	6.28689e-05	Bacteria	Bacteroidota	Bacteroidia	Cytophagales	Cyclobacteriaceae	NA	NA
ASV_609	13.8693	2.05889	0.421365	4.88625	1.02774e-06	1.10399e-05	Bacteria	Bacteroidota	Bacteroidia	Cytophagales	Cyclobacteriaceae	NA	NA
ASV_1586	6.03196	2.29258	0.481313	4.76317	1.90571e-06	1.98908e-05	Bacteria	Bacteroidota	Bacteroidia	Cytophagales	Cyclobacteriaceae	NA	NA
ASV_997	9.65673	2.30378	0.518244	4.44536	8.7746e-06	8.36684e-05	Bacteria	Bacteroidota	Bacteroidia	Cytophagales	Cyclobacteriaceae	NA	NA
ASV_4608	2.42818	2.38082	0.489887	4.85994	1.17423e-06	1.25133e-05	Bacteria	Bacteroidota	Bacteroidia	Cytophagales	Cyclobacteriaceae	NA	NA
ASV_4147	3.07896	2.8413	0.528661	5.37453	7.67848e-08	9.32593e-07	Bacteria	Bacteroidota	Bacteroidia	Cytophagales	Cyclobacteriaceae	NA	NA
ASV_2410	4.26855	3.02237	0.578972	5.22023	1.78698e-07	2.09976e-06	Bacteria	Bacteroidota	Bacteroidia	Cytophagales	Cyclobacteriaceae	NA	NA
ASV_2226	5.06628	3.05166	0.512072	5.95944	2.53107e-09	3.54143e-08	Bacteria	Bacteroidota	Bacteroidia	Cytophagales	Cyclobacteriaceae	NA	NA
ASV_474	18.5367	3.14636	0.433181	7.26338	3.77548e-13	7.11055e-12	Bacteria	Bacteroidota	Bacteroidia	Cytophagales	Cyclobacteriaceae	NA	NA
ASV_411	19.9852	3.28232	0.539733	6.08137	1.19157e-09	1.72109e-08	Bacteria	Bacteroidota	Bacteroidia	Cytophagales	Cyclobacteriaceae	NA	NA
ASV_943	9.64973	3.36923	0.474455	7.10126	1.23622e-12	2.21705e-11	Bacteria	Bacteroidota	Bacteroidia	Cytophagales	Cyclobacteriaceae	NA	NA
ASV_2462	4.84936	3.40939	0.575928	5.91982	3.22296e-09	4.46624e-08	Bacteria	Bacteroidota	Bacteroidia	Cytophagales	Cyclobacteriaceae	NA	NA
ASV_1101	7.22855	3.53398	0.503287	7.02179	2.19037e-12	3.86546e-11	Bacteria	Bacteroidota	Bacteroidia	Cytophagales	Cyclobacteriaceae	NA	NA
ASV_1147	7.78836	3.58746	0.526451	6.81443	9.46383e-12	1.59804e-10	Bacteria	Bacteroidota	Bacteroidia	Cytophagales	Cyclobacteriaceae	NA	NA
ASV_1119	9.69171	3.81378	0.535519	7.12165	1.06642e-12	1.92725e-11	Bacteria	Bacteroidota	Bacteroidia	Cytophagales	Cyclobacteriaceae	NA	NA
ASV_358	21.5807	3.96557	0.479756	8.26581	1.38753e-16	3.24453e-15	Bacteria	Bacteroidota	Bacteroidia	Cytophagales	Cyclobacteriaceae	NA	NA
ASV_857	11.4621	4.04803	0.522598	7.74598	9.48459e-15	1.97441e-13	Bacteria	Bacteroidota	Bacteroidia	Cytophagales	Cyclobacteriaceae	NA	NA
ASV_225	32.1331	4.16992	0.439046	9.4977	2.14578e-21	6.55142e-20	Bacteria	Bacteroidota	Bacteroidia	Cytophagales	Cyclobacteriaceae	NA	NA
ASV_596	13.8903	4.30073	0.492179	8.73815	2.36959e-18	6.11179e-17	Bacteria	Bacteroidota	Bacteroidia	Cytophagales	Cyclobacteriaceae	NA	NA
ASV_820	11.1122	4.31288	0.558477	7.72257	1.14005e-14	2.35656e-13	Bacteria	Bacteroidota	Bacteroidia	Cytophagales	Cyclobacteriaceae	NA	NA
ASV_1137	11.1332	4.96	0.57916	8.56413	1.08894e-17	2.72263e-16	Bacteria	Bacteroidota	Bacteroidia	Cytophagales	Cyclobacteriaceae	NA	NA
ASV_153	39.1307	6.09627	0.55145	11.055	2.07359e-28	8.5951e-27	Bacteria	Bacteroidota	Bacteroidia	Cytophagales	Cyclobacteriaceae	NA	NA
ASV_104	52.0554	6.56065	0.448979	14.6124	2.34204e-48	1.83235e-46	Bacteria	Bacteroidota	Bacteroidia	Cytophagales	Cyclobacteriaceae	NA	NA
ASV_48	101.2	8.0889	0.490826	16.4802	5.09492e-61	5.66079e-59	Bacteria	Bacteroidota	Bacteroidia	Cytophagales	Cyclobacteriaceae	NA	NA
ASV_3047	3.28189	1.8413	0.470178	3.91618	8.99632e-05	0.000742522	Bacteria	Bacteroidota	Bacteroidia	Cytophagales	Cyclobacteriaceae	Reichenbachiella	NA
ASV_1461	6.71073	2.17659	0.472696	4.60462	4.13214e-06	4.12929e-05	Bacteria	Bacteroidota	Bacteroidia	Cytophagales	Cyclobacteriaceae	Reichenbachiella	NA
ASV_3552	2.69409	1.73696	0.53222	3.26362	0.00109998	0.00741094	Bacteria	Bacteroidota	Bacteroidia	Flavobacteriales	Cryomorphaceae	Vicingus	NA
ASV_2721	3.81371	2.24546	0.504102	4.45439	8.41329e-06	8.06413e-05	Bacteria	Bacteroidota	Bacteroidia	Flavobacteriales	Cryomorphaceae	Vicingus	NA
ASV_2630	1.99432	1.61471	0.473769	3.40822	0.000653874	0.00463663	Bacteria	Bacteroidota	Bacteroidia	Flavobacteriales	Flavobacteriaceae	Aquibacter	NA
ASV_4694	2.54014	1.73697	0.516297	3.36427	0.000767452	0.00535505	Bacteria	Bacteroidota	Bacteroidia	Flavobacteriales	Flavobacteriaceae	Aquibacter	NA
ASV_2824	4.21957	1.84967	0.575267	3.21532	0.00130301	0.00868678	Bacteria	Bacteroidota	Bacteroidia	Flavobacteriales	Flavobacteriaceae	Aquibacter	NA
ASV_675	15.2408	1.88264	0.472766	3.98218	6.8285e-05	0.000573685	Bacteria	Bacteroidota	Bacteroidia	Flavobacteriales	Flavobacteriaceae	Aquibacter	NA
ASV_2339	2.32321	2.29768	0.521136	4.40899	1.03856e-05	9.78478e-05	Bacteria	Bacteroidota	Bacteroidia	Flavobacteriales	Flavobacteriaceae	Aquibacter	NA
ASV_4096	2.81305	2.65821	0.491025	5.41359	6.1772e-08	7.57605e-07	Bacteria	Bacteroidota	Bacteroidia	Flavobacteriales	Flavobacteriaceae	Aquibacter	NA
ASV_3719	3.02997	2.80305	0.499109	5.61611	1.95301e-08	2.50833e-07	Bacteria	Bacteroidota	Bacteroidia	Flavobacteriales	Flavobacteriaceae	Aquibacter	NA
ASV_645	15.8846	3.3797	0.541303	6.24363	4.27534e-10	6.41711e-09	Bacteria	Bacteroidota	Bacteroidia	Flavobacteriales	Flavobacteriaceae	Aquibacter	NA
ASV_768	12.6657	3.76598	0.536375	7.02116	2.20034e-12	3.87578e-11	Bacteria	Bacteroidota	Bacteroidia	Flavobacteriales	Flavobacteriaceae	Aquibacter	NA
ASV_826	13.6804	4.7724	0.563233	8.47324	2.38669e-17	5.83528e-16	Bacteria	Bacteroidota	Bacteroidia	Flavobacteriales	Flavobacteriaceae	Aquibacter	NA
ASV_381	23.498	4.92476	0.454888	10.8263	2.58345e-27	1.02774e-25	Bacteria	Bacteroidota	Bacteroidia	Flavobacteriales	Flavobacteriaceae	Aquibacter	NA
ASV_132	47.9547	5.30016	0.450987	11.7524	6.86731e-32	3.28948e-30	Bacteria	Bacteroidota	Bacteroidia	Flavobacteriales	Flavobacteriaceae	Aquibacter	NA
ASV_160	43.9451	5.74384	0.513915	11.1766	5.3064e-29	2.2645e-27	Bacteria	Bacteroidota	Bacteroidia	Flavobacteriales	Flavobacteriaceae	Aquibacter	NA
ASV_1321	6.68273	2.34577	0.538413	4.35683	1.31957e-05	0.000122359	Bacteria	Bacteroidota	Bacteroidia	Flavobacteriales	Flavobacteriaceae	Lutibacter	NA
ASV_3389	3.2399	2.73245	0.504399	5.41724	6.05257e-08	7.42804e-07	Bacteria	Bacteroidota	Bacteroidia	Flavobacteriales	Flavobacteriaceae	Maribacter	NA
ASV_3433	3.47782	2.92679	0.502623	5.82303	5.77914e-09	7.8326e-08	Bacteria	Bacteroidota	Bacteroidia	Flavobacteriales	Flavobacteriaceae	Maribacter	NA
ASV_793	11.749	1.97728	0.576224	3.43144	0.000600378	0.00428642	Bacteria	Bacteroidota	Bacteroidia	Flavobacteriales	Flavobacteriaceae	NA	NA
ASV_422	10.1746	2.20945	0.548073	4.03131	5.54672e-05	0.000472768	Bacteria	Bacteroidota	Bacteroidia	Flavobacteriales	Flavobacteriaceae	NA	NA
ASV_3342	3.69475	3.11894	0.507029	6.1514	7.68014e-10	1.12226e-08	Bacteria	Bacteroidota	Bacteroidia	Flavobacteriales	Flavobacteriaceae	NA	NA
ASV_3284	3.86969	3.25109	0.52784	6.15922	7.3102e-10	1.0707e-08	Bacteria	Bacteroidota	Bacteroidia	Flavobacteriales	Flavobacteriaceae	NA	NA
ASV_1189	7.81635	4.4108	0.569063	7.751	9.11748e-15	1.90433e-13	Bacteria	Bacteroidota	Bacteroidia	Flavobacteriales	Flavobacteriaceae	NA	NA
ASV_1573	8.08226	4.46352	0.610589	7.31019	2.66757e-13	5.07487e-12	Bacteria	Bacteroidota	Bacteroidia	Flavobacteriales	Flavobacteriaceae	NA	NA
ASV_196	38.5779	4.50515	0.458628	9.8231	8.95473e-23	2.87916e-21	Bacteria	Bacteroidota	Bacteroidia	Flavobacteriales	Flavobacteriaceae	NA	NA
ASV_769	11.1682	4.91488	0.567487	8.66078	4.6854e-18	1.19373e-16	Bacteria	Bacteroidota	Bacteroidia	Flavobacteriales	Flavobacteriaceae	NA	NA
ASV_824	15.1709	5.43184	0.615057	8.83145	1.03332e-18	2.72127e-17	Bacteria	Bacteroidota	Bacteroidia	Flavobacteriales	Flavobacteriaceae	NA	NA
ASV_317	25.9472	6.23362	0.512096	12.1728	4.34165e-34	2.33591e-32	Bacteria	Bacteroidota	Bacteroidia	Flavobacteriales	Flavobacteriaceae	NA	NA
ASV_2843	2.54014	2.35755	0.493196	4.78015	1.75165e-06	1.83766e-05	Bacteria	Bacteroidota	Bacteroidia	Flavobacteriales	Flavobacteriaceae	Pseudofulvibacter	NA
ASV_6164	1.81239	1.76377	0.45429	3.88247	0.000103402	0.000846002	Bacteria	Bacteroidota	Bacteroidia	Flavobacteriales	Flavobacteriaceae	Tenacibaculum	skagerrakense
ASV_1035	6.95564	1.96963	0.54659	3.60348	0.000313982	0.00237345	Bacteria	Bacteroidota	Bacteroidia	Flavobacteriales	Flavobacteriaceae	Ulvibacter	NA
ASV_4573	2.34421	2.20294	0.48274	4.56341	5.03304e-06	4.97397e-05	Bacteria	Bacteroidota	Bacteroidia	Flavobacteriales	Flavobacteriaceae	Ulvibacter	NA
ASV_1820	6.24888	2.87856	0.515037	5.58903	2.28338e-08	2.91073e-07	Bacteria	Bacteroidota	Bacteroidia	Flavobacteriales	Flavobacteriaceae	Ulvibacter	NA
ASV_1853	5.51413	3.49719	0.585644	5.97152	2.35047e-09	3.29118e-08	Bacteria	Bacteroidota	Bacteroidia	Flavobacteriales	Flavobacteriaceae	Ulvibacter	NA
ASV_1951	4.69541	1.61471	0.473464	3.41042	0.000648637	0.00460535	Bacteria	Bacteroidota	Bacteroidia	Sphingobacteriales	NS11-12_marine_group	NA	NA
ASV_4878	2.61711	2.53398	0.475135	5.33318	9.65094e-08	1.16164e-06	Bacteria	Bacteroidota	Bacteroidia	Sphingobacteriales	NS11-12_marine_group	NA	NA
ASV_613	12.9806	3.00853	0.524946	5.73113	9.97666e-09	1.32017e-07	Bacteria	Bacteroidota	Ignavibacteria	Ignavibacteriales	PHOS-HE36	NA	NA
ASV_62	73.671	3.02292	0.425079	7.11144	1.14838e-12	2.06544e-11	Bacteria	Bacteroidota	Ignavibacteria	Ignavibacteriales	PHOS-HE36	NA	NA
ASV_179	35.1841	6.26753	0.546371	11.4712	1.84082e-30	8.36926e-29	Bacteria	Bacteroidota	Ignavibacteria	Ignavibacteriales	PHOS-HE36	NA	NA
ASV_6679	1.87536	1.64386	0.481533	3.4138	0.000640644	0.00455441	Bacteria	Bacteroidota	Rhodothermia	Rhodothermales	Rhodothermaceae	NA	NA
ASV_5803	1.80539	1.71882	0.480241	3.57908	0.00034481	0.00258463	Bacteria	Bacteroidota	Rhodothermia	Rhodothermales	Rhodothermaceae	NA	NA
ASV_6054	1.98733	1.72792	0.44278	3.90243	9.52311e-05	0.00078222	Bacteria	Bacteroidota	Rhodothermia	Rhodothermales	Rhodothermaceae	NA	NA
ASV_4925	1.94534	1.92283	0.465074	4.13446	3.55786e-05	0.000312031	Bacteria	Bacteroidota	Rhodothermia	Rhodothermales	Rhodothermaceae	NA	NA
ASV_4546	1.98033	1.93074	0.490516	3.93613	8.28046e-05	0.000686456	Bacteria	Bacteroidota	Rhodothermia	Rhodothermales	Rhodothermaceae	NA	NA
ASV_4031	2.87603	1.97728	0.506096	3.90692	9.34793e-05	0.000769176	Bacteria	Bacteroidota	Rhodothermia	Rhodothermales	Rhodothermaceae	NA	NA
ASV_2476	3.57579	2.02975	0.45917	4.42047	9.84885e-06	9.33528e-05	Bacteria	Bacteroidota	Rhodothermia	Rhodothermales	Rhodothermaceae	NA	NA
ASV_1542	7.14458	2.06609	0.504172	4.09798	4.16764e-05	0.000361458	Bacteria	Bacteroidota	Rhodothermia	Rhodothermales	Rhodothermaceae	NA	NA
ASV_4095	2.25324	2.22882	0.480851	4.63515	3.56676e-06	3.59683e-05	Bacteria	Bacteroidota	Rhodothermia	Rhodothermales	Rhodothermaceae	NA	NA
ASV_3730	2.77806	2.30378	0.453296	5.08229	3.72909e-07	4.23857e-06	Bacteria	Bacteroidota	Rhodothermia	Rhodothermales	Rhodothermaceae	NA	NA
ASV_1406	6.50779	2.3159	0.598524	3.86935	0.000109124	0.000889717	Bacteria	Bacteroidota	Rhodothermia	Rhodothermales	Rhodothermaceae	NA	NA
ASV_2437	3.21891	2.54432	0.557787	4.56145	5.08013e-06	5.01787e-05	Bacteria	Bacteroidota	Rhodothermia	Rhodothermales	Rhodothermaceae	NA	NA
ASV_500	15.8356	2.69116	0.562114	4.78757	1.6881e-06	1.77477e-05	Bacteria	Bacteroidota	Rhodothermia	Rhodothermales	Rhodothermaceae	NA	NA
ASV_2875	3.62477	2.73245	0.489783	5.57889	2.42053e-08	3.07928e-07	Bacteria	Bacteroidota	Rhodothermia	Rhodothermales	Rhodothermaceae	NA	NA
ASV_412	17.746	2.87561	0.405635	7.08915	1.34935e-12	2.41532e-11	Bacteria	Bacteroidota	Rhodothermia	Rhodothermales	Rhodothermaceae	NA	NA
ASV_1369	8.62808	3.10852	0.557384	5.57698	2.44725e-08	3.10906e-07	Bacteria	Bacteroidota	Rhodothermia	Rhodothermales	Rhodothermaceae	NA	NA
ASV_871	10.1815	3.16992	0.510675	6.20732	5.3895e-10	7.98726e-09	Bacteria	Bacteroidota	Rhodothermia	Rhodothermales	Rhodothermaceae	NA	NA
ASV_1460	7.41749	3.37793	0.52779	6.40014	1.55234e-10	2.41694e-09	Bacteria	Bacteroidota	Rhodothermia	Rhodothermales	Rhodothermaceae	NA	NA
ASV_2110	5.64709	3.48918	0.529525	6.58926	4.42024e-11	7.09999e-10	Bacteria	Bacteroidota	Rhodothermia	Rhodothermales	Rhodothermaceae	NA	NA
ASV_1092	9.4538	3.48918	0.506398	6.89019	5.57193e-12	9.57219e-11	Bacteria	Bacteroidota	Rhodothermia	Rhodothermales	Rhodothermaceae	NA	NA
ASV_2815	4.45049	3.49185	0.48373	7.2186	5.25251e-13	9.72647e-12	Bacteria	Bacteroidota	Rhodothermia	Rhodothermales	Rhodothermaceae	NA	NA
ASV_1053	8.5441	3.73696	0.516268	7.23842	4.53939e-13	8.46436e-12	Bacteria	Bacteroidota	Rhodothermia	Rhodothermales	Rhodothermaceae	NA	NA
ASV_655	15.6117	3.98489	0.493841	8.06918	7.07737e-16	1.57455e-14	Bacteria	Bacteroidota	Rhodothermia	Rhodothermales	Rhodothermaceae	NA	NA
ASV_1986	6.36084	4.08037	0.501555	8.13544	4.10444e-16	9.28542e-15	Bacteria	Bacteroidota	Rhodothermia	Rhodothermales	Rhodothermaceae	NA	NA
ASV_1069	10.4545	4.33836	0.513987	8.44062	3.15665e-17	7.66785e-16	Bacteria	Bacteroidota	Rhodothermia	Rhodothermales	Rhodothermaceae	NA	NA
ASV_432	19.9642	4.86005	0.465752	10.4348	1.71893e-25	6.36614e-24	Bacteria	Bacteroidota	Rhodothermia	Rhodothermales	Rhodothermaceae	NA	NA
ASV_503	17.3191	4.9725	0.503267	9.88045	5.06055e-23	1.64683e-21	Bacteria	Bacteroidota	Rhodothermia	Rhodothermales	Rhodothermaceae	NA	NA
ASV_607	17.2422	5.11026	0.505971	10.0999	5.52901e-24	1.89796e-22	Bacteria	Bacteroidota	Rhodothermia	Rhodothermales	Rhodothermaceae	NA	NA
ASV_277	26.3041	5.50842	0.466091	11.8183	3.13806e-32	1.53446e-30	Bacteria	Bacteroidota	Rhodothermia	Rhodothermales	Rhodothermaceae	NA	NA
ASV_240	37.2764	6.73471	0.542655	12.4107	2.28745e-35	1.25589e-33	Bacteria	Bacteroidota	Rhodothermia	Rhodothermales	Rhodothermaceae	NA	NA
ASV_112	54.0147	7.25128	0.561402	12.9164	3.63893e-38	2.23295e-36	Bacteria	Bacteroidota	Rhodothermia	Rhodothermales	Rhodothermaceae	NA	NA
ASV_5417	2.3582	2.03709	0.482839	4.21898	2.45412e-05	0.000220063	Bacteria	Calditrichota	Calditrichia	Calditrichales	Calditrichaceae	Calorithrix	NA
ASV_3853	3.02298	2.33985	0.505252	4.63105	3.63813e-06	3.66291e-05	Bacteria	Calditrichota	Calditrichia	Calditrichales	Calditrichaceae	Calorithrix	NA
ASV_5626	1.69343	1.60486	0.465969	3.44414	0.000572878	0.00410726	Bacteria	Calditrichota	Calditrichia	Calditrichales	Calditrichaceae	JdFR-76	NA
ASV_7846	1.74241	1.67242	0.457605	3.65474	0.000257446	0.00197632	Bacteria	Calditrichota	Calditrichia	Calditrichales	Calditrichaceae	JdFR-76	NA
ASV_3827	2.87603	2.61961	0.450338	5.81698	5.992e-09	8.10604e-08	Bacteria	Calditrichota	Calditrichia	Calditrichales	Calditrichaceae	JdFR-76	NA
ASV_1422	6.45181	3.12584	0.516429	6.0528	1.42349e-09	2.03882e-08	Bacteria	Calditrichota	Calditrichia	Calditrichales	Calditrichaceae	JdFR-76	NA
ASV_1972	4.59744	3.4374	0.504522	6.81318	9.54614e-12	1.60905e-10	Bacteria	Calditrichota	Calditrichia	Calditrichales	Calditrichaceae	JdFR-76	NA
ASV_1557	6.09493	3.56478	0.497267	7.16875	7.56883e-13	1.38654e-11	Bacteria	Calditrichota	Calditrichia	Calditrichales	Calditrichaceae	JdFR-76	NA
ASV_1710	6.07394	3.70044	0.439939	8.41126	4.0562e-17	9.82753e-16	Bacteria	Calditrichota	Calditrichia	Calditrichales	Calditrichaceae	JdFR-76	NA
ASV_147	38.9838	4.90187	0.442289	11.083	1.51778e-28	6.31917e-27	Bacteria	Calditrichota	Calditrichia	Calditrichales	Calditrichaceae	JdFR-76	NA
ASV_674	14.9469	5.08392	0.544446	9.33779	9.8366e-21	2.91788e-19	Bacteria	Calditrichota	Calditrichia	Calditrichales	Calditrichaceae	JdFR-76	NA
ASV_247	34.4283	6.59214	0.457181	14.4191	3.92447e-47	3.00775e-45	Bacteria	Calditrichota	Calditrichia	Calditrichales	Calditrichaceae	JdFR-76	NA
ASV_42	102.697	7.60272	0.399442	19.0334	9.02538e-81	1.58383e-78	Bacteria	Calditrichota	Calditrichia	Calditrichales	Calditrichaceae	JdFR-76	NA
ASV_96	55.904	1.96193	0.452438	4.33635	1.44867e-05	0.000133801	Bacteria	Chloroflexi	Anaerolineae	Anaerolineales	Anaerolineaceae	NA	NA
ASV_5847	1.86137	1.80735	0.458933	3.93817	8.21055e-05	0.000680961	Bacteria	Chloroflexi	Anaerolineae	SBR1031	A4b	NA	NA
ASV_6246	1.96633	1.62449	0.46777	3.47284	0.000514988	0.0037235	Bacteria	Chloroflexi	Anaerolineae	SBR1031	NA	NA	NA
ASV_4435	2.82704	2.56478	0.49437	5.18798	2.12587e-07	2.47781e-06	Bacteria	Chloroflexi	Anaerolineae	SBR1031	NA	NA	NA
ASV_1430	6.10193	2.07325	0.557622	3.71802	0.000200793	0.00156379	Bacteria	Chloroflexi	Dehalococcoidia	S085	NA	NA	NA
ASV_1169	8.46013	2.53916	0.435894	5.82517	5.70532e-09	7.74612e-08	Bacteria	Chloroflexi	Dehalococcoidia	S085	NA	NA	NA
ASV_2147	4.57645	3.24476	0.485414	6.68452	2.31685e-11	3.8161e-10	Bacteria	Chloroflexi	Dehalococcoidia	S085	NA	NA	NA
ASV_148	31.1884	4.24951	0.533097	7.97136	1.56944e-15	3.41475e-14	Bacteria	Chloroflexi	Dehalococcoidia	S085	NA	NA	NA
ASV_1285	9.18789	4.33985	0.598459	7.2517	4.11561e-13	7.70477e-12	Bacteria	Chloroflexi	Dehalococcoidia	S085	NA	NA	NA
ASV_89	50.5859	4.53527	0.438149	10.351	4.14242e-25	1.51918e-23	Bacteria	Chloroflexi	Dehalococcoidia	S085	NA	NA	NA
ASV_4160	2.23224	1.61471	0.485514	3.32577	0.000881736	0.0060735	Bacteria	Chloroflexi	Dehalococcoidia	SAR202_clade	NA	NA	NA
ASV_198	17.2142	1.62019	0.358206	4.52309	6.09446e-06	5.96019e-05	Bacteria	Chloroflexi	Dehalococcoidia	SAR202_clade	NA	NA	NA
ASV_1702	4.53446	1.63421	0.544005	3.00403	0.00266431	0.0165272	Bacteria	Chloroflexi	Dehalococcoidia	SAR202_clade	NA	NA	NA
ASV_2379	4.40151	1.71882	0.539603	3.18534	0.00144585	0.00953579	Bacteria	Chloroflexi	Dehalococcoidia	SAR202_clade	NA	NA	NA
ASV_3508	2.90402	1.73697	0.513463	3.38284	0.000717402	0.00502636	Bacteria	Chloroflexi	Dehalococcoidia	SAR202_clade	NA	NA	NA
ASV_1010	11.2032	1.73697	0.487094	3.56598	0.000362501	0.00270321	Bacteria	Chloroflexi	Dehalococcoidia	SAR202_clade	NA	NA	NA
ASV_2348	4.10061	1.74595	0.523325	3.33627	0.000849104	0.00588543	Bacteria	Chloroflexi	Dehalococcoidia	SAR202_clade	NA	NA	NA
ASV_6148	1.95234	1.79008	0.448697	3.9895	6.62127e-05	0.000557773	Bacteria	Chloroflexi	Dehalococcoidia	SAR202_clade	NA	NA	NA
ASV_1254	9.17389	1.80735	0.464898	3.88764	0.000101224	0.000828549	Bacteria	Chloroflexi	Dehalococcoidia	SAR202_clade	NA	NA	NA
ASV_1762	5.52813	1.80735	0.444195	4.06883	4.72498e-05	0.00040679	Bacteria	Chloroflexi	Dehalococcoidia	SAR202_clade	NA	NA	NA
ASV_3301	2.87603	1.81592	0.527602	3.44183	0.000577797	0.0041378	Bacteria	Chloroflexi	Dehalococcoidia	SAR202_clade	NA	NA	NA
ASV_3833	2.77806	1.86625	0.483175	3.86247	0.000112246	0.000914379	Bacteria	Chloroflexi	Dehalococcoidia	SAR202_clade	NA	NA	NA
ASV_5556	2.20425	1.88264	0.430103	4.37719	1.20221e-05	0.000112085	Bacteria	Chloroflexi	Dehalococcoidia	SAR202_clade	NA	NA	NA
ASV_6274	1.94534	1.89885	0.475425	3.99402	6.49637e-05	0.000548235	Bacteria	Chloroflexi	Dehalococcoidia	SAR202_clade	NA	NA	NA
ASV_6782	1.95234	1.90689	0.449634	4.24098	2.22542e-05	0.000200224	Bacteria	Chloroflexi	Dehalococcoidia	SAR202_clade	NA	NA	NA
ASV_5350	2.20425	1.94642	0.439862	4.42506	9.64138e-06	9.14787e-05	Bacteria	Chloroflexi	Dehalococcoidia	SAR202_clade	NA	NA	NA
ASV_6199	1.97333	1.9542	0.464337	4.20857	2.56988e-05	0.000229674	Bacteria	Chloroflexi	Dehalococcoidia	SAR202_clade	NA	NA	NA
ASV_4693	2.49116	2.00749	0.471617	4.25662	2.07537e-05	0.000187623	Bacteria	Chloroflexi	Dehalococcoidia	SAR202_clade	NA	NA	NA
ASV_6150	2.08529	2.05889	0.476775	4.31838	1.57181e-05	0.000144463	Bacteria	Chloroflexi	Dehalococcoidia	SAR202_clade	NA	NA	NA
ASV_5335	2.37919	2.09452	0.469547	4.46072	8.16855e-06	7.84557e-05	Bacteria	Chloroflexi	Dehalococcoidia	SAR202_clade	NA	NA	NA
ASV_1217	9.21588	2.10154	0.512555	4.10012	4.1294e-05	0.000358473	Bacteria	Chloroflexi	Dehalococcoidia	SAR202_clade	NA	NA	NA
ASV_2841	2.72208	2.13614	0.497925	4.29008	1.78612e-05	0.000163248	Bacteria	Chloroflexi	Dehalococcoidia	SAR202_clade	NA	NA	NA
ASV_4276	2.49116	2.14296	0.455342	4.70626	2.52308e-06	2.6045e-05	Bacteria	Chloroflexi	Dehalococcoidia	SAR202_clade	NA	NA	NA
ASV_1525	6.72472	2.21594	0.475741	4.65787	3.19505e-06	3.24289e-05	Bacteria	Chloroflexi	Dehalococcoidia	SAR202_clade	NA	NA	NA
ASV_1353	8.35517	2.30985	0.512394	4.50797	6.54521e-06	6.37776e-05	Bacteria	Chloroflexi	Dehalococcoidia	SAR202_clade	NA	NA	NA
ASV_1572	5.24822	2.33985	0.52891	4.42391	9.69306e-06	9.19225e-05	Bacteria	Chloroflexi	Dehalococcoidia	SAR202_clade	NA	NA	NA
ASV_3132	4.00264	2.34577	0.549409	4.26963	1.95798e-05	0.000177523	Bacteria	Chloroflexi	Dehalococcoidia	SAR202_clade	NA	NA	NA
ASV_1179	5.54212	2.42626	0.523218	4.6372	3.53162e-06	3.56523e-05	Bacteria	Chloroflexi	Dehalococcoidia	SAR202_clade	NA	NA	NA
ASV_1261	2.86903	2.42626	0.491413	4.93732	7.92034e-07	8.63648e-06	Bacteria	Chloroflexi	Dehalococcoidia	SAR202_clade	NA	NA	NA
ASV_777	11.6301	2.44846	0.524772	4.66576	3.07483e-06	3.12763e-05	Bacteria	Chloroflexi	Dehalococcoidia	SAR202_clade	NA	NA	NA
ASV_3683	3.41484	2.46489	0.553254	4.45525	8.37966e-06	8.036e-05	Bacteria	Chloroflexi	Dehalococcoidia	SAR202_clade	NA	NA	NA
ASV_3408	3.56179	2.48113	0.551438	4.49937	6.81541e-06	6.62386e-05	Bacteria	Chloroflexi	Dehalococcoidia	SAR202_clade	NA	NA	NA
ASV_1396	7.15857	2.5025	0.485884	5.1504	2.59931e-07	3.00168e-06	Bacteria	Chloroflexi	Dehalococcoidia	SAR202_clade	NA	NA	NA
ASV_262	27.0318	2.52356	0.448428	5.62758	1.82759e-08	2.36177e-07	Bacteria	Chloroflexi	Dehalococcoidia	SAR202_clade	NA	NA	NA
ASV_2074	5.63309	2.57491	0.518704	4.96412	6.9014e-07	7.56495e-06	Bacteria	Chloroflexi	Dehalococcoidia	SAR202_clade	NA	NA	NA
ASV_1068	8.71205	2.59991	0.520241	4.99752	5.80737e-07	6.43713e-06	Bacteria	Chloroflexi	Dehalococcoidia	SAR202_clade	NA	NA	NA
ASV_233	24.6946	2.60486	0.437638	5.95209	2.64735e-09	3.69037e-08	Bacteria	Chloroflexi	Dehalococcoidia	SAR202_clade	NA	NA	NA
ASV_2877	4.26855	2.60979	0.549613	4.74842	2.05009e-06	2.1374e-05	Bacteria	Chloroflexi	Dehalococcoidia	SAR202_clade	NA	NA	NA
ASV_3825	3.22591	2.61471	0.501098	5.21796	1.80909e-07	2.12441e-06	Bacteria	Chloroflexi	Dehalococcoidia	SAR202_clade	NA	NA	NA
ASV_1846	5.81503	2.65344	0.504072	5.26401	1.40944e-07	1.67289e-06	Bacteria	Chloroflexi	Dehalococcoidia	SAR202_clade	NA	NA	NA
ASV_3192	3.8207	2.76818	0.487943	5.67317	1.40177e-08	1.8304e-07	Bacteria	Chloroflexi	Dehalococcoidia	SAR202_clade	NA	NA	NA
ASV_3718	3.14893	2.78136	0.470673	5.90932	3.43526e-09	4.74293e-08	Bacteria	Chloroflexi	Dehalococcoidia	SAR202_clade	NA	NA	NA
ASV_190	34.0854	2.82683	0.366833	7.70605	1.29777e-14	2.66903e-13	Bacteria	Chloroflexi	Dehalococcoidia	SAR202_clade	NA	NA	NA
ASV_2703	4.26855	2.85798	0.50811	5.62473	1.85798e-08	2.39775e-07	Bacteria	Chloroflexi	Dehalococcoidia	SAR202_clade	NA	NA	NA
ASV_1233	8.19422	2.87279	0.414033	6.93855	3.96134e-12	6.85548e-11	Bacteria	Chloroflexi	Dehalococcoidia	SAR202_clade	NA	NA	NA
ASV_3350	3.34487	2.95807	0.479353	6.17096	6.78768e-10	9.9728e-09	Bacteria	Chloroflexi	Dehalococcoidia	SAR202_clade	NA	NA	NA
ASV_1331	6.58477	2.97346	0.533965	5.56864	2.56737e-08	3.25507e-07	Bacteria	Chloroflexi	Dehalococcoidia	SAR202_clade	NA	NA	NA
ASV_2935	3.75773	3.06967	0.497217	6.17371	6.67061e-10	9.81614e-09	Bacteria	Chloroflexi	Dehalococcoidia	SAR202_clade	NA	NA	NA
ASV_962	9.97162	3.08037	0.471601	6.53174	6.50099e-11	1.03536e-09	Bacteria	Chloroflexi	Dehalococcoidia	SAR202_clade	NA	NA	NA
ASV_3093	3.79971	3.08392	0.49066	6.28525	3.27333e-10	4.95671e-09	Bacteria	Chloroflexi	Dehalococcoidia	SAR202_clade	NA	NA	NA
ASV_3119	3.94666	3.17659	0.477641	6.65057	2.91958e-11	4.77535e-10	Bacteria	Chloroflexi	Dehalococcoidia	SAR202_clade	NA	NA	NA
ASV_2299	4.35952	3.27922	0.554886	5.90972	3.4269e-09	4.73488e-08	Bacteria	Chloroflexi	Dehalococcoidia	SAR202_clade	NA	NA	NA
ASV_122	49.6902	3.36632	0.444369	7.5755	3.57737e-14	7.17652e-13	Bacteria	Chloroflexi	Dehalococcoidia	SAR202_clade	NA	NA	NA
ASV_1781	5.95498	3.45121	0.571911	6.03452	1.59437e-09	2.27489e-08	Bacteria	Chloroflexi	Dehalococcoidia	SAR202_clade	NA	NA	NA
ASV_1107	9.70571	3.47303	0.51951	6.6852	2.30605e-11	3.80164e-10	Bacteria	Chloroflexi	Dehalococcoidia	SAR202_clade	NA	NA	NA
ASV_1038	9.86666	3.4865	0.510591	6.82836	8.58881e-12	1.45421e-10	Bacteria	Chloroflexi	Dehalococcoidia	SAR202_clade	NA	NA	NA
ASV_1944	4.96132	3.65821	0.445677	8.20822	2.24498e-16	5.16594e-15	Bacteria	Chloroflexi	Dehalococcoidia	SAR202_clade	NA	NA	NA
ASV_1438	7.85834	3.86831	0.463054	8.35391	6.60422e-17	1.5717e-15	Bacteria	Chloroflexi	Dehalococcoidia	SAR202_clade	NA	NA	NA
ASV_789	12.1899	3.99247	0.516563	7.7289	1.08477e-14	2.2482e-13	Bacteria	Chloroflexi	Dehalococcoidia	SAR202_clade	NA	NA	NA
ASV_935	11.0772	4.33241	0.557115	7.7765	7.45576e-15	1.56596e-13	Bacteria	Chloroflexi	Dehalococcoidia	SAR202_clade	NA	NA	NA
ASV_352	21.5877	1.73697	0.466718	3.72166	0.000197917	0.00154395	Bacteria	Chloroflexi	JG30-KF-CM66	NA	NA	NA	NA
ASV_2260	4.24056	1.89077	0.543009	3.48202	0.000497641	0.00361198	Bacteria	Chloroflexi	JG30-KF-CM66	NA	NA	NA	NA
ASV_6370	2.0643	2.05166	0.447248	4.58731	4.49002e-06	4.46552e-05	Bacteria	Chloroflexi	JG30-KF-CM66	NA	NA	NA	NA
ASV_4002	2.24624	2.06609	0.464192	4.45094	8.54971e-06	8.17403e-05	Bacteria	Chloroflexi	JG30-KF-CM66	NA	NA	NA	NA
ASV_3593	2.84104	2.62936	0.485898	5.41134	6.25565e-08	7.66226e-07	Bacteria	Chloroflexi	JG30-KF-CM66	NA	NA	NA	NA
ASV_3234	3.50581	3.04803	0.493371	6.17797	6.4933e-10	9.56273e-09	Bacteria	Chloroflexi	JG30-KF-CM66	NA	NA	NA	NA
ASV_1926	5.40917	2.54946	0.554433	4.59833	4.25894e-06	4.2447e-05	Bacteria	Chloroflexi	TK17	NA	NA	NA	NA
ASV_1701	5.54912	1.63421	0.539662	3.0282	0.00246012	0.015395	Bacteria	Dadabacteria	Dadabacteriia	Dadabacteriales	NA	NA	NA
ASV_2269	4.47148	1.63421	0.449059	3.63918	0.000273512	0.00209024	Bacteria	Dadabacteria	Dadabacteriia	Dadabacteriales	NA	NA	NA
ASV_6889	1.86837	1.83289	0.413397	4.43373	9.26168e-06	8.81674e-05	Bacteria	Dadabacteria	Dadabacteriia	Dadabacteriales	NA	NA	NA
ASV_4890	2.12728	1.87447	0.459857	4.0762	4.5778e-05	0.000394662	Bacteria	Dadabacteria	Dadabacteriia	Dadabacteriales	NA	NA	NA
ASV_6678	1.98033	1.92283	0.470054	4.09066	4.30146e-05	0.000372721	Bacteria	Dadabacteria	Dadabacteriia	Dadabacteriales	NA	NA	NA
ASV_6298	2.00832	1.94642	0.504259	3.85996	0.000113408	0.000922285	Bacteria	Dadabacteria	Dadabacteriia	Dadabacteriales	NA	NA	NA
ASV_527	15.4158	2.07325	0.441686	4.69395	2.67985e-06	2.75421e-05	Bacteria	Dadabacteria	Dadabacteriia	Dadabacteriales	NA	NA	NA
ASV_2472	3.75773	2.42626	0.514837	4.71268	2.44475e-06	2.52921e-05	Bacteria	Dadabacteria	Dadabacteriia	Dadabacteriales	NA	NA	NA
ASV_1599	6.45881	2.43184	0.590216	4.12026	3.78446e-05	0.000330208	Bacteria	Dadabacteria	Dadabacteriia	Dadabacteriales	NA	NA	NA
ASV_4713	2.6451	2.52356	0.50577	4.98954	6.05228e-07	6.68886e-06	Bacteria	Dadabacteria	Dadabacteriia	Dadabacteriales	NA	NA	NA
ASV_3155	3.29588	2.8413	0.504339	5.63371	1.76375e-08	2.28558e-07	Bacteria	Dadabacteria	Dadabacteriia	Dadabacteriales	NA	NA	NA
ASV_3218	3.28889	2.9542	0.506508	5.83248	5.461e-09	7.41976e-08	Bacteria	Dadabacteria	Dadabacteriia	Dadabacteriales	NA	NA	NA
ASV_2973	3.5408	3.09099	0.545654	5.66475	1.47242e-08	1.91997e-07	Bacteria	Dadabacteria	Dadabacteriia	Dadabacteriales	NA	NA	NA
ASV_2603	4.03763	3.31288	0.518453	6.38994	1.65951e-10	2.57314e-09	Bacteria	Dadabacteria	Dadabacteriia	Dadabacteriales	NA	NA	NA
ASV_1127	8.93597	3.89482	0.511532	7.61402	2.65707e-14	5.35894e-13	Bacteria	Dadabacteria	Dadabacteriia	Dadabacteriales	NA	NA	NA
ASV_529	16.5354	3.94642	0.513322	7.688	1.49451e-14	3.06359e-13	Bacteria	Dadabacteria	Dadabacteriia	Dadabacteriales	NA	NA	NA
ASV_1593	7.46647	4.112	0.570334	7.20981	5.60296e-13	1.03245e-11	Bacteria	Dadabacteria	Dadabacteriia	Dadabacteriales	NA	NA	NA
ASV_1091	8.63507	4.47303	0.546772	8.18078	2.82001e-16	6.44177e-15	Bacteria	Dadabacteria	Dadabacteriia	Dadabacteriales	NA	NA	NA
ASV_730	13.6174	5.26444	0.463559	11.3566	6.87839e-30	3.05332e-28	Bacteria	Dadabacteria	Dadabacteriia	Dadabacteriales	NA	NA	NA
ASV_210	36.1008	5.54946	0.409706	13.545	8.48285e-42	5.75027e-40	Bacteria	Dadabacteria	Dadabacteriia	Dadabacteriales	NA	NA	NA
ASV_241	29.2501	5.58245	0.588128	9.4919	2.26854e-21	6.90379e-20	Bacteria	Dadabacteria	Dadabacteriia	Dadabacteriales	NA	NA	NA
ASV_51	87.8762	5.9542	0.396856	15.0034	6.97321e-51	6.09275e-49	Bacteria	Dadabacteria	Dadabacteriia	Dadabacteriales	NA	NA	NA
ASV_417	22.4834	5.97966	0.560594	10.6667	1.45775e-26	5.60904e-25	Bacteria	Dadabacteria	Dadabacteriia	Dadabacteriales	NA	NA	NA
ASV_288	30.5866	6.29882	0.49091	12.8309	1.10059e-37	6.58145e-36	Bacteria	Dadabacteria	Dadabacteriia	Dadabacteriales	NA	NA	NA
ASV_188	38.6969	6.32568	0.558285	11.3306	9.26193e-30	4.08242e-28	Bacteria	Dadabacteria	Dadabacteriia	Dadabacteriales	NA	NA	NA
ASV_127	43.0634	6.67684	0.559989	11.9232	8.96432e-33	4.50061e-31	Bacteria	Dadabacteria	Dadabacteriia	Dadabacteriales	NA	NA	NA
ASV_2751	2.00132	1.75489	0.501145	3.50176	0.000462199	0.00337168	Bacteria	Dependentiae	Babeliae	Babeliales	Vermiphilaceae	NA	NA
ASV_6492	1.93135	1.87447	0.469264	3.99448	6.48351e-05	0.000547596	Bacteria	Dependentiae	Babeliae	Babeliales	Vermiphilaceae	NA	NA
ASV_4011	2.3512	1.63421	0.505269	3.23433	0.0012193	0.00815342	Bacteria	Desulfobacterota	NA	NA	NA	NA	NA
ASV_6727	1.88236	1.79008	0.452455	3.95636	7.60997e-05	0.00063438	Bacteria	Desulfobacterota	NA	NA	NA	NA	NA
ASV_4803	2.46317	2.32193	0.446822	5.19653	2.0304e-07	2.37537e-06	Bacteria	Desulfobacterota	NA	NA	NA	NA	NA
ASV_2640	3.76472	2.45396	0.510677	4.8053	1.54518e-06	1.63091e-05	Bacteria	Desulfobacterota	NA	NA	NA	NA	NA
ASV_4555	2.71508	2.56985	0.500962	5.12984	2.89992e-07	3.33242e-06	Bacteria	Desulfobacterota	NA	NA	NA	NA	NA
ASV_2524	4.77938	3.53398	0.489671	7.21705	5.31271e-13	9.81857e-12	Bacteria	Desulfobacterota	NA	NA	NA	NA	NA
ASV_1374	6.92765	1.83289	0.461319	3.97315	7.09281e-05	0.000594031	Bacteria	Elusimicrobiota	Elusimicrobia	MVP-88	NA	NA	NA
ASV_2715	4.28255	2.01495	0.52567	3.83311	0.000126533	0.00102015	Bacteria	Entotheonellaeota	Entotheonellia	Entotheonellales	Entotheonellaceae	NA	NA
ASV_2018	5.68907	3.77039	0.522765	7.2124	5.49751e-13	1.01501e-11	Bacteria	Entotheonellaeota	Entotheonellia	Entotheonellales	Entotheonellaceae	NA	NA
ASV_1273	8.15224	4.00375	0.479549	8.34899	6.88482e-17	1.63022e-15	Bacteria	Entotheonellaeota	Entotheonellia	Entotheonellales	Entotheonellaceae	NA	NA
ASV_6104	2.0643	1.78136	0.464424	3.83563	0.000125243	0.00101061	Bacteria	Firmicutes	Bacilli	Bacillales	Planococcaceae	Jeotgalibacillus	campisalis
ASV_616	13.9813	3.9386	0.492783	7.99256	1.32163e-15	2.90249e-14	Bacteria	Firmicutes	NA	NA	NA	NA	NA
ASV_5389	1.84038	1.60486	0.441661	3.6337	0.000279389	0.00213256	Bacteria	Gemmatimonadota	BD2-11_terrestrial_group	NA	NA	NA	NA
ASV_724	9.58675	1.69116	0.459685	3.67896	0.000234188	0.00180738	Bacteria	Gemmatimonadota	BD2-11_terrestrial_group	NA	NA	NA	NA
ASV_335	15.7657	1.73741	0.32769	5.30199	1.1455e-07	1.37088e-06	Bacteria	Gemmatimonadota	BD2-11_terrestrial_group	NA	NA	NA	NA
ASV_5872	1.87536	1.8413	0.44567	4.13154	3.60339e-05	0.000315583	Bacteria	Gemmatimonadota	BD2-11_terrestrial_group	NA	NA	NA	NA
ASV_1511	7.41749	1.96193	0.475464	4.12635	3.68565e-05	0.000322186	Bacteria	Gemmatimonadota	BD2-11_terrestrial_group	NA	NA	NA	NA
ASV_717	12.3368	2.01495	0.473983	4.2511	2.1272e-05	0.000191938	Bacteria	Gemmatimonadota	BD2-11_terrestrial_group	NA	NA	NA	NA
ASV_1598	6.86467	2.03709	0.525018	3.88004	0.000104441	0.000853763	Bacteria	Gemmatimonadota	BD2-11_terrestrial_group	NA	NA	NA	NA
ASV_144	38.424	2.22041	0.284291	7.81035	5.70298e-15	1.20727e-13	Bacteria	Gemmatimonadota	BD2-11_terrestrial_group	NA	NA	NA	NA
ASV_787	11.0702	2.23522	0.506424	4.41372	1.01609e-05	9.61531e-05	Bacteria	Gemmatimonadota	BD2-11_terrestrial_group	NA	NA	NA	NA
ASV_5762	2.26723	2.24793	0.478796	4.69495	2.66667e-06	2.74217e-05	Bacteria	Gemmatimonadota	BD2-11_terrestrial_group	NA	NA	NA	NA
ASV_1915	3.47782	2.52878	0.536761	4.71119	2.46279e-06	2.54506e-05	Bacteria	Gemmatimonadota	BD2-11_terrestrial_group	NA	NA	NA	NA
ASV_4867	2.6521	2.55969	0.508067	5.0381	4.70173e-07	5.27386e-06	Bacteria	Gemmatimonadota	BD2-11_terrestrial_group	NA	NA	NA	NA
ASV_476	15.2128	2.60942	0.400764	6.5111	7.46003e-11	1.18208e-09	Bacteria	Gemmatimonadota	BD2-11_terrestrial_group	NA	NA	NA	NA
ASV_2320	3.50581	2.62449	0.507844	5.1679	2.36735e-07	2.74733e-06	Bacteria	Gemmatimonadota	BD2-11_terrestrial_group	NA	NA	NA	NA
ASV_3519	2.939	2.62936	0.49655	5.29525	1.18855e-07	1.41968e-06	Bacteria	Gemmatimonadota	BD2-11_terrestrial_group	NA	NA	NA	NA
ASV_1647	5.87801	2.76818	0.467089	5.92646	3.09542e-09	4.3022e-08	Bacteria	Gemmatimonadota	BD2-11_terrestrial_group	NA	NA	NA	NA
ASV_3043	3.75073	2.94642	0.479927	6.13931	8.28802e-10	1.20826e-08	Bacteria	Gemmatimonadota	BD2-11_terrestrial_group	NA	NA	NA	NA
ASV_280	28.1375	3.083	0.421693	7.311	2.65152e-13	5.04946e-12	Bacteria	Gemmatimonadota	BD2-11_terrestrial_group	NA	NA	NA	NA
ASV_355	21.3498	3.28573	0.385017	8.53398	1.41394e-17	3.51186e-16	Bacteria	Gemmatimonadota	BD2-11_terrestrial_group	NA	NA	NA	NA
ASV_322	19.9922	3.35573	0.422532	7.94196	1.99011e-15	4.31007e-14	Bacteria	Gemmatimonadota	BD2-11_terrestrial_group	NA	NA	NA	NA
ASV_149	35.0791	3.52878	0.413388	8.53623	1.38668e-17	3.45328e-16	Bacteria	Gemmatimonadota	BD2-11_terrestrial_group	NA	NA	NA	NA
ASV_256	24.2888	3.80521	0.477233	7.97348	1.54271e-15	3.3605e-14	Bacteria	Gemmatimonadota	BD2-11_terrestrial_group	NA	NA	NA	NA
ASV_526	15.6747	3.8095	0.514813	7.39978	1.36414e-13	2.64611e-12	Bacteria	Gemmatimonadota	BD2-11_terrestrial_group	NA	NA	NA	NA
ASV_473	18.8446	4.08746	0.46657	8.76067	1.94098e-18	5.03363e-17	Bacteria	Gemmatimonadota	BD2-11_terrestrial_group	NA	NA	NA	NA
ASV_207	32.42	4.92184	0.413759	11.8954	1.25013e-32	6.22646e-31	Bacteria	Gemmatimonadota	BD2-11_terrestrial_group	NA	NA	NA	NA
ASV_2651	2.77106	1.59495	0.449424	3.54887	0.000386892	0.00287028	Bacteria	Gemmatimonadota	Gemmatimonadetes	Gemmatimonadales	Gemmatimonadaceae	NA	NA
ASV_3116	1.70042	1.61471	0.461229	3.50089	0.000463714	0.00338142	Bacteria	Gemmatimonadota	Gemmatimonadetes	Gemmatimonadales	Gemmatimonadaceae	NA	NA
ASV_3895	2.74307	1.67242	0.43787	3.81945	0.000133748	0.00107462	Bacteria	Gemmatimonadota	Gemmatimonadetes	Gemmatimonadales	Gemmatimonadaceae	NA	NA
ASV_2532	3.67375	1.67242	0.445467	3.75432	0.000173816	0.00136959	Bacteria	Gemmatimonadota	Gemmatimonadetes	Gemmatimonadales	Gemmatimonadaceae	NA	NA
ASV_1283	5.54212	1.68182	0.491461	3.42209	0.000621417	0.00442822	Bacteria	Gemmatimonadota	Gemmatimonadetes	Gemmatimonadales	Gemmatimonadaceae	NA	NA
ASV_2307	3.5548	1.71882	0.523808	3.28139	0.00103298	0.00702764	Bacteria	Gemmatimonadota	Gemmatimonadetes	Gemmatimonadales	Gemmatimonadaceae	NA	NA
ASV_932	7.60642	1.72792	0.481515	3.58851	0.000332579	0.00250193	Bacteria	Gemmatimonadota	Gemmatimonadetes	Gemmatimonadales	Gemmatimonadaceae	NA	NA
ASV_2566	4.19158	1.78136	0.48289	3.68895	0.00022518	0.00174143	Bacteria	Gemmatimonadota	Gemmatimonadetes	Gemmatimonadales	Gemmatimonadaceae	NA	NA
ASV_3988	2.84104	1.87447	0.47344	3.95925	7.51845e-05	0.000627719	Bacteria	Gemmatimonadota	Gemmatimonadetes	Gemmatimonadales	Gemmatimonadaceae	NA	NA
ASV_1202	9.06893	1.90105	0.426092	4.4616	8.13516e-06	7.82551e-05	Bacteria	Gemmatimonadota	Gemmatimonadetes	Gemmatimonadales	Gemmatimonadaceae	NA	NA
ASV_4423	2.47716	1.99247	0.417141	4.77648	1.78394e-06	1.86925e-05	Bacteria	Gemmatimonadota	Gemmatimonadetes	Gemmatimonadales	Gemmatimonadaceae	NA	NA
ASV_1400	6.09493	2.04439	0.488372	4.18614	2.83741e-05	0.000252264	Bacteria	Gemmatimonadota	Gemmatimonadetes	Gemmatimonadales	Gemmatimonadaceae	NA	NA
ASV_414	15.3318	2.09452	0.473058	4.42761	9.52822e-06	9.0588e-05	Bacteria	Gemmatimonadota	Gemmatimonadetes	Gemmatimonadales	Gemmatimonadaceae	NA	NA
ASV_4453	2.6451	2.1224	0.46853	4.52991	5.90095e-06	5.77998e-05	Bacteria	Gemmatimonadota	Gemmatimonadetes	Gemmatimonadales	Gemmatimonadaceae	NA	NA
ASV_2285	4.45049	2.39803	0.449288	5.3374	9.4289e-08	1.13564e-06	Bacteria	Gemmatimonadota	Gemmatimonadetes	Gemmatimonadales	Gemmatimonadaceae	NA	NA
ASV_2720	3.94666	2.52733	0.46043	5.48907	4.04055e-08	5.0278e-07	Bacteria	Gemmatimonadota	Gemmatimonadetes	Gemmatimonadales	Gemmatimonadaceae	NA	NA
ASV_2444	2.79205	2.65821	0.512213	5.18966	2.10679e-07	2.45862e-06	Bacteria	Gemmatimonadota	Gemmatimonadetes	Gemmatimonadales	Gemmatimonadaceae	NA	NA
ASV_2649	4.02364	2.93074	0.501107	5.84853	4.95942e-09	6.77258e-08	Bacteria	Gemmatimonadota	Gemmatimonadetes	Gemmatimonadales	Gemmatimonadaceae	NA	NA
ASV_3902	3.26789	2.94251	0.519721	5.66172	1.49862e-08	1.95279e-07	Bacteria	Gemmatimonadota	Gemmatimonadetes	Gemmatimonadales	Gemmatimonadaceae	NA	NA
ASV_578	13.9743	3.09452	0.527743	5.86368	4.52711e-09	6.20932e-08	Bacteria	Gemmatimonadota	Gemmatimonadetes	Gemmatimonadales	Gemmatimonadaceae	NA	NA
ASV_1356	5.78004	3.27612	0.544559	6.01611	1.78663e-09	2.53572e-08	Bacteria	Gemmatimonadota	Gemmatimonadetes	Gemmatimonadales	Gemmatimonadaceae	NA	NA
ASV_589	9.36982	3.79874	0.484392	7.84229	4.42409e-15	9.41851e-14	Bacteria	Gemmatimonadota	Gemmatimonadetes	Gemmatimonadales	Gemmatimonadaceae	NA	NA
ASV_505	16.9972	4.14125	0.46786	8.85148	8.63639e-19	2.28081e-17	Bacteria	Gemmatimonadota	Gemmatimonadetes	Gemmatimonadales	Gemmatimonadaceae	NA	NA
ASV_450	20.4891	4.6677	0.534052	8.74016	2.32786e-18	6.01242e-17	Bacteria	Gemmatimonadota	Gemmatimonadetes	Gemmatimonadales	Gemmatimonadaceae	NA	NA
ASV_71	50.9987	4.68241	0.418041	11.2008	4.03934e-29	1.7436e-27	Bacteria	Gemmatimonadota	Gemmatimonadetes	Gemmatimonadales	Gemmatimonadaceae	NA	NA
ASV_641	16.7243	4.79201	0.516866	9.27128	1.83934e-20	5.37126e-19	Bacteria	Gemmatimonadota	Gemmatimonadetes	Gemmatimonadales	Gemmatimonadaceae	NA	NA
ASV_7767	1.7564	1.69116	0.451361	3.74681	0.000179099	0.00140827	Bacteria	Gemmatimonadota	PAUC43f_marine_benthic_group	NA	NA	NA	NA
ASV_3973	2.70808	1.79874	0.527972	3.40689	0.000657083	0.00465587	Bacteria	Gemmatimonadota	PAUC43f_marine_benthic_group	NA	NA	NA	NA
ASV_6642	1.90335	1.8413	0.461524	3.98961	6.61816e-05	0.000557761	Bacteria	Gemmatimonadota	PAUC43f_marine_benthic_group	NA	NA	NA	NA
ASV_1975	5.45115	1.86625	0.520839	3.58315	0.00033947	0.00254867	Bacteria	Gemmatimonadota	PAUC43f_marine_benthic_group	NA	NA	NA	NA
ASV_4173	2.99498	2.33985	0.531264	4.4043	1.06124e-05	9.94852e-05	Bacteria	Gemmatimonadota	PAUC43f_marine_benthic_group	NA	NA	NA	NA
ASV_3474	2.49116	2.4374	0.50859	4.79248	1.64736e-06	1.73291e-05	Bacteria	Gemmatimonadota	PAUC43f_marine_benthic_group	NA	NA	NA	NA
ASV_4351	2.953	2.76376	0.5199	5.31595	1.06101e-07	1.27301e-06	Bacteria	Gemmatimonadota	PAUC43f_marine_benthic_group	NA	NA	NA	NA
ASV_2704	3.18392	2.90288	0.498513	5.82307	5.77749e-09	7.8326e-08	Bacteria	Gemmatimonadota	PAUC43f_marine_benthic_group	NA	NA	NA	NA
ASV_838	7.46647	3.02237	0.614299	4.92002	8.65333e-07	9.38669e-06	Bacteria	Gemmatimonadota	PAUC43f_marine_benthic_group	NA	NA	NA	NA
ASV_2324	5.0033	3.56732	0.486936	7.32606	2.37021e-13	4.53674e-12	Bacteria	Gemmatimonadota	PAUC43f_marine_benthic_group	NA	NA	NA	NA
ASV_2604	4.86335	3.64145	0.544632	6.68607	2.29237e-11	3.7824e-10	Bacteria	Gemmatimonadota	PAUC43f_marine_benthic_group	NA	NA	NA	NA
ASV_2440	4.91933	3.65821	0.551928	6.62806	3.40125e-11	5.52467e-10	Bacteria	Gemmatimonadota	PAUC43f_marine_benthic_group	NA	NA	NA	NA
ASV_766	10.1326	3.70966	0.498628	7.43973	1.00891e-13	1.96722e-12	Bacteria	Gemmatimonadota	PAUC43f_marine_benthic_group	NA	NA	NA	NA
ASV_508	17.634	3.8009	0.530414	7.16592	7.7268e-13	1.41272e-11	Bacteria	Gemmatimonadota	PAUC43f_marine_benthic_group	NA	NA	NA	NA
ASV_316	26.4021	3.93271	0.56009	7.02156	2.19412e-12	3.86845e-11	Bacteria	Gemmatimonadota	PAUC43f_marine_benthic_group	NA	NA	NA	NA
ASV_582	16.3814	4.35314	0.606407	7.17859	7.04346e-13	1.29155e-11	Bacteria	Gemmatimonadota	PAUC43f_marine_benthic_group	NA	NA	NA	NA
ASV_501	19.8243	4.42626	0.492736	8.98303	2.63411e-19	7.21002e-18	Bacteria	Gemmatimonadota	PAUC43f_marine_benthic_group	NA	NA	NA	NA
ASV_353	29.7329	6.30985	0.560513	11.2573	2.13238e-29	9.31158e-28	Bacteria	Gemmatimonadota	PAUC43f_marine_benthic_group	NA	NA	NA	NA
ASV_4706	2.3582	1.71882	0.446106	3.85294	0.00011671	0.000947867	Bacteria	Hydrogenedentes	Hydrogenedentia	Hydrogenedentiales	Hydrogenedensaceae	NA	NA
ASV_2642	3.14193	2.16323	0.512275	4.22279	2.41293e-05	0.000216472	Bacteria	Hydrogenedentes	Hydrogenedentia	Hydrogenedentiales	Hydrogenedensaceae	NA	NA
ASV_2332	4.68841	2.52356	0.575325	4.38632	1.15284e-05	0.000107642	Bacteria	Latescibacterota	Latescibacteria	Latescibacterales	Latescibacteraceae	NA	NA
ASV_1785	5.92699	2.76376	0.562161	4.91632	8.81865e-07	9.55498e-06	Bacteria	Latescibacterota	Latescibacteria	Latescibacterales	Latescibacteraceae	NA	NA
ASV_3253	3.75073	2.50779	0.586213	4.27796	1.88615e-05	0.000171673	Bacteria	MBNT15	NA	NA	NA	NA	NA
ASV_117	35.31	3.02237	0.522084	5.78905	7.07869e-09	9.5486e-08	Bacteria	Methylomirabilota	Methylomirabilia	Methylomirabilales	Methylomirabilaceae	wb1-A12	NA
ASV_216	43.6372	3.07681	0.755429	4.07293	4.64247e-05	0.000400054	Bacteria	Methylomirabilota	Methylomirabilia	Methylomirabilales	Methylomirabilaceae	wb1-A12	NA
ASV_93	47.6119	4.48516	0.562435	7.97454	1.52951e-15	3.33561e-14	Bacteria	Methylomirabilota	Methylomirabilia	Methylomirabilales	Methylomirabilaceae	wb1-A12	NA
ASV_3836	2.89702	1.70966	0.51355	3.3291	0.000871272	0.00601024	Bacteria	Myxococcota	bacteriap25	NA	NA	NA	NA
ASV_683	11.2032	1.76377	0.466431	3.78141	0.000155944	0.00123917	Bacteria	Myxococcota	bacteriap25	NA	NA	NA	NA
ASV_4360	2.82704	2	0.552111	3.62246	0.000291815	0.00222019	Bacteria	Myxococcota	bacteriap25	NA	NA	NA	NA
ASV_3316	3.14893	2.03709	0.490385	4.15406	3.26632e-05	0.000287807	Bacteria	Myxococcota	bacteriap25	NA	NA	NA	NA
ASV_790	10.1186	2.08746	0.527145	3.95994	7.49687e-05	0.000626474	Bacteria	Myxococcota	bacteriap25	NA	NA	NA	NA
ASV_2015	4.28955	2.18322	0.470972	4.63556	3.55967e-06	3.59161e-05	Bacteria	Myxococcota	bacteriap25	NA	NA	NA	NA
ASV_2735	2.96699	2.21594	0.518123	4.27686	1.89552e-05	0.000172442	Bacteria	Myxococcota	bacteriap25	NA	NA	NA	NA
ASV_1779	6.05995	2.22882	0.611752	3.64334	0.000269128	0.00205926	Bacteria	Myxococcota	bacteriap25	NA	NA	NA	NA
ASV_170	28.2774	2.3159	0.524734	4.41348	1.01723e-05	9.61758e-05	Bacteria	Myxococcota	bacteriap25	NA	NA	NA	NA
ASV_1149	7.78136	2.37504	0.610016	3.8934	9.88471e-05	0.000810149	Bacteria	Myxococcota	bacteriap25	NA	NA	NA	NA
ASV_676	10.9933	2.48113	0.504002	4.92285	8.52925e-07	9.27352e-06	Bacteria	Myxococcota	bacteriap25	NA	NA	NA	NA
ASV_1213	8.15224	2.49185	0.51168	4.86994	1.11632e-06	1.19369e-05	Bacteria	Myxococcota	bacteriap25	NA	NA	NA	NA
ASV_4053	2.98099	2.58496	0.510059	5.06797	4.02085e-07	4.55915e-06	Bacteria	Myxococcota	bacteriap25	NA	NA	NA	NA
ASV_137	30.1878	2.82866	0.510333	5.54278	2.97701e-08	3.73658e-07	Bacteria	Myxococcota	bacteriap25	NA	NA	NA	NA
ASV_187	33.1198	3.04166	0.467755	6.50267	7.89054e-11	1.24819e-09	Bacteria	Myxococcota	bacteriap25	NA	NA	NA	NA
ASV_2673	4.74439	3.56732	0.528678	6.74763	1.50283e-11	2.50166e-10	Bacteria	Myxococcota	bacteriap25	NA	NA	NA	NA
ASV_840	8.04727	3.85175	0.547165	7.03946	1.92989e-12	3.41863e-11	Bacteria	Myxococcota	bacteriap25	NA	NA	NA	NA
ASV_173	32.0281	4.13614	0.471884	8.76516	1.86511e-18	4.85057e-17	Bacteria	Myxococcota	bacteriap25	NA	NA	NA	NA
ASV_102	56.3309	6.23042	0.445956	13.9709	2.34534e-44	1.69379e-42	Bacteria	Myxococcota	bacteriap25	NA	NA	NA	NA
ASV_5760	2.12028	1.61471	0.449052	3.59582	0.000323369	0.00244047	Bacteria	Myxococcota	Polyangia	Haliangiales	Haliangiaceae	Haliangium	NA
ASV_7476	1.7564	1.69116	0.446467	3.78788	0.00015194	0.0012094	Bacteria	Myxococcota	Polyangia	Haliangiales	Haliangiaceae	Haliangium	NA
ASV_7356	1.7844	1.70044	0.440392	3.8612	0.000112834	0.000918368	Bacteria	Myxococcota	Polyangia	Haliangiales	Haliangiaceae	Haliangium	NA
ASV_4889	2.00132	1.91488	0.484997	3.94824	7.87289e-05	0.000655271	Bacteria	Myxococcota	Polyangia	Haliangiales	Haliangiaceae	Haliangium	NA
ASV_5481	2.0503	1.99247	0.441735	4.51054	6.46614e-06	6.30726e-05	Bacteria	Myxococcota	Polyangia	Haliangiales	Haliangiaceae	Haliangium	NA
ASV_2358	5.15725	3.73922	0.483261	7.73747	1.01418e-14	2.10656e-13	Bacteria	Myxococcota	Polyangia	Haliangiales	Haliangiaceae	Haliangium	NA
ASV_6339	1.83338	1.77259	0.436442	4.06145	4.87689e-05	0.000418908	Bacteria	Myxococcota	Polyangia	Polyangiales	Eel-36e1D6	NA	NA
ASV_4381	2.6661	2.18982	0.440124	4.97547	6.50905e-07	7.15996e-06	Bacteria	Myxococcota	Polyangia	Polyangiales	Eel-36e1D6	NA	NA
ASV_621	13.5684	3.92481	0.502356	7.81281	5.59268e-15	1.18526e-13	Bacteria	Myxococcota	Polyangia	Polyangiales	Sandaracinaceae	NA	NA
ASV_1724	7.02562	4.06069	0.615157	6.60107	4.08198e-11	6.58762e-10	Bacteria	Myxococcota	Polyangia	Polyangiales	Sandaracinaceae	NA	NA
ASV_1848	6.94864	4.224	0.546974	7.72249	1.14082e-14	2.35656e-13	Bacteria	Myxococcota	Polyangia	Polyangiales	Sandaracinaceae	NA	NA
ASV_106	51.9714	5.13186	0.430605	11.9178	9.56065e-33	4.78721e-31	Bacteria	Myxococcota	Polyangia	Polyangiales	Sandaracinaceae	NA	NA
ASV_6344	2.00832	1.64386	0.444016	3.70224	0.000213701	0.00165607	Bacteria	Myxococcota	Polyangia	Polyangiales	Sandaracinaceae	Sandaracinus	NA
ASV_6812	1.88936	1.70044	0.429547	3.95868	7.53643e-05	0.000628661	Bacteria	Myxococcota	Polyangia	Polyangiales	Sandaracinaceae	Sandaracinus	NA
ASV_5590	1.98733	1.84967	0.409255	4.51959	6.19585e-06	6.05305e-05	Bacteria	Myxococcota	Polyangia	Polyangiales	Sandaracinaceae	Sandaracinus	NA
ASV_2765	4.08661	1.87447	0.521147	3.59681	0.000322143	0.0024322	Bacteria	NA	NA	NA	NA	NA	NA
ASV_2173	4.68141	1.9386	0.519464	3.73192	0.000190027	0.0014861	Bacteria	NA	NA	NA	NA	NA	NA
ASV_5061	2.53314	2.35755	0.516323	4.56604	4.97033e-06	4.91717e-05	Bacteria	NA	NA	NA	NA	NA	NA
ASV_2940	4.23356	3.18982	0.50797	6.27956	3.3954e-10	5.13329e-09	Bacteria	NA	NA	NA	NA	NA	NA
ASV_2518	4.97531	3.39232	0.571312	5.93777	2.88929e-09	4.01868e-08	Bacteria	NA	NA	NA	NA	NA	NA
ASV_3461	2.939	1.59495	0.477733	3.33857	0.000842099	0.00584335	Bacteria	NB1-j	NA	NA	NA	NA	NA
ASV_1948	6.01096	1.59495	0.447953	3.56052	0.000370119	0.00275564	Bacteria	NB1-j	NA	NA	NA	NA	NA
ASV_2871	2.30222	1.63421	0.471227	3.46798	0.000524391	0.0037842	Bacteria	NB1-j	NA	NA	NA	NA	NA
ASV_2982	3.8347	1.65344	0.466496	3.54439	0.000393526	0.00291719	Bacteria	NB1-j	NA	NA	NA	NA	NA
ASV_878	11.854	1.68182	0.431187	3.90045	9.60152e-05	0.000788315	Bacteria	NB1-j	NA	NA	NA	NA	NA
ASV_4616	2.0573	1.70044	0.476337	3.56982	0.000357224	0.00266781	Bacteria	NB1-j	NA	NA	NA	NA	NA
ASV_7549	1.7774	1.71882	0.460655	3.73124	0.000190536	0.00148947	Bacteria	NB1-j	NA	NA	NA	NA	NA
ASV_1579	7.25654	1.74595	0.454107	3.84481	0.000120646	0.000978984	Bacteria	NB1-j	NA	NA	NA	NA	NA
ASV_3367	3.10695	1.75489	0.535141	3.2793	0.00104066	0.00707221	Bacteria	NB1-j	NA	NA	NA	NA	NA
ASV_2694	3.8487	1.75489	0.422176	4.15676	3.2279e-05	0.000284555	Bacteria	NB1-j	NA	NA	NA	NA	NA
ASV_1507	6.55678	1.76377	0.471946	3.73722	0.000186066	0.00145756	Bacteria	NB1-j	NA	NA	NA	NA	NA
ASV_783	6.66874	1.77259	0.519254	3.41372	0.000640824	0.00455441	Bacteria	NB1-j	NA	NA	NA	NA	NA
ASV_667	14.1492	1.79008	0.549578	3.25718	0.00112524	0.00756756	Bacteria	NB1-j	NA	NA	NA	NA	NA
ASV_4475	2.6521	1.79874	0.469905	3.82788	0.00012925	0.00103996	Bacteria	NB1-j	NA	NA	NA	NA	NA
ASV_5088	2.40718	1.81592	0.447409	4.05874	4.9339e-05	0.000423031	Bacteria	NB1-j	NA	NA	NA	NA	NA
ASV_5646	1.99432	1.84967	0.464639	3.98087	6.86639e-05	0.000576096	Bacteria	NB1-j	NA	NA	NA	NA	NA
ASV_5795	1.98733	1.84967	0.429171	4.30986	1.63361e-05	0.00015007	Bacteria	NB1-j	NA	NA	NA	NA	NA
ASV_2848	3.39385	1.85798	0.591754	3.13979	0.00169071	0.010976	Bacteria	NB1-j	NA	NA	NA	NA	NA
ASV_6441	1.93135	1.89077	0.446966	4.23024	2.33445e-05	0.000209933	Bacteria	NB1-j	NA	NA	NA	NA	NA
ASV_5554	2.17626	1.89885	0.442622	4.29001	1.78662e-05	0.000163248	Bacteria	NB1-j	NA	NA	NA	NA	NA
ASV_1372	7.49446	1.90689	0.453747	4.20254	2.63937e-05	0.00023566	Bacteria	NB1-j	NA	NA	NA	NA	NA
ASV_1257	7.62741	1.90689	0.441058	4.32344	1.53613e-05	0.000141461	Bacteria	NB1-j	NA	NA	NA	NA	NA
ASV_3340	3.16993	1.93074	0.446541	4.32376	1.5339e-05	0.000141325	Bacteria	NB1-j	NA	NA	NA	NA	NA
ASV_5462	2.03631	1.9542	0.481309	4.06017	4.9037e-05	0.000421019	Bacteria	NB1-j	NA	NA	NA	NA	NA
ASV_2608	3.80671	1.96193	0.520038	3.77267	0.000161511	0.00127944	Bacteria	NB1-j	NA	NA	NA	NA	NA
ASV_4675	2.58212	1.97728	0.45253	4.36939	1.24593e-05	0.000115759	Bacteria	NB1-j	NA	NA	NA	NA	NA
ASV_946	8.42514	2	0.591815	3.37944	0.000726348	0.00507957	Bacteria	NB1-j	NA	NA	NA	NA	NA
ASV_1009	9.55876	2.02975	0.455903	4.45215	8.50165e-06	8.13827e-05	Bacteria	NB1-j	NA	NA	NA	NA	NA
ASV_6396	2.0573	2.04439	0.466004	4.38707	1.14888e-05	0.00010738	Bacteria	NB1-j	NA	NA	NA	NA	NA
ASV_1969	4.86335	2.06609	0.52422	3.94126	8.10543e-05	0.000673134	Bacteria	NB1-j	NA	NA	NA	NA	NA
ASV_1835	6.23489	2.07325	0.496201	4.17824	2.93769e-05	0.000260808	Bacteria	NB1-j	NA	NA	NA	NA	NA
ASV_919	11.5741	2.08037	0.521151	3.99188	6.55503e-05	0.000552937	Bacteria	NB1-j	NA	NA	NA	NA	NA
ASV_2161	5.08028	2.08037	0.476162	4.36904	1.24791e-05	0.000115886	Bacteria	NB1-j	NA	NA	NA	NA	NA
ASV_3086	3.87669	2.08746	0.466737	4.47246	7.73259e-06	7.45737e-05	Bacteria	NB1-j	NA	NA	NA	NA	NA
ASV_1631	6.14392	2.10852	0.492128	4.2845	1.83148e-05	0.000167103	Bacteria	NB1-j	NA	NA	NA	NA	NA
ASV_1653	6.26288	2.12928	0.482536	4.41269	1.02093e-05	9.64286e-05	Bacteria	NB1-j	NA	NA	NA	NA	NA
ASV_554	15.4018	2.12928	0.465091	4.5782	4.68989e-06	4.64708e-05	Bacteria	NB1-j	NA	NA	NA	NA	NA
ASV_1793	5.85002	2.1565	0.479105	4.50111	6.75991e-06	6.57673e-05	Bacteria	NB1-j	NA	NA	NA	NA	NA
ASV_2955	3.5338	2.1964	0.457164	4.80439	1.55223e-06	1.63743e-05	Bacteria	NB1-j	NA	NA	NA	NA	NA
ASV_5266	2.29522	2.20294	0.491235	4.4845	7.30866e-06	7.06667e-05	Bacteria	NB1-j	NA	NA	NA	NA	NA
ASV_1633	6.71772	2.26679	0.555032	4.08407	4.42544e-05	0.000382228	Bacteria	NB1-j	NA	NA	NA	NA	NA
ASV_3890	3.00198	2.3159	0.47202	4.90636	9.27803e-07	1.00296e-05	Bacteria	NB1-j	NA	NA	NA	NA	NA
ASV_1614	6.24888	2.3634	0.500905	4.71827	2.37858e-06	2.46346e-05	Bacteria	NB1-j	NA	NA	NA	NA	NA
ASV_571	16.0036	2.40372	0.447622	5.36998	7.87435e-08	9.5453e-07	Bacteria	NB1-j	NA	NA	NA	NA	NA
ASV_4450	2.86903	2.42626	0.458158	5.29569	1.18569e-07	1.41717e-06	Bacteria	NB1-j	NA	NA	NA	NA	NA
ASV_5189	2.49116	2.4374	0.457485	5.32784	9.93901e-08	1.19555e-06	Bacteria	NB1-j	NA	NA	NA	NA	NA
ASV_3363	3.38685	2.49185	0.477107	5.22284	1.762e-07	2.0717e-06	Bacteria	NB1-j	NA	NA	NA	NA	NA
ASV_896	10.7204	2.50779	0.464427	5.39976	6.67311e-08	8.15761e-07	Bacteria	NB1-j	NA	NA	NA	NA	NA
ASV_1893	5.71006	2.53916	0.551133	4.60716	4.08207e-06	4.08359e-05	Bacteria	NB1-j	NA	NA	NA	NA	NA
ASV_978	10.6574	2.61961	0.442894	5.91475	3.32388e-09	4.60269e-08	Bacteria	NB1-j	NA	NA	NA	NA	NA
ASV_2775	3.88368	2.62449	0.527024	4.97983	6.36392e-07	7.00441e-06	Bacteria	NB1-j	NA	NA	NA	NA	NA
ASV_3380	3.13494	2.66296	0.46011	5.78767	7.13681e-09	9.62009e-08	Bacteria	NB1-j	NA	NA	NA	NA	NA
ASV_1680	5.06628	2.6865	0.527387	5.09398	3.50622e-07	3.99492e-06	Bacteria	NB1-j	NA	NA	NA	NA	NA
ASV_2242	4.47148	2.73245	0.539828	5.06171	4.1552e-07	4.69448e-06	Bacteria	NB1-j	NA	NA	NA	NA	NA
ASV_808	12.7987	2.82443	0.499828	5.6508	1.59699e-08	2.0752e-07	Bacteria	NB1-j	NA	NA	NA	NA	NA
ASV_584	12.2528	2.83289	0.471629	6.0066	1.89454e-09	2.68279e-08	Bacteria	NB1-j	NA	NA	NA	NA	NA
ASV_1185	8.2642	2.8413	0.480482	5.91344	3.35033e-09	4.63589e-08	Bacteria	NB1-j	NA	NA	NA	NA	NA
ASV_1453	6.04595	2.87036	0.557159	5.15179	2.58015e-07	2.98138e-06	Bacteria	NB1-j	NA	NA	NA	NA	NA
ASV_1867	5.82902	2.87173	0.467738	6.13962	8.27195e-10	1.20686e-08	Bacteria	NB1-j	NA	NA	NA	NA	NA
ASV_3256	3.69475	2.93467	0.511144	5.74139	9.39049e-09	1.24611e-07	Bacteria	NB1-j	NA	NA	NA	NA	NA
ASV_2207	4.51347	3.01123	0.523218	5.75521	8.65346e-09	1.15813e-07	Bacteria	NB1-j	NA	NA	NA	NA	NA
ASV_345	26.1571	3.18322	0.42894	7.42113	1.16121e-13	2.25715e-12	Bacteria	NB1-j	NA	NA	NA	NA	NA
ASV_1998	6.13692	3.21594	0.557609	5.76736	8.05209e-09	1.0815e-07	Bacteria	NB1-j	NA	NA	NA	NA	NA
ASV_902	9.69871	3.26679	0.464199	7.03748	1.95753e-12	3.46107e-11	Bacteria	NB1-j	NA	NA	NA	NA	NA
ASV_821	9.11091	3.36632	0.603142	5.58131	2.38715e-08	3.03888e-07	Bacteria	NB1-j	NA	NA	NA	NA	NA
ASV_693	15.9196	3.40656	0.456227	7.46681	8.21631e-14	1.6121e-12	Bacteria	NB1-j	NA	NA	NA	NA	NA
ASV_2059	5.45115	3.73019	0.496699	7.50995	5.91522e-14	1.16916e-12	Bacteria	NB1-j	NA	NA	NA	NA	NA
ASV_592	16.6963	3.74819	0.469914	7.97633	1.50744e-15	3.2913e-14	Bacteria	NB1-j	NA	NA	NA	NA	NA
ASV_2056	5.92699	3.81592	0.482054	7.91596	2.45357e-15	5.2894e-14	Bacteria	NB1-j	NA	NA	NA	NA	NA
ASV_1318	8.79602	4.07503	0.528412	7.71184	1.24016e-14	2.55334e-13	Bacteria	NB1-j	NA	NA	NA	NA	NA
ASV_911	12.0289	4.29309	0.576976	7.44067	1.00175e-13	1.95528e-12	Bacteria	NB1-j	NA	NA	NA	NA	NA
ASV_1251	9.39781	4.38658	0.490751	8.93851	3.94467e-19	1.07191e-17	Bacteria	NB1-j	NA	NA	NA	NA	NA
ASV_520	16.4794	4.53786	0.457748	9.91345	3.63873e-23	1.19658e-21	Bacteria	NB1-j	NA	NA	NA	NA	NA
ASV_265	28.6133	5.27146	0.481467	10.9487	6.7373e-28	2.75613e-26	Bacteria	NB1-j	NA	NA	NA	NA	NA
ASV_1334	7.10959	1.666	0.483749	3.44393	0.000573321	0.00410887	Bacteria	Nitrospinota	Nitrospinia	Nitrospinales	Nitrospinaceae	LS-NOB	NA
ASV_1827	5.54212	3.43463	0.566225	6.06584	1.31268e-09	1.8902e-08	Bacteria	Nitrospinota	Nitrospinia	Nitrospinales	Nitrospinaceae	LS-NOB	NA
ASV_1320	7.20756	1.62449	0.492746	3.29681	0.000977881	0.00666244	Bacteria	Nitrospinota	Nitrospinia	Nitrospinales	Nitrospinaceae	NA	NA
ASV_2000	3.8277	2.02237	0.505405	4.00148	6.29478e-05	0.000532659	Bacteria	Nitrospinota	Nitrospinia	Nitrospinales	Nitrospinaceae	NA	NA
ASV_1049	4.29654	2.07325	0.483751	4.28577	1.82104e-05	0.000166231	Bacteria	Nitrospinota	Nitrospinia	Nitrospinales	Nitrospinaceae	NA	NA
ASV_2753	3.58978	2.13614	0.484897	4.40534	1.05616e-05	9.90587e-05	Bacteria	Nitrospinota	Nitrospinia	Nitrospinales	Nitrospinaceae	NA	NA
ASV_957	9.30685	2.31557	0.475254	4.87227	1.10321e-06	1.18034e-05	Bacteria	Nitrospinota	Nitrospinia	Nitrospinales	Nitrospinaceae	NA	NA
ASV_4088	2.83404	2.50779	0.515681	4.86307	1.15577e-06	1.23306e-05	Bacteria	Nitrospinota	Nitrospinia	Nitrospinales	Nitrospinaceae	NA	NA
ASV_3843	3.22591	2.70966	0.516423	5.24698	1.54615e-07	1.83168e-06	Bacteria	Nitrospinota	Nitrospinia	Nitrospinales	Nitrospinaceae	NA	NA
ASV_1211	7.62042	2.714	0.554295	4.89632	9.765e-07	1.05136e-05	Bacteria	Nitrospinota	Nitrospinia	Nitrospinales	Nitrospinaceae	NA	NA
ASV_1591	6.33285	3.14975	0.498984	6.31232	2.74882e-10	4.20656e-09	Bacteria	Nitrospinota	Nitrospinia	Nitrospinales	Nitrospinaceae	NA	NA
ASV_1878	3.8487	1.64386	0.501596	3.27725	0.00104823	0.00711595	Bacteria	Nitrospinota	Nitrospinia	Nitrospinales	Nitrospinaceae	Nitrospina	NA
ASV_3076	3.07896	1.77259	0.505092	3.50944	0.000449056	0.00329115	Bacteria	Nitrospinota	Nitrospinia	Nitrospinales	Nitrospinaceae	Nitrospina	NA
ASV_7136	1.88236	1.84967	0.452395	4.08861	4.33966e-05	0.000375403	Bacteria	Nitrospinota	Nitrospinia	Nitrospinales	Nitrospinaceae	Nitrospina	NA
ASV_3094	3.40784	1.90689	0.52837	3.609	0.000307374	0.00232724	Bacteria	Nitrospinota	Nitrospinia	Nitrospinales	Nitrospinaceae	Nitrospina	NA
ASV_2585	3.93966	1.91488	0.473718	4.04225	5.29417e-05	0.000452269	Bacteria	Nitrospinota	Nitrospinia	Nitrospinales	Nitrospinaceae	Nitrospina	NA
ASV_4358	2.49815	2.08037	0.463331	4.49004	7.12102e-06	6.8959e-05	Bacteria	Nitrospinota	Nitrospinia	Nitrospinales	Nitrospinaceae	Nitrospina	NA
ASV_618	7.85834	2.29155	0.618862	3.70285	0.000213193	0.0016535	Bacteria	Nitrospinota	Nitrospinia	Nitrospinales	Nitrospinaceae	Nitrospina	NA
ASV_3638	3.29588	2.34577	0.506193	4.63415	3.584e-06	3.61035e-05	Bacteria	Nitrospinota	Nitrospinia	Nitrospinales	Nitrospinaceae	Nitrospina	NA
ASV_3889	3.2539	2.44846	0.529257	4.62622	3.72406e-06	3.74278e-05	Bacteria	Nitrospinota	Nitrospinia	Nitrospinales	Nitrospinaceae	Nitrospina	NA
ASV_3899	2.84104	2.47032	0.48739	5.06847	4.01033e-07	4.54997e-06	Bacteria	Nitrospinota	Nitrospinia	Nitrospinales	Nitrospinaceae	Nitrospina	NA
ASV_4251	2.59612	2.51832	0.463157	5.43731	5.40918e-08	6.67773e-07	Bacteria	Nitrospinota	Nitrospinia	Nitrospinales	Nitrospinaceae	Nitrospina	NA
ASV_4564	2.61012	2.52878	0.511578	4.94309	7.68924e-07	8.404e-06	Bacteria	Nitrospinota	Nitrospinia	Nitrospinales	Nitrospinaceae	Nitrospina	NA
ASV_4243	3.01598	2.60979	0.535316	4.87524	1.08676e-06	1.1634e-05	Bacteria	Nitrospinota	Nitrospinia	Nitrospinales	Nitrospinaceae	Nitrospina	NA
ASV_4264	2.77106	2.64386	0.475625	5.55869	2.71803e-08	3.43912e-07	Bacteria	Nitrospinota	Nitrospinia	Nitrospinales	Nitrospinaceae	Nitrospina	NA
ASV_1060	9.32084	2.68182	0.483568	5.54591	2.92435e-08	3.6754e-07	Bacteria	Nitrospinota	Nitrospinia	Nitrospinales	Nitrospinaceae	Nitrospina	NA
ASV_701	13.7853	2.75489	0.552738	4.98408	6.22583e-07	6.8645e-06	Bacteria	Nitrospinota	Nitrospinia	Nitrospinales	Nitrospinaceae	Nitrospina	NA
ASV_3279	3.33087	2.79008	0.448923	6.21505	5.13092e-10	7.61606e-09	Bacteria	Nitrospinota	Nitrospinia	Nitrospinales	Nitrospinaceae	Nitrospina	NA
ASV_1621	5.96898	2.82866	0.484347	5.84016	5.21513e-09	7.10113e-08	Bacteria	Nitrospinota	Nitrospinia	Nitrospinales	Nitrospinaceae	Nitrospina	NA
ASV_1907	4.67442	2.91488	0.524606	5.55633	2.75505e-08	3.47659e-07	Bacteria	Nitrospinota	Nitrospinia	Nitrospinales	Nitrospinaceae	Nitrospina	NA
ASV_3295	3.22591	2.91488	0.468071	6.22743	4.74137e-10	7.06577e-09	Bacteria	Nitrospinota	Nitrospinia	Nitrospinales	Nitrospinaceae	Nitrospina	NA
ASV_3152	3.56879	3.08037	0.492935	6.24904	4.12983e-10	6.20367e-09	Bacteria	Nitrospinota	Nitrospinia	Nitrospinales	Nitrospinaceae	Nitrospina	NA
ASV_2395	4.00264	3.08037	0.437421	7.04212	1.89339e-12	3.36032e-11	Bacteria	Nitrospinota	Nitrospinia	Nitrospinales	Nitrospinaceae	Nitrospina	NA
ASV_1833	3.94666	3.09099	0.56011	5.51854	3.4182e-08	4.2789e-07	Bacteria	Nitrospinota	Nitrospinia	Nitrospinales	Nitrospinaceae	Nitrospina	NA
ASV_3149	3.69475	3.16323	0.499728	6.3299	2.45317e-10	3.77877e-09	Bacteria	Nitrospinota	Nitrospinia	Nitrospinales	Nitrospinaceae	Nitrospina	NA
ASV_567	16.6124	3.16658	0.630745	5.02038	5.15681e-07	5.74997e-06	Bacteria	Nitrospinota	Nitrospinia	Nitrospinales	Nitrospinaceae	Nitrospina	NA
ASV_435	17.816	3.2127	0.502619	6.39191	1.63822e-10	2.54223e-09	Bacteria	Nitrospinota	Nitrospinia	Nitrospinales	Nitrospinaceae	Nitrospina	NA
ASV_2063	4.55546	3.53138	0.489685	7.21154	5.53224e-13	1.02042e-11	Bacteria	Nitrospinota	Nitrospinia	Nitrospinales	Nitrospinaceae	Nitrospina	NA
ASV_1323	7.75337	3.6677	0.510832	7.17987	6.97799e-13	1.2808e-11	Bacteria	Nitrospinota	Nitrospinia	Nitrospinales	Nitrospinaceae	Nitrospina	NA
ASV_882	10.8813	3.93074	0.573043	6.85941	6.9144e-12	1.17815e-10	Bacteria	Nitrospinota	Nitrospinia	Nitrospinales	Nitrospinaceae	Nitrospina	NA
ASV_1074	8.69105	4.11721	0.575167	7.15828	8.16949e-13	1.49075e-11	Bacteria	Nitrospinota	Nitrospinia	Nitrospinales	Nitrospinaceae	Nitrospina	NA
ASV_1105	7.39649	4.30682	0.555727	7.74988	9.1981e-15	1.91903e-13	Bacteria	Nitrospinota	Nitrospinia	Nitrospinales	Nitrospinaceae	Nitrospina	NA
ASV_998	10.7134	4.78681	0.473245	10.1149	4.74661e-24	1.63236e-22	Bacteria	Nitrospinota	Nitrospinia	Nitrospinales	Nitrospinaceae	Nitrospina	NA
ASV_948	11.0073	4.79225	0.540503	8.86627	7.56336e-19	2.02304e-17	Bacteria	Nitrospinota	Nitrospinia	Nitrospinales	Nitrospinaceae	Nitrospina	NA
ASV_570	14.2402	5.00936	0.579103	8.6502	5.14084e-18	1.30799e-16	Bacteria	Nitrospinota	Nitrospinia	Nitrospinales	Nitrospinaceae	Nitrospina	NA
ASV_110	36.8565	5.11547	0.751412	6.80781	9.90943e-12	1.66878e-10	Bacteria	Nitrospinota	Nitrospinia	Nitrospinales	Nitrospinaceae	Nitrospina	NA
ASV_461	24.4217	5.14292	0.59533	8.63876	5.68249e-18	1.44384e-16	Bacteria	Nitrospinota	Nitrospinia	Nitrospinales	Nitrospinaceae	Nitrospina	NA
ASV_438	21.6717	5.40301	0.481472	11.2219	3.18512e-29	1.38123e-27	Bacteria	Nitrospinota	Nitrospinia	Nitrospinales	Nitrospinaceae	Nitrospina	NA
ASV_79	70.907	5.96661	0.463572	12.8709	6.55994e-38	3.96065e-36	Bacteria	Nitrospinota	Nitrospinia	Nitrospinales	Nitrospinaceae	Nitrospina	NA
ASV_250	31.3214	6.20498	0.485202	12.7884	1.90233e-37	1.11975e-35	Bacteria	Nitrospinota	Nitrospinia	Nitrospinales	Nitrospinaceae	Nitrospina	NA
ASV_384	26.1991	6.24278	0.445054	14.027	1.06564e-44	7.72566e-43	Bacteria	Nitrospinota	Nitrospinia	Nitrospinales	Nitrospinaceae	Nitrospina	NA
ASV_80	64.938	6.42404	0.59203	10.8509	1.9754e-27	7.90876e-26	Bacteria	Nitrospinota	Nitrospinia	Nitrospinales	Nitrospinaceae	Nitrospina	NA
ASV_735	11.0003	3.08112	0.431564	7.13942	9.37233e-13	1.70198e-11	Bacteria	Nitrospinota	P9X2b3D02	NA	NA	NA	NA
ASV_2461	5.05229	3.47573	0.521866	6.6602	2.7346e-11	4.47668e-10	Bacteria	Nitrospinota	P9X2b3D02	NA	NA	NA	NA
ASV_627	9.66372	1.96193	0.584045	3.35921	0.000781647	0.00544803	Bacteria	Nitrospirota	Nitrospiria	Nitrospirales	Nitrospiraceae	Nitrospira	NA
ASV_686	12.5188	2.13614	0.534783	3.9944	6.48588e-05	0.000547596	Bacteria	Nitrospirota	Nitrospiria	Nitrospirales	Nitrospiraceae	Nitrospira	NA
ASV_3735	3.40784	3.02606	0.51362	5.89163	3.824e-09	5.25647e-08	Bacteria	Nitrospirota	Nitrospiria	Nitrospirales	Nitrospiraceae	Nitrospira	NA
ASV_3462	3.61777	3.06249	0.553504	5.53293	3.14932e-08	3.95022e-07	Bacteria	Nitrospirota	Nitrospiria	Nitrospirales	Nitrospiraceae	Nitrospira	NA
ASV_1712	7.29153	4.28386	0.552297	7.75644	8.73477e-15	1.8305e-13	Bacteria	Nitrospirota	Nitrospiria	Nitrospirales	Nitrospiraceae	Nitrospira	NA
ASV_1594	7.99129	4.44294	0.571018	7.78074	7.21019e-15	1.51778e-13	Bacteria	Nitrospirota	Nitrospiria	Nitrospirales	Nitrospiraceae	Nitrospira	NA
ASV_1144	10.1256	4.52878	0.663386	6.82676	8.68531e-12	1.46923e-10	Bacteria	Nitrospirota	Nitrospiria	Nitrospirales	Nitrospiraceae	Nitrospira	NA
ASV_1472	8.52311	4.53138	0.557765	8.12418	4.50394e-16	1.0177e-14	Bacteria	Nitrospirota	Nitrospiria	Nitrospirales	Nitrospiraceae	Nitrospira	NA
ASV_181	30.5516	5.11894	0.454984	11.2508	2.2949e-29	9.99798e-28	Bacteria	Nitrospirota	Nitrospiria	Nitrospirales	Nitrospiraceae	Nitrospira	NA
ASV_861	14.5691	5.37068	0.600141	8.94903	3.58605e-19	9.75872e-18	Bacteria	Nitrospirota	Nitrospiria	Nitrospirales	Nitrospiraceae	Nitrospira	NA
ASV_63	69.7803	5.53087	0.400829	13.7986	2.59953e-43	1.82814e-41	Bacteria	Nitrospirota	Nitrospiria	Nitrospirales	Nitrospiraceae	Nitrospira	NA
ASV_555	21.3008	5.94056	0.613295	9.6863	3.44804e-22	1.0737e-20	Bacteria	Nitrospirota	Nitrospiria	Nitrospirales	Nitrospiraceae	Nitrospira	NA
ASV_6517	1.90335	1.66296	0.45098	3.68744	0.000226518	0.00175106	Bacteria	Planctomycetota	BD7-11	NA	NA	NA	NA
ASV_2007	5.0033	1.73383	0.427467	4.05605	4.99103e-05	0.000427149	Bacteria	Planctomycetota	BD7-11	NA	NA	NA	NA
ASV_2739	3.97465	1.89077	0.49333	3.83267	0.000126759	0.00102108	Bacteria	Planctomycetota	BD7-11	NA	NA	NA	NA
ASV_4290	2.61711	2.26053	0.456122	4.95597	7.19714e-07	7.87993e-06	Bacteria	Planctomycetota	BD7-11	NA	NA	NA	NA
ASV_3103	3.5338	1.79874	0.507795	3.54226	0.000396715	0.00293967	Bacteria	Planctomycetota	OM190	NA	NA	NA	NA
ASV_3770	2.29522	1.8413	0.466993	3.94289	8.05059e-05	0.000669468	Bacteria	Planctomycetota	OM190	NA	NA	NA	NA
ASV_2162	4.37352	1.84967	0.575832	3.21216	0.0013174	0.00877195	Bacteria	Planctomycetota	OM190	NA	NA	NA	NA
ASV_4194	2.42118	2.29155	0.496565	4.61481	3.93446e-06	3.94223e-05	Bacteria	Planctomycetota	OM190	NA	NA	NA	NA
ASV_662	13.4075	2.60486	0.536002	4.8598	1.17506e-06	1.25151e-05	Bacteria	Planctomycetota	OM190	NA	NA	NA	NA
ASV_837	12.0779	4.53527	0.509577	8.90008	5.5805e-19	1.50553e-17	Bacteria	Planctomycetota	OM190	NA	NA	NA	NA
ASV_2951	3.66676	1.82443	0.492443	3.70485	0.000211512	0.0016425	Bacteria	Planctomycetota	Phycisphaerae	B103G10	NA	NA	NA
ASV_2575	3.70175	2	0.46741	4.27889	1.87824e-05	0.000171203	Bacteria	Planctomycetota	Phycisphaerae	B103G10	NA	NA	NA
ASV_1840	6.39583	3.16323	0.50605	6.25082	4.08302e-10	6.13826e-09	Bacteria	Planctomycetota	Phycisphaerae	B103G10	NA	NA	NA
ASV_1954	4.49947	1.65344	0.455627	3.62894	0.000284589	0.00217049	Bacteria	Planctomycetota	Phycisphaerae	C86	NA	NA	NA
ASV_1534	5.42316	1.68182	0.426271	3.94543	7.96553e-05	0.000662688	Bacteria	Planctomycetota	Phycisphaerae	C86	NA	NA	NA
ASV_2981	3.07196	1.76377	0.465327	3.79038	0.000150417	0.00119931	Bacteria	Planctomycetota	Phycisphaerae	C86	NA	NA	NA
ASV_2537	3.70175	1.90689	0.486817	3.91706	8.96363e-05	0.00074015	Bacteria	Planctomycetota	Phycisphaerae	C86	NA	NA	NA
ASV_646	11.4411	2.64866	0.516066	5.1324	2.8607e-07	3.2934e-06	Bacteria	Planctomycetota	Phycisphaerae	C86	NA	NA	NA
ASV_1890	5.19224	2.6865	0.520959	5.15684	2.51153e-07	2.90926e-06	Bacteria	Planctomycetota	Phycisphaerae	C86	NA	NA	NA
ASV_849	9.68472	2.98147	0.448699	6.6447	3.03842e-11	4.96108e-10	Bacteria	Planctomycetota	Phycisphaerae	C86	NA	NA	NA
ASV_325	25.4084	4.8371	0.447047	10.8201	2.76405e-27	1.09726e-25	Bacteria	Planctomycetota	Phycisphaerae	C86	NA	NA	NA
ASV_1943	5.19924	2.02237	0.526294	3.84266	0.000121708	0.000985051	Bacteria	Planctomycetota	Phycisphaerae	CCM11a	NA	NA	NA
ASV_2459	4.4295	2.35167	0.505528	4.65191	3.28869e-06	3.33252e-05	Bacteria	Planctomycetota	Phycisphaerae	MSBL9	SG8-4	NA	NA
ASV_3109	3.46383	2.35167	0.526527	4.46639	7.95494e-06	7.66e-05	Bacteria	Planctomycetota	Phycisphaerae	Phycisphaerales	Phycisphaeraceae	AKYG587	NA
ASV_6955	1.70742	1.62449	0.436721	3.71975	0.000199422	0.0015544	Bacteria	Planctomycetota	Phycisphaerae	Phycisphaerales	Phycisphaeraceae	NA	NA
ASV_4791	2.23224	1.64386	0.443375	3.7076	0.000209236	0.00162617	Bacteria	Planctomycetota	Phycisphaerae	Phycisphaerales	Phycisphaeraceae	NA	NA
ASV_7436	1.73541	1.66296	0.421128	3.94883	7.85327e-05	0.000653929	Bacteria	Planctomycetota	Phycisphaerae	Phycisphaerales	Phycisphaeraceae	NA	NA
ASV_6191	1.81938	1.70966	0.475574	3.59494	0.000324471	0.00244584	Bacteria	Planctomycetota	Phycisphaerae	Phycisphaerales	Phycisphaeraceae	NA	NA
ASV_6081	1.86137	1.71882	0.468938	3.66534	0.000247006	0.0018985	Bacteria	Planctomycetota	Phycisphaerae	Phycisphaerales	Phycisphaeraceae	NA	NA
ASV_4408	2.30922	1.93074	0.474571	4.06839	4.73396e-05	0.000407377	Bacteria	Planctomycetota	Phycisphaerae	Phycisphaerales	Phycisphaeraceae	NA	NA
ASV_3871	3.04397	2.00749	0.478919	4.19172	2.76853e-05	0.000246256	Bacteria	Planctomycetota	Phycisphaerae	Phycisphaerales	Phycisphaeraceae	NA	NA
ASV_4614	2.16227	2.04439	0.428341	4.77282	1.81667e-06	1.90143e-05	Bacteria	Planctomycetota	Phycisphaerae	Phycisphaerales	Phycisphaeraceae	NA	NA
ASV_4697	2.43517	2.36923	0.449693	5.26856	1.37498e-07	1.63405e-06	Bacteria	Planctomycetota	Phycisphaerae	Phycisphaerales	Phycisphaeraceae	NA	NA
ASV_4952	2.56113	2.39803	0.463374	5.17515	2.27725e-07	2.64768e-06	Bacteria	Planctomycetota	Phycisphaerae	Phycisphaerales	Phycisphaeraceae	NA	NA
ASV_2128	5.21323	2.89825	0.487409	5.94623	2.7438e-09	3.81915e-08	Bacteria	Planctomycetota	Phycisphaerae	Phycisphaerales	Phycisphaeraceae	NA	NA
ASV_3127	3.63177	3.10503	0.470122	6.60474	3.98214e-11	6.44591e-10	Bacteria	Planctomycetota	Phycisphaerae	Phycisphaerales	Phycisphaeraceae	NA	NA
ASV_2698	3.76472	3.14636	0.442013	7.11824	1.09312e-12	1.97172e-11	Bacteria	Planctomycetota	Phycisphaerae	Phycisphaerales	Phycisphaeraceae	NA	NA
ASV_5436	2.30922	1.92283	0.508526	3.78118	0.000156085	0.00123977	Bacteria	Planctomycetota	Phycisphaerae	Phycisphaerales	Phycisphaeraceae	SM1A02	NA
ASV_1584	2.74307	2.2854	0.499428	4.57604	4.73861e-06	4.69288e-05	Bacteria	Planctomycetota	Phycisphaerae	Phycisphaerales	Phycisphaeraceae	SM1A02	NA
ASV_1842	4.7164	2.38658	0.509221	4.68673	2.77602e-06	2.84683e-05	Bacteria	Planctomycetota	Phycisphaerae	Phycisphaerales	Phycisphaeraceae	SM1A02	NA
ASV_3409	2.74307	2.62449	0.520502	5.04222	4.60152e-07	5.16762e-06	Bacteria	Planctomycetota	Phycisphaerae	Phycisphaerales	Phycisphaeraceae	SM1A02	NA
ASV_1432	3.12794	2.87036	0.562792	5.10022	3.39259e-07	3.87485e-06	Bacteria	Planctomycetota	Phycisphaerae	Phycisphaerales	Phycisphaeraceae	SM1A02	NA
ASV_1383	7.3615	1.67242	0.561043	2.98092	0.00287384	0.017652	Bacteria	Planctomycetota	Phycisphaerae	Phycisphaerales	Phycisphaeraceae	Urania-1B-19_marine_sediment_group	NA
ASV_751	12.9246	1.80735	0.589606	3.06536	0.00217407	0.0137914	Bacteria	Planctomycetota	Phycisphaerae	Phycisphaerales	Phycisphaeraceae	Urania-1B-19_marine_sediment_group	NA
ASV_965	7.48746	2.00749	0.62994	3.1868	0.00143855	0.00950346	Bacteria	Planctomycetota	Phycisphaerae	Phycisphaerales	Phycisphaeraceae	Urania-1B-19_marine_sediment_group	NA
ASV_1017	9.67772	2.08746	0.632649	3.29956	0.000968371	0.00660964	Bacteria	Planctomycetota	Phycisphaerae	Phycisphaerales	Phycisphaeraceae	Urania-1B-19_marine_sediment_group	NA
ASV_3646	2.85503	2.10852	0.524996	4.01626	5.91279e-05	0.000501919	Bacteria	Planctomycetota	Phycisphaerae	Phycisphaerales	Phycisphaeraceae	Urania-1B-19_marine_sediment_group	NA
ASV_741	9.4538	2.21594	0.497847	4.45104	8.54568e-06	8.17403e-05	Bacteria	Planctomycetota	Phycisphaerae	Phycisphaerales	Phycisphaeraceae	Urania-1B-19_marine_sediment_group	NA
ASV_1730	6.15791	2.23522	0.609364	3.66811	0.000244345	0.00188082	Bacteria	Planctomycetota	Phycisphaerae	Phycisphaerales	Phycisphaeraceae	Urania-1B-19_marine_sediment_group	NA
ASV_1222	2.32321	2.25424	0.496679	4.53863	5.66209e-06	5.55181e-05	Bacteria	Planctomycetota	Phycisphaerae	Phycisphaerales	Phycisphaeraceae	Urania-1B-19_marine_sediment_group	NA
ASV_1047	7.14458	2.29155	0.59785	3.83299	0.000126594	0.00102019	Bacteria	Planctomycetota	Phycisphaerae	Phycisphaerales	Phycisphaeraceae	Urania-1B-19_marine_sediment_group	NA
ASV_1828	5.62609	2.30985	0.590924	3.90888	9.2724e-05	0.000763631	Bacteria	Planctomycetota	Phycisphaerae	Phycisphaerales	Phycisphaeraceae	Urania-1B-19_marine_sediment_group	NA
ASV_3752	2.75007	2.33985	0.503128	4.6506	3.30966e-06	3.35197e-05	Bacteria	Planctomycetota	Phycisphaerae	Phycisphaerales	Phycisphaeraceae	Urania-1B-19_marine_sediment_group	NA
ASV_854	10.3145	2.57491	0.628945	4.09401	4.23973e-05	0.000367541	Bacteria	Planctomycetota	Phycisphaerae	Phycisphaerales	Phycisphaeraceae	Urania-1B-19_marine_sediment_group	NA
ASV_1563	6.52179	2.58996	0.673814	3.84373	0.000121177	0.000982019	Bacteria	Planctomycetota	Phycisphaerae	Phycisphaerales	Phycisphaeraceae	Urania-1B-19_marine_sediment_group	NA
ASV_2191	5.09427	2.72792	0.557526	4.8929	9.93602e-07	1.06855e-05	Bacteria	Planctomycetota	Phycisphaerae	Phycisphaerales	Phycisphaeraceae	Urania-1B-19_marine_sediment_group	NA
ASV_5143	2.26023	1.71882	0.489993	3.50784	0.000451755	0.00330835	Bacteria	Planctomycetota	Phycisphaerae	S-70	NA	NA	NA
ASV_6436	2.00132	1.88264	0.493565	3.81438	0.000136528	0.00109414	Bacteria	Planctomycetota	Phycisphaerae	S-70	NA	NA	NA
ASV_5371	2.21125	2.1224	0.496874	4.27149	1.94168e-05	0.000176255	Bacteria	Planctomycetota	Phycisphaerae	S-70	NA	NA	NA
ASV_971	10.8533	2.74147	0.597552	4.58783	4.47878e-06	4.45671e-05	Bacteria	Planctomycetota	Phycisphaerae	S-70	NA	NA	NA
ASV_1236	6.85768	2.01495	0.464436	4.33849	1.43465e-05	0.000132571	Bacteria	Planctomycetota	Pla3_lineage	NA	NA	NA	NA
ASV_950	10.2795	2.32193	0.450661	5.15227	2.57352e-07	2.97555e-06	Bacteria	Planctomycetota	Pla3_lineage	NA	NA	NA	NA
ASV_7486	1.80539	1.68182	0.422465	3.98097	6.86332e-05	0.000576095	Bacteria	Planctomycetota	Pla4_lineage	NA	NA	NA	NA
ASV_3377	2.70808	1.80735	0.45382	3.98254	6.8184e-05	0.000573094	Bacteria	Planctomycetota	Planctomycetes	NA	NA	NA	NA
ASV_6037	2.0783	1.96963	0.455064	4.32824	1.50304e-05	0.000138686	Bacteria	Planctomycetota	Planctomycetes	NA	NA	NA	NA
ASV_7126	1.74941	1.60486	0.45558	3.52268	0.000427212	0.00314949	Bacteria	Planctomycetota	Planctomycetes	Pirellulales	Pirellulaceae	Blastopirellula	NA
ASV_8079	1.70742	1.61471	0.45447	3.55295	0.000380938	0.0028317	Bacteria	Planctomycetota	Planctomycetes	Pirellulales	Pirellulaceae	Blastopirellula	NA
ASV_3809	2.39319	1.64386	0.481281	3.41558	0.000636459	0.00452853	Bacteria	Planctomycetota	Planctomycetes	Pirellulales	Pirellulaceae	Blastopirellula	NA
ASV_4575	2.24624	1.70044	0.461442	3.68505	0.000228657	0.00176614	Bacteria	Planctomycetota	Planctomycetes	Pirellulales	Pirellulaceae	Blastopirellula	NA
ASV_6807	1.81938	1.77259	0.441268	4.01703	5.89352e-05	0.000500509	Bacteria	Planctomycetota	Planctomycetes	Pirellulales	Pirellulaceae	Blastopirellula	NA
ASV_4086	2.78506	2.61961	0.453784	5.77281	7.79593e-09	1.04935e-07	Bacteria	Planctomycetota	Planctomycetes	Pirellulales	Pirellulaceae	Blastopirellula	NA
ASV_2976	3.61777	2.88671	0.464116	6.21981	4.97765e-10	7.40613e-09	Bacteria	Planctomycetota	Planctomycetes	Pirellulales	Pirellulaceae	Blastopirellula	NA
ASV_1116	8.73304	4.44708	0.483875	9.19057	3.90773e-20	1.12023e-18	Bacteria	Planctomycetota	Planctomycetes	Pirellulales	Pirellulaceae	Blastopirellula	NA
ASV_5588	1.89636	1.70044	0.443204	3.8367	0.000124699	0.00100665	Bacteria	Planctomycetota	Planctomycetes	Pirellulales	Pirellulaceae	Bythopirellula	NA
ASV_7483	1.7774	1.71882	0.450269	3.81731	0.000134914	0.0010826	Bacteria	Planctomycetota	Planctomycetes	Pirellulales	Pirellulaceae	Bythopirellula	NA
ASV_6102	2.01532	2	0.451939	4.42537	9.62757e-06	9.13937e-05	Bacteria	Planctomycetota	Planctomycetes	Pirellulales	Pirellulaceae	Bythopirellula	NA
ASV_5464	2.23224	2.1224	0.463141	4.58261	4.59205e-06	4.55494e-05	Bacteria	Planctomycetota	Planctomycetes	Pirellulales	Pirellulaceae	Bythopirellula	NA
ASV_3062	3.72274	3.16323	0.50102	6.31358	2.72655e-10	4.17589e-09	Bacteria	Planctomycetota	Planctomycetes	Pirellulales	Pirellulaceae	Bythopirellula	NA
ASV_3242	3.85569	3.24476	0.506116	6.4111	1.4447e-10	2.25309e-09	Bacteria	Planctomycetota	Planctomycetes	Pirellulales	Pirellulaceae	Bythopirellula	NA
ASV_1502	7.56444	4.31892	0.480165	8.99465	2.36981e-19	6.51508e-18	Bacteria	Planctomycetota	Planctomycetes	Pirellulales	Pirellulaceae	Bythopirellula	NA
ASV_1208	8.96396	4.62571	0.483113	9.57479	1.02067e-21	3.13156e-20	Bacteria	Planctomycetota	Planctomycetes	Pirellulales	Pirellulaceae	Bythopirellula	NA
ASV_6146	2.0503	1.70966	0.470205	3.63598	0.000276924	0.00211546	Bacteria	Planctomycetota	Planctomycetes	Pirellulales	Pirellulaceae	NA	NA
ASV_2683	3.61078	1.71882	0.505603	3.39954	0.000674985	0.00477461	Bacteria	Planctomycetota	Planctomycetes	Pirellulales	Pirellulaceae	NA	NA
ASV_4744	2.41418	1.92283	0.473246	4.06307	4.84314e-05	0.00041639	Bacteria	Planctomycetota	Planctomycetes	Pirellulales	Pirellulaceae	NA	NA
ASV_6082	2.02231	1.96193	0.441223	4.44658	8.72492e-06	8.32458e-05	Bacteria	Planctomycetota	Planctomycetes	Pirellulales	Pirellulaceae	NA	NA
ASV_2386	3.98165	2.07325	0.514132	4.03253	5.51807e-05	0.000470539	Bacteria	Planctomycetota	Planctomycetes	Pirellulales	Pirellulaceae	NA	NA
ASV_3528	2.52614	2.14975	0.495039	4.34258	1.40817e-05	0.000130316	Bacteria	Planctomycetota	Planctomycetes	Pirellulales	Pirellulaceae	NA	NA
ASV_2150	4.78638	2.25424	0.506681	4.44903	8.62573e-06	8.24251e-05	Bacteria	Planctomycetota	Planctomycetes	Pirellulales	Pirellulaceae	NA	NA
ASV_5499	2.32321	2.26679	0.485208	4.67178	2.986e-06	3.04553e-05	Bacteria	Planctomycetota	Planctomycetes	Pirellulales	Pirellulaceae	NA	NA
ASV_2541	4.33853	2.36923	0.482788	4.9074	9.22937e-07	9.98271e-06	Bacteria	Planctomycetota	Planctomycetes	Pirellulales	Pirellulaceae	NA	NA
ASV_4587	2.62411	2.53916	0.442255	5.74139	9.39045e-09	1.24611e-07	Bacteria	Planctomycetota	Planctomycetes	Pirellulales	Pirellulaceae	NA	NA
ASV_2749	3.69475	2.8371	0.427228	6.64072	3.12147e-11	5.08784e-10	Bacteria	Planctomycetota	Planctomycetes	Pirellulales	Pirellulaceae	NA	NA
ASV_1658	6.11593	2.85798	0.46487	6.14792	7.85071e-10	1.14629e-08	Bacteria	Planctomycetota	Planctomycetes	Pirellulales	Pirellulaceae	NA	NA
ASV_2660	4.19158	3.3339	0.449953	7.40945	1.26828e-13	2.46272e-12	Bacteria	Planctomycetota	Planctomycetes	Pirellulales	Pirellulaceae	NA	NA
ASV_2174	5.5911	3.87036	0.491785	7.87004	3.5453e-15	7.59932e-14	Bacteria	Planctomycetota	Planctomycetes	Pirellulales	Pirellulaceae	NA	NA
ASV_1725	7.13758	4.04985	0.527926	7.67123	1.70349e-14	3.47679e-13	Bacteria	Planctomycetota	Planctomycetes	Pirellulales	Pirellulaceae	NA	NA
ASV_1029	10.9653	4.84549	0.476269	10.1739	2.59432e-24	9.10532e-23	Bacteria	Planctomycetota	Planctomycetes	Pirellulales	Pirellulaceae	NA	NA
ASV_387	23.9879	5.63882	0.4714	11.9619	5.62918e-33	2.88009e-31	Bacteria	Planctomycetota	Planctomycetes	Pirellulales	Pirellulaceae	NA	NA
ASV_202	36.5556	6.37974	0.391858	16.2807	1.3523e-59	1.45098e-57	Bacteria	Planctomycetota	Planctomycetes	Pirellulales	Pirellulaceae	NA	NA
ASV_4407	1.7634	1.60486	0.455517	3.52317	0.000426423	0.00314491	Bacteria	Planctomycetota	Planctomycetes	Pirellulales	Pirellulaceae	Pir4_lineage	NA
ASV_4043	2.57513	1.61471	0.460407	3.50714	0.000452953	0.00331325	Bacteria	Planctomycetota	Planctomycetes	Pirellulales	Pirellulaceae	Pir4_lineage	NA
ASV_4085	2.17626	1.64386	0.448155	3.66805	0.000244405	0.00188082	Bacteria	Planctomycetota	Planctomycetes	Pirellulales	Pirellulaceae	Pir4_lineage	NA
ASV_3453	3.07896	1.64386	0.457197	3.59551	0.000323754	0.0024424	Bacteria	Planctomycetota	Planctomycetes	Pirellulales	Pirellulaceae	Pir4_lineage	NA
ASV_4734	2.48416	1.69116	0.474462	3.56438	0.000364719	0.00271759	Bacteria	Planctomycetota	Planctomycetes	Pirellulales	Pirellulaceae	Pir4_lineage	NA
ASV_1366	5.95498	1.73697	0.524247	3.31326	0.000922165	0.00632183	Bacteria	Planctomycetota	Planctomycetes	Pirellulales	Pirellulaceae	Pir4_lineage	NA
ASV_4857	2.18326	1.758	0.410894	4.27848	1.88178e-05	0.000171442	Bacteria	Planctomycetota	Planctomycetes	Pirellulales	Pirellulaceae	Pir4_lineage	NA
ASV_6641	1.88236	1.76377	0.471422	3.74137	0.000183019	0.00143668	Bacteria	Planctomycetota	Planctomycetes	Pirellulales	Pirellulaceae	Pir4_lineage	NA
ASV_3777	3.01598	1.82443	0.449576	4.0581	4.94726e-05	0.00042379	Bacteria	Planctomycetota	Planctomycetes	Pirellulales	Pirellulaceae	Pir4_lineage	NA
ASV_4034	2.47716	1.84967	0.46304	3.99461	6.47997e-05	0.00054759	Bacteria	Planctomycetota	Planctomycetes	Pirellulales	Pirellulaceae	Pir4_lineage	NA
ASV_2523	3.30988	1.90689	0.448381	4.25284	2.1108e-05	0.000190734	Bacteria	Planctomycetota	Planctomycetes	Pirellulales	Pirellulaceae	Pir4_lineage	NA
ASV_1235	5.62609	1.91488	0.574337	3.33408	0.000855836	0.00592553	Bacteria	Planctomycetota	Planctomycetes	Pirellulales	Pirellulaceae	Pir4_lineage	NA
ASV_4819	2.28123	1.92283	0.440055	4.36952	1.24518e-05	0.000115747	Bacteria	Planctomycetota	Planctomycetes	Pirellulales	Pirellulaceae	Pir4_lineage	NA
ASV_5616	2.09229	1.9386	0.445379	4.3527	1.34472e-05	0.000124568	Bacteria	Planctomycetota	Planctomycetes	Pirellulales	Pirellulaceae	Pir4_lineage	NA
ASV_2811	3.15593	1.9542	0.472828	4.133	3.5806e-05	0.000313879	Bacteria	Planctomycetota	Planctomycetes	Pirellulales	Pirellulaceae	Pir4_lineage	NA
ASV_4383	2.46317	1.96963	0.448741	4.38922	1.13756e-05	0.000106375	Bacteria	Planctomycetota	Planctomycetes	Pirellulales	Pirellulaceae	Pir4_lineage	NA
ASV_4456	2.3582	1.97728	0.448275	4.41086	1.02961e-05	9.71024e-05	Bacteria	Planctomycetota	Planctomycetes	Pirellulales	Pirellulaceae	Pir4_lineage	NA
ASV_3690	2.88302	1.98363	0.433129	4.57976	4.65502e-06	4.61496e-05	Bacteria	Planctomycetota	Planctomycetes	Pirellulales	Pirellulaceae	Pir4_lineage	NA
ASV_4698	2.51215	1.98489	0.508556	3.903	9.50075e-05	0.000780734	Bacteria	Planctomycetota	Planctomycetes	Pirellulales	Pirellulaceae	Pir4_lineage	NA
ASV_6266	2.00832	1.98489	0.432704	4.58718	4.49264e-06	4.46576e-05	Bacteria	Planctomycetota	Planctomycetes	Pirellulales	Pirellulaceae	Pir4_lineage	NA
ASV_5997	2.10629	1.98489	0.426351	4.65554	3.2313e-06	3.27615e-05	Bacteria	Planctomycetota	Planctomycetes	Pirellulales	Pirellulaceae	Pir4_lineage	NA
ASV_4320	2.54014	2.02975	0.451176	4.49879	6.8341e-06	6.63858e-05	Bacteria	Planctomycetota	Planctomycetes	Pirellulales	Pirellulaceae	Pir4_lineage	NA
ASV_5333	2.20425	2.08746	0.482326	4.32791	1.50533e-05	0.000138761	Bacteria	Planctomycetota	Planctomycetes	Pirellulales	Pirellulaceae	Pir4_lineage	NA
ASV_4853	2.12028	2.08746	0.451878	4.61953	3.84617e-06	3.85788e-05	Bacteria	Planctomycetota	Planctomycetes	Pirellulales	Pirellulaceae	Pir4_lineage	NA
ASV_4087	2.86903	2.08746	0.471274	4.4294	9.4496e-06	8.98861e-05	Bacteria	Planctomycetota	Planctomycetes	Pirellulales	Pirellulaceae	Pir4_lineage	NA
ASV_3897	2.72208	2.10154	0.455913	4.60951	4.03618e-06	4.042e-05	Bacteria	Planctomycetota	Planctomycetes	Pirellulales	Pirellulaceae	Pir4_lineage	NA
ASV_3092	3.15593	2.14975	0.421847	5.09604	3.46836e-07	3.95658e-06	Bacteria	Planctomycetota	Planctomycetes	Pirellulales	Pirellulaceae	Pir4_lineage	NA
ASV_3250	2.98099	2.16992	0.467634	4.64022	3.48032e-06	3.51722e-05	Bacteria	Planctomycetota	Planctomycetes	Pirellulales	Pirellulaceae	Pir4_lineage	NA
ASV_2512	3.51281	2.30494	0.439552	5.24384	1.57266e-07	1.86073e-06	Bacteria	Planctomycetota	Planctomycetes	Pirellulales	Pirellulaceae	Pir4_lineage	NA
ASV_3695	2.85503	2.32193	0.456483	5.08656	3.64613e-07	4.1493e-06	Bacteria	Planctomycetota	Planctomycetes	Pirellulales	Pirellulaceae	Pir4_lineage	NA
ASV_4774	2.57513	2.34577	0.455189	5.15341	2.5579e-07	2.96114e-06	Bacteria	Planctomycetota	Planctomycetes	Pirellulales	Pirellulaceae	Pir4_lineage	NA
ASV_1989	5.25522	2.36048	0.450594	5.23859	1.61806e-07	1.91084e-06	Bacteria	Planctomycetota	Planctomycetes	Pirellulales	Pirellulaceae	Pir4_lineage	NA
ASV_3941	2.68709	2.39232	0.502163	4.76403	1.89765e-06	1.98177e-05	Bacteria	Planctomycetota	Planctomycetes	Pirellulales	Pirellulaceae	Pir4_lineage	NA
ASV_3826	2.89702	2.40372	0.449925	5.3425	9.1675e-08	1.10629e-06	Bacteria	Planctomycetota	Planctomycetes	Pirellulales	Pirellulaceae	Pir4_lineage	NA
ASV_4322	2.6451	2.41504	0.465337	5.18987	2.10442e-07	2.45739e-06	Bacteria	Planctomycetota	Planctomycetes	Pirellulales	Pirellulaceae	Pir4_lineage	NA
ASV_4309	2.77106	2.42066	0.45771	5.28864	1.23229e-07	1.46819e-06	Bacteria	Planctomycetota	Planctomycetes	Pirellulales	Pirellulaceae	Pir4_lineage	NA
ASV_2965	3.8207	2.4374	0.531443	4.58639	4.50972e-06	4.48037e-05	Bacteria	Planctomycetota	Planctomycetes	Pirellulales	Pirellulaceae	Pir4_lineage	NA
ASV_2939	3.75773	2.49185	0.500133	4.98238	6.28076e-07	6.91694e-06	Bacteria	Planctomycetota	Planctomycetes	Pirellulales	Pirellulaceae	Pir4_lineage	NA
ASV_4712	2.57513	2.5025	0.482712	5.18425	2.16882e-07	2.52474e-06	Bacteria	Planctomycetota	Planctomycetes	Pirellulales	Pirellulaceae	Pir4_lineage	NA
ASV_3421	2.93201	2.51832	0.506487	4.97214	6.62172e-07	7.27537e-06	Bacteria	Planctomycetota	Planctomycetes	Pirellulales	Pirellulaceae	Pir4_lineage	NA
ASV_2589	4.07262	2.51832	0.497541	5.06154	4.15874e-07	4.69564e-06	Bacteria	Planctomycetota	Planctomycetes	Pirellulales	Pirellulaceae	Pir4_lineage	NA
ASV_3805	2.63811	2.54946	0.490404	5.1987	2.00685e-07	2.35075e-06	Bacteria	Planctomycetota	Planctomycetes	Pirellulales	Pirellulaceae	Pir4_lineage	NA
ASV_1274	5.21323	2.59991	0.464737	5.59437	2.21419e-08	2.82636e-07	Bacteria	Planctomycetota	Planctomycetes	Pirellulales	Pirellulaceae	Pir4_lineage	NA
ASV_4162	2.91801	2.64866	0.488844	5.41821	6.02002e-08	7.39293e-07	Bacteria	Planctomycetota	Planctomycetes	Pirellulales	Pirellulaceae	Pir4_lineage	NA
ASV_3240	3.20491	2.65821	0.497831	5.33959	9.31593e-08	1.12275e-06	Bacteria	Planctomycetota	Planctomycetes	Pirellulales	Pirellulaceae	Pir4_lineage	NA
ASV_4230	3.02298	2.78572	0.484737	5.74688	9.09038e-09	1.20971e-07	Bacteria	Planctomycetota	Planctomycetes	Pirellulales	Pirellulaceae	Pir4_lineage	NA
ASV_3143	3.31688	2.94642	0.464622	6.34153	2.27489e-10	3.5128e-09	Bacteria	Planctomycetota	Planctomycetes	Pirellulales	Pirellulaceae	Pir4_lineage	NA
ASV_2933	3.85569	3.00375	0.420227	7.14793	8.80952e-13	1.60598e-11	Bacteria	Planctomycetota	Planctomycetes	Pirellulales	Pirellulaceae	Pir4_lineage	NA
ASV_1303	6.87867	3.01495	0.457976	6.5832	4.60436e-11	7.37051e-10	Bacteria	Planctomycetota	Planctomycetes	Pirellulales	Pirellulaceae	Pir4_lineage	NA
ASV_3666	3.41484	3.02975	0.497489	6.09008	1.12856e-09	1.63511e-08	Bacteria	Planctomycetota	Planctomycetes	Pirellulales	Pirellulaceae	Pir4_lineage	NA
ASV_3274	3.56179	3.10154	0.470239	6.59567	4.23349e-11	6.81752e-10	Bacteria	Planctomycetota	Planctomycetes	Pirellulales	Pirellulaceae	Pir4_lineage	NA
ASV_1032	9.01994	3.13416	0.428368	7.3165	2.54531e-13	4.86198e-12	Bacteria	Planctomycetota	Planctomycetes	Pirellulales	Pirellulaceae	Pir4_lineage	NA
ASV_2814	3.92567	3.20945	0.462087	6.94556	3.7697e-12	6.53589e-11	Bacteria	Planctomycetota	Planctomycetes	Pirellulales	Pirellulaceae	Pir4_lineage	NA
ASV_2771	4.15659	3.29155	0.464759	7.08227	1.41809e-12	2.52872e-11	Bacteria	Planctomycetota	Planctomycetes	Pirellulales	Pirellulaceae	Pir4_lineage	NA
ASV_3056	4.10061	3.34873	0.482032	6.9471	3.72859e-12	6.47058e-11	Bacteria	Planctomycetota	Planctomycetes	Pirellulales	Pirellulaceae	Pir4_lineage	NA
ASV_2469	4.54146	3.43463	0.470993	7.29231	3.04674e-13	5.77282e-12	Bacteria	Planctomycetota	Planctomycetes	Pirellulales	Pirellulaceae	Pir4_lineage	NA
ASV_2380	4.66742	3.43463	0.434497	7.90483	2.68292e-15	5.76398e-14	Bacteria	Planctomycetota	Planctomycetes	Pirellulales	Pirellulaceae	Pir4_lineage	NA
ASV_1589	6.58477	3.55969	0.481884	7.38704	1.5013e-13	2.90619e-12	Bacteria	Planctomycetota	Planctomycetes	Pirellulales	Pirellulaceae	Pir4_lineage	NA
ASV_1499	6.22089	3.69349	0.509316	7.25185	4.11117e-13	7.70414e-12	Bacteria	Planctomycetota	Planctomycetes	Pirellulales	Pirellulaceae	Pir4_lineage	NA
ASV_1939	5.76605	3.81164	0.456342	8.35259	6.67824e-17	1.5833e-15	Bacteria	Planctomycetota	Planctomycetes	Pirellulales	Pirellulaceae	Pir4_lineage	NA
ASV_1983	6.12992	3.85175	0.478291	8.05314	8.0695e-16	1.78891e-14	Bacteria	Planctomycetota	Planctomycetes	Pirellulales	Pirellulaceae	Pir4_lineage	NA
ASV_1881	5.6051	3.87242	0.47875	8.0886	6.03537e-16	1.34912e-14	Bacteria	Planctomycetota	Planctomycetes	Pirellulales	Pirellulaceae	Pir4_lineage	NA
ASV_1002	10.0276	4.13271	0.484536	8.52921	1.47349e-17	3.6453e-16	Bacteria	Planctomycetota	Planctomycetes	Pirellulales	Pirellulaceae	Pir4_lineage	NA
ASV_1528	7.39649	4.32343	0.489836	8.82628	1.08219e-18	2.84597e-17	Bacteria	Planctomycetota	Planctomycetes	Pirellulales	Pirellulaceae	Pir4_lineage	NA
ASV_69	70.4941	6.26327	0.408663	15.3263	5.10611e-53	4.65425e-51	Bacteria	Planctomycetota	Planctomycetes	Pirellulales	Pirellulaceae	Pir4_lineage	NA
ASV_2368	2.83404	1.65344	0.46307	3.57061	0.000356156	0.00266118	Bacteria	Planctomycetota	Planctomycetes	Pirellulales	Pirellulaceae	Rhodopirellula	NA
ASV_5944	2.0643	1.98489	0.437042	4.54166	5.58141e-06	5.47555e-05	Bacteria	Planctomycetota	Planctomycetes	Pirellulales	Pirellulaceae	Rhodopirellula	NA
ASV_4495	2.58212	2.49719	0.476337	5.24248	1.58431e-07	1.87216e-06	Bacteria	Planctomycetota	Planctomycetes	Pirellulales	Pirellulaceae	Rhodopirellula	NA
ASV_4892	2.58912	2.51307	0.513322	4.89569	9.796e-07	1.05409e-05	Bacteria	Planctomycetota	Planctomycetes	Pirellulales	Pirellulaceae	Rhodopirellula	NA
ASV_1019	9.84566	3.65332	0.401424	9.1009	8.95896e-20	2.52586e-18	Bacteria	Planctomycetota	Planctomycetes	Pirellulales	Pirellulaceae	Rhodopirellula	NA
ASV_1055	8.87299	3.91635	0.467522	8.37683	5.43711e-17	1.3072e-15	Bacteria	Planctomycetota	Planctomycetes	Pirellulales	Pirellulaceae	Rhodopirellula	NA
ASV_537	15.4858	4.50515	0.441738	10.1987	2.00943e-24	7.11908e-23	Bacteria	Planctomycetota	Planctomycetes	Pirellulales	Pirellulaceae	Rhodopirellula	NA
ASV_4215	1.79839	1.74595	0.487466	3.58169	0.000341373	0.00256091	Bacteria	Planctomycetota	Planctomycetes	Planctomycetales	Gimesiaceae	NA	NA
ASV_3236	3.07896	1.74595	0.491425	3.55284	0.000381101	0.00283179	Bacteria	Planctomycetota	Planctomycetes	Planctomycetales	Gimesiaceae	NA	NA
ASV_5429	2.16227	1.79008	0.457514	3.91262	9.13006e-05	0.0007529	Bacteria	Planctomycetota	Planctomycetes	Planctomycetales	Gimesiaceae	NA	NA
ASV_2516	4.06562	1.8619	0.45867	4.05935	4.92093e-05	0.000422112	Bacteria	Planctomycetota	Planctomycetes	Planctomycetales	Gimesiaceae	NA	NA
ASV_2513	3.75773	1.96963	0.505333	3.89768	9.71199e-05	0.000796341	Bacteria	Planctomycetota	Planctomycetes	Planctomycetales	Gimesiaceae	NA	NA
ASV_1929	4.84236	2.05889	0.465057	4.42719	9.54695e-06	9.07202e-05	Bacteria	Planctomycetota	Planctomycetes	Planctomycetales	Gimesiaceae	NA	NA
ASV_5321	2.26023	2.08037	0.457061	4.55163	5.32307e-06	5.23854e-05	Bacteria	Planctomycetota	Planctomycetes	Planctomycetales	Gimesiaceae	NA	NA
ASV_1524	6.40283	2.54432	0.481168	5.2878	1.23799e-07	1.47328e-06	Bacteria	Planctomycetota	Planctomycetes	Planctomycetales	Gimesiaceae	NA	NA
ASV_2745	3.95366	2.6545	0.506756	5.23823	1.62127e-07	1.91281e-06	Bacteria	Planctomycetota	Planctomycetes	Planctomycetales	Gimesiaceae	NA	NA
ASV_4202	2.31621	1.59495	0.440761	3.61862	0.000296178	0.00224973	Bacteria	Planctomycetota	Planctomycetes	Planctomycetales	NA	NA	NA
ASV_7989	1.72142	1.64386	0.472411	3.47971	0.000501952	0.00363765	Bacteria	Planctomycetota	Planctomycetes	Planctomycetales	NA	NA	NA
ASV_2210	4.52747	1.80735	0.505913	3.57246	0.000353644	0.00264451	Bacteria	Planctomycetota	Planctomycetes	Planctomycetales	NA	NA	NA
ASV_3851	3.00198	1.83289	0.513451	3.56975	0.000357327	0.00266781	Bacteria	Planctomycetota	Planctomycetes	Planctomycetales	NA	NA	NA
ASV_2639	3.93267	1.86625	0.499159	3.73878	0.000184913	0.00144913	Bacteria	Planctomycetota	Planctomycetes	Planctomycetales	NA	NA	NA
ASV_3898	2.946	1.92283	0.473952	4.05702	4.97027e-05	0.000425567	Bacteria	Planctomycetota	Planctomycetes	Planctomycetales	NA	NA	NA
ASV_4953	2.45617	1.92283	0.457441	4.20345	2.62877e-05	0.000234826	Bacteria	Planctomycetota	Planctomycetes	Planctomycetales	NA	NA	NA
ASV_1735	4.00264	2.07325	0.484605	4.27823	1.88387e-05	0.000171549	Bacteria	Planctomycetota	Planctomycetes	Planctomycetales	NA	NA	NA
ASV_1952	4.52047	2.13614	0.49449	4.31988	1.56113e-05	0.000143693	Bacteria	Planctomycetota	Planctomycetes	Planctomycetales	NA	NA	NA
ASV_1451	6.34685	2.63904	0.526453	5.01286	5.36264e-07	5.96883e-06	Bacteria	Planctomycetota	Planctomycetes	Planctomycetales	NA	NA	NA
ASV_6993	1.81239	1.76377	0.466385	3.78178	0.000155712	0.00123785	Bacteria	Planctomycetota	Planctomycetes	Planctomycetales	Rubinisphaeraceae	Planctomicrobium	NA
ASV_7088	1.84737	1.79874	0.444681	4.04502	5.23195e-05	0.00044736	Bacteria	Planctomycetota	Planctomycetes	Planctomycetales	Rubinisphaeraceae	Planctomicrobium	NA
ASV_3307	3.46383	2.16323	0.513246	4.2148	2.5e-05	0.000223962	Bacteria	Planctomycetota	vadinHA49	NA	NA	NA	NA
ASV_666	13.1136	2.75043	0.436669	6.29866	3.00231e-10	4.56472e-09	Bacteria	Planctomycetota	vadinHA49	NA	NA	NA	NA
ASV_7169	1.87536	1.8413	0.447772	4.11214	3.92008e-05	0.000341407	Bacteria	Proteobacteria	Alphaproteobacteria	AT-s3-44	NA	NA	NA
ASV_5200	2.28123	1.94642	0.478081	4.07131	4.67487e-05	0.000402661	Bacteria	Proteobacteria	Alphaproteobacteria	AT-s3-44	NA	NA	NA
ASV_3255	2.77806	2.08746	0.524291	3.98149	6.84834e-05	0.000575095	Bacteria	Proteobacteria	Alphaproteobacteria	AT-s3-44	NA	NA	NA
ASV_716	11.6441	2.59991	0.411972	6.3109	2.7742e-10	4.24195e-09	Bacteria	Proteobacteria	Alphaproteobacteria	AT-s3-44	NA	NA	NA
ASV_796	10.8183	3.94837	0.533803	7.39667	1.39639e-13	2.70588e-12	Bacteria	Proteobacteria	Alphaproteobacteria	AT-s3-44	NA	NA	NA
ASV_1258	9.11791	3.98109	0.483513	8.23367	1.81563e-16	4.19336e-15	Bacteria	Proteobacteria	Alphaproteobacteria	AT-s3-44	NA	NA	NA
ASV_7489	1.81239	1.76377	0.462897	3.81027	0.000138813	0.00111056	Bacteria	Proteobacteria	Alphaproteobacteria	Caulobacterales	Hyphomonadaceae	Robiginitomaculum	NA
ASV_3172	3.8487	3.2384	0.525095	6.16728	6.94765e-10	1.01919e-08	Bacteria	Proteobacteria	Alphaproteobacteria	Caulobacterales	Hyphomonadaceae	Robiginitomaculum	NA
ASV_1503	8.03328	4.45258	0.548463	8.1183	4.72768e-16	1.06569e-14	Bacteria	Proteobacteria	Alphaproteobacteria	Caulobacterales	Hyphomonadaceae	Robiginitomaculum	NA
ASV_6273	1.91035	1.60486	0.454562	3.53056	0.000414674	0.00306187	Bacteria	Proteobacteria	Alphaproteobacteria	Caulobacterales	Parvularculaceae	Marinicaulis	NA
ASV_6813	1.91735	1.89077	0.488552	3.87016	0.000108766	0.000887185	Bacteria	Proteobacteria	Alphaproteobacteria	Caulobacterales	Parvularculaceae	Marinicaulis	NA
ASV_6422	2.0573	1.97728	0.462456	4.27561	1.90615e-05	0.000173326	Bacteria	Proteobacteria	Alphaproteobacteria	Caulobacterales	Parvularculaceae	Marinicaulis	NA
ASV_4348	2.56113	2.23522	0.464452	4.81259	1.48987e-06	1.57688e-05	Bacteria	Proteobacteria	Alphaproteobacteria	Caulobacterales	Parvularculaceae	Marinicaulis	NA
ASV_4409	2.80605	2.57491	0.479903	5.36548	8.07349e-08	9.78039e-07	Bacteria	Proteobacteria	Alphaproteobacteria	Caulobacterales	Parvularculaceae	Marinicaulis	NA
ASV_1526	4.70241	1.64386	0.505769	3.25021	0.00115318	0.0077444	Bacteria	Proteobacteria	Alphaproteobacteria	Defluviicoccales	NA	NA	NA
ASV_1467	6.32586	1.65344	0.535261	3.08904	0.00200805	0.0128074	Bacteria	Proteobacteria	Alphaproteobacteria	Defluviicoccales	NA	NA	NA
ASV_1033	9.53077	1.65344	0.542929	3.04541	0.00232362	0.0146658	Bacteria	Proteobacteria	Alphaproteobacteria	Defluviicoccales	NA	NA	NA
ASV_2998	2.70108	1.70966	0.46786	3.65421	0.000257975	0.00197957	Bacteria	Proteobacteria	Alphaproteobacteria	Defluviicoccales	NA	NA	NA
ASV_2363	3.96766	1.72792	0.584497	2.95625	0.00311403	0.0190339	Bacteria	Proteobacteria	Alphaproteobacteria	Defluviicoccales	NA	NA	NA
ASV_1994	4.45749	1.80147	0.565105	3.18784	0.00143337	0.00947359	Bacteria	Proteobacteria	Alphaproteobacteria	Defluviicoccales	NA	NA	NA
ASV_3032	3.30288	1.96193	0.579391	3.3862	0.000708688	0.00496902	Bacteria	Proteobacteria	Alphaproteobacteria	Defluviicoccales	NA	NA	NA
ASV_708	8.2712	1.96963	0.540288	3.64551	0.000266859	0.00204272	Bacteria	Proteobacteria	Alphaproteobacteria	Defluviicoccales	NA	NA	NA
ASV_2837	4.44349	2.00749	0.564385	3.55696	0.000375177	0.00279219	Bacteria	Proteobacteria	Alphaproteobacteria	Defluviicoccales	NA	NA	NA
ASV_3154	3.98865	2.02975	0.545974	3.71766	0.000201075	0.00156534	Bacteria	Proteobacteria	Alphaproteobacteria	Defluviicoccales	NA	NA	NA
ASV_2971	3.10695	2.08037	0.558	3.72827	0.000192799	0.00150564	Bacteria	Proteobacteria	Alphaproteobacteria	Defluviicoccales	NA	NA	NA
ASV_5302	2.44217	2.14057	0.444815	4.81228	1.49218e-06	1.57763e-05	Bacteria	Proteobacteria	Alphaproteobacteria	Defluviicoccales	NA	NA	NA
ASV_2625	2.99498	2.14296	0.514747	4.16313	3.13917e-05	0.000276993	Bacteria	Proteobacteria	Alphaproteobacteria	Defluviicoccales	NA	NA	NA
ASV_3282	3.51981	2.20294	0.466848	4.71876	2.37292e-06	2.45896e-05	Bacteria	Proteobacteria	Alphaproteobacteria	Defluviicoccales	NA	NA	NA
ASV_5322	2.43517	2.21457	0.468948	4.72243	2.33049e-06	2.41765e-05	Bacteria	Proteobacteria	Alphaproteobacteria	Defluviicoccales	NA	NA	NA
ASV_4371	2.78506	2.21594	0.453901	4.88198	1.05025e-06	1.12753e-05	Bacteria	Proteobacteria	Alphaproteobacteria	Defluviicoccales	NA	NA	NA
ASV_907	8.30618	2.23947	0.56424	3.96899	7.21767e-05	0.000604219	Bacteria	Proteobacteria	Alphaproteobacteria	Defluviicoccales	NA	NA	NA
ASV_2123	4.66742	2.30378	0.608068	3.78869	0.000151445	0.00120597	Bacteria	Proteobacteria	Alphaproteobacteria	Defluviicoccales	NA	NA	NA
ASV_1536	5.22723	2.33985	0.595124	3.9317	8.43477e-05	0.000698015	Bacteria	Proteobacteria	Alphaproteobacteria	Defluviicoccales	NA	NA	NA
ASV_1679	5.83602	2.34577	0.622561	3.76794	0.000164597	0.00130132	Bacteria	Proteobacteria	Alphaproteobacteria	Defluviicoccales	NA	NA	NA
ASV_1683	4.7164	2.3634	0.590723	4.00086	6.31117e-05	0.000533805	Bacteria	Proteobacteria	Alphaproteobacteria	Defluviicoccales	NA	NA	NA
ASV_540	14.695	2.36923	0.520857	4.54872	5.39722e-06	5.30595e-05	Bacteria	Proteobacteria	Alphaproteobacteria	Defluviicoccales	NA	NA	NA
ASV_3059	2.60312	2.39232	0.508641	4.70335	2.55923e-06	2.63746e-05	Bacteria	Proteobacteria	Alphaproteobacteria	Defluviicoccales	NA	NA	NA
ASV_4397	2.85503	2.40939	0.475776	5.06413	4.1027e-07	4.63795e-06	Bacteria	Proteobacteria	Alphaproteobacteria	Defluviicoccales	NA	NA	NA
ASV_1776	5.72406	2.54432	0.564356	4.50836	6.53315e-06	6.36932e-05	Bacteria	Proteobacteria	Alphaproteobacteria	Defluviicoccales	NA	NA	NA
ASV_3351	2.96	2.62449	0.488618	5.37125	7.81938e-08	9.48479e-07	Bacteria	Proteobacteria	Alphaproteobacteria	Defluviicoccales	NA	NA	NA
ASV_1337	7.3825	2.80735	0.601976	4.66357	3.10774e-06	3.1594e-05	Bacteria	Proteobacteria	Alphaproteobacteria	Defluviicoccales	NA	NA	NA
ASV_1330	6.53578	2.82018	0.523439	5.38779	7.13295e-08	8.70276e-07	Bacteria	Proteobacteria	Alphaproteobacteria	Defluviicoccales	NA	NA	NA
ASV_2595	3.89068	2.87447	0.493694	5.82237	5.80203e-09	7.8547e-08	Bacteria	Proteobacteria	Alphaproteobacteria	Defluviicoccales	NA	NA	NA
ASV_1108	8.62108	2.89482	0.503352	5.75108	8.86729e-09	1.18422e-07	Bacteria	Proteobacteria	Alphaproteobacteria	Defluviicoccales	NA	NA	NA
ASV_993	9.99961	3.18982	0.567682	5.61903	1.92034e-08	2.46835e-07	Bacteria	Proteobacteria	Alphaproteobacteria	Defluviicoccales	NA	NA	NA
ASV_465	17.1232	3.24793	0.578025	5.61901	1.92057e-08	2.46835e-07	Bacteria	Proteobacteria	Alphaproteobacteria	Defluviicoccales	NA	NA	NA
ASV_568	15.2478	3.25739	0.458526	7.10404	1.21158e-12	2.17702e-11	Bacteria	Proteobacteria	Alphaproteobacteria	Defluviicoccales	NA	NA	NA
ASV_765	11.2242	3.2854	0.633715	5.18435	2.16772e-07	2.52474e-06	Bacteria	Proteobacteria	Alphaproteobacteria	Defluviicoccales	NA	NA	NA
ASV_960	9.36982	3.8052	0.570674	6.66792	2.59463e-11	4.25868e-10	Bacteria	Proteobacteria	Alphaproteobacteria	Defluviicoccales	NA	NA	NA
ASV_719	13.7014	3.97728	0.558426	7.1223	1.06138e-12	1.92185e-11	Bacteria	Proteobacteria	Alphaproteobacteria	Defluviicoccales	NA	NA	NA
ASV_718	13.1835	4.06249	0.485507	8.36754	5.88348e-17	1.40552e-15	Bacteria	Proteobacteria	Alphaproteobacteria	Defluviicoccales	NA	NA	NA
ASV_531	20.713	4.97537	0.582986	8.53428	1.41034e-17	3.50754e-16	Bacteria	Proteobacteria	Alphaproteobacteria	Defluviicoccales	NA	NA	NA
ASV_859	12.0289	4.99435	0.538422	9.2759	1.76124e-20	5.15123e-19	Bacteria	Proteobacteria	Alphaproteobacteria	Defluviicoccales	NA	NA	NA
ASV_608	12.3368	5.04712	0.475427	10.616	2.51148e-26	9.60448e-25	Bacteria	Proteobacteria	Alphaproteobacteria	Defluviicoccales	NA	NA	NA
ASV_1131	6.45181	1.59495	0.550335	2.89814	0.00375384	0.0225742	Bacteria	Proteobacteria	Alphaproteobacteria	Kiloniellales	Kiloniellaceae	NA	NA
ASV_6833	1.86137	1.59495	0.48017	3.32163	0.000894947	0.00615772	Bacteria	Proteobacteria	Alphaproteobacteria	Kiloniellales	Kiloniellaceae	NA	NA
ASV_1957	3.86269	1.65344	0.552058	2.99505	0.00274399	0.0169042	Bacteria	Proteobacteria	Alphaproteobacteria	Kiloniellales	Kiloniellaceae	NA	NA
ASV_2941	2.81305	1.66296	0.509043	3.26684	0.00108754	0.00733723	Bacteria	Proteobacteria	Alphaproteobacteria	Kiloniellales	Kiloniellaceae	NA	NA
ASV_7481	1.73541	1.66296	0.43578	3.81606	0.000135599	0.00108763	Bacteria	Proteobacteria	Alphaproteobacteria	Kiloniellales	Kiloniellaceae	NA	NA
ASV_7516	1.74941	1.67242	0.469187	3.56451	0.00036453	0.00271726	Bacteria	Proteobacteria	Alphaproteobacteria	Kiloniellales	Kiloniellaceae	NA	NA
ASV_7576	1.7774	1.70966	0.427379	4.00033	6.32538e-05	0.000534767	Bacteria	Proteobacteria	Alphaproteobacteria	Kiloniellales	Kiloniellaceae	NA	NA
ASV_7266	1.80539	1.75489	0.469122	3.74079	0.00018344	0.00143905	Bacteria	Proteobacteria	Alphaproteobacteria	Kiloniellales	Kiloniellaceae	NA	NA
ASV_6204	2.0573	1.77259	0.486891	3.64063	0.000271971	0.00207931	Bacteria	Proteobacteria	Alphaproteobacteria	Kiloniellales	Kiloniellaceae	NA	NA
ASV_7342	1.81938	1.77259	0.474505	3.73566	0.000187226	0.00146603	Bacteria	Proteobacteria	Alphaproteobacteria	Kiloniellales	Kiloniellaceae	NA	NA
ASV_7056	1.83338	1.79008	0.460381	3.88825	0.00010097	0.000826828	Bacteria	Proteobacteria	Alphaproteobacteria	Kiloniellales	Kiloniellaceae	NA	NA
ASV_709	13.7363	1.80735	0.457061	3.9543	7.67599e-05	0.00063945	Bacteria	Proteobacteria	Alphaproteobacteria	Kiloniellales	Kiloniellaceae	NA	NA
ASV_6757	1.96633	1.81592	0.442844	4.10058	4.12123e-05	0.00035793	Bacteria	Proteobacteria	Alphaproteobacteria	Kiloniellales	Kiloniellaceae	NA	NA
ASV_3623	2.76406	1.82443	0.508856	3.58535	0.000336625	0.00252832	Bacteria	Proteobacteria	Alphaproteobacteria	Kiloniellales	Kiloniellaceae	NA	NA
ASV_2987	1.91035	1.86625	0.482451	3.86826	0.000109613	0.00089332	Bacteria	Proteobacteria	Alphaproteobacteria	Kiloniellales	Kiloniellaceae	NA	NA
ASV_3201	2.84104	1.87447	0.497077	3.77098	0.000162608	0.00128614	Bacteria	Proteobacteria	Alphaproteobacteria	Kiloniellales	Kiloniellaceae	NA	NA
ASV_726	6.91366	1.89885	0.629539	3.01626	0.00255916	0.0159434	Bacteria	Proteobacteria	Alphaproteobacteria	Kiloniellales	Kiloniellaceae	NA	NA
ASV_6368	2.0503	1.9542	0.447024	4.37157	1.23355e-05	0.000114836	Bacteria	Proteobacteria	Alphaproteobacteria	Kiloniellales	Kiloniellaceae	NA	NA
ASV_4310	2.32321	2.01495	0.451668	4.46113	8.15297e-06	7.83862e-05	Bacteria	Proteobacteria	Alphaproteobacteria	Kiloniellales	Kiloniellaceae	NA	NA
ASV_3852	3.05097	2.06609	0.512274	4.03317	5.50293e-05	0.000469461	Bacteria	Proteobacteria	Alphaproteobacteria	Kiloniellales	Kiloniellaceae	NA	NA
ASV_2032	3.32387	2.07325	0.535554	3.87122	0.000108293	0.000883708	Bacteria	Proteobacteria	Alphaproteobacteria	Kiloniellales	Kiloniellaceae	NA	NA
ASV_5738	2.20425	2.18982	0.481756	4.54551	5.48029e-06	5.38218e-05	Bacteria	Proteobacteria	Alphaproteobacteria	Kiloniellales	Kiloniellaceae	NA	NA
ASV_5043	2.42118	2.22882	0.48417	4.60338	4.15691e-06	4.14962e-05	Bacteria	Proteobacteria	Alphaproteobacteria	Kiloniellales	Kiloniellaceae	NA	NA
ASV_1196	8.13124	2.26053	0.588264	3.84271	0.000121685	0.000985051	Bacteria	Proteobacteria	Alphaproteobacteria	Kiloniellales	Kiloniellaceae	NA	NA
ASV_679	12.7707	2.36831	0.631622	3.74957	0.000177136	0.001394	Bacteria	Proteobacteria	Alphaproteobacteria	Kiloniellales	Kiloniellaceae	NA	NA
ASV_5173	2.47016	2.38082	0.502027	4.74242	2.11183e-06	2.1981e-05	Bacteria	Proteobacteria	Alphaproteobacteria	Kiloniellales	Kiloniellaceae	NA	NA
ASV_2341	2.45617	2.39803	0.484544	4.94905	7.45783e-07	8.16059e-06	Bacteria	Proteobacteria	Alphaproteobacteria	Kiloniellales	Kiloniellaceae	NA	NA
ASV_1901	5.0243	2.45943	0.52668	4.66969	3.01653e-06	3.07499e-05	Bacteria	Proteobacteria	Alphaproteobacteria	Kiloniellales	Kiloniellaceae	NA	NA
ASV_4503	2.70108	2.48113	0.450906	5.50253	3.74379e-08	4.66781e-07	Bacteria	Proteobacteria	Alphaproteobacteria	Kiloniellales	Kiloniellaceae	NA	NA
ASV_4586	2.70108	2.56986	0.435998	5.8942	3.7651e-09	5.18042e-08	Bacteria	Proteobacteria	Alphaproteobacteria	Kiloniellales	Kiloniellaceae	NA	NA
ASV_588	11.2032	2.63904	0.552275	4.77849	1.7662e-06	1.8517e-05	Bacteria	Proteobacteria	Alphaproteobacteria	Kiloniellales	Kiloniellaceae	NA	NA
ASV_3100	2.79205	2.65344	0.517796	5.12449	2.98346e-07	3.42632e-06	Bacteria	Proteobacteria	Alphaproteobacteria	Kiloniellales	Kiloniellaceae	NA	NA
ASV_2389	4.91933	2.66296	0.547012	4.8682	1.12621e-06	1.20357e-05	Bacteria	Proteobacteria	Alphaproteobacteria	Kiloniellales	Kiloniellaceae	NA	NA
ASV_3368	3.51981	2.6677	0.532161	5.01296	5.35984e-07	5.96883e-06	Bacteria	Proteobacteria	Alphaproteobacteria	Kiloniellales	Kiloniellaceae	NA	NA
ASV_2504	4.28255	2.70506	0.480202	5.63316	1.76935e-08	2.29125e-07	Bacteria	Proteobacteria	Alphaproteobacteria	Kiloniellales	Kiloniellaceae	NA	NA
ASV_2678	4.35952	2.73696	0.492404	5.55837	2.72304e-08	3.44313e-07	Bacteria	Proteobacteria	Alphaproteobacteria	Kiloniellales	Kiloniellaceae	NA	NA
ASV_2442	4.47148	2.76376	0.493802	5.59691	2.18209e-08	2.78728e-07	Bacteria	Proteobacteria	Alphaproteobacteria	Kiloniellales	Kiloniellaceae	NA	NA
ASV_3036	3.93966	2.90288	0.515056	5.63604	1.74001e-08	2.25637e-07	Bacteria	Proteobacteria	Alphaproteobacteria	Kiloniellales	Kiloniellaceae	NA	NA
ASV_3705	3.33087	2.9542	0.517242	5.71144	1.12023e-08	1.47301e-07	Bacteria	Proteobacteria	Alphaproteobacteria	Kiloniellales	Kiloniellaceae	NA	NA
ASV_1839	6.02496	2.98489	0.510067	5.85196	4.85812e-09	6.63908e-08	Bacteria	Proteobacteria	Alphaproteobacteria	Kiloniellales	Kiloniellaceae	NA	NA
ASV_2579	3.8487	3.02975	0.488589	6.20102	5.61002e-10	8.29443e-09	Bacteria	Proteobacteria	Alphaproteobacteria	Kiloniellales	Kiloniellaceae	NA	NA
ASV_1059	6.33985	3.05528	0.652745	4.68067	2.85946e-06	2.92759e-05	Bacteria	Proteobacteria	Alphaproteobacteria	Kiloniellales	Kiloniellaceae	NA	NA
ASV_3369	3.62477	3.1224	0.518659	6.02013	1.74273e-09	2.48091e-08	Bacteria	Proteobacteria	Alphaproteobacteria	Kiloniellales	Kiloniellaceae	NA	NA
ASV_924	12.4698	3.12928	0.581926	5.37746	7.55437e-08	9.19899e-07	Bacteria	Proteobacteria	Alphaproteobacteria	Kiloniellales	Kiloniellaceae	NA	NA
ASV_235	31.7132	3.18653	0.636107	5.00942	5.45941e-07	6.06576e-06	Bacteria	Proteobacteria	Alphaproteobacteria	Kiloniellales	Kiloniellaceae	NA	NA
ASV_398	24.2818	3.22882	0.501	6.44475	1.15791e-10	1.81942e-09	Bacteria	Proteobacteria	Alphaproteobacteria	Kiloniellales	Kiloniellaceae	NA	NA
ASV_2568	4.36652	3.341	0.478593	6.98088	2.93333e-12	5.12363e-11	Bacteria	Proteobacteria	Alphaproteobacteria	Kiloniellales	Kiloniellaceae	NA	NA
ASV_1200	7.55044	3.4374	0.582208	5.90409	3.54609e-09	4.89236e-08	Bacteria	Proteobacteria	Alphaproteobacteria	Kiloniellales	Kiloniellaceae	NA	NA
ASV_2942	4.31054	3.4374	0.491917	6.98777	2.79284e-12	4.89189e-11	Bacteria	Proteobacteria	Alphaproteobacteria	Kiloniellales	Kiloniellaceae	NA	NA
ASV_470	19.9432	3.50779	0.437726	8.01367	1.11335e-15	2.45368e-14	Bacteria	Proteobacteria	Alphaproteobacteria	Kiloniellales	Kiloniellaceae	NA	NA
ASV_2357	5.07328	3.51832	0.555192	6.33713	2.34078e-10	3.60861e-09	Bacteria	Proteobacteria	Alphaproteobacteria	Kiloniellales	Kiloniellaceae	NA	NA
ASV_549	16.2135	3.56478	0.5459	6.5301	6.57252e-11	1.04587e-09	Bacteria	Proteobacteria	Alphaproteobacteria	Kiloniellales	Kiloniellaceae	NA	NA
ASV_2244	5.36718	3.58245	0.537295	6.66758	2.60063e-11	4.26481e-10	Bacteria	Proteobacteria	Alphaproteobacteria	Kiloniellales	Kiloniellaceae	NA	NA
ASV_2170	5.49314	3.58245	0.515982	6.94299	3.839e-12	6.6499e-11	Bacteria	Proteobacteria	Alphaproteobacteria	Kiloniellales	Kiloniellaceae	NA	NA
ASV_553	15.7377	3.59991	0.480164	7.49725	6.51682e-14	1.28267e-12	Bacteria	Proteobacteria	Alphaproteobacteria	Kiloniellales	Kiloniellaceae	NA	NA
ASV_2367	5.08028	3.69812	0.448884	8.23848	1.74411e-16	4.03811e-15	Bacteria	Proteobacteria	Alphaproteobacteria	Kiloniellales	Kiloniellaceae	NA	NA
ASV_2433	5.15025	3.73696	0.544261	6.86612	6.59712e-12	1.12818e-10	Bacteria	Proteobacteria	Alphaproteobacteria	Kiloniellales	Kiloniellaceae	NA	NA
ASV_684	10.5034	3.74819	0.62931	5.95604	2.58431e-09	3.60517e-08	Bacteria	Proteobacteria	Alphaproteobacteria	Kiloniellales	Kiloniellaceae	NA	NA
ASV_873	9.96462	3.81378	0.476827	7.99825	1.26198e-15	2.77473e-14	Bacteria	Proteobacteria	Alphaproteobacteria	Kiloniellales	Kiloniellaceae	NA	NA
ASV_2302	5.50014	3.84549	0.536732	7.16464	7.79924e-13	1.42458e-11	Bacteria	Proteobacteria	Alphaproteobacteria	Kiloniellales	Kiloniellaceae	NA	NA
ASV_967	10.1606	3.98299	0.500203	7.96275	1.68253e-15	3.65659e-14	Bacteria	Proteobacteria	Alphaproteobacteria	Kiloniellales	Kiloniellaceae	NA	NA
ASV_180	25.4994	4.04985	0.613519	6.60101	4.08372e-11	6.58762e-10	Bacteria	Proteobacteria	Alphaproteobacteria	Kiloniellales	Kiloniellaceae	NA	NA
ASV_293	27.7316	4.18531	0.506748	8.25915	1.46711e-16	3.42211e-15	Bacteria	Proteobacteria	Alphaproteobacteria	Kiloniellales	Kiloniellaceae	NA	NA
ASV_318	24.6736	4.25109	0.470924	9.02712	1.76251e-19	4.88123e-18	Bacteria	Proteobacteria	Alphaproteobacteria	Kiloniellales	Kiloniellaceae	NA	NA
ASV_1172	10.0416	4.62327	0.476739	9.6977	3.08384e-22	9.68314e-21	Bacteria	Proteobacteria	Alphaproteobacteria	Kiloniellales	Kiloniellaceae	NA	NA
ASV_544	16.4374	4.90488	0.538818	9.10305	8.78323e-20	2.48004e-18	Bacteria	Proteobacteria	Alphaproteobacteria	Kiloniellales	Kiloniellaceae	NA	NA
ASV_785	12.5188	4.93074	0.562259	8.76951	1.79451e-18	4.67345e-17	Bacteria	Proteobacteria	Alphaproteobacteria	Kiloniellales	Kiloniellaceae	NA	NA
ASV_91	54.5675	5.0279	0.431611	11.6492	2.31707e-31	1.08769e-29	Bacteria	Proteobacteria	Alphaproteobacteria	Kiloniellales	Kiloniellaceae	NA	NA
ASV_243	28.2704	5.39232	0.574504	9.38603	6.23047e-21	1.85403e-19	Bacteria	Proteobacteria	Alphaproteobacteria	Kiloniellales	Kiloniellaceae	NA	NA
ASV_270	33.5956	6.47438	0.500617	12.9328	2.93961e-38	1.80974e-36	Bacteria	Proteobacteria	Alphaproteobacteria	Kiloniellales	Kiloniellaceae	NA	NA
ASV_17	137.685	6.97178	0.442169	15.7672	5.22843e-56	5.01326e-54	Bacteria	Proteobacteria	Alphaproteobacteria	Kiloniellales	Kiloniellaceae	NA	NA
ASV_2119	4.57645	2.90689	0.535741	5.42592	5.76573e-08	7.09922e-07	Bacteria	Proteobacteria	Alphaproteobacteria	Kiloniellales	Kiloniellaceae	Pelagibius	NA
ASV_1664	6.99063	4.22239	0.576518	7.32395	2.40782e-13	4.60403e-12	Bacteria	Proteobacteria	Alphaproteobacteria	Kiloniellales	Kiloniellaceae	Pelagibius	NA
ASV_168	40.3273	6.30644	0.46416	13.5868	4.79725e-42	3.2637e-40	Bacteria	Proteobacteria	Alphaproteobacteria	Kiloniellales	Kiloniellaceae	Pelagibius	NA
ASV_1253	8.5511	3.88468	0.581314	6.68258	2.34767e-11	3.86008e-10	Bacteria	Proteobacteria	Alphaproteobacteria	Kiloniellales	NA	NA	NA
ASV_4970	2.54714	2.18322	0.52309	4.1737	2.99691e-05	0.000265815	Bacteria	Proteobacteria	Alphaproteobacteria	Kordiimonadales	Kordiimonadaceae	Kordiimonas	NA
ASV_1799	3.44283	2.3634	0.589971	4.00597	6.17643e-05	0.000523116	Bacteria	Proteobacteria	Alphaproteobacteria	Kordiimonadales	Kordiimonadaceae	Kordiimonas	NA
ASV_4880	2.6451	2.54432	0.517767	4.91403	8.9224e-07	9.66182e-06	Bacteria	Proteobacteria	Alphaproteobacteria	Kordiimonadales	Kordiimonadaceae	Kordiimonas	NA
ASV_1175	10.6224	3.92679	0.577279	6.80224	1.03006e-11	1.73155e-10	Bacteria	Proteobacteria	Alphaproteobacteria	Kordiimonadales	Kordiimonadaceae	Kordiimonas	NA
ASV_951	12.0149	4.37068	0.692748	6.3092	2.80476e-10	4.28171e-09	Bacteria	Proteobacteria	Alphaproteobacteria	Kordiimonadales	Kordiimonadaceae	Kordiimonas	NA
ASV_1478	8.10325	4.45121	0.550788	8.08153	6.39571e-16	1.42797e-14	Bacteria	Proteobacteria	Alphaproteobacteria	Kordiimonadales	Kordiimonadaceae	Kordiimonas	NA
ASV_399	24.6317	5.75377	0.619766	9.28378	1.63577e-20	4.80672e-19	Bacteria	Proteobacteria	Alphaproteobacteria	Kordiimonadales	Kordiimonadaceae	Kordiimonas	NA
ASV_3224	2.57513	2.1224	0.534023	3.97435	7.05706e-05	0.0005913	Bacteria	Proteobacteria	Alphaproteobacteria	Kordiimonadales	NA	NA	NA
ASV_4334	1.93834	1.59495	0.455382	3.50244	0.000461024	0.00336442	Bacteria	Proteobacteria	Alphaproteobacteria	NA	NA	NA	NA
ASV_1286	3.38685	1.59936	0.530738	3.01347	0.00258281	0.0160747	Bacteria	Proteobacteria	Alphaproteobacteria	NA	NA	NA	NA
ASV_1795	5.29021	1.65344	0.514718	3.21232	0.00131666	0.00877009	Bacteria	Proteobacteria	Alphaproteobacteria	NA	NA	NA	NA
ASV_2338	5.0033	1.83289	0.594069	3.08531	0.00203338	0.0129514	Bacteria	Proteobacteria	Alphaproteobacteria	NA	NA	NA	NA
ASV_2467	3.74373	1.91488	0.516558	3.707	0.000209728	0.00162932	Bacteria	Proteobacteria	Alphaproteobacteria	NA	NA	NA	NA
ASV_3711	2.96699	1.92283	0.541619	3.55016	0.000385	0.0028585	Bacteria	Proteobacteria	Alphaproteobacteria	NA	NA	NA	NA
ASV_2409	4.23356	1.98489	0.553165	3.58825	0.000332909	0.00250242	Bacteria	Proteobacteria	Alphaproteobacteria	NA	NA	NA	NA
ASV_3033	2.00832	1.99247	0.46871	4.25096	2.12856e-05	0.000191969	Bacteria	Proteobacteria	Alphaproteobacteria	NA	NA	NA	NA
ASV_2193	4.23356	2.07325	0.548398	3.78056	0.000156478	0.00124236	Bacteria	Proteobacteria	Alphaproteobacteria	NA	NA	NA	NA
ASV_928	10.4824	2.26053	0.538549	4.19744	2.6995e-05	0.0002408	Bacteria	Proteobacteria	Alphaproteobacteria	NA	NA	NA	NA
ASV_5244	2.37919	2.34577	0.447823	5.23817	1.62177e-07	1.91281e-06	Bacteria	Proteobacteria	Alphaproteobacteria	NA	NA	NA	NA
ASV_3102	3.19092	2.39232	0.51147	4.67734	2.90621e-06	2.97221e-05	Bacteria	Proteobacteria	Alphaproteobacteria	NA	NA	NA	NA
ASV_3145	3.89068	2.47573	0.536225	4.61697	3.89389e-06	3.90366e-05	Bacteria	Proteobacteria	Alphaproteobacteria	NA	NA	NA	NA
ASV_3159	3.44983	2.50779	0.563033	4.45408	8.42539e-06	8.07161e-05	Bacteria	Proteobacteria	Alphaproteobacteria	NA	NA	NA	NA
ASV_3402	3.47782	2.57491	0.481796	5.34439	9.07196e-08	1.09546e-06	Bacteria	Proteobacteria	Alphaproteobacteria	NA	NA	NA	NA
ASV_775	11.7	2.61471	0.592586	4.41237	1.02247e-05	9.65251e-05	Bacteria	Proteobacteria	Alphaproteobacteria	NA	NA	NA	NA
ASV_2443	4.38751	3.112	0.490194	6.34851	2.17408e-10	3.35989e-09	Bacteria	Proteobacteria	Alphaproteobacteria	NA	NA	NA	NA
ASV_2925	4.35252	3.45396	0.543555	6.35438	2.09265e-10	3.23671e-09	Bacteria	Proteobacteria	Alphaproteobacteria	NA	NA	NA	NA
ASV_1648	7.0746	3.62205	0.582544	6.21764	5.04677e-10	7.50302e-09	Bacteria	Proteobacteria	Alphaproteobacteria	NA	NA	NA	NA
ASV_174	25.7933	3.70966	0.555957	6.67256	2.51383e-11	4.12967e-10	Bacteria	Proteobacteria	Alphaproteobacteria	NA	NA	NA	NA
ASV_120	34.2464	3.99435	0.611361	6.53354	6.4234e-11	1.02387e-09	Bacteria	Proteobacteria	Alphaproteobacteria	NA	NA	NA	NA
ASV_760	15.1499	5.42486	0.575535	9.42577	4.26957e-21	1.28272e-19	Bacteria	Proteobacteria	Alphaproteobacteria	NA	NA	NA	NA
ASV_425	21.0069	5.89986	0.540438	10.9168	9.58094e-28	3.89397e-26	Bacteria	Proteobacteria	Alphaproteobacteria	NA	NA	NA	NA
ASV_7488	1.81239	1.76377	0.476596	3.70076	0.000214958	0.00166444	Bacteria	Proteobacteria	Alphaproteobacteria	Parvibaculales	PS1_clade	NA	NA
ASV_5480	1.92435	1.88264	0.447156	4.21025	2.55083e-05	0.000228081	Bacteria	Proteobacteria	Alphaproteobacteria	Parvibaculales	PS1_clade	NA	NA
ASV_1551	6.52179	1.93074	0.590972	3.26705	0.00108674	0.00733723	Bacteria	Proteobacteria	Alphaproteobacteria	Parvibaculales	PS1_clade	NA	NA
ASV_1751	5.96198	1.94642	0.565938	3.43928	0.000583266	0.00417219	Bacteria	Proteobacteria	Alphaproteobacteria	Parvibaculales	PS1_clade	NA	NA
ASV_5677	2.21825	2.20294	0.49055	4.49075	7.09724e-06	6.87641e-05	Bacteria	Proteobacteria	Alphaproteobacteria	Parvibaculales	PS1_clade	NA	NA
ASV_3509	2.59612	2.42626	0.474368	5.11473	3.1419e-07	3.60167e-06	Bacteria	Proteobacteria	Alphaproteobacteria	Parvibaculales	PS1_clade	NA	NA
ASV_3104	3.30988	2.97346	0.490435	6.0629	1.33687e-09	1.92356e-08	Bacteria	Proteobacteria	Alphaproteobacteria	Parvibaculales	PS1_clade	NA	NA
ASV_3696	3.37286	3.00749	0.505305	5.95183	2.65156e-09	3.69349e-08	Bacteria	Proteobacteria	Alphaproteobacteria	Parvibaculales	PS1_clade	NA	NA
ASV_1729	6.38184	3.5725	0.533978	6.69034	2.2265e-11	3.6802e-10	Bacteria	Proteobacteria	Alphaproteobacteria	Parvibaculales	PS1_clade	NA	NA
ASV_2158	5.41616	3.70505	0.55433	6.68384	2.32764e-11	3.83051e-10	Bacteria	Proteobacteria	Alphaproteobacteria	Parvibaculales	PS1_clade	NA	NA
ASV_7790	1.72142	1.64386	0.45233	3.6342	0.000278848	0.0021293	Bacteria	Proteobacteria	Alphaproteobacteria	Rhizobiales	Hyphomicrobiaceae	Filomicrobium	NA
ASV_6590	1.85437	1.81592	0.430775	4.21546	2.49266e-05	0.000223411	Bacteria	Proteobacteria	Alphaproteobacteria	Rhizobiales	Hyphomicrobiaceae	Filomicrobium	NA
ASV_5511	2.00132	1.98489	0.431177	4.60343	4.15589e-06	4.14962e-05	Bacteria	Proteobacteria	Alphaproteobacteria	Rhizobiales	Hyphomicrobiaceae	Filomicrobium	NA
ASV_4588	2.75007	2.62936	0.467156	5.62844	1.81849e-08	2.35164e-07	Bacteria	Proteobacteria	Alphaproteobacteria	Rhizobiales	Hyphomicrobiaceae	Filomicrobium	NA
ASV_3734	3.2329	2.93074	0.484611	6.04761	1.4701e-09	2.10396e-08	Bacteria	Proteobacteria	Alphaproteobacteria	Rhizobiales	Hyphomicrobiaceae	Filomicrobium	NA
ASV_3473	3.37286	3.00749	0.468237	6.42301	1.33605e-10	2.08537e-09	Bacteria	Proteobacteria	Alphaproteobacteria	Rhizobiales	Hyphomicrobiaceae	Filomicrobium	NA
ASV_5505	1.88236	1.76377	0.399762	4.41204	1.02403e-05	9.66243e-05	Bacteria	Proteobacteria	Alphaproteobacteria	Rhizobiales	Hyphomicrobiaceae	NA	NA
ASV_4035	2.99498	2.60486	0.430261	6.05415	1.41162e-09	2.02336e-08	Bacteria	Proteobacteria	Alphaproteobacteria	Rhizobiales	Hyphomicrobiaceae	NA	NA
ASV_2653	4.59044	2.9386	0.52078	5.64268	1.67421e-08	2.17254e-07	Bacteria	Proteobacteria	Alphaproteobacteria	Rhizobiales	Hyphomicrobiaceae	NA	NA
ASV_1271	9.62874	3.89482	0.591171	6.58831	4.44861e-11	7.13945e-10	Bacteria	Proteobacteria	Alphaproteobacteria	Rhizobiales	Hyphomicrobiaceae	NA	NA
ASV_624	13.6734	5.25739	0.515107	10.2064	1.85624e-24	6.60127e-23	Bacteria	Proteobacteria	Alphaproteobacteria	Rhizobiales	Hyphomicrobiaceae	NA	NA
ASV_276	20.762	5.26913	0.514919	10.2329	1.41207e-24	5.07939e-23	Bacteria	Proteobacteria	Alphaproteobacteria	Rhizobiales	Hyphomicrobiaceae	NA	NA
ASV_99	49.2003	6.30111	0.431877	14.5901	3.24923e-48	2.53157e-46	Bacteria	Proteobacteria	Alphaproteobacteria	Rhizobiales	Hyphomicrobiaceae	NA	NA
ASV_386	28.3684	6.35718	0.52564	12.0942	1.13371e-33	6.03053e-32	Bacteria	Proteobacteria	Alphaproteobacteria	Rhizobiales	Hyphomicrobiaceae	NA	NA
ASV_59	76.4911	7.64731	0.514567	14.8616	5.84807e-50	4.92418e-48	Bacteria	Proteobacteria	Alphaproteobacteria	Rhizobiales	Hyphomicrobiaceae	NA	NA
ASV_20	161.904	8.67051	0.427858	20.2649	2.62437e-91	5.47532e-89	Bacteria	Proteobacteria	Alphaproteobacteria	Rhizobiales	Hyphomicrobiaceae	NA	NA
ASV_1949	4.80037	1.6272	0.528421	3.07936	0.00207448	0.0131998	Bacteria	Proteobacteria	Alphaproteobacteria	Rhizobiales	KF-JG30-B3	NA	NA
ASV_2165	4.10761	2.1224	0.534789	3.96866	7.22778e-05	0.000604795	Bacteria	Proteobacteria	Alphaproteobacteria	Rhizobiales	KF-JG30-B3	NA	NA
ASV_1269	8.2502	2.62449	0.507504	5.17137	2.32381e-07	2.70014e-06	Bacteria	Proteobacteria	Alphaproteobacteria	Rhizobiales	KF-JG30-B3	NA	NA
ASV_1301	7.94931	2.74004	0.492984	5.55806	2.72794e-08	3.44701e-07	Bacteria	Proteobacteria	Alphaproteobacteria	Rhizobiales	KF-JG30-B3	NA	NA
ASV_5391	2.19026	1.78136	0.465488	3.82686	0.000129788	0.00104325	Bacteria	Proteobacteria	Alphaproteobacteria	Rhizobiales	Methyloligellaceae	Methyloceanibacter	NA
ASV_781	14.4011	5.28231	0.545521	9.68306	3.55908e-22	1.10644e-20	Bacteria	Proteobacteria	Alphaproteobacteria	Rhizobiales	Methyloligellaceae	Methyloceanibacter	NA
ASV_539	19.8383	5.80359	0.500532	11.5949	4.37625e-31	2.02896e-29	Bacteria	Proteobacteria	Alphaproteobacteria	Rhizobiales	Methyloligellaceae	Methyloceanibacter	NA
ASV_7163	1.74241	1.67242	0.440623	3.79559	0.000147291	0.00117538	Bacteria	Proteobacteria	Alphaproteobacteria	Rhizobiales	Methyloligellaceae	NA	NA
ASV_6420	1.81239	1.72792	0.470721	3.67079	0.000241801	0.00186307	Bacteria	Proteobacteria	Alphaproteobacteria	Rhizobiales	Methyloligellaceae	NA	NA
ASV_6872	1.92435	1.89885	0.46505	4.08312	4.44356e-05	0.000383617	Bacteria	Proteobacteria	Alphaproteobacteria	Rhizobiales	Methyloligellaceae	NA	NA
ASV_2294	3.72274	2.46488	0.597398	4.12603	3.69076e-05	0.000322482	Bacteria	Proteobacteria	Alphaproteobacteria	Rhizobiales	Methyloligellaceae	NA	NA
ASV_2838	3.39385	2.82866	0.49469	5.71806	1.07748e-08	1.42078e-07	Bacteria	Proteobacteria	Alphaproteobacteria	Rhizobiales	Methyloligellaceae	NA	NA
ASV_1173	7.26354	3.2699	0.690283	4.73705	2.16857e-06	2.25591e-05	Bacteria	Proteobacteria	Alphaproteobacteria	Rhizobiales	Methyloligellaceae	NA	NA
ASV_1358	8.5511	4.55203	0.531985	8.55668	1.16166e-17	2.9006e-16	Bacteria	Proteobacteria	Alphaproteobacteria	Rhizobiales	Methyloligellaceae	NA	NA
ASV_1040	10.8883	4.85798	0.539558	9.00362	2.1839e-19	6.01277e-18	Bacteria	Proteobacteria	Alphaproteobacteria	Rhizobiales	Methyloligellaceae	NA	NA
ASV_458	24.8136	6.16658	0.56131	10.986	4.46037e-28	1.84071e-26	Bacteria	Proteobacteria	Alphaproteobacteria	Rhizobiales	Methyloligellaceae	NA	NA
ASV_135	50.152	6.33739	0.4951	12.8002	1.63496e-37	9.65399e-36	Bacteria	Proteobacteria	Alphaproteobacteria	Rhizobiales	Methyloligellaceae	NA	NA
ASV_219	36.4087	6.40514	0.498439	12.8504	8.55782e-38	5.13387e-36	Bacteria	Proteobacteria	Alphaproteobacteria	Rhizobiales	Methyloligellaceae	NA	NA
ASV_339	32.2241	6.55363	0.585231	11.1984	4.15396e-29	1.78897e-27	Bacteria	Proteobacteria	Alphaproteobacteria	Rhizobiales	Methyloligellaceae	NA	NA
ASV_3859	2.83404	2.51307	0.495884	5.06785	4.02328e-07	4.55915e-06	Bacteria	Proteobacteria	Alphaproteobacteria	Rhizobiales	Rhizobiaceae	Cohaesibacter	NA
ASV_3362	2.939	2.75489	0.478719	5.75471	8.67915e-09	1.16074e-07	Bacteria	Proteobacteria	Alphaproteobacteria	Rhizobiales	Rhizobiaceae	Cohaesibacter	NA
ASV_3112	3.68075	2.82443	0.536662	5.26295	1.4176e-07	1.68151e-06	Bacteria	Proteobacteria	Alphaproteobacteria	Rhizobiales	Rhizobiaceae	Cohaesibacter	NA
ASV_2100	4.97531	2.8371	0.605564	4.68505	2.79885e-06	2.86711e-05	Bacteria	Proteobacteria	Alphaproteobacteria	Rhizobiales	Rhizobiaceae	Cohaesibacter	NA
ASV_1723	6.2069	3.8434	0.49568	7.75379	8.91925e-15	1.86708e-13	Bacteria	Proteobacteria	Alphaproteobacteria	Rhizobiales	Rhizobiaceae	Cohaesibacter	NA
ASV_984	8.40415	4.36632	0.563186	7.75289	8.98238e-15	1.8782e-13	Bacteria	Proteobacteria	Alphaproteobacteria	Rhizobiales	Rhizobiaceae	Cohaesibacter	NA
ASV_814	13.0086	4.43879	0.595598	7.45266	9.14742e-14	1.79291e-12	Bacteria	Proteobacteria	Alphaproteobacteria	Rhizobiales	Rhizobiaceae	Cohaesibacter	NA
ASV_1170	8.77503	4.58621	0.493248	9.29798	1.43138e-20	4.21269e-19	Bacteria	Proteobacteria	Alphaproteobacteria	Rhizobiales	Rhizobiaceae	Cohaesibacter	NA
ASV_284	27.7386	6.19721	0.504551	12.2826	1.12287e-34	6.05865e-33	Bacteria	Proteobacteria	Alphaproteobacteria	Rhizobiales	Rhizobiaceae	Cohaesibacter	NA
ASV_4891	2.40718	2.35167	0.473433	4.96728	6.7898e-07	7.44696e-06	Bacteria	Proteobacteria	Alphaproteobacteria	Rhizobiales	Rhizobiales_Incertae_Sedis	Anderseniella	NA
ASV_3952	3.05796	2.70044	0.523593	5.15752	2.50247e-07	2.9012e-06	Bacteria	Proteobacteria	Alphaproteobacteria	Rhizobiales	Rhizobiales_Incertae_Sedis	Anderseniella	NA
ASV_7401	1.80539	1.75489	0.463726	3.78432	0.00015413	0.0012258	Bacteria	Proteobacteria	Alphaproteobacteria	Rhodobacterales	Rhodobacteraceae	Actibacterium	NA
ASV_4551	2.49815	1.94642	0.479218	4.06166	4.87258e-05	0.00041873	Bacteria	Proteobacteria	Alphaproteobacteria	Rhodobacterales	Rhodobacteraceae	Limibaculum	NA
ASV_303	22.0495	2.05367	0.423853	4.84525	1.26455e-06	1.34377e-05	Bacteria	Proteobacteria	Alphaproteobacteria	Rhodobacterales	Rhodobacteraceae	Limibaculum	NA
ASV_1292	7.71838	2.09452	0.535447	3.91172	9.16414e-05	0.000755378	Bacteria	Proteobacteria	Alphaproteobacteria	Rhodobacterales	Rhodobacteraceae	Limibaculum	NA
ASV_2724	3.51981	2.29155	0.554177	4.13506	3.54865e-05	0.000311369	Bacteria	Proteobacteria	Alphaproteobacteria	Rhodobacterales	Rhodobacteraceae	Limibaculum	NA
ASV_313	27.0178	3.00375	0.523885	5.73361	9.83168e-09	1.30282e-07	Bacteria	Proteobacteria	Alphaproteobacteria	Rhodobacterales	Rhodobacteraceae	Limibaculum	NA
ASV_691	14.2682	3.29462	0.612799	5.37635	7.60112e-08	9.24992e-07	Bacteria	Proteobacteria	Alphaproteobacteria	Rhodobacterales	Rhodobacteraceae	Limibaculum	NA
ASV_477	16.4304	3.32012	0.409158	8.11453	4.8767e-16	1.09796e-14	Bacteria	Proteobacteria	Alphaproteobacteria	Rhodobacterales	Rhodobacteraceae	Limibaculum	NA
ASV_2234	4.63243	3.3339	0.485901	6.86127	6.82497e-12	1.16396e-10	Bacteria	Proteobacteria	Alphaproteobacteria	Rhodobacterales	Rhodobacteraceae	Limibaculum	NA
ASV_131	43.1614	4.15987	0.436262	9.53527	1.49503e-21	4.57946e-20	Bacteria	Proteobacteria	Alphaproteobacteria	Rhodobacterales	Rhodobacteraceae	Limibaculum	NA
ASV_237	27.8436	4.25442	0.485401	8.76475	1.87188e-18	4.86146e-17	Bacteria	Proteobacteria	Alphaproteobacteria	Rhodobacterales	Rhodobacteraceae	Limibaculum	NA
ASV_2477	4.59744	3	0.525085	5.71336	1.10767e-08	1.45752e-07	Bacteria	Proteobacteria	Alphaproteobacteria	Rhodobacterales	Rhodobacteraceae	NA	NA
ASV_1932	5.08028	3.07325	0.520989	5.89888	3.65986e-09	5.04561e-08	Bacteria	Proteobacteria	Alphaproteobacteria	Rhodobacterales	Rhodobacteraceae	NA	NA
ASV_658	12.9876	4.00375	0.572605	6.99217	2.70676e-12	4.74555e-11	Bacteria	Proteobacteria	Alphaproteobacteria	Rhodobacterales	Rhodobacteraceae	Roseobacter_clade_NAC11-7_lineage	NA
ASV_2420	3.91867	3.22239	0.475565	6.77592	1.23619e-11	2.06695e-10	Bacteria	Proteobacteria	Alphaproteobacteria	Rhodobacterales	Rhodobacteraceae	Thalassobius	NA
ASV_2333	4.66742	3.55459	0.489715	7.25848	3.91461e-13	7.35141e-12	Bacteria	Proteobacteria	Alphaproteobacteria	Rhodobacterales	Rhodobacteraceae	Thalassobius	NA
ASV_5591	2.16227	2.06609	0.454535	4.5455	5.4805e-06	5.38218e-05	Bacteria	Proteobacteria	Alphaproteobacteria	Rhodospirillales	Magnetospiraceae	Magnetospira	NA
ASV_2802	3.72274	2.22239	0.484116	4.59062	4.41933e-06	4.39988e-05	Bacteria	Proteobacteria	Alphaproteobacteria	Rhodospirillales	Magnetospiraceae	Magnetospira	NA
ASV_8215	1.68643	1.59495	0.473061	3.37154	0.000747479	0.00522151	Bacteria	Proteobacteria	Alphaproteobacteria	Rhodospirillales	Magnetospiraceae	NA	NA
ASV_3365	2.09229	1.85798	0.475284	3.9092	9.26006e-05	0.00076295	Bacteria	Proteobacteria	Alphaproteobacteria	Rhodospirillales	Magnetospiraceae	NA	NA
ASV_3733	2.60312	1.97728	0.520642	3.79777	0.000146001	0.00116559	Bacteria	Proteobacteria	Alphaproteobacteria	Rhodospirillales	Magnetospiraceae	NA	NA
ASV_5873	2.0713	2	0.480325	4.16385	3.12927e-05	0.00027625	Bacteria	Proteobacteria	Alphaproteobacteria	Rhodospirillales	Magnetospiraceae	NA	NA
ASV_3870	2.58212	2.00749	0.451456	4.44671	8.7195e-06	8.32364e-05	Bacteria	Proteobacteria	Alphaproteobacteria	Rhodospirillales	Magnetospiraceae	NA	NA
ASV_5217	2.18326	2.05166	0.499423	4.10806	3.98992e-05	0.000347329	Bacteria	Proteobacteria	Alphaproteobacteria	Rhodospirillales	Magnetospiraceae	NA	NA
ASV_5374	2.19726	2.12928	0.488148	4.36196	1.289e-05	0.000119642	Bacteria	Proteobacteria	Alphaproteobacteria	Rhodospirillales	Magnetospiraceae	NA	NA
ASV_1465	2.31621	2.17659	0.505077	4.30942	1.63683e-05	0.000150293	Bacteria	Proteobacteria	Alphaproteobacteria	Rhodospirillales	Magnetospiraceae	NA	NA
ASV_3611	2.87603	2.18322	0.551833	3.95631	7.61175e-05	0.00063438	Bacteria	Proteobacteria	Alphaproteobacteria	Rhodospirillales	Magnetospiraceae	NA	NA
ASV_5130	2.47716	2.20945	0.511505	4.31951	1.56373e-05	0.000143791	Bacteria	Proteobacteria	Alphaproteobacteria	Rhodospirillales	Magnetospiraceae	NA	NA
ASV_5808	2.25324	2.23522	0.506434	4.41364	1.01648e-05	9.61531e-05	Bacteria	Proteobacteria	Alphaproteobacteria	Rhodospirillales	Magnetospiraceae	NA	NA
ASV_5023	2.28123	2.25424	0.466525	4.83198	1.35183e-06	1.43409e-05	Bacteria	Proteobacteria	Alphaproteobacteria	Rhodospirillales	Magnetospiraceae	NA	NA
ASV_3522	2.67309	2.57491	0.52802	4.87653	1.07967e-06	1.15713e-05	Bacteria	Proteobacteria	Alphaproteobacteria	Rhodospirillales	Magnetospiraceae	NA	NA
ASV_2374	2.82004	2.67713	0.516006	5.18818	2.12356e-07	2.47665e-06	Bacteria	Proteobacteria	Alphaproteobacteria	Rhodospirillales	Magnetospiraceae	NA	NA
ASV_2175	5.05929	2.85383	0.614687	4.64273	3.43829e-06	3.47662e-05	Bacteria	Proteobacteria	Alphaproteobacteria	Rhodospirillales	Magnetospiraceae	NA	NA
ASV_1634	5.82203	2.91089	0.663592	4.38657	1.15154e-05	0.000107575	Bacteria	Proteobacteria	Alphaproteobacteria	Rhodospirillales	Magnetospiraceae	NA	NA
ASV_1739	5.899	2.91089	0.660366	4.408	1.0433e-05	9.81467e-05	Bacteria	Proteobacteria	Alphaproteobacteria	Rhodospirillales	Magnetospiraceae	NA	NA
ASV_2990	3.44283	2.93074	0.523537	5.59795	2.16901e-08	2.77246e-07	Bacteria	Proteobacteria	Alphaproteobacteria	Rhodospirillales	Magnetospiraceae	NA	NA
ASV_2798	4.36652	3	0.517887	5.79277	6.92345e-09	9.34592e-08	Bacteria	Proteobacteria	Alphaproteobacteria	Rhodospirillales	Magnetospiraceae	NA	NA
ASV_1317	8.20122	3.25424	0.605449	5.37492	7.66172e-08	9.3116e-07	Bacteria	Proteobacteria	Alphaproteobacteria	Rhodospirillales	Magnetospiraceae	NA	NA
ASV_1906	5.93399	3.55714	0.491877	7.23178	4.76719e-13	8.88031e-12	Bacteria	Proteobacteria	Alphaproteobacteria	Rhodospirillales	Magnetospiraceae	NA	NA
ASV_375	18.4178	3.69581	0.676217	5.46542	4.61818e-08	5.73137e-07	Bacteria	Proteobacteria	Alphaproteobacteria	Rhodospirillales	Magnetospiraceae	NA	NA
ASV_1791	6.26987	3.75711	0.628026	5.98241	2.19857e-09	3.09232e-08	Bacteria	Proteobacteria	Alphaproteobacteria	Rhodospirillales	Magnetospiraceae	NA	NA
ASV_851	11.889	3.86212	0.545977	7.07377	1.50777e-12	2.68355e-11	Bacteria	Proteobacteria	Alphaproteobacteria	Rhodospirillales	Magnetospiraceae	NA	NA
ASV_1657	6.54278	4.12756	0.565435	7.2998	2.88205e-13	5.46629e-12	Bacteria	Proteobacteria	Alphaproteobacteria	Rhodospirillales	Magnetospiraceae	NA	NA
ASV_441	10.0766	4.34873	0.631144	6.89022	5.57046e-12	9.57219e-11	Bacteria	Proteobacteria	Alphaproteobacteria	Rhodospirillales	Magnetospiraceae	NA	NA
ASV_157	34.9112	4.90589	0.580089	8.45713	2.7405e-17	6.6829e-16	Bacteria	Proteobacteria	Alphaproteobacteria	Rhodospirillales	Magnetospiraceae	NA	NA
ASV_50	75.9593	5.42836	0.547052	9.92293	3.30889e-23	1.09193e-21	Bacteria	Proteobacteria	Alphaproteobacteria	Rhodospirillales	Magnetospiraceae	NA	NA
ASV_690	16.0386	5.4865	0.594355	9.23101	2.6808e-20	7.80424e-19	Bacteria	Proteobacteria	Alphaproteobacteria	Rhodospirillales	Magnetospiraceae	NA	NA
ASV_184	22.0495	5.54496	0.571478	9.70285	2.93205e-22	9.22197e-21	Bacteria	Proteobacteria	Alphaproteobacteria	Rhodospirillales	Magnetospiraceae	NA	NA
ASV_35	89.1498	5.81592	0.450861	12.8996	4.52569e-38	2.76804e-36	Bacteria	Proteobacteria	Alphaproteobacteria	Rhodospirillales	Magnetospiraceae	NA	NA
ASV_294	20.671	5.85435	0.553013	10.5863	3.45083e-26	1.31432e-24	Bacteria	Proteobacteria	Alphaproteobacteria	Rhodospirillales	Magnetospiraceae	NA	NA
ASV_195	34.3514	6.12928	0.631294	9.70907	2.75832e-22	8.6901e-21	Bacteria	Proteobacteria	Alphaproteobacteria	Rhodospirillales	Magnetospiraceae	NA	NA
ASV_100	52.1883	6.58934	0.500305	13.1706	1.29494e-39	8.41352e-38	Bacteria	Proteobacteria	Alphaproteobacteria	Rhodospirillales	Magnetospiraceae	NA	NA
ASV_6962	1.91735	1.89077	0.481494	3.92688	8.6055e-05	0.000711517	Bacteria	Proteobacteria	Alphaproteobacteria	Sphingomonadales	Sphingomonadaceae	Parasphingopyxis	NA
ASV_2567	3.78572	3.2127	0.530456	6.05648	1.39131e-09	1.9973e-08	Bacteria	Proteobacteria	Alphaproteobacteria	Sphingomonadales	Sphingomonadaceae	Sphingorhabdus	NA
ASV_1067	10.9653	4.93762	0.551003	8.96115	3.21306e-19	8.76913e-18	Bacteria	Proteobacteria	Alphaproteobacteria	Sphingomonadales	Sphingomonadaceae	Sphingorhabdus	NA
ASV_6871	1.86837	1.69116	0.435779	3.88078	0.000104123	0.000851528	Bacteria	Proteobacteria	Alphaproteobacteria	Tistrellales	Geminicoccaceae	Arboricoccus	NA
ASV_5701	2.12028	2.03709	0.479383	4.2494	2.14347e-05	0.000193129	Bacteria	Proteobacteria	Alphaproteobacteria	Tistrellales	Geminicoccaceae	NA	NA
ASV_4145	2.53314	2.47032	0.47209	5.23273	1.67024e-07	1.96751e-06	Bacteria	Proteobacteria	Alphaproteobacteria	Tistrellales	Geminicoccaceae	NA	NA
ASV_3188	3.8347	3.21594	0.485872	6.61889	3.61898e-11	5.86818e-10	Bacteria	Proteobacteria	Alphaproteobacteria	Tistrellales	Geminicoccaceae	NA	NA
ASV_3055	2.97399	1.92283	0.548197	3.50756	0.000452239	0.0033106	Bacteria	Proteobacteria	Gammaproteobacteria	Alteromonadales	Colwelliaceae	Colwellia	NA
ASV_547	21.0699	2.57885	0.660736	3.903	9.50086e-05	0.000780734	Bacteria	Proteobacteria	Gammaproteobacteria	Alteromonadales	Shewanellaceae	Psychrobium	NA
ASV_1496	7.34751	1.60486	0.536286	2.99255	0.00276657	0.0170321	Bacteria	Proteobacteria	Gammaproteobacteria	AT-s2-59	NA	NA	NA
ASV_4122	2.72208	1.78136	0.521124	3.4183	0.000630134	0.00448523	Bacteria	Proteobacteria	Gammaproteobacteria	AT-s2-59	NA	NA	NA
ASV_979	8.02628	1.78136	0.521054	3.41876	0.00062907	0.00447935	Bacteria	Proteobacteria	Gammaproteobacteria	AT-s2-59	NA	NA	NA
ASV_1072	8.89399	2.36923	0.54154	4.37499	1.21436e-05	0.000113162	Bacteria	Proteobacteria	Gammaproteobacteria	AT-s2-59	NA	NA	NA
ASV_66	75.1195	5.2854	0.485924	10.877	1.48349e-27	6.00335e-26	Bacteria	Proteobacteria	Gammaproteobacteria	AT-s2-59	NA	NA	NA
ASV_3724	1.69343	1.60486	0.470582	3.41038	0.000648727	0.00460535	Bacteria	Proteobacteria	Gammaproteobacteria	BD7-8	NA	NA	NA
ASV_6897	1.91735	1.70966	0.410408	4.16575	3.10327e-05	0.000274341	Bacteria	Proteobacteria	Gammaproteobacteria	BD7-8	NA	NA	NA
ASV_961	7.48046	1.86625	0.537681	3.47092	0.000518675	0.00374727	Bacteria	Proteobacteria	Gammaproteobacteria	BD7-8	NA	NA	NA
ASV_5078	2.21825	2.20294	0.460344	4.78542	1.70632e-06	1.79292e-05	Bacteria	Proteobacteria	Gammaproteobacteria	BD7-8	NA	NA	NA
ASV_3609	2.61711	2.22239	0.477174	4.6574	3.20225e-06	3.24844e-05	Bacteria	Proteobacteria	Gammaproteobacteria	BD7-8	NA	NA	NA
ASV_2560	4.45749	2.23522	0.552959	4.04228	5.2933e-05	0.000452269	Bacteria	Proteobacteria	Gammaproteobacteria	BD7-8	NA	NA	NA
ASV_5172	2.3652	2.30985	0.502827	4.59374	4.35377e-06	4.33691e-05	Bacteria	Proteobacteria	Gammaproteobacteria	BD7-8	NA	NA	NA
ASV_1888	3.40085	2.32193	0.546895	4.24565	2.1796e-05	0.000196289	Bacteria	Proteobacteria	Gammaproteobacteria	BD7-8	NA	NA	NA
ASV_514	17.3401	2.50779	0.481248	5.21102	1.87807e-07	2.20266e-06	Bacteria	Proteobacteria	Gammaproteobacteria	BD7-8	NA	NA	NA
ASV_2546	2.6661	2.54946	0.538389	4.73536	2.18669e-06	2.27225e-05	Bacteria	Proteobacteria	Gammaproteobacteria	BD7-8	NA	NA	NA
ASV_1510	7.63441	2.61471	0.556868	4.69538	2.6611e-06	2.73794e-05	Bacteria	Proteobacteria	Gammaproteobacteria	BD7-8	NA	NA	NA
ASV_2499	4.66742	3.45121	0.541029	6.37897	1.78281e-10	2.76203e-09	Bacteria	Proteobacteria	Gammaproteobacteria	BD7-8	NA	NA	NA
ASV_1042	4.74439	3.55969	0.547221	6.50504	7.76736e-11	1.22974e-09	Bacteria	Proteobacteria	Gammaproteobacteria	BD7-8	NA	NA	NA
ASV_1897	5.50014	3.73245	0.479793	7.77929	7.29322e-15	1.53354e-13	Bacteria	Proteobacteria	Gammaproteobacteria	BD7-8	NA	NA	NA
ASV_266	14.0162	3.82114	0.608807	6.27645	3.46397e-10	5.22853e-09	Bacteria	Proteobacteria	Gammaproteobacteria	BD7-8	NA	NA	NA
ASV_354	23.582	4.22721	0.534518	7.90845	2.60606e-15	5.60528e-14	Bacteria	Proteobacteria	Gammaproteobacteria	BD7-8	NA	NA	NA
ASV_897	12.8756	4.42626	0.61759	7.16699	7.66622e-13	1.40301e-11	Bacteria	Proteobacteria	Gammaproteobacteria	BD7-8	NA	NA	NA
ASV_801	12.4208	4.91985	0.56568	8.69725	3.40036e-18	8.6987e-17	Bacteria	Proteobacteria	Gammaproteobacteria	BD7-8	NA	NA	NA
ASV_6	245.631	7.89338	0.338596	23.3121	3.33959e-120	1.02799e-117	Bacteria	Proteobacteria	Gammaproteobacteria	BD7-8	NA	NA	NA
ASV_2432	3.91167	2.90288	0.526681	5.51164	3.55507e-08	4.44727e-07	Bacteria	Proteobacteria	Gammaproteobacteria	Burkholderiales	Burkholderiaceae	Burkholderia-Caballeronia-Paraburkholderia	NA
ASV_2375	4.37352	3.36632	0.491069	6.85509	7.12662e-12	1.21211e-10	Bacteria	Proteobacteria	Gammaproteobacteria	Burkholderiales	Burkholderiaceae	Burkholderia-Caballeronia-Paraburkholderia	NA
ASV_23	41.9928	6.30476	0.579689	10.8761	1.49827e-27	6.05013e-26	Bacteria	Proteobacteria	Gammaproteobacteria	Burkholderiales	Burkholderiaceae	Ralstonia	NA
ASV_1561	4.07962	1.99247	0.570208	3.49428	0.000475348	0.00346223	Bacteria	Proteobacteria	Gammaproteobacteria	Burkholderiales	Nitrosomonadaceae	NA	NA
ASV_1681	6.73872	2.4374	0.539324	4.51937	6.20246e-06	6.05635e-05	Bacteria	Proteobacteria	Gammaproteobacteria	Burkholderiales	Nitrosomonadaceae	NA	NA
ASV_4591	1.7634	1.65344	0.446663	3.70176	0.000214106	0.00165852	Bacteria	Proteobacteria	Gammaproteobacteria	Burkholderiales	Nitrosomonadaceae	Nitrosomonas	NA
ASV_4605	2.42818	2.27302	0.451232	5.03736	4.72003e-07	5.29123e-06	Bacteria	Proteobacteria	Gammaproteobacteria	Burkholderiales	Nitrosomonadaceae	Nitrosomonas	NA
ASV_2696	2.96	2.59991	0.512436	5.07363	3.90292e-07	4.43346e-06	Bacteria	Proteobacteria	Gammaproteobacteria	Burkholderiales	Nitrosomonadaceae	Nitrosomonas	NA
ASV_1832	6.4938	2.93467	0.471114	6.22923	4.68743e-10	6.9965e-09	Bacteria	Proteobacteria	Gammaproteobacteria	Burkholderiales	Nitrosomonadaceae	Nitrosomonas	NA
ASV_3564	3.56179	3.10503	0.529504	5.86404	4.51732e-09	6.20042e-08	Bacteria	Proteobacteria	Gammaproteobacteria	Burkholderiales	Nitrosomonadaceae	Nitrosomonas	NA
ASV_1562	6.85068	3.10503	0.552268	5.62233	1.88395e-08	2.42793e-07	Bacteria	Proteobacteria	Gammaproteobacteria	Burkholderiales	Nitrosomonadaceae	Nitrosomonas	NA
ASV_1237	6.54978	3.15987	0.619326	5.10211	3.35884e-07	3.84099e-06	Bacteria	Proteobacteria	Gammaproteobacteria	Burkholderiales	Nitrosomonadaceae	Nitrosomonas	NA
ASV_1363	5.2972	3.46488	0.549668	6.3036	2.90808e-10	4.42863e-09	Bacteria	Proteobacteria	Gammaproteobacteria	Burkholderiales	Nitrosomonadaceae	Nitrosomonas	NA
ASV_670	12.2808	3.71424	0.59341	6.25916	3.87062e-10	5.82827e-09	Bacteria	Proteobacteria	Gammaproteobacteria	Burkholderiales	Nitrosomonadaceae	Nitrosomonas	NA
ASV_206	27.3747	3.88468	0.477477	8.13584	4.09101e-16	9.26622e-15	Bacteria	Proteobacteria	Gammaproteobacteria	Burkholderiales	Nitrosomonadaceae	Nitrosomonas	NA
ASV_429	17.2981	4.31288	0.45437	9.49201	2.26623e-21	6.90379e-20	Bacteria	Proteobacteria	Gammaproteobacteria	Burkholderiales	Nitrosomonadaceae	Nitrosomonas	NA
ASV_124	51.1667	5.51106	0.392808	14.0299	1.02256e-44	7.44207e-43	Bacteria	Proteobacteria	Gammaproteobacteria	Burkholderiales	Nitrosomonadaceae	Nitrosomonas	NA
ASV_118	56.17	5.82727	0.458039	12.7222	4.45098e-37	2.5875e-35	Bacteria	Proteobacteria	Gammaproteobacteria	Burkholderiales	Nitrosomonadaceae	Nitrosomonas	NA
ASV_109	56.3729	6.74483	0.45521	14.817	1.13811e-49	9.41421e-48	Bacteria	Proteobacteria	Gammaproteobacteria	Burkholderiales	Nitrosomonadaceae	Nitrosomonas	NA
ASV_657	14.3591	2.30378	0.539913	4.26694	1.98169e-05	0.000179413	Bacteria	Proteobacteria	Gammaproteobacteria	Burkholderiales	Nitrosomonadaceae	Nitrosospira	NA
ASV_249	36.9125	2.5597	0.54158	4.72635	2.28594e-06	2.37276e-05	Bacteria	Proteobacteria	Gammaproteobacteria	Cellvibrionales	BD2-7	NA	NA
ASV_3004	3.01598	2.27922	0.55197	4.12925	3.63952e-05	0.00031845	Bacteria	Proteobacteria	Gammaproteobacteria	Cellvibrionales	Halieaceae	Halioglobus	NA
ASV_753	12.4838	3.3159	0.526938	6.29278	3.11831e-10	4.73342e-09	Bacteria	Proteobacteria	Gammaproteobacteria	Cellvibrionales	Halieaceae	Halioglobus	NA
ASV_2360	5.17824	3.3634	0.56324	5.97153	2.35042e-09	3.29118e-08	Bacteria	Proteobacteria	Gammaproteobacteria	Cellvibrionales	Halieaceae	Halioglobus	NA
ASV_1746	6.81569	4.17659	0.533254	7.83226	4.79181e-15	1.01783e-13	Bacteria	Proteobacteria	Gammaproteobacteria	Cellvibrionales	Halieaceae	Halioglobus	NA
ASV_4472	2.30922	1.89885	0.506909	3.74594	0.000179718	0.00141254	Bacteria	Proteobacteria	Gammaproteobacteria	Cellvibrionales	Halieaceae	Marimicrobium	NA
ASV_7437	1.80539	1.75489	0.464521	3.77784	0.000158195	0.00125387	Bacteria	Proteobacteria	Gammaproteobacteria	Cellvibrionales	Spongiibacteraceae	NA	NA
ASV_4515	2.50515	1.94642	0.454001	4.28725	1.80898e-05	0.00016521	Bacteria	Proteobacteria	Gammaproteobacteria	Cellvibrionales	Spongiibacteraceae	NA	NA
ASV_2743	4.07962	2.20294	0.434761	5.06702	4.04096e-07	4.57643e-06	Bacteria	Proteobacteria	Gammaproteobacteria	EPR3968-O8a-Bc78	NA	NA	NA
ASV_488	16.7033	2.40372	0.519426	4.62765	3.69833e-06	3.71953e-05	Bacteria	Proteobacteria	Gammaproteobacteria	EPR3968-O8a-Bc78	NA	NA	NA
ASV_1223	9.19488	2.92679	0.514166	5.6923	1.25339e-08	1.64007e-07	Bacteria	Proteobacteria	Gammaproteobacteria	EPR3968-O8a-Bc78	NA	NA	NA
ASV_213	29.2501	4.5967	0.422699	10.8746	1.52245e-27	6.13456e-26	Bacteria	Proteobacteria	Gammaproteobacteria	EPR3968-O8a-Bc78	NA	NA	NA
ASV_39	94.2161	6.93884	0.388041	17.8817	1.63688e-71	2.25998e-69	Bacteria	Proteobacteria	Gammaproteobacteria	EPR3968-O8a-Bc78	NA	NA	NA
ASV_4151	2.58912	1.92283	0.461637	4.16525	3.11013e-05	0.000274689	Bacteria	Proteobacteria	Gammaproteobacteria	Ga0077536	NA	NA	NA
ASV_5463	2.0713	2.05889	0.461348	4.46278	8.09048e-06	7.78651e-05	Bacteria	Proteobacteria	Gammaproteobacteria	Ga0077536	NA	NA	NA
ASV_3039	3.8347	2.08144	0.483078	4.3087	1.64219e-05	0.000150637	Bacteria	Proteobacteria	Gammaproteobacteria	Ga0077536	NA	NA	NA
ASV_1340	7.59942	2.42066	0.476239	5.08287	3.71769e-07	4.22817e-06	Bacteria	Proteobacteria	Gammaproteobacteria	Ga0077536	NA	NA	NA
ASV_2945	3.56179	3.08037	0.48143	6.39838	1.57035e-10	2.44094e-09	Bacteria	Proteobacteria	Gammaproteobacteria	Ga0077536	NA	NA	NA
ASV_1968	5.93399	3.12211	0.521079	5.99162	2.07756e-09	2.93311e-08	Bacteria	Proteobacteria	Gammaproteobacteria	Ga0077536	NA	NA	NA
ASV_850	10.7903	3.59887	0.40034	8.98953	2.48287e-19	6.80597e-18	Bacteria	Proteobacteria	Gammaproteobacteria	Ga0077536	NA	NA	NA
ASV_937	8.06827	1.70044	0.481551	3.53117	0.000413726	0.00305607	Bacteria	Proteobacteria	Gammaproteobacteria	Gammaproteobacteria_Incertae_Sedis	Unknown_Family	NA	NA
ASV_5954	1.81239	1.71882	0.45672	3.7634	0.000167621	0.00132356	Bacteria	Proteobacteria	Gammaproteobacteria	Gammaproteobacteria_Incertae_Sedis	Unknown_Family	NA	NA
ASV_7548	1.79839	1.74595	0.466983	3.7388	0.000184904	0.00144913	Bacteria	Proteobacteria	Gammaproteobacteria	Gammaproteobacteria_Incertae_Sedis	Unknown_Family	NA	NA
ASV_6484	1.89636	1.74595	0.44775	3.8994	9.64318e-05	0.000791044	Bacteria	Proteobacteria	Gammaproteobacteria	Gammaproteobacteria_Incertae_Sedis	Unknown_Family	NA	NA
ASV_1738	4.7234	1.86625	0.551811	3.38204	0.000719492	0.00503725	Bacteria	Proteobacteria	Gammaproteobacteria	Gammaproteobacteria_Incertae_Sedis	Unknown_Family	NA	NA
ASV_917	8.07526	1.9692	0.49095	4.011	6.04628e-05	0.000512787	Bacteria	Proteobacteria	Gammaproteobacteria	Gammaproteobacteria_Incertae_Sedis	Unknown_Family	NA	NA
ASV_1595	5.17125	2.005	0.471498	4.25241	2.11483e-05	0.000190915	Bacteria	Proteobacteria	Gammaproteobacteria	Gammaproteobacteria_Incertae_Sedis	Unknown_Family	NA	NA
ASV_5259	2.17626	2.02975	0.460684	4.40594	1.05325e-05	9.89341e-05	Bacteria	Proteobacteria	Gammaproteobacteria	Gammaproteobacteria_Incertae_Sedis	Unknown_Family	NA	NA
ASV_4003	2.43517	2.2854	0.485309	4.70917	2.48729e-06	2.56897e-05	Bacteria	Proteobacteria	Gammaproteobacteria	Gammaproteobacteria_Incertae_Sedis	Unknown_Family	NA	NA
ASV_1965	4.96832	2.42626	0.475662	5.10082	3.38188e-07	3.86498e-06	Bacteria	Proteobacteria	Gammaproteobacteria	Gammaproteobacteria_Incertae_Sedis	Unknown_Family	NA	NA
ASV_1347	6.80869	2.44846	0.488464	5.01257	5.37065e-07	5.97421e-06	Bacteria	Proteobacteria	Gammaproteobacteria	Gammaproteobacteria_Incertae_Sedis	Unknown_Family	NA	NA
ASV_660	9.90164	2.56746	0.450605	5.6978	1.21366e-08	1.59141e-07	Bacteria	Proteobacteria	Gammaproteobacteria	Gammaproteobacteria_Incertae_Sedis	Unknown_Family	NA	NA
ASV_391	17.4731	3.60003	0.436334	8.25063	1.57559e-16	3.6615e-15	Bacteria	Proteobacteria	Gammaproteobacteria	Gammaproteobacteria_Incertae_Sedis	Unknown_Family	NA	NA
ASV_258	22.0915	3.7211	0.419271	8.87517	6.98275e-19	1.8704e-17	Bacteria	Proteobacteria	Gammaproteobacteria	Gammaproteobacteria_Incertae_Sedis	Unknown_Family	NA	NA
ASV_380	21.9516	4.58996	0.389498	11.7843	4.7027e-32	2.28172e-30	Bacteria	Proteobacteria	Gammaproteobacteria	Gammaproteobacteria_Incertae_Sedis	Unknown_Family	NA	NA
ASV_2206	4.29654	1.61212	0.448138	3.59739	0.000321431	0.0024278	Bacteria	Proteobacteria	Gammaproteobacteria	JTB23	NA	NA	NA
ASV_5176	1.7564	1.69116	0.477802	3.53946	0.000400949	0.00296987	Bacteria	Proteobacteria	Gammaproteobacteria	JTB23	NA	NA	NA
ASV_496	13.1835	1.79874	0.429017	4.19271	2.75645e-05	0.000245414	Bacteria	Proteobacteria	Gammaproteobacteria	JTB23	NA	NA	NA
ASV_656	15.3458	1.80735	0.473902	3.81377	0.000136864	0.00109637	Bacteria	Proteobacteria	Gammaproteobacteria	JTB23	NA	NA	NA
ASV_944	12.2738	1.89885	0.516088	3.67932	0.00023386	0.00180559	Bacteria	Proteobacteria	Gammaproteobacteria	JTB23	NA	NA	NA
ASV_3793	3.00898	1.91	0.470503	4.0595	4.91786e-05	0.000422042	Bacteria	Proteobacteria	Gammaproteobacteria	JTB23	NA	NA	NA
ASV_1393	6.99063	1.96193	0.512633	3.82717	0.000129625	0.00104239	Bacteria	Proteobacteria	Gammaproteobacteria	JTB23	NA	NA	NA
ASV_1909	4.91233	2.51307	0.487753	5.15233	2.57264e-07	2.97555e-06	Bacteria	Proteobacteria	Gammaproteobacteria	JTB23	NA	NA	NA
ASV_1567	5.98297	2.67242	0.494404	5.40534	6.46848e-08	7.91262e-07	Bacteria	Proteobacteria	Gammaproteobacteria	JTB23	NA	NA	NA
ASV_440	17.9279	2.91886	0.474178	6.15563	7.47793e-10	1.09356e-08	Bacteria	Proteobacteria	Gammaproteobacteria	JTB23	NA	NA	NA
ASV_357	16.0176	3.23522	0.574918	5.62726	1.83096e-08	2.3645e-07	Bacteria	Proteobacteria	Gammaproteobacteria	JTB23	NA	NA	NA
ASV_561	14.4991	3.4865	0.5809	6.00189	1.95035e-09	2.75974e-08	Bacteria	Proteobacteria	Gammaproteobacteria	JTB23	NA	NA	NA
ASV_330	16.9063	3.56478	0.652434	5.46382	4.65999e-08	5.77944e-07	Bacteria	Proteobacteria	Gammaproteobacteria	JTB23	NA	NA	NA
ASV_253	25.3734	3.69671	0.665935	5.55116	2.83788e-08	3.5739e-07	Bacteria	Proteobacteria	Gammaproteobacteria	JTB23	NA	NA	NA
ASV_46	86.0848	3.73094	0.349089	10.6877	1.16265e-26	4.51054e-25	Bacteria	Proteobacteria	Gammaproteobacteria	JTB23	NA	NA	NA
ASV_639	13.6104	3.94251	0.494269	7.97645	1.50596e-15	3.2913e-14	Bacteria	Proteobacteria	Gammaproteobacteria	JTB23	NA	NA	NA
ASV_1336	8.39016	4.13784	0.494103	8.37446	5.54766e-17	1.33208e-15	Bacteria	Proteobacteria	Gammaproteobacteria	JTB23	NA	NA	NA
ASV_515	21.1678	4.63178	0.561308	8.25177	1.56063e-16	3.63122e-15	Bacteria	Proteobacteria	Gammaproteobacteria	JTB23	NA	NA	NA
ASV_70	66.1836	6.28594	0.421955	14.8972	3.43726e-50	2.92042e-48	Bacteria	Proteobacteria	Gammaproteobacteria	JTB23	NA	NA	NA
ASV_1654	5.92699	1.86396	0.507293	3.67432	0.000238484	0.00183827	Bacteria	Proteobacteria	Gammaproteobacteria	KI89A_clade	NA	NA	NA
ASV_1726	6.11593	1.89077	0.523539	3.61152	0.000304411	0.00230946	Bacteria	Proteobacteria	Gammaproteobacteria	KI89A_clade	NA	NA	NA
ASV_5228	2.26723	2.24159	0.494738	4.53085	5.87466e-06	5.75723e-05	Bacteria	Proteobacteria	Gammaproteobacteria	KI89A_clade	NA	NA	NA
ASV_1070	5.50713	2.38658	0.620899	3.84375	0.00012117	0.000982019	Bacteria	Proteobacteria	Gammaproteobacteria	KI89A_clade	NA	NA	NA
ASV_843	10.5244	3.0625	0.509385	6.01214	1.83093e-09	2.59662e-08	Bacteria	Proteobacteria	Gammaproteobacteria	KI89A_clade	NA	NA	NA
ASV_762	12.5817	3.35755	0.491851	6.82635	8.71006e-12	1.47209e-10	Bacteria	Proteobacteria	Gammaproteobacteria	KI89A_clade	NA	NA	NA
ASV_2164	5.22723	3.56985	0.52908	6.74729	1.50633e-11	2.50526e-10	Bacteria	Proteobacteria	Gammaproteobacteria	KI89A_clade	NA	NA	NA
ASV_128	50.082	5.64999	0.420834	13.4257	4.27614e-41	2.87789e-39	Bacteria	Proteobacteria	Gammaproteobacteria	KI89A_clade	NA	NA	NA
ASV_2255	4.61144	1.89077	0.557062	3.39418	0.00068834	0.00486266	Bacteria	Proteobacteria	Gammaproteobacteria	MBAE14	NA	NA	NA
ASV_4866	2.30222	1.91488	0.49579	3.86229	0.000112331	0.000914673	Bacteria	Proteobacteria	Gammaproteobacteria	MBAE14	NA	NA	NA
ASV_1538	7.35451	3.23521	0.641191	5.04563	4.52026e-07	5.08246e-06	Bacteria	Proteobacteria	Gammaproteobacteria	MBAE14	NA	NA	NA
ASV_1734	7.01862	3.30985	0.6465	5.11965	3.0611e-07	3.51119e-06	Bacteria	Proteobacteria	Gammaproteobacteria	MBAE14	NA	NA	NA
ASV_1041	11.6511	3.40372	0.540132	6.30165	2.94497e-10	4.48118e-09	Bacteria	Proteobacteria	Gammaproteobacteria	MBAE14	NA	NA	NA
ASV_311	27.7036	2.32193	0.499932	4.64449	3.40917e-06	3.44903e-05	Bacteria	Proteobacteria	Gammaproteobacteria	MBMPE27	NA	NA	NA
ASV_204	32.532	2.50779	0.496268	5.05331	4.3422e-07	4.88844e-06	Bacteria	Proteobacteria	Gammaproteobacteria	MBMPE27	NA	NA	NA
ASV_238	27.0948	2.86212	0.627518	4.56102	5.09068e-06	5.02564e-05	Bacteria	Proteobacteria	Gammaproteobacteria	MBMPE27	NA	NA	NA
ASV_575	9.53777	3.08037	0.67609	4.55615	5.20987e-06	5.13521e-05	Bacteria	Proteobacteria	Gammaproteobacteria	MBMPE27	NA	NA	NA
ASV_362	24.2958	3.13614	0.473325	6.62576	3.45464e-11	5.60655e-10	Bacteria	Proteobacteria	Gammaproteobacteria	MBMPE27	NA	NA	NA
ASV_2669	4.4295	3.17991	0.54315	5.85457	4.78242e-09	6.54515e-08	Bacteria	Proteobacteria	Gammaproteobacteria	MBMPE27	NA	NA	NA
ASV_786	7.28453	4.04803	0.660477	6.12895	8.84603e-10	1.28761e-08	Bacteria	Proteobacteria	Gammaproteobacteria	MBMPE27	NA	NA	NA
ASV_236	25.4434	5.04166	0.736473	6.84567	7.61168e-12	1.29227e-10	Bacteria	Proteobacteria	Gammaproteobacteria	MBMPE27	NA	NA	NA
ASV_43	87.9532	6.20864	0.449312	13.8181	1.98223e-43	1.40454e-41	Bacteria	Proteobacteria	Gammaproteobacteria	MBMPE27	NA	NA	NA
ASV_1245	5.72406	1.62449	0.526873	3.08327	0.00204741	0.0130364	Bacteria	Proteobacteria	Gammaproteobacteria	NA	NA	NA	NA
ASV_6168	2.0503	1.71882	0.492902	3.48714	0.000488222	0.0035531	Bacteria	Proteobacteria	Gammaproteobacteria	NA	NA	NA	NA
ASV_211	28.7952	1.97643	0.49317	4.00761	6.13365e-05	0.000519962	Bacteria	Proteobacteria	Gammaproteobacteria	NA	NA	NA	NA
ASV_3981	2.84104	2.49185	0.460379	5.41261	6.21133e-08	7.61293e-07	Bacteria	Proteobacteria	Gammaproteobacteria	NA	NA	NA	NA
ASV_1744	3.85569	2.52878	0.495077	5.10785	3.25844e-07	3.73299e-06	Bacteria	Proteobacteria	Gammaproteobacteria	NA	NA	NA	NA
ASV_606	9.1599	3.0625	0.464398	6.59456	4.26532e-11	6.86289e-10	Bacteria	Proteobacteria	Gammaproteobacteria	NA	NA	NA	NA
ASV_1080	10.7624	4.29002	0.646607	6.63466	3.25259e-11	5.29696e-10	Bacteria	Proteobacteria	Gammaproteobacteria	NA	NA	NA	NA
ASV_377	18.5857	4.48516	0.557774	8.04118	8.89795e-16	1.97025e-14	Bacteria	Proteobacteria	Gammaproteobacteria	NA	NA	NA	NA
ASV_105	43.0704	5.69986	0.483096	11.7986	3.96822e-32	1.93035e-30	Bacteria	Proteobacteria	Gammaproteobacteria	NA	NA	NA	NA
ASV_129	61.5231	6.57522	0.601143	10.9379	7.59617e-28	3.10073e-26	Bacteria	Proteobacteria	Gammaproteobacteria	NA	NA	NA	NA
ASV_552	16.3185	1.76377	0.475067	3.71267	0.000205085	0.00159522	Bacteria	Proteobacteria	Gammaproteobacteria	Nitrosococcales	Nitrosococcaceae	AqS1	NA
ASV_7323	1.84038	1.79874	0.476097	3.7781	0.000158031	0.0012531	Bacteria	Proteobacteria	Gammaproteobacteria	Nitrosococcales	Nitrosococcaceae	AqS1	NA
ASV_5452	2.0573	1.9542	0.485704	4.02343	5.73574e-05	0.000487551	Bacteria	Proteobacteria	Gammaproteobacteria	Nitrosococcales	Nitrosococcaceae	AqS1	NA
ASV_5356	2.42818	2.38658	0.486578	4.90482	9.35123e-07	1.00971e-05	Bacteria	Proteobacteria	Gammaproteobacteria	Nitrosococcales	Nitrosococcaceae	AqS1	NA
ASV_4987	2.59612	2.45396	0.51065	4.80555	1.54323e-06	1.62977e-05	Bacteria	Proteobacteria	Gammaproteobacteria	Nitrosococcales	Nitrosococcaceae	AqS1	NA
ASV_579	8.05427	2.52356	0.49013	5.14876	2.62217e-07	3.02435e-06	Bacteria	Proteobacteria	Gammaproteobacteria	Nitrosococcales	Nitrosococcaceae	AqS1	NA
ASV_1322	7.50845	3.42346	0.603593	5.67181	1.413e-08	1.84378e-07	Bacteria	Proteobacteria	Gammaproteobacteria	Nitrosococcales	Nitrosococcaceae	AqS1	NA
ASV_224	29.642	3.47212	0.698483	4.97095	6.66252e-07	7.31164e-06	Bacteria	Proteobacteria	Gammaproteobacteria	Nitrosococcales	Nitrosococcaceae	AqS1	NA
ASV_1930	6.66874	4.15819	0.543479	7.65105	1.99348e-14	4.04229e-13	Bacteria	Proteobacteria	Gammaproteobacteria	Nitrosococcales	Nitrosococcaceae	AqS1	NA
ASV_230	32.35	5.64614	0.422056	13.3777	8.16412e-41	5.45543e-39	Bacteria	Proteobacteria	Gammaproteobacteria	Nitrosococcales	Nitrosococcaceae	AqS1	NA
ASV_365	23.3231	5.70621	0.547361	10.4249	1.90787e-25	7.03812e-24	Bacteria	Proteobacteria	Gammaproteobacteria	Nitrosococcales	Nitrosococcaceae	AqS1	NA
ASV_121	49.0814	6.10476	0.540002	11.3051	1.2385e-29	5.4462e-28	Bacteria	Proteobacteria	Gammaproteobacteria	Nitrosococcales	Nitrosococcaceae	AqS1	NA
ASV_3067	3.11394	2.47573	0.467963	5.29045	1.22018e-07	1.45468e-06	Bacteria	Proteobacteria	Gammaproteobacteria	Nitrosococcales	Nitrosococcaceae	MSB-1D1	NA
ASV_1385	7.27054	3.92679	0.522107	7.52104	5.43404e-14	1.07842e-12	Bacteria	Proteobacteria	Gammaproteobacteria	Oceanospirillales	Kangiellaceae	Aliikangiella	NA
ASV_1103	11.0912	1.63421	0.618377	2.64273	0.00822398	0.0454716	Bacteria	Proteobacteria	Gammaproteobacteria	Oceanospirillales	Kangiellaceae	NA	NA
ASV_3578	2.3722	2	0.457201	4.37444	1.21743e-05	0.000113392	Bacteria	Proteobacteria	Gammaproteobacteria	Oceanospirillales	Kangiellaceae	NA	NA
ASV_634	18.1798	2.16992	0.570358	3.80449	0.000142094	0.00113488	Bacteria	Proteobacteria	Gammaproteobacteria	Oceanospirillales	Kangiellaceae	NA	NA
ASV_4412	2.91801	2.56478	0.513534	4.99438	5.90238e-07	6.53858e-06	Bacteria	Proteobacteria	Gammaproteobacteria	Oceanospirillales	Kangiellaceae	NA	NA
ASV_583	13.1206	2.59467	0.466916	5.55704	2.74391e-08	3.46486e-07	Bacteria	Proteobacteria	Gammaproteobacteria	Oceanospirillales	Kangiellaceae	NA	NA
ASV_2450	4.94033	3.20945	0.582897	5.50603	3.67007e-08	4.58502e-07	Bacteria	Proteobacteria	Gammaproteobacteria	Oceanospirillales	Kangiellaceae	NA	NA
ASV_2002	5.76605	3.38082	0.577205	5.85723	4.70657e-09	6.44604e-08	Bacteria	Proteobacteria	Gammaproteobacteria	Oceanospirillales	Kangiellaceae	NA	NA
ASV_6544	1.83338	1.74595	0.445914	3.91545	9.02373e-05	0.000744457	Bacteria	Proteobacteria	Gammaproteobacteria	Oceanospirillales	Pseudohongiellaceae	Pseudohongiella	NA
ASV_6421	2.0573	2.04439	0.479001	4.26804	1.97198e-05	0.00017862	Bacteria	Proteobacteria	Gammaproteobacteria	pItb-vmat-80	NA	NA	NA
ASV_4664	2.75007	2.62936	0.502397	5.23362	1.66222e-07	1.9593e-06	Bacteria	Proteobacteria	Gammaproteobacteria	pItb-vmat-80	NA	NA	NA
ASV_4089	3.11394	2.86212	0.524696	5.45482	4.90226e-08	6.06788e-07	Bacteria	Proteobacteria	Gammaproteobacteria	pItb-vmat-80	NA	NA	NA
ASV_1894	6.7877	4.18653	0.57351	7.29983	2.88129e-13	5.46629e-12	Bacteria	Proteobacteria	Gammaproteobacteria	pItb-vmat-80	NA	NA	NA
ASV_593	15.6467	4.95322	0.602306	8.22377	1.97204e-16	4.54344e-15	Bacteria	Proteobacteria	Gammaproteobacteria	pItb-vmat-80	NA	NA	NA
ASV_382	22.4974	5.27767	0.537034	9.82744	8.57724e-23	2.76727e-21	Bacteria	Proteobacteria	Gammaproteobacteria	pItb-vmat-80	NA	NA	NA
ASV_3783	2.60312	2.04682	0.472931	4.32795	1.50505e-05	0.000138761	Bacteria	Proteobacteria	Gammaproteobacteria	SS1-B-07-19	NA	NA	NA
ASV_2980	3.56179	2.97346	0.517774	5.74277	9.31416e-09	1.23774e-07	Bacteria	Proteobacteria	Gammaproteobacteria	SS1-B-07-19	NA	NA	NA
ASV_915	11.9869	4.80628	0.574622	8.36424	6.05025e-17	1.44353e-15	Bacteria	Proteobacteria	Gammaproteobacteria	SS1-B-07-19	NA	NA	NA
ASV_7204	1.86837	1.83289	0.476806	3.8441	0.000120995	0.000981395	Bacteria	Proteobacteria	Gammaproteobacteria	SS1-B-09-64	NA	NA	NA
ASV_1089	11.1542	4.87947	0.476039	10.2501	1.18161e-24	4.26676e-23	Bacteria	Proteobacteria	Gammaproteobacteria	SS1-B-09-64	NA	NA	NA
ASV_1818	5.82902	2.47032	0.529776	4.66295	3.11712e-06	3.16722e-05	Bacteria	Proteobacteria	Gammaproteobacteria	Steroidobacterales	Woeseiaceae	NA	NA
ASV_3099	3.74373	1.62449	0.492113	3.30105	0.000963242	0.00657702	Bacteria	Proteobacteria	Gammaproteobacteria	Steroidobacterales	Woeseiaceae	Woeseia	NA
ASV_8037	1.71442	1.63421	0.477905	3.41952	0.000627321	0.00446859	Bacteria	Proteobacteria	Gammaproteobacteria	Steroidobacterales	Woeseiaceae	Woeseia	NA
ASV_1602	5.97597	1.65344	0.56797	2.91114	0.0036011	0.0217211	Bacteria	Proteobacteria	Gammaproteobacteria	Steroidobacterales	Woeseiaceae	Woeseia	NA
ASV_5980	2.16926	1.66296	0.459276	3.62084	0.000293647	0.00223141	Bacteria	Proteobacteria	Gammaproteobacteria	Steroidobacterales	Woeseiaceae	Woeseia	NA
ASV_2689	3.28189	1.67242	0.527716	3.16918	0.00152872	0.0100051	Bacteria	Proteobacteria	Gammaproteobacteria	Steroidobacterales	Woeseiaceae	Woeseia	NA
ASV_6882	1.7844	1.72792	0.436416	3.95934	7.51578e-05	0.000627719	Bacteria	Proteobacteria	Gammaproteobacteria	Steroidobacterales	Woeseiaceae	Woeseia	NA
ASV_556	14.0442	1.73697	0.546578	3.17789	0.0014835	0.00973635	Bacteria	Proteobacteria	Gammaproteobacteria	Steroidobacterales	Woeseiaceae	Woeseia	NA
ASV_885	9.17389	1.74595	0.58365	2.99144	0.00277664	0.0170885	Bacteria	Proteobacteria	Gammaproteobacteria	Steroidobacterales	Woeseiaceae	Woeseia	NA
ASV_1328	8.83101	1.74595	0.48744	3.58188	0.000341129	0.0025601	Bacteria	Proteobacteria	Gammaproteobacteria	Steroidobacterales	Woeseiaceae	Woeseia	NA
ASV_1778	4.99631	1.75489	0.510973	3.43441	0.000593854	0.00424146	Bacteria	Proteobacteria	Gammaproteobacteria	Steroidobacterales	Woeseiaceae	Woeseia	NA
ASV_1420	4.98931	1.76377	0.430206	4.09982	4.13479e-05	0.000358775	Bacteria	Proteobacteria	Gammaproteobacteria	Steroidobacterales	Woeseiaceae	Woeseia	NA
ASV_698	7.12359	1.81592	0.442613	4.10272	4.08325e-05	0.000355124	Bacteria	Proteobacteria	Gammaproteobacteria	Steroidobacterales	Woeseiaceae	Woeseia	NA
ASV_7171	1.87536	1.8413	0.489008	3.76538	0.000166297	0.00131421	Bacteria	Proteobacteria	Gammaproteobacteria	Steroidobacterales	Woeseiaceae	Woeseia	NA
ASV_7089	1.88236	1.84967	0.477467	3.87391	0.000107103	0.000874764	Bacteria	Proteobacteria	Gammaproteobacteria	Steroidobacterales	Woeseiaceae	Woeseia	NA
ASV_1918	5.75905	1.85798	0.510127	3.64219	0.00027033	0.00206761	Bacteria	Proteobacteria	Gammaproteobacteria	Steroidobacterales	Woeseiaceae	Woeseia	NA
ASV_2460	4.07962	1.87173	0.470431	3.97877	6.9274e-05	0.000580695	Bacteria	Proteobacteria	Gammaproteobacteria	Steroidobacterales	Woeseiaceae	Woeseia	NA
ASV_3464	3.35886	1.89885	0.483037	3.93107	8.45669e-05	0.000699521	Bacteria	Proteobacteria	Gammaproteobacteria	Steroidobacterales	Woeseiaceae	Woeseia	NA
ASV_2688	3.86969	1.92283	0.515007	3.73361	0.000188758	0.00147741	Bacteria	Proteobacteria	Gammaproteobacteria	Steroidobacterales	Woeseiaceae	Woeseia	NA
ASV_3684	2.70108	2.01495	0.528409	3.81324	0.000137156	0.00109825	Bacteria	Proteobacteria	Gammaproteobacteria	Steroidobacterales	Woeseiaceae	Woeseia	NA
ASV_1585	6.30486	2.02237	0.42616	4.74555	2.07936e-06	2.16671e-05	Bacteria	Proteobacteria	Gammaproteobacteria	Steroidobacterales	Woeseiaceae	Woeseia	NA
ASV_1021	6.96264	2.02975	0.657526	3.08695	0.00202224	0.0128892	Bacteria	Proteobacteria	Gammaproteobacteria	Steroidobacterales	Woeseiaceae	Woeseia	NA
ASV_427	19.7963	2.05166	0.546046	3.7573	0.000171755	0.00135449	Bacteria	Proteobacteria	Gammaproteobacteria	Steroidobacterales	Woeseiaceae	Woeseia	NA
ASV_1028	9.49578	2.07236	0.419859	4.93584	7.98072e-07	8.69727e-06	Bacteria	Proteobacteria	Gammaproteobacteria	Steroidobacterales	Woeseiaceae	Woeseia	NA
ASV_4170	2.49815	2.07325	0.506977	4.08943	4.32428e-05	0.000374352	Bacteria	Proteobacteria	Gammaproteobacteria	Steroidobacterales	Woeseiaceae	Woeseia	NA
ASV_784	13.2605	2.13614	0.455413	4.69055	2.72469e-06	2.79724e-05	Bacteria	Proteobacteria	Gammaproteobacteria	Steroidobacterales	Woeseiaceae	Woeseia	NA
ASV_704	13.2395	2.2854	0.527132	4.33554	1.45401e-05	0.000134228	Bacteria	Proteobacteria	Gammaproteobacteria	Steroidobacterales	Woeseiaceae	Woeseia	NA
ASV_5484	2.3512	2.30985	0.506018	4.56477	5.0004e-06	4.94431e-05	Bacteria	Proteobacteria	Gammaproteobacteria	Steroidobacterales	Woeseiaceae	Woeseia	NA
ASV_5516	2.3652	2.3339	0.473823	4.92568	8.40674e-07	9.15092e-06	Bacteria	Proteobacteria	Gammaproteobacteria	Steroidobacterales	Woeseiaceae	Woeseia	NA
ASV_1463	6.7947	2.47573	0.596465	4.15068	3.31492e-05	0.000291679	Bacteria	Proteobacteria	Gammaproteobacteria	Steroidobacterales	Woeseiaceae	Woeseia	NA
ASV_506	13.1555	2.49719	0.547771	4.55882	5.1443e-06	5.07325e-05	Bacteria	Proteobacteria	Gammaproteobacteria	Steroidobacterales	Woeseiaceae	Woeseia	NA
ASV_5063	2.56813	2.49719	0.486568	5.13225	2.86301e-07	3.29404e-06	Bacteria	Proteobacteria	Gammaproteobacteria	Steroidobacterales	Woeseiaceae	Woeseia	NA
ASV_459	18.4667	2.55969	0.607518	4.21336	2.51595e-05	0.000225283	Bacteria	Proteobacteria	Gammaproteobacteria	Steroidobacterales	Woeseiaceae	Woeseia	NA
ASV_3027	2.89702	2.57491	0.535047	4.81249	1.49064e-06	1.57688e-05	Bacteria	Proteobacteria	Gammaproteobacteria	Steroidobacterales	Woeseiaceae	Woeseia	NA
ASV_4777	2.69409	2.58496	0.500191	5.16795	2.3668e-07	2.74733e-06	Bacteria	Proteobacteria	Gammaproteobacteria	Steroidobacterales	Woeseiaceae	Woeseia	NA
ASV_4641	2.76406	2.63904	0.509173	5.18299	2.18357e-07	2.54033e-06	Bacteria	Proteobacteria	Gammaproteobacteria	Steroidobacterales	Woeseiaceae	Woeseia	NA
ASV_1114	5.96198	2.69581	0.526523	5.12002	3.055e-07	3.50635e-06	Bacteria	Proteobacteria	Gammaproteobacteria	Steroidobacterales	Woeseiaceae	Woeseia	NA
ASV_463	17.1442	2.75043	0.473289	5.81131	6.19873e-09	8.37966e-08	Bacteria	Proteobacteria	Gammaproteobacteria	Steroidobacterales	Woeseiaceae	Woeseia	NA
ASV_1917	5.18524	2.81592	0.507214	5.55173	2.82854e-08	3.56453e-07	Bacteria	Proteobacteria	Gammaproteobacteria	Steroidobacterales	Woeseiaceae	Woeseia	NA
ASV_2011	5.47215	2.88264	0.487715	5.91051	3.41047e-09	4.71564e-08	Bacteria	Proteobacteria	Gammaproteobacteria	Steroidobacterales	Woeseiaceae	Woeseia	NA
ASV_1064	8.852	2.90689	0.592183	4.90877	9.16491e-07	9.91871e-06	Bacteria	Proteobacteria	Gammaproteobacteria	Steroidobacterales	Woeseiaceae	Woeseia	NA
ASV_484	13.4984	2.98868	0.598906	4.99024	6.03057e-07	6.67263e-06	Bacteria	Proteobacteria	Gammaproteobacteria	Steroidobacterales	Woeseiaceae	Woeseia	NA
ASV_694	10.8673	3.02606	0.538026	5.62438	1.86177e-08	2.40099e-07	Bacteria	Proteobacteria	Gammaproteobacteria	Steroidobacterales	Woeseiaceae	Woeseia	NA
ASV_1856	5.79404	3.04075	0.4812	6.31909	2.63109e-10	4.03628e-09	Bacteria	Proteobacteria	Gammaproteobacteria	Steroidobacterales	Woeseiaceae	Woeseia	NA
ASV_3520	3.49881	3.07325	0.538981	5.70195	1.18442e-08	1.55414e-07	Bacteria	Proteobacteria	Gammaproteobacteria	Steroidobacterales	Woeseiaceae	Woeseia	NA
ASV_3574	3.5548	3.09452	0.519323	5.95875	2.54175e-09	3.55107e-08	Bacteria	Proteobacteria	Gammaproteobacteria	Steroidobacterales	Woeseiaceae	Woeseia	NA
ASV_3227	3.61078	3.12928	0.454832	6.88009	5.98155e-12	1.02571e-10	Bacteria	Proteobacteria	Gammaproteobacteria	Steroidobacterales	Woeseiaceae	Woeseia	NA
ASV_923	9.40481	3.16992	0.491916	6.44403	1.16343e-10	1.82656e-09	Bacteria	Proteobacteria	Gammaproteobacteria	Steroidobacterales	Woeseiaceae	Woeseia	NA
ASV_1628	4.30354	3.24158	0.563708	5.75046	8.89987e-09	1.18772e-07	Bacteria	Proteobacteria	Gammaproteobacteria	Steroidobacterales	Woeseiaceae	Woeseia	NA
ASV_2984	4.26156	3.41785	0.525955	6.49837	8.11927e-11	1.2833e-09	Bacteria	Proteobacteria	Gammaproteobacteria	Steroidobacterales	Woeseiaceae	Woeseia	NA
ASV_385	15.6607	3.52878	0.548848	6.42943	1.28086e-10	2.00589e-09	Bacteria	Proteobacteria	Gammaproteobacteria	Steroidobacterales	Woeseiaceae	Woeseia	NA
ASV_2716	4.68141	3.57743	0.556838	6.42454	1.32272e-10	2.068e-09	Bacteria	Proteobacteria	Gammaproteobacteria	Steroidobacterales	Woeseiaceae	Woeseia	NA
ASV_1141	8.859	3.72338	0.498571	7.46809	8.13658e-14	1.59812e-12	Bacteria	Proteobacteria	Gammaproteobacteria	Steroidobacterales	Woeseiaceae	Woeseia	NA
ASV_185	31.5033	3.77698	0.518105	7.28999	3.09978e-13	5.86739e-12	Bacteria	Proteobacteria	Gammaproteobacteria	Steroidobacterales	Woeseiaceae	Woeseia	NA
ASV_2297	5.53512	3.85591	0.535929	7.19481	6.25488e-13	1.1492e-11	Bacteria	Proteobacteria	Gammaproteobacteria	Steroidobacterales	Woeseiaceae	Woeseia	NA
ASV_2231	5.75905	3.92085	0.575428	6.81379	9.50579e-12	1.60369e-10	Bacteria	Proteobacteria	Gammaproteobacteria	Steroidobacterales	Woeseiaceae	Woeseia	NA
ASV_328	21.0978	3.96847	0.395228	10.041	1.00686e-23	3.39421e-22	Bacteria	Proteobacteria	Gammaproteobacteria	Steroidobacterales	Woeseiaceae	Woeseia	NA
ASV_416	18.9566	4.00375	0.411331	9.73365	2.1667e-22	6.86072e-21	Bacteria	Proteobacteria	Gammaproteobacteria	Steroidobacterales	Woeseiaceae	Woeseia	NA
ASV_1085	8.29919	4.08392	0.574958	7.10299	1.22087e-12	2.19161e-11	Bacteria	Proteobacteria	Gammaproteobacteria	Steroidobacterales	Woeseiaceae	Woeseia	NA
ASV_1642	6.87867	4.18322	0.521338	8.024	1.02354e-15	2.26106e-14	Bacteria	Proteobacteria	Gammaproteobacteria	Steroidobacterales	Woeseiaceae	Woeseia	NA
ASV_1490	7.01862	4.23042	0.477896	8.85217	8.58302e-19	2.26991e-17	Bacteria	Proteobacteria	Gammaproteobacteria	Steroidobacterales	Woeseiaceae	Woeseia	NA
ASV_1343	8.83101	4.29002	0.589615	7.27597	3.43946e-13	6.49727e-12	Bacteria	Proteobacteria	Gammaproteobacteria	Steroidobacterales	Woeseiaceae	Woeseia	NA
ASV_685	12.0709	4.44984	0.483656	9.20041	3.56591e-20	1.02381e-18	Bacteria	Proteobacteria	Gammaproteobacteria	Steroidobacterales	Woeseiaceae	Woeseia	NA
ASV_587	12.7847	4.6736	0.501121	9.32629	1.0964e-20	3.24207e-19	Bacteria	Proteobacteria	Gammaproteobacteria	Steroidobacterales	Woeseiaceae	Woeseia	NA
ASV_1023	12.0009	4.73245	0.677524	6.98492	2.8502e-12	4.98307e-11	Bacteria	Proteobacteria	Gammaproteobacteria	Steroidobacterales	Woeseiaceae	Woeseia	NA
ASV_1248	9.84566	4.77149	0.595772	8.00892	1.15723e-15	2.54739e-14	Bacteria	Proteobacteria	Gammaproteobacteria	Steroidobacterales	Woeseiaceae	Woeseia	NA
ASV_599	17.2282	4.87036	0.455809	10.6851	1.19519e-26	4.62722e-25	Bacteria	Proteobacteria	Gammaproteobacteria	Steroidobacterales	Woeseiaceae	Woeseia	NA
ASV_881	11.91	4.87754	0.544779	8.95324	3.45202e-19	9.40763e-18	Bacteria	Proteobacteria	Gammaproteobacteria	Steroidobacterales	Woeseiaceae	Woeseia	NA
ASV_1153	11.0003	4.94251	0.591703	8.35303	6.65318e-17	1.57935e-15	Bacteria	Proteobacteria	Gammaproteobacteria	Steroidobacterales	Woeseiaceae	Woeseia	NA
ASV_953	11.5461	4.95903	0.509617	9.7309	2.22614e-22	7.02523e-21	Bacteria	Proteobacteria	Gammaproteobacteria	Steroidobacterales	Woeseiaceae	Woeseia	NA
ASV_1057	12.0709	5.08481	0.578672	8.78702	1.53575e-18	4.01627e-17	Bacteria	Proteobacteria	Gammaproteobacteria	Steroidobacterales	Woeseiaceae	Woeseia	NA
ASV_308	32.7419	5.09978	0.501307	10.173	2.61761e-24	9.16992e-23	Bacteria	Proteobacteria	Gammaproteobacteria	Steroidobacterales	Woeseiaceae	Woeseia	NA
ASV_534	18.6557	5.11807	0.507236	10.0901	6.10959e-24	2.08961e-22	Bacteria	Proteobacteria	Gammaproteobacteria	Steroidobacterales	Woeseiaceae	Woeseia	NA
ASV_972	12.6587	5.15734	0.597104	8.63726	5.75761e-18	1.46095e-16	Bacteria	Proteobacteria	Gammaproteobacteria	Steroidobacterales	Woeseiaceae	Woeseia	NA
ASV_969	12.8546	5.17076	0.46352	11.1554	6.73795e-29	2.86241e-27	Bacteria	Proteobacteria	Gammaproteobacteria	Steroidobacterales	Woeseiaceae	Woeseia	NA
ASV_678	14.4151	5.24872	0.554365	9.46797	2.85332e-21	8.64141e-20	Bacteria	Proteobacteria	Gammaproteobacteria	Steroidobacterales	Woeseiaceae	Woeseia	NA
ASV_612	17.9629	5.26912	0.633709	8.31474	9.19523e-17	2.16908e-15	Bacteria	Proteobacteria	Gammaproteobacteria	Steroidobacterales	Woeseiaceae	Woeseia	NA
ASV_90	63.4965	5.42417	0.448861	12.0843	1.27887e-33	6.76431e-32	Bacteria	Proteobacteria	Gammaproteobacteria	Steroidobacterales	Woeseiaceae	Woeseia	NA
ASV_635	17.837	5.44018	0.460385	11.8166	3.20464e-32	1.56295e-30	Bacteria	Proteobacteria	Gammaproteobacteria	Steroidobacterales	Woeseiaceae	Woeseia	NA
ASV_77	66.3795	5.44448	0.411621	13.2269	6.13543e-40	4.05651e-38	Bacteria	Proteobacteria	Gammaproteobacteria	Steroidobacterales	Woeseiaceae	Woeseia	NA
ASV_511	15.5907	5.46964	0.456812	11.9735	4.89144e-33	2.50947e-31	Bacteria	Proteobacteria	Gammaproteobacteria	Steroidobacterales	Woeseiaceae	Woeseia	NA
ASV_419	26.1012	5.60301	0.519677	10.7817	4.19999e-27	1.66028e-25	Bacteria	Proteobacteria	Gammaproteobacteria	Steroidobacterales	Woeseiaceae	Woeseia	NA
ASV_223	29.9219	5.7368	0.437883	13.1012	3.23951e-39	2.06899e-37	Bacteria	Proteobacteria	Gammaproteobacteria	Steroidobacterales	Woeseiaceae	Woeseia	NA
ASV_260	27.1858	5.78354	0.578145	10.0036	1.46933e-23	4.9092e-22	Bacteria	Proteobacteria	Gammaproteobacteria	Steroidobacterales	Woeseiaceae	Woeseia	NA
ASV_199	37.0804	5.94642	0.587802	10.1164	4.67494e-24	1.61067e-22	Bacteria	Proteobacteria	Gammaproteobacteria	Steroidobacterales	Woeseiaceae	Woeseia	NA
ASV_27	114.103	6.00035	0.348928	17.1965	2.81975e-66	3.55345e-64	Bacteria	Proteobacteria	Gammaproteobacteria	Steroidobacterales	Woeseiaceae	Woeseia	NA
ASV_197	35.289	6.04166	0.418644	14.4315	3.2792e-47	2.52351e-45	Bacteria	Proteobacteria	Gammaproteobacteria	Steroidobacterales	Woeseiaceae	Woeseia	NA
ASV_502	23.3231	6.07548	0.509043	11.9351	7.76725e-33	3.93115e-31	Bacteria	Proteobacteria	Gammaproteobacteria	Steroidobacterales	Woeseiaceae	Woeseia	NA
ASV_175	43.9101	6.34429	0.501267	12.6565	1.02959e-36	5.87618e-35	Bacteria	Proteobacteria	Gammaproteobacteria	Steroidobacterales	Woeseiaceae	Woeseia	NA
ASV_16	140.309	6.43792	0.320664	20.0768	1.17674e-89	2.32585e-87	Bacteria	Proteobacteria	Gammaproteobacteria	Steroidobacterales	Woeseiaceae	Woeseia	NA
ASV_40	98.5336	6.65374	0.404196	16.4617	6.918e-61	7.64113e-59	Bacteria	Proteobacteria	Gammaproteobacteria	Steroidobacterales	Woeseiaceae	Woeseia	NA
ASV_97	63.6784	6.94812	0.562825	12.3451	5.17807e-35	2.82642e-33	Bacteria	Proteobacteria	Gammaproteobacteria	Steroidobacterales	Woeseiaceae	Woeseia	NA
ASV_44	86.3857	6.9799	0.41447	16.8405	1.23097e-63	1.43565e-61	Bacteria	Proteobacteria	Gammaproteobacteria	Steroidobacterales	Woeseiaceae	Woeseia	NA
ASV_56	91.9698	7.05957	0.424535	16.6289	4.30132e-62	4.92475e-60	Bacteria	Proteobacteria	Gammaproteobacteria	Steroidobacterales	Woeseiaceae	Woeseia	NA
ASV_28	134.921	7.14508	0.398077	17.949	4.88656e-72	6.84738e-70	Bacteria	Proteobacteria	Gammaproteobacteria	Steroidobacterales	Woeseiaceae	Woeseia	NA
ASV_8	188.6	7.35768	0.371179	19.8225	1.905e-87	3.68764e-85	Bacteria	Proteobacteria	Gammaproteobacteria	Steroidobacterales	Woeseiaceae	Woeseia	NA
ASV_1288	9.66372	4.74259	0.550049	8.62213	6.57222e-18	1.66541e-16	Bacteria	Proteobacteria	Gammaproteobacteria	SZB50	NA	NA	NA
ASV_2129	4.58345	2.90689	0.532808	5.45579	4.87548e-08	6.03871e-07	Bacteria	Proteobacteria	Gammaproteobacteria	UBA4486	NA	NA	NA
ASV_1003	8.82401	3.75223	0.546519	6.8657	6.61681e-12	1.13052e-10	Bacteria	Proteobacteria	Gammaproteobacteria	UBA4486	NA	NA	NA
ASV_1357	7.34051	4.12412	0.571381	7.21781	5.28306e-13	9.77339e-12	Bacteria	Proteobacteria	Gammaproteobacteria	UBA4486	NA	NA	NA
ASV_696	11.875	4.33884	0.505231	8.58782	8.86349e-18	2.22797e-16	Bacteria	Proteobacteria	Gammaproteobacteria	UBA4486	NA	NA	NA
ASV_988	11.868	5.05889	0.583407	8.67128	4.27273e-18	1.09007e-16	Bacteria	Proteobacteria	Gammaproteobacteria	UBA4486	NA	NA	NA
ASV_5059	1.88936	1.64386	0.484903	3.39007	0.000698747	0.00491216	Bacteria	SAR324_clade(Marine_group_B)	NA	NA	NA	NA	NA
ASV_6064	1.74941	1.68182	0.476108	3.53244	0.000411747	0.00304265	Bacteria	SAR324_clade(Marine_group_B)	NA	NA	NA	NA	NA
ASV_5739	1.88936	1.70044	0.473537	3.59093	0.000329502	0.00248177	Bacteria	SAR324_clade(Marine_group_B)	NA	NA	NA	NA	NA
ASV_5700	2.02931	1.70044	0.459251	3.70264	0.000213369	0.00165419	Bacteria	SAR324_clade(Marine_group_B)	NA	NA	NA	NA	NA
ASV_2627	4.38052	1.70966	0.614432	2.7825	0.00539418	0.031242	Bacteria	SAR324_clade(Marine_group_B)	NA	NA	NA	NA	NA
ASV_2030	4.69541	1.70966	0.597924	2.85932	0.00424544	0.0250524	Bacteria	SAR324_clade(Marine_group_B)	NA	NA	NA	NA	NA
ASV_4163	2.0713	1.79008	0.426531	4.19683	2.7068e-05	0.000241337	Bacteria	SAR324_clade(Marine_group_B)	NA	NA	NA	NA	NA
ASV_7137	1.88236	1.84967	0.44909	4.11869	3.81025e-05	0.000332304	Bacteria	SAR324_clade(Marine_group_B)	NA	NA	NA	NA	NA
ASV_5274	2.00132	1.86625	0.459312	4.06314	4.84176e-05	0.00041639	Bacteria	SAR324_clade(Marine_group_B)	NA	NA	NA	NA	NA
ASV_3579	2.02931	2.01495	0.476538	4.22831	2.35452e-05	0.000211637	Bacteria	SAR324_clade(Marine_group_B)	NA	NA	NA	NA	NA
ASV_6151	2.14127	2.05889	0.462044	4.45605	8.34824e-06	8.00996e-05	Bacteria	SAR324_clade(Marine_group_B)	NA	NA	NA	NA	NA
ASV_5002	2.22525	2.20945	0.470321	4.69775	2.6304e-06	2.70932e-05	Bacteria	SAR324_clade(Marine_group_B)	NA	NA	NA	NA	NA
ASV_3980	2.30922	2.22882	0.506101	4.4039	1.06324e-05	9.96229e-05	Bacteria	SAR324_clade(Marine_group_B)	NA	NA	NA	NA	NA
ASV_2314	2.3652	2.26679	0.515722	4.39536	1.10589e-05	0.000103464	Bacteria	SAR324_clade(Marine_group_B)	NA	NA	NA	NA	NA
ASV_1847	2.28822	2.26679	0.505751	4.48202	7.39403e-06	7.14554e-05	Bacteria	SAR324_clade(Marine_group_B)	NA	NA	NA	NA	NA
ASV_4263	2.50515	2.4374	0.495071	4.92334	8.50791e-07	9.25568e-06	Bacteria	SAR324_clade(Marine_group_B)	NA	NA	NA	NA	NA
ASV_2417	4.14959	2.46489	0.589474	4.1815	2.89593e-05	0.000257344	Bacteria	SAR324_clade(Marine_group_B)	NA	NA	NA	NA	NA
ASV_2851	4.38052	2.46489	0.486732	5.06415	4.10223e-07	4.63795e-06	Bacteria	SAR324_clade(Marine_group_B)	NA	NA	NA	NA	NA
ASV_3385	2.68709	2.58496	0.539061	4.79531	1.62425e-06	1.71052e-05	Bacteria	SAR324_clade(Marine_group_B)	NA	NA	NA	NA	NA
ASV_4315	2.97399	2.64866	0.492998	5.37255	7.76326e-08	9.4228e-07	Bacteria	SAR324_clade(Marine_group_B)	NA	NA	NA	NA	NA
ASV_4327	2.96699	2.69581	0.523584	5.14876	2.62217e-07	3.02435e-06	Bacteria	SAR324_clade(Marine_group_B)	NA	NA	NA	NA	NA
ASV_1880	5.77304	2.71882	0.507397	5.35837	8.3978e-08	1.01536e-06	Bacteria	SAR324_clade(Marine_group_B)	NA	NA	NA	NA	NA
ASV_2542	4.51347	2.90689	0.56955	5.10383	3.32843e-07	3.80853e-06	Bacteria	SAR324_clade(Marine_group_B)	NA	NA	NA	NA	NA
ASV_2952	3.70874	3.10852	0.504823	6.15765	7.38324e-10	1.08055e-08	Bacteria	SAR324_clade(Marine_group_B)	NA	NA	NA	NA	NA
ASV_1109	7.77436	3.12239	0.661696	4.71878	2.37268e-06	2.45896e-05	Bacteria	SAR324_clade(Marine_group_B)	NA	NA	NA	NA	NA
ASV_2441	4.28255	3.14636	0.492158	6.39298	1.62686e-10	2.52668e-09	Bacteria	SAR324_clade(Marine_group_B)	NA	NA	NA	NA	NA
ASV_2645	3.67375	3.15987	0.536915	5.88524	3.97486e-09	5.45984e-08	Bacteria	SAR324_clade(Marine_group_B)	NA	NA	NA	NA	NA
ASV_1845	6.84368	3.26053	0.624138	5.22404	1.75058e-07	2.05956e-06	Bacteria	SAR324_clade(Marine_group_B)	NA	NA	NA	NA	NA
ASV_2495	4.50647	3.2854	0.595302	5.51888	3.41172e-08	4.27364e-07	Bacteria	SAR324_clade(Marine_group_B)	NA	NA	NA	NA	NA
ASV_2972	4.10761	3.35167	0.541982	6.1841	6.24566e-10	9.21247e-09	Bacteria	SAR324_clade(Marine_group_B)	NA	NA	NA	NA	NA
ASV_2983	4.26156	3.41222	0.508412	6.71151	1.92619e-11	3.18942e-10	Bacteria	SAR324_clade(Marine_group_B)	NA	NA	NA	NA	NA
ASV_2451	5.09427	3.60979	0.526012	6.86257	6.7631e-12	1.15446e-10	Bacteria	SAR324_clade(Marine_group_B)	NA	NA	NA	NA	NA
ASV_2483	5.12226	3.72792	0.572277	6.51418	7.30865e-11	1.16104e-09	Bacteria	SAR324_clade(Marine_group_B)	NA	NA	NA	NA	NA
ASV_2463	5.16425	3.74147	0.574617	6.51123	7.45363e-11	1.18207e-09	Bacteria	SAR324_clade(Marine_group_B)	NA	NA	NA	NA	NA
ASV_2313	5.33919	3.75711	0.525855	7.14477	9.01485e-13	1.64182e-11	Bacteria	SAR324_clade(Marine_group_B)	NA	NA	NA	NA	NA
ASV_2426	5.24122	3.76598	0.541279	6.95754	3.46256e-12	6.02563e-11	Bacteria	SAR324_clade(Marine_group_B)	NA	NA	NA	NA	NA
ASV_1405	5.47215	3.8371	0.598901	6.4069	1.48509e-10	2.31416e-09	Bacteria	SAR324_clade(Marine_group_B)	NA	NA	NA	NA	NA
ASV_1763	5.99697	3.86418	0.542589	7.12176	1.06558e-12	1.92725e-11	Bacteria	SAR324_clade(Marine_group_B)	NA	NA	NA	NA	NA
ASV_1984	6.50779	4.11894	0.568596	7.24405	4.35474e-13	8.12812e-12	Bacteria	SAR324_clade(Marine_group_B)	NA	NA	NA	NA	NA
ASV_761	12.8406	4.3502	0.567889	7.6603	1.85505e-14	3.77791e-13	Bacteria	SAR324_clade(Marine_group_B)	NA	NA	NA	NA	NA
ASV_446	20.65	4.54818	0.540969	8.40746	4.18976e-17	1.0138e-15	Bacteria	SAR324_clade(Marine_group_B)	NA	NA	NA	NA	NA
ASV_1171	9.34183	4.55714	0.604747	7.53562	4.8602e-14	9.67762e-13	Bacteria	SAR324_clade(Marine_group_B)	NA	NA	NA	NA	NA
ASV_279	25.5483	4.57869	0.448531	10.2082	1.82253e-24	6.49367e-23	Bacteria	SAR324_clade(Marine_group_B)	NA	NA	NA	NA	NA
ASV_836	13.4844	4.78245	0.62403	7.66381	1.80493e-14	3.67982e-13	Bacteria	SAR324_clade(Marine_group_B)	NA	NA	NA	NA	NA
ASV_931	13.6874	5.27535	0.572722	9.211	3.23097e-20	9.29063e-19	Bacteria	SAR324_clade(Marine_group_B)	NA	NA	NA	NA	NA
ASV_723	14.0652	5.29462	0.521052	10.1614	2.94795e-24	1.02507e-22	Bacteria	SAR324_clade(Marine_group_B)	NA	NA	NA	NA	NA
ASV_644	17.844	5.44225	0.603933	9.01134	2.03554e-19	5.62907e-18	Bacteria	SAR324_clade(Marine_group_B)	NA	NA	NA	NA	NA
ASV_469	20.3141	5.84444	0.556167	10.5084	7.89979e-26	2.94899e-24	Bacteria	SAR324_clade(Marine_group_B)	NA	NA	NA	NA	NA
ASV_471	17.4381	2.57994	0.526143	4.9035	9.41418e-07	1.01534e-05	Bacteria	Schekmanbacteria	NA	NA	NA	NA	NA
ASV_111	40.3273	3.37351	0.492998	6.84286	7.76287e-12	1.31674e-10	Bacteria	Schekmanbacteria	NA	NA	NA	NA	NA
ASV_7729	1.7564	1.66296	0.460184	3.61369	0.000301868	0.0022911	Bacteria	Sumerlaeota	Sumerlaeia	NA	NA	NA	NA
ASV_3444	2.57513	2.42066	0.503869	4.80415	1.55413e-06	1.63851e-05	Bacteria	Sumerlaeota	Sumerlaeia	NA	NA	NA	NA
ASV_3217	2.67309	2.51832	0.52542	4.79297	1.64327e-06	1.72957e-05	Bacteria	Verrucomicrobiota	Kiritimatiellae	WCHB1-41	NA	NA	NA
ASV_1898	6.64775	4.15144	0.553518	7.5001	6.3771e-14	1.25648e-12	Bacteria	Verrucomicrobiota	Kiritimatiellae	WCHB1-41	NA	NA	NA
ASV_7761	1.73541	1.59495	0.422821	3.77216	0.000161843	0.00128063	Bacteria	Verrucomicrobiota	Lentisphaeria	Victivallales	Arctic95B-14	NA	NA
ASV_4861	2.11328	1.66296	0.454814	3.65637	0.000255817	0.00196461	Bacteria	Verrucomicrobiota	Lentisphaeria	Victivallales	Arctic95B-14	NA	NA
ASV_3311	3.41484	1.86625	0.496343	3.76	0.000169915	0.00134111	Bacteria	Verrucomicrobiota	Lentisphaeria	Victivallales	Arctic95B-14	NA	NA
ASV_910	8.86599	2.64386	0.533098	4.95942	7.07036e-07	7.74563e-06	Bacteria	Verrucomicrobiota	Lentisphaeria	Victivallales	Arctic95B-14	NA	NA
ASV_1852	5.67508	2.23522	0.507921	4.40071	1.07896e-05	0.000101046	Bacteria	Verrucomicrobiota	Omnitrophia	Omnitrophales	koll11	NA	NA
ASV_1844	4.91233	2.63904	0.521863	5.05696	4.26001e-07	4.80422e-06	Bacteria	Verrucomicrobiota	Omnitrophia	Omnitrophales	koll11	NA	NA
ASV_1786	5.37418	2.82018	0.531873	5.30235	1.14322e-07	1.36903e-06	Bacteria	Verrucomicrobiota	Omnitrophia	Omnitrophales	koll11	NA	NA
ASV_1106	8.94297	2.87057	0.481717	5.95904	2.53722e-09	3.54738e-08	Bacteria	Verrucomicrobiota	Omnitrophia	Omnitrophales	koll11	NA	NA
ASV_507	17.1022	3.70077	0.417574	8.86254	7.82085e-19	2.08597e-17	Bacteria	Verrucomicrobiota	Omnitrophia	Omnitrophales	koll11	NA	NA
ASV_490	18.7956	4.5025	0.42732	10.5366	5.85785e-26	2.19986e-24	Bacteria	Verrucomicrobiota	Omnitrophia	Omnitrophales	koll11	NA	NA
ASV_1544	6.10193	1.91488	0.483364	3.96158	7.44561e-05	0.000622468	Bacteria	Verrucomicrobiota	Omnitrophia	Omnitrophales	Omnitrophaceae	Candidatus_Omnitrophus	NA
ASV_5605	2.28822	2.10154	0.44737	4.69754	2.63318e-06	2.71071e-05	Bacteria	Verrucomicrobiota	Omnitrophia	Omnitrophales	Omnitrophaceae	Candidatus_Omnitrophus	NA
ASV_4022	2.60312	2.24793	0.476613	4.71646	2.39981e-06	2.48408e-05	Bacteria	Verrucomicrobiota	Omnitrophia	Omnitrophales	Omnitrophaceae	Candidatus_Omnitrophus	NA
ASV_3329	2.81305	2.26679	0.491859	4.60861	4.05369e-06	4.05736e-05	Bacteria	Verrucomicrobiota	Omnitrophia	Omnitrophales	Omnitrophaceae	Candidatus_Omnitrophus	NA
ASV_4372	2.42818	2.32793	0.492382	4.72789	2.26869e-06	2.35615e-05	Bacteria	Verrucomicrobiota	Omnitrophia	Omnitrophales	Omnitrophaceae	Candidatus_Omnitrophus	NA
ASV_1784	5.38817	2.33985	0.50558	4.62805	3.6913e-06	3.71445e-05	Bacteria	Verrucomicrobiota	Verrucomicrobiae	Opitutales	Puniceicoccaceae	Pelagicoccus	NA
ASV_4152	2.42818	1.63421	0.473803	3.44912	0.00056241	0.0040353	Bacteria	Verrucomicrobiota	Verrucomicrobiae	Verrucomicrobiales	DEV007	NA	NA
ASV_3069	3.38685	1.6545	0.49666	3.33126	0.000864543	0.00597627	Bacteria	Verrucomicrobiota	Verrucomicrobiae	Verrucomicrobiales	DEV007	NA	NA
ASV_4832	2.28123	1.89077	0.463653	4.07798	4.54282e-05	0.000391826	Bacteria	Verrucomicrobiota	Verrucomicrobiae	Verrucomicrobiales	DEV007	NA	NA
ASV_246	27.4377	1.61471	0.460743	3.50458	0.000457334	0.00334269	Bacteria	Zixibacteria	NA	NA	NA	NA	NA
ASV_1822	5.38118	1.70044	0.466428	3.64566	0.000266702	0.00204272	Bacteria	Zixibacteria	NA	NA	NA	NA	NA
ASV_746	12.7427	2.49748	0.463891	5.38377	7.29431e-08	8.89384e-07	Bacteria	Zixibacteria	NA	NA	NA	NA	NA
Enriched in bottom water
	baseMean	log2FoldChange	lfcSE	stat	pvalue	padj	Kingdom	Phylum	Class	Order	Family	Genus	Species
ASV_703	6.31886	-5.51245	0.272722	-20.2127	7.57e-91	1.56e-88	Archaea	Crenarchaeota	Nitrososphaeria	Marine_Benthic_Group_A	NA	NA	NA
ASV_2229	1.91735	-3.11221	0.306269	-10.1617	2.94e-24	1.02e-22	Archaea	Crenarchaeota	Nitrososphaeria	Marine_Benthic_Group_A	NA	NA	NA
ASV_5705	1.30856	-1.81943	0.300526	-6.05415	1.41e-09	2.02e-08	Archaea	Crenarchaeota	Nitrososphaeria	NA	NA	NA	NA
ASV_866	10.9653	-1.73986	0.290519	-5.9888	2.11e-09	2.98e-08	Archaea	Crenarchaeota	Nitrososphaeria	NA	NA	NA	NA
ASV_2186	3.89068	-4.46713	0.265205	-16.844	1.16e-63	1.36e-61	Archaea	Crenarchaeota	Nitrososphaeria	Nitrosopumilales	Nitrosopumilaceae	Candidatus_Nitrosopumilus	NA
ASV_310	19.5514	-3.89349	0.238091	-16.353	4.14e-60	4.52e-58	Archaea	Crenarchaeota	Nitrososphaeria	Nitrosopumilales	Nitrosopumilaceae	Candidatus_Nitrosopumilus	NA
ASV_1596	5.42316	-2.30736	0.420649	-5.48523	4.13e-08	5.13e-07	Archaea	Crenarchaeota	Nitrososphaeria	Nitrosopumilales	Nitrosopumilaceae	Candidatus_Nitrosopumilus	NA
ASV_64	67.87	-1.61163	0.44402	-3.62964	0.00028382	0.0021655	Archaea	Crenarchaeota	Nitrososphaeria	Nitrosopumilales	Nitrosopumilaceae	Candidatus_Nitrosopumilus	NA
ASV_4	207.606	-10.5659	0.223203	-47.3378	0	0	Archaea	Crenarchaeota	Nitrososphaeria	Nitrosopumilales	Nitrosopumilaceae	NA	NA
ASV_19	100.017	-9.67273	0.228129	-42.4003	0	0	Archaea	Crenarchaeota	Nitrososphaeria	Nitrosopumilales	Nitrosopumilaceae	NA	NA
ASV_26	85.637	-9.38827	0.229428	-40.9202	0	0	Archaea	Crenarchaeota	Nitrososphaeria	Nitrosopumilales	Nitrosopumilaceae	NA	NA
ASV_76	38.487	-8.30405	0.235057	-35.3279	2.19e-273	5.88e-270	Archaea	Crenarchaeota	Nitrososphaeria	Nitrosopumilales	Nitrosopumilaceae	NA	NA
ASV_87	32.0491	-8.0331	0.250489	-32.0697	1.17e-225	1.37e-222	Archaea	Crenarchaeota	Nitrososphaeria	Nitrosopumilales	Nitrosopumilaceae	NA	NA
ASV_156	24.2118	-7.61471	0.255841	-29.7635	1.16e-194	9.47e-192	Archaea	Crenarchaeota	Nitrososphaeria	Nitrosopumilales	Nitrosopumilaceae	NA	NA
ASV_268	20.0972	-7.33355	0.246073	-29.8023	3.64e-195	3.11e-192	Archaea	Crenarchaeota	Nitrososphaeria	Nitrosopumilales	Nitrosopumilaceae	NA	NA
ASV_231	17.1232	-7.06208	0.248538	-28.4144	1.34e-177	8.68e-175	Archaea	Crenarchaeota	Nitrososphaeria	Nitrosopumilales	Nitrosopumilaceae	NA	NA
ASV_226	15.3878	-6.92934	0.250401	-27.673	1.48e-168	7.91e-166	Archaea	Crenarchaeota	Nitrososphaeria	Nitrosopumilales	Nitrosopumilaceae	NA	NA
ASV_141	14.2052	-6.8066	0.369438	-18.4242	8.4e-76	1.27e-73	Archaea	Crenarchaeota	Nitrososphaeria	Nitrosopumilales	Nitrosopumilaceae	NA	NA
ASV_516	13.4634	-6.72391	0.240882	-27.9137	1.82e-171	1.12e-168	Archaea	Crenarchaeota	Nitrososphaeria	Nitrosopumilales	Nitrosopumilaceae	NA	NA
ASV_533	10.7204	-6.36889	0.246605	-25.8263	4.5e-147	1.8e-144	Archaea	Crenarchaeota	Nitrososphaeria	Nitrosopumilales	Nitrosopumilaceae	NA	NA
ASV_560	9.21588	-6.12928	0.276377	-22.1773	5.69e-109	1.57e-106	Archaea	Crenarchaeota	Nitrososphaeria	Nitrosopumilales	Nitrosopumilaceae	NA	NA
ASV_485	6.66874	-5.60253	0.313997	-17.8426	3.3e-71	4.52e-69	Archaea	Crenarchaeota	Nitrososphaeria	Nitrosopumilales	Nitrosopumilaceae	NA	NA
ASV_1332	6.39583	-5.53276	0.26805	-20.6407	1.18e-94	2.58e-92	Archaea	Crenarchaeota	Nitrososphaeria	Nitrosopumilales	Nitrosopumilaceae	NA	NA
ASV_512	5.913	-5.40038	0.406967	-13.2698	3.46e-40	2.3e-38	Archaea	Crenarchaeota	Nitrososphaeria	Nitrosopumilales	Nitrosopumilaceae	NA	NA
ASV_976	5.85002	-5.38218	0.255787	-21.0416	2.73e-98	6.65e-96	Archaea	Crenarchaeota	Nitrososphaeria	Nitrosopumilales	Nitrosopumilaceae	NA	NA
ASV_524	5.37418	-5.23672	0.342206	-15.3028	7.32e-53	6.64e-51	Archaea	Crenarchaeota	Nitrososphaeria	Nitrosopumilales	Nitrosopumilaceae	NA	NA
ASV_1364	4.99631	-5.10975	0.249144	-20.5092	1.78e-93	3.85e-91	Archaea	Crenarchaeota	Nitrososphaeria	Nitrosopumilales	Nitrosopumilaceae	NA	NA
ASV_1967	3.99565	-4.70695	0.249445	-18.8697	2.02e-79	3.34e-77	Archaea	Crenarchaeota	Nitrososphaeria	Nitrosopumilales	Nitrosopumilaceae	NA	NA
ASV_1900	3.99565	-4.70695	0.251786	-18.6943	5.51e-78	8.7e-76	Archaea	Crenarchaeota	Nitrososphaeria	Nitrosopumilales	Nitrosopumilaceae	NA	NA
ASV_1613	3.98165	-4.70044	0.246758	-19.0488	6.73e-81	1.2e-78	Archaea	Crenarchaeota	Nitrososphaeria	Nitrosopumilales	Nitrosopumilaceae	NA	NA
ASV_887	3.79971	-4.61298	0.33428	-13.7997	2.56e-43	1.81e-41	Archaea	Crenarchaeota	Nitrososphaeria	Nitrosopumilales	Nitrosopumilaceae	NA	NA
ASV_1250	3.62477	-4.52356	0.304368	-14.8622	5.8e-50	4.91e-48	Archaea	Crenarchaeota	Nitrososphaeria	Nitrosopumilales	Nitrosopumilaceae	NA	NA
ASV_2438	3.18392	-4.27009	0.251802	-16.9581	1.68e-64	1.99e-62	Archaea	Crenarchaeota	Nitrososphaeria	Nitrosopumilales	Nitrosopumilaceae	NA	NA
ASV_1936	3.21891	-4.25783	0.263288	-16.1718	7.98e-59	8.42e-57	Archaea	Crenarchaeota	Nitrososphaeria	Nitrosopumilales	Nitrosopumilaceae	NA	NA
ASV_2321	2.93201	-4.10236	0.278164	-14.748	3.17e-49	2.56e-47	Archaea	Crenarchaeota	Nitrososphaeria	Nitrosopumilales	Nitrosopumilaceae	NA	NA
ASV_2864	2.91101	-4.08746	0.252279	-16.2021	4.87e-59	5.17e-57	Archaea	Crenarchaeota	Nitrososphaeria	Nitrosopumilales	Nitrosopumilaceae	NA	NA
ASV_374	2.49815	-3.75803	0.351802	-10.6822	1.23e-26	4.76e-25	Archaea	Crenarchaeota	Nitrososphaeria	Nitrosopumilales	Nitrosopumilaceae	NA	NA
ASV_1815	2.49116	-3.75174	0.275629	-13.6115	3.42e-42	2.35e-40	Archaea	Crenarchaeota	Nitrososphaeria	Nitrosopumilales	Nitrosopumilaceae	NA	NA
ASV_1875	2.49116	-3.75174	0.327733	-11.4476	2.42e-30	1.09e-28	Archaea	Crenarchaeota	Nitrososphaeria	Nitrosopumilales	Nitrosopumilaceae	NA	NA
ASV_2300	2.27423	-3.54189	0.303581	-11.667	1.88e-31	8.86e-30	Archaea	Crenarchaeota	Nitrososphaeria	Nitrosopumilales	Nitrosopumilaceae	NA	NA
ASV_2012	1.86137	-3.03148	0.328506	-9.22808	2.76e-20	8e-19	Archaea	Crenarchaeota	Nitrososphaeria	Nitrosopumilales	Nitrosopumilaceae	NA	NA
ASV_2674	1.7564	-2.86673	0.338778	-8.46199	2.63e-17	6.42e-16	Archaea	Crenarchaeota	Nitrososphaeria	Nitrosopumilales	Nitrosopumilaceae	NA	NA
ASV_6130	1.70742	-2.63768	0.274594	-9.60575	7.56e-22	2.33e-20	Archaea	Crenarchaeota	Nitrososphaeria	Nitrosopumilales	Nitrosopumilaceae	NA	NA
ASV_3677	1.60246	-2.58496	0.313451	-8.24677	1.63e-16	3.78e-15	Archaea	Crenarchaeota	Nitrososphaeria	Nitrosopumilales	Nitrosopumilaceae	NA	NA
ASV_3228	1.53948	-2.4517	0.3073	-7.97818	1.49e-15	3.25e-14	Archaea	Crenarchaeota	Nitrososphaeria	Nitrosopumilales	Nitrosopumilaceae	NA	NA
ASV_88	1.53948	-2.4517	0.333253	-7.35686	1.88e-13	3.63e-12	Archaea	Crenarchaeota	Nitrososphaeria	Nitrosopumilales	Nitrosopumilaceae	NA	NA
ASV_6112	1.30856	-1.81943	0.300291	-6.05889	1.37e-09	1.97e-08	Archaea	Crenarchaeota	Nitrososphaeria	Nitrosopumilales	Nitrosopumilaceae	NA	NA
ASV_5879	1.49049	-2.3388	0.298581	-7.83306	4.76e-15	1.01e-13	Archaea	Euryarchaeota	Thermococci	Methanofastidiosales	NA	NA	NA
ASV_4738	1.80539	-2.94596	0.284831	-10.3428	4.51e-25	1.65e-23	Archaea	Halobacterota	Halobacteria	Halobacterales	Halomicrobiaceae	NA	NA
ASV_5282	1.62345	-2.61298	0.299251	-8.73173	2.51e-18	6.45e-17	Archaea	Nanoarchaeota	Nanoarchaeia	Woesearchaeales	GW2011_GWC1_47_15	NA	NA
ASV_6206	1.53248	-2.3388	0.300087	-7.79374	6.51e-15	1.37e-13	Archaea	Nanoarchaeota	Nanoarchaeia	Woesearchaeales	GW2011_GWC1_47_15	NA	NA
ASV_3045	1.81239	-2.95693	0.274281	-10.7807	4.25e-27	1.68e-25	Archaea	Nanoarchaeota	Nanoarchaeia	Woesearchaeales	NA	NA	NA
ASV_6626	1.4695	-2.28758	0.283478	-8.06968	7.05e-16	1.57e-14	Archaea	Nanoarchaeota	Nanoarchaeia	Woesearchaeales	NA	NA	NA
ASV_5535	1.34354	-1.9349	0.291918	-6.62826	3.4e-11	5.52e-10	Archaea	Nanoarchaeota	Nanoarchaeia	Woesearchaeales	NA	NA	NA
ASV_7523	1.27357	-1.6939	0.296422	-5.71447	1.1e-08	1.45e-07	Archaea	Nanoarchaeota	Nanoarchaeia	Woesearchaeales	NA	NA	NA
ASV_4678	1.70042	-2.77052	0.300527	-9.21887	3e-20	8.69e-19	Archaea	Nanoarchaeota	Nanoarchaeia	Woesearchaeales	SCGC_AAA011-D5	NA	NA
ASV_4898	1.63744	-2.654	0.292478	-9.0742	1.15e-19	3.21e-18	Archaea	Nanoarchaeota	Nanoarchaeia	Woesearchaeales	SCGC_AAA011-D5	NA	NA
ASV_4535	1.25957	-1.64046	0.300503	-5.45904	4.79e-08	5.93e-07	Archaea	Nanoarchaeota	Nanoarchaeia	Woesearchaeales	SCGC_AAA011-D5	NA	NA
ASV_86	66.2815	-9.1019	0.280702	-32.4255	1.2e-230	1.73e-227	Archaea	Thermoplasmatota	Thermoplasmata	Marine_Group_II	NA	NA	NA
ASV_212	32.8889	-8.07115	0.273415	-29.5198	1.6e-191	1.21e-188	Archaea	Thermoplasmatota	Thermoplasmata	Marine_Group_II	NA	NA	NA
ASV_274	16.7523	-7.05783	0.259472	-27.2007	6.37e-163	3.15e-160	Archaea	Thermoplasmatota	Thermoplasmata	Marine_Group_II	NA	NA	NA
ASV_992	10.1606	-6.28431	0.271328	-23.1613	1.12e-118	3.39e-116	Archaea	Thermoplasmatota	Thermoplasmata	Marine_Group_II	NA	NA	NA
ASV_451	10.1536	-6.28213	0.26447	-23.7537	1.01e-124	3.31e-122	Archaea	Thermoplasmatota	Thermoplasmata	Marine_Group_II	NA	NA	NA
ASV_1855	4.84236	-5.05209	0.267249	-18.904	1.06e-79	1.77e-77	Archaea	Thermoplasmatota	Thermoplasmata	Marine_Group_II	NA	NA	NA
ASV_2784	4.26855	-4.82842	0.302346	-15.9698	2.07e-57	2.09e-55	Archaea	Thermoplasmatota	Thermoplasmata	Marine_Group_II	NA	NA	NA
ASV_2159	4.05163	-4.73272	0.296617	-15.9556	2.6e-57	2.59e-55	Archaea	Thermoplasmatota	Thermoplasmata	Marine_Group_II	NA	NA	NA
ASV_2245	3.59678	-4.50873	0.286086	-15.76	5.86e-56	5.59e-54	Archaea	Thermoplasmatota	Thermoplasmata	Marine_Group_II	NA	NA	NA
ASV_1910	3.44283	-4.42429	0.301728	-14.6632	1.11e-48	8.79e-47	Archaea	Thermoplasmatota	Thermoplasmata	Marine_Group_II	NA	NA	NA
ASV_3697	3.2539	-4.31342	0.317306	-13.5939	4.36e-42	2.97e-40	Archaea	Thermoplasmatota	Thermoplasmata	Marine_Group_II	NA	NA	NA
ASV_4556	2.32321	-3.59202	0.280618	-12.8004	1.63e-37	9.65e-36	Archaea	Thermoplasmatota	Thermoplasmata	Marine_Group_II	NA	NA	NA
ASV_5297	2.0713	-3.31342	0.274431	-12.0738	1.45e-33	7.67e-32	Archaea	Thermoplasmatota	Thermoplasmata	Marine_Group_II	NA	NA	NA
ASV_5958	1.98033	-3.19794	0.277959	-11.5051	1.24e-30	5.74e-29	Archaea	Thermoplasmatota	Thermoplasmata	Marine_Group_II	NA	NA	NA
ASV_6649	1.91035	-3.10236	0.309472	-10.0247	1.19e-23	3.99e-22	Archaea	Thermoplasmatota	Thermoplasmata	Marine_Group_II	NA	NA	NA
ASV_7662	1.58846	-2.55639	0.278477	-9.17991	4.31e-20	1.23e-18	Archaea	Thermoplasmatota	Thermoplasmata	Marine_Group_II	NA	NA	NA
ASV_731	1.4695	-2.28758	0.354072	-6.46077	1.04e-10	1.64e-09	Archaea	Thermoplasmatota	Thermoplasmata	Marine_Group_II	NA	NA	NA
ASV_10541	1.39253	-2.08246	0.287209	-7.2507	4.15e-13	7.75e-12	Archaea	Thermoplasmatota	Thermoplasmata	Marine_Group_II	NA	NA	NA
ASV_6173	1.39253	-2.08246	0.288283	-7.22368	5.06e-13	9.4e-12	Archaea	Thermoplasmatota	Thermoplasmata	Marine_Group_II	NA	NA	NA
ASV_13408	1.25957	-1.64046	0.299575	-5.47596	4.35e-08	5.41e-07	Archaea	Thermoplasmatota	Thermoplasmata	Marine_Group_II	NA	NA	NA
ASV_82	62.1949	-9.00925	0.270066	-33.3594	5.32e-244	9.07e-241	Archaea	Thermoplasmatota	Thermoplasmata	Thermoplasmata_or	Thermoplasmata_fa	Marine_Group_III	NA
ASV_491	14.863	-6.87616	0.247106	-27.8268	2.06e-170	1.21e-167	Archaea	Thermoplasmatota	Thermoplasmata	Thermoplasmata_or	Thermoplasmata_fa	Marine_Group_III	NA
ASV_697	12.4278	-6.59991	0.282273	-23.3813	6.62e-121	2.07e-118	Archaea	Thermoplasmatota	Thermoplasmata	Thermoplasmata_or	Thermoplasmata_fa	Marine_Group_III	NA
ASV_1640	5.80803	-5.36992	0.26774	-20.0564	1.77e-89	3.47e-87	Archaea	Thermoplasmatota	Thermoplasmata	Thermoplasmata_or	Thermoplasmata_fa	Marine_Group_III	NA
ASV_1637	5.33219	-5.22315	0.270158	-19.3337	2.8e-83	5.2e-81	Archaea	Thermoplasmatota	Thermoplasmata	Thermoplasmata_or	Thermoplasmata_fa	Marine_Group_III	NA
ASV_1899	4.98931	-5.10729	0.268843	-18.9973	1.8e-80	3.09e-78	Archaea	Thermoplasmatota	Thermoplasmata	Thermoplasmata_or	Thermoplasmata_fa	Marine_Group_III	NA
ASV_2581	3.44283	-4.42429	0.259382	-17.057	3.1e-65	3.73e-63	Archaea	Thermoplasmatota	Thermoplasmata	Thermoplasmata_or	Thermoplasmata_fa	Marine_Group_III	NA
ASV_3390	3.02298	-4.1652	0.285014	-14.614	2.29e-48	1.8e-46	Archaea	Thermoplasmatota	Thermoplasmata	Thermoplasmata_or	Thermoplasmata_fa	Marine_Group_III	NA
ASV_1722	3.01598	-4.16046	0.322625	-12.8957	4.76e-38	2.89e-36	Archaea	Thermoplasmatota	Thermoplasmata	Thermoplasmata_or	Thermoplasmata_fa	Marine_Group_III	NA
ASV_3163	2.939	-4.10729	0.262751	-15.6319	4.42e-55	4.19e-53	Archaea	Thermoplasmatota	Thermoplasmata	Thermoplasmata_or	Thermoplasmata_fa	Marine_Group_III	NA
ASV_3811	2.57513	-3.82543	0.274713	-13.9252	4.45e-44	3.17e-42	Archaea	Thermoplasmatota	Thermoplasmata	Thermoplasmata_or	Thermoplasmata_fa	Marine_Group_III	NA
ASV_2067	2.46317	-3.72632	0.3348	-11.13	8.97e-29	3.77e-27	Archaea	Thermoplasmatota	Thermoplasmata	Thermoplasmata_or	Thermoplasmata_fa	Marine_Group_III	NA
ASV_457	2.02231	-3.25239	0.353936	-9.18919	3.96e-20	1.13e-18	Archaea	Thermoplasmatota	Thermoplasmata	Thermoplasmata_or	Thermoplasmata_fa	Marine_Group_III	NA
ASV_4856	1.92435	-3.12199	0.284506	-10.9734	5.13e-28	2.11e-26	Archaea	Thermoplasmatota	Thermoplasmata	Thermoplasmata_or	Thermoplasmata_fa	Marine_Group_III	NA
ASV_1996	1.7844	-2.91254	0.318992	-9.13043	6.82e-20	1.94e-18	Archaea	Thermoplasmatota	Thermoplasmata	Thermoplasmata_or	Thermoplasmata_fa	Marine_Group_III	NA
ASV_4469	1.7564	-2.86673	0.321058	-8.92903	4.3e-19	1.16e-17	Archaea	Thermoplasmatota	Thermoplasmata	Thermoplasmata_or	Thermoplasmata_fa	Marine_Group_III	NA
ASV_5347	1.74941	-2.85505	0.30271	-9.43165	4.04e-21	1.22e-19	Archaea	Thermoplasmatota	Thermoplasmata	Thermoplasmata_or	Thermoplasmata_fa	Marine_Group_III	NA
ASV_2879	1.67943	-2.73272	0.292717	-9.3357	1e-20	2.97e-19	Archaea	Thermoplasmatota	Thermoplasmata	Thermoplasmata_or	Thermoplasmata_fa	Marine_Group_III	NA
ASV_3517	1.65144	-2.68072	0.344206	-7.78814	6.8e-15	1.43e-13	Archaea	Thermoplasmatota	Thermoplasmata	Thermoplasmata_or	Thermoplasmata_fa	Marine_Group_III	NA
ASV_5594	1.63744	-2.654	0.30453	-8.71508	2.91e-18	7.45e-17	Archaea	Thermoplasmatota	Thermoplasmata	Thermoplasmata_or	Thermoplasmata_fa	Marine_Group_III	NA
ASV_6940	1.53948	-2.4517	0.293456	-8.35456	6.57e-17	1.57e-15	Archaea	Thermoplasmatota	Thermoplasmata	Thermoplasmata_or	Thermoplasmata_fa	Marine_Group_III	NA
ASV_6600	1.49749	-2.35548	0.284932	-8.26681	1.38e-16	3.22e-15	Archaea	Thermoplasmatota	Thermoplasmata	Thermoplasmata_or	Thermoplasmata_fa	Marine_Group_III	NA
ASV_7326	1.28057	-1.71989	0.30535	-5.63253	1.78e-08	2.3e-07	Archaea	Thermoplasmatota	Thermoplasmata	Thermoplasmata_or	Thermoplasmata_fa	Marine_Group_III	NA
ASV_4600	1.25258	-1.61298	0.306133	-5.26888	1.37e-07	1.63e-06	Archaea	Thermoplasmatota	Thermoplasmata	Thermoplasmata_or	Thermoplasmata_fa	Marine_Group_III	NA
ASV_4376	1.84737	-3.01057	0.27884	-10.7968	3.57e-27	1.41e-25	Bacteria	Acidobacteriota	Acidobacteriae	PAUC26f	NA	NA	NA
ASV_4715	1.28756	-1.74543	0.312485	-5.58563	2.33e-08	2.97e-07	Bacteria	Acidobacteriota	Subgroup_11	NA	NA	NA	NA
ASV_2125	3.81371	-4.11447	0.346839	-11.8628	1.85e-32	9.11e-31	Bacteria	Acidobacteriota	Subgroup_21	NA	NA	NA	NA
ASV_2133	4.1426	-4.10846	0.321841	-12.7655	2.56e-37	1.5e-35	Bacteria	Acidobacteriota	Subgroup_21	NA	NA	NA	NA
ASV_1459	2.86903	-3.90349	0.364759	-10.7016	1e-26	3.91e-25	Bacteria	Acidobacteriota	Subgroup_21	NA	NA	NA	NA
ASV_3213	2.17626	-3.4361	0.300341	-11.4407	2.62e-30	1.18e-28	Bacteria	Acidobacteriota	Subgroup_21	NA	NA	NA	NA
ASV_5221	1.87536	-3.01207	0.308746	-9.75582	1.74e-22	5.54e-21	Bacteria	Acidobacteriota	Subgroup_21	NA	NA	NA	NA
ASV_4185	1.72142	-2.80735	0.310266	-9.04822	1.45e-19	4.04e-18	Bacteria	Acidobacteriota	Subgroup_21	NA	NA	NA	NA
ASV_5964	1.57447	-2.52725	0.296962	-8.51034	1.73e-17	4.27e-16	Bacteria	Acidobacteriota	Subgroup_21	NA	NA	NA	NA
ASV_6006	1.53248	-2.4361	0.319112	-7.634	2.28e-14	4.6e-13	Bacteria	Acidobacteriota	Subgroup_21	NA	NA	NA	NA
ASV_6601	1.39953	-2.10236	0.316158	-6.64971	2.94e-11	4.8e-10	Bacteria	Acidobacteriota	Subgroup_21	NA	NA	NA	NA
ASV_6321	1.31555	-1.84327	0.326073	-5.65296	1.58e-08	2.05e-07	Bacteria	Acidobacteriota	Subgroup_21	NA	NA	NA	NA
ASV_3096	2.70108	-3.92935	0.264524	-14.8544	6.51e-50	5.46e-48	Bacteria	Acidobacteriota	Subgroup_26	NA	NA	NA	NA
ASV_2098	3.96766	-3.32193	0.386426	-8.59655	8.21e-18	2.07e-16	Bacteria	Acidobacteriota	Subgroup_26	NA	NA	NA	NA
ASV_1375	1.83338	-2.98935	0.34123	-8.76052	1.94e-18	5.03e-17	Bacteria	Acidobacteriota	Subgroup_26	NA	NA	NA	NA
ASV_6305	1.63744	-2.09186	0.307918	-6.79357	1.09e-11	1.84e-10	Bacteria	Acidobacteriota	Subgroup_26	NA	NA	NA	NA
ASV_3046	2.56813	-1.97903	0.335532	-5.8982	3.67e-09	5.06e-08	Bacteria	Acidobacteriota	Subgroup_5	NA	NA	NA	NA
ASV_3736	2.6521	-1.63243	0.391308	-4.17172	3.02e-05	0.00026788	Bacteria	Acidobacteriota	Subgroup_5	NA	NA	NA	NA
ASV_2256	3.87669	-4.65063	0.271922	-17.1028	1.41e-65	1.72e-63	Bacteria	Acidobacteriota	Thermoanaerobaculia	Thermoanaerobaculales	Thermoanaerobaculaceae	Subgroup_10	NA
ASV_1341	3.66676	-3.63798	0.334776	-10.8669	1.66e-27	6.65e-26	Bacteria	Acidobacteriota	Thermoanaerobaculia	Thermoanaerobaculales	Thermoanaerobaculaceae	Subgroup_10	NA
ASV_4531	2.14827	-3.40439	0.268834	-12.6635	9.42e-37	5.39e-35	Bacteria	Acidobacteriota	Thermoanaerobaculia	Thermoanaerobaculales	Thermoanaerobaculaceae	Subgroup_10	NA
ASV_3854	1.88936	-2.94402	0.277847	-10.5958	3.12e-26	1.19e-24	Bacteria	Acidobacteriota	Vicinamibacteria	Subgroup_9	NA	NA	NA
ASV_494	9.59375	-5.51012	0.358777	-15.3581	3.13e-53	2.88e-51	Bacteria	Acidobacteriota	Vicinamibacteria	Vicinamibacterales	NA	NA	NA
ASV_898	4.53446	-4.93768	0.329461	-14.9871	8.91e-51	7.71e-49	Bacteria	Acidobacteriota	Vicinamibacteria	Vicinamibacterales	NA	NA	NA
ASV_1219	4.18458	-4.79212	0.278053	-17.2345	1.46e-66	1.87e-64	Bacteria	Acidobacteriota	Vicinamibacteria	Vicinamibacterales	NA	NA	NA
ASV_1807	3.99565	-4.70695	0.292399	-16.0977	2.65e-58	2.75e-56	Bacteria	Acidobacteriota	Vicinamibacteria	Vicinamibacterales	NA	NA	NA
ASV_1517	2.02231	-3.25239	0.316554	-10.2743	9.2e-25	3.36e-23	Bacteria	Acidobacteriota	Vicinamibacteria	Vicinamibacterales	NA	NA	NA
ASV_5202	1.7774	-2.90122	0.2995	-9.68688	3.43e-22	1.07e-20	Bacteria	Acidobacteriota	Vicinamibacteria	Vicinamibacterales	NA	NA	NA
ASV_4825	1.67943	-2.73272	0.303278	-9.0106	2.05e-19	5.66e-18	Bacteria	Acidobacteriota	Vicinamibacteria	Vicinamibacterales	NA	NA	NA
ASV_5628	1.66544	-2.70695	0.300456	-9.00947	2.07e-19	5.71e-18	Bacteria	Acidobacteriota	Vicinamibacteria	Vicinamibacterales	NA	NA	NA
ASV_6110	1.65144	-2.68072	0.274056	-9.78166	1.35e-22	4.32e-21	Bacteria	Acidobacteriota	Vicinamibacteria	Vicinamibacterales	NA	NA	NA
ASV_5399	1.70742	-2.66742	0.298525	-8.93534	4.06e-19	1.1e-17	Bacteria	Acidobacteriota	Vicinamibacteria	Vicinamibacterales	NA	NA	NA
ASV_1533	5.56311	-2.42088	0.360773	-6.71026	1.94e-11	3.21e-10	Bacteria	Acidobacteriota	Vicinamibacteria	Vicinamibacterales	NA	NA	NA
ASV_5562	1.51149	-2.38827	0.285364	-8.36921	5.8e-17	1.39e-15	Bacteria	Acidobacteriota	Vicinamibacteria	Vicinamibacterales	NA	NA	NA
ASV_6227	1.49049	-2.3388	0.290295	-8.05665	7.84e-16	1.74e-14	Bacteria	Acidobacteriota	Vicinamibacteria	Vicinamibacterales	NA	NA	NA
ASV_1436	4.7304	-2.23763	0.266766	-8.38801	4.94e-17	1.19e-15	Bacteria	Acidobacteriota	Vicinamibacteria	Vicinamibacterales	NA	NA	NA
ASV_7950	1.40652	-2.04182	0.294855	-6.92484	4.36e-12	7.55e-11	Bacteria	Acidobacteriota	Vicinamibacteria	Vicinamibacterales	NA	NA	NA
ASV_5744	1.33655	-1.91254	0.319091	-5.9937	2.05e-09	2.9e-08	Bacteria	Acidobacteriota	Vicinamibacteria	Vicinamibacterales	NA	NA	NA
ASV_7100	1.32255	-1.86673	0.29737	-6.27748	3.44e-10	5.2e-09	Bacteria	Acidobacteriota	Vicinamibacteria	Vicinamibacterales	NA	NA	NA
ASV_3698	1.98033	-3.19794	0.274065	-11.6686	1.85e-31	8.73e-30	Bacteria	Acidobacteriota	Vicinamibacteria	Vicinamibacterales	Vicinamibacteraceae	NA	NA
ASV_3828	1.69343	-2.75803	0.281998	-9.7803	1.37e-22	4.37e-21	Bacteria	Acidobacteriota	Vicinamibacteria	Vicinamibacterales	Vicinamibacteraceae	NA	NA
ASV_2396	3.74373	-1.84415	0.36494	-5.0533	4.34e-07	4.89e-06	Bacteria	Acidobacteriota	Vicinamibacteria	Vicinamibacterales	Vicinamibacteraceae	NA	NA
ASV_255	32.2801	-8.04375	0.399412	-20.139	3.36e-90	6.71e-88	Bacteria	Actinobacteriota	Acidimicrobiia	Microtrichales	Microtrichaceae	Sva0996_marine_group	NA
ASV_361	23.519	-7.57164	0.339046	-22.3322	1.8e-110	5.12e-108	Bacteria	Actinobacteriota	Acidimicrobiia	Microtrichales	Microtrichaceae	Sva0996_marine_group	NA
ASV_7025	1.28057	-1.71989	0.320816	-5.36099	8.28e-08	1e-06	Bacteria	Actinobacteriota	Acidimicrobiia	Microtrichales	Microtrichaceae	Sva0996_marine_group	NA
ASV_2194	5.83602	-5.3781	0.407384	-13.2016	8.59e-40	5.62e-38	Bacteria	Actinobacteriota	Actinobacteria	Corynebacteriales	Nocardiaceae	Rhodococcus	NA
ASV_3075	4.08661	-4.74859	0.356353	-13.3255	1.65e-40	1.1e-38	Bacteria	Actinobacteriota	Actinobacteria	Propionibacteriales	Nocardioidaceae	Nocardioides	salarius
ASV_6404	1.61645	-2.61298	0.359897	-7.26034	3.86e-13	7.26e-12	Bacteria	Actinobacteriota	Actinobacteria	Propionibacteriales	Nocardioidaceae	Nocardioides	NA
ASV_447	13.8343	-6.69913	0.253808	-26.3945	1.59e-153	6.77e-151	Bacteria	AncK6	NA	NA	NA	NA	NA
ASV_11955	1.33655	-1.60059	0.299682	-5.34098	9.24e-08	1.11e-06	Bacteria	Bacteroidota	Bacteroidia	Bacteroidales	Prolixibacteraceae	Roseimarinus	NA
ASV_7241	1.67243	-2.71989	0.274557	-9.90646	3.9e-23	1.28e-21	Bacteria	Bacteroidota	Bacteroidia	Chitinophagales	NA	NA	NA
ASV_12206	1.31555	-1.84327	0.29572	-6.23318	4.57e-10	6.84e-09	Bacteria	Bacteroidota	Bacteroidia	Chitinophagales	NA	NA	NA
ASV_8407	1.40652	-2.12199	0.299716	-7.08	1.44e-12	2.57e-11	Bacteria	Bacteroidota	Bacteroidia	Chitinophagales	Saprospiraceae	Aureispira	NA
ASV_7363	1.83338	-2.98935	0.347728	-8.59682	8.2e-18	2.07e-16	Bacteria	Bacteroidota	Bacteroidia	Cytophagales	Cyclobacteriaceae	Fabibacter	NA
ASV_687	11.1962	-6.4361	0.269379	-23.8924	3.68e-126	1.26e-123	Bacteria	Bacteroidota	Bacteroidia	Cytophagales	Cyclobacteriaceae	Marinoscillum	NA
ASV_9598	1.44851	-1.83007	0.300902	-6.08197	1.19e-09	1.72e-08	Bacteria	Bacteroidota	Bacteroidia	Cytophagales	Cyclobacteriaceae	NA	NA
ASV_5726	2.26023	-3.52725	0.35273	-9.99985	1.53e-23	5.09e-22	Bacteria	Bacteroidota	Bacteroidia	Flavobacteriales	Crocinitomicaceae	Brumimicrobium	NA
ASV_4146	3.07196	-4.14136	0.366754	-11.2919	1.44e-29	6.31e-28	Bacteria	Bacteroidota	Bacteroidia	Flavobacteriales	Crocinitomicaceae	Crocinitomix	NA
ASV_9322	1.44151	-2.21632	0.286913	-7.7247	1.12e-14	2.32e-13	Bacteria	Bacteroidota	Bacteroidia	Flavobacteriales	Crocinitomicaceae	Fluviicola	NA
ASV_426	24.9605	-7.66073	0.339514	-22.5638	9.83e-113	2.84e-110	Bacteria	Bacteroidota	Bacteroidia	Flavobacteriales	Cryomorphaceae	NA	NA
ASV_1990	6.1859	-5.47669	0.337437	-16.2303	3.08e-59	3.29e-57	Bacteria	Bacteroidota	Bacteroidia	Flavobacteriales	Cryomorphaceae	NA	NA
ASV_9652	1.51149	-2.38827	0.341272	-6.99815	2.59e-12	4.56e-11	Bacteria	Bacteroidota	Bacteroidia	Flavobacteriales	Cryomorphaceae	NA	NA
ASV_4205	3.03697	-4.17463	0.366327	-11.3959	4.38e-30	1.96e-28	Bacteria	Bacteroidota	Bacteroidia	Flavobacteriales	Cryomorphaceae	Owenweeksia	NA
ASV_5232	1.95934	-3.16992	0.368388	-8.60486	7.64e-18	1.93e-16	Bacteria	Bacteroidota	Bacteroidia	Flavobacteriales	Cryomorphaceae	Owenweeksia	NA
ASV_1587	7.04661	-5.30153	0.358275	-14.7974	1.52e-49	1.25e-47	Bacteria	Bacteroidota	Bacteroidia	Flavobacteriales	Cryomorphaceae	Vicingus	NA
ASV_5235	2.44917	-3.66073	0.356767	-10.2608	1.06e-24	3.83e-23	Bacteria	Bacteroidota	Bacteroidia	Flavobacteriales	Cryomorphaceae	Vicingus	NA
ASV_3720	2.3722	-2.3388	0.41692	-5.60971	2.03e-08	2.6e-07	Bacteria	Bacteroidota	Bacteroidia	Flavobacteriales	Flavobacteriaceae	Aurantivirga	NA
ASV_7940	1.30156	-1.79518	0.311281	-5.76707	8.07e-09	1.08e-07	Bacteria	Bacteroidota	Bacteroidia	Flavobacteriales	Flavobacteriaceae	Croceibacter	atlanticus
ASV_3739	1.26657	-1.61298	0.326613	-4.93849	7.87e-07	8.59e-06	Bacteria	Bacteroidota	Bacteroidia	Flavobacteriales	Flavobacteriaceae	Flavobacterium	NA
ASV_9068	1.57447	-2.52725	0.330021	-7.65783	1.89e-14	3.85e-13	Bacteria	Bacteroidota	Bacteroidia	Flavobacteriales	Flavobacteriaceae	Leeuwenhoekiella	NA
ASV_4231	1.81938	-2.52725	0.359507	-7.02975	2.07e-12	3.65e-11	Bacteria	Bacteroidota	Bacteroidia	Flavobacteriales	Flavobacteriaceae	Lutibacter	NA
ASV_2219	5.77304	-5.35962	0.411434	-13.0267	8.63e-39	5.47e-37	Bacteria	Bacteroidota	Bacteroidia	Flavobacteriales	Flavobacteriaceae	Muricauda	NA
ASV_11703	1.35054	-1.95693	0.32679	-5.98834	2.12e-09	2.99e-08	Bacteria	Bacteroidota	Bacteroidia	Flavobacteriales	Flavobacteriaceae	NA	NA
ASV_12832	1.29456	-1.6939	0.312199	-5.42569	5.77e-08	7.1e-07	Bacteria	Bacteroidota	Bacteroidia	Flavobacteriales	Flavobacteriaceae	NA	NA
ASV_2800	1.81239	-2.95693	0.292795	-10.099	5.58e-24	1.91e-22	Bacteria	Bacteroidota	Bacteroidia	Flavobacteriales	Flavobacteriaceae	NS2b_marine_group	NA
ASV_245	26.2061	-7.67342	0.257987	-29.7434	2.11e-194	1.65e-191	Bacteria	Bacteroidota	Bacteroidia	Flavobacteriales	Flavobacteriaceae	NS5_marine_group	NA
ASV_5812	1.95934	-3.16992	0.300319	-10.5552	4.81e-26	1.82e-24	Bacteria	Bacteroidota	Bacteroidia	Flavobacteriales	Flavobacteriaceae	NS5_marine_group	NA
ASV_6343	2.0783	-3.32193	0.323486	-10.2691	9.71e-25	3.53e-23	Bacteria	Bacteroidota	Bacteroidia	Flavobacteriales	Flavobacteriaceae	Robiginitalea	biformata
ASV_7449	1.69343	-2.75803	0.349529	-7.8907	3e-15	6.45e-14	Bacteria	Bacteroidota	Bacteroidia	Flavobacteriales	Flavobacteriaceae	Salegentibacter	mishustinae
ASV_2425	5.24122	-5.12977	0.377248	-13.5979	4.12e-42	2.83e-40	Bacteria	Bacteroidota	Bacteroidia	Flavobacteriales	Flavobacteriaceae	Ulvibacter	NA
ASV_7810	1.37154	-1.97025	0.337041	-5.84573	5.04e-09	6.88e-08	Bacteria	Bacteroidota	Bacteroidia	Flavobacteriales	Flavobacteriaceae	Winogradskyella	NA
ASV_2722	2.56113	-3.8134	0.304535	-12.522	5.66e-36	3.17e-34	Bacteria	Bacteroidota	Bacteroidia	Flavobacteriales	NA	NA	NA
ASV_306	25.2125	-7.67533	0.292366	-26.2525	6.7e-152	2.79e-149	Bacteria	Bacteroidota	Bacteroidia	Flavobacteriales	NS9_marine_group	NA	NA
ASV_799	13.8483	-6.7674	0.395313	-17.1191	1.07e-65	1.32e-63	Bacteria	Bacteroidota	Bacteroidia	Flavobacteriales	NS9_marine_group	NA	NA
ASV_994	9.50278	-6.17463	0.304651	-20.2679	2.47e-91	5.22e-89	Bacteria	Bacteroidota	Bacteroidia	Flavobacteriales	NS9_marine_group	NA	NA
ASV_2046	5.49314	-5.27448	0.327245	-16.1178	1.91e-58	2.01e-56	Bacteria	Bacteroidota	Bacteroidia	Flavobacteriales	NS9_marine_group	NA	NA
ASV_2057	4.75839	-5.01845	0.312024	-16.0835	3.33e-58	3.43e-56	Bacteria	Bacteroidota	Bacteroidia	Flavobacteriales	NS9_marine_group	NA	NA
ASV_3325	3.66676	-4.54553	0.356337	-12.7563	2.88e-37	1.68e-35	Bacteria	Bacteroidota	Bacteroidia	Flavobacteriales	NS9_marine_group	NA	NA
ASV_3006	3.2539	-4.31342	0.346156	-12.4609	1.22e-35	6.76e-34	Bacteria	Bacteroidota	Bacteroidia	Flavobacteriales	NS9_marine_group	NA	NA
ASV_1508	2.82704	-4.02628	0.310366	-12.9727	1.75e-38	1.11e-36	Bacteria	Bacteroidota	Bacteroidia	Flavobacteriales	NS9_marine_group	NA	NA
ASV_3044	2.70808	-3.9349	0.327091	-12.03	2.47e-33	1.28e-31	Bacteria	Bacteroidota	Bacteroidia	Flavobacteriales	NS9_marine_group	NA	NA
ASV_5180	2.40019	-3.66742	0.343126	-10.6883	1.15e-26	4.49e-25	Bacteria	Bacteroidota	Bacteroidia	Flavobacteriales	NS9_marine_group	NA	NA
ASV_5627	2.31621	-3.58496	0.362721	-9.88352	4.91e-23	1.6e-21	Bacteria	Bacteroidota	Bacteroidia	Flavobacteriales	NS9_marine_group	NA	NA
ASV_2272	2.17626	-3.4361	0.289023	-11.8887	1.36e-32	6.73e-31	Bacteria	Bacteroidota	Bacteroidia	Flavobacteriales	NS9_marine_group	NA	NA
ASV_2005	2.00832	-3.23446	0.343789	-9.40829	5.04e-21	1.51e-19	Bacteria	Bacteroidota	Bacteroidia	Flavobacteriales	NS9_marine_group	NA	NA
ASV_4268	1.91735	-3.11221	0.318695	-9.76548	1.58e-22	5.05e-21	Bacteria	Bacteroidota	Bacteroidia	Flavobacteriales	NS9_marine_group	NA	NA
ASV_5382	1.65144	-2.68072	0.325795	-8.22825	1.9e-16	4.38e-15	Bacteria	Bacteroidota	Bacteroidia	Flavobacteriales	NS9_marine_group	NA	NA
ASV_7448	1.53948	-2.4517	0.292569	-8.37988	5.3e-17	1.28e-15	Bacteria	Bacteroidota	Bacteroidia	Flavobacteriales	NS9_marine_group	NA	NA
ASV_3947	1.43451	-2.19794	0.298506	-7.36312	1.8e-13	3.46e-12	Bacteria	Bacteroidota	Bacteroidia	Flavobacteriales	NS9_marine_group	NA	NA
ASV_3456	1.41352	-1.94681	0.295078	-6.59761	4.18e-11	6.73e-10	Bacteria	Bacteroidota	Bacteroidia	Flavobacteriales	NS9_marine_group	NA	NA
ASV_1155	1.35754	-1.9349	0.290311	-6.66494	2.65e-11	4.34e-10	Bacteria	Bacteroidota	Bacteroidia	Flavobacteriales	NS9_marine_group	NA	NA
ASV_2656	1.93834	-1.98293	0.401174	-4.94281	7.7e-07	8.41e-06	Bacteria	Bacteroidota	Bacteroidia	Sphingobacteriales	KD3-93	NA	NA
ASV_2411	3.17692	-4.26568	0.25929	-16.4514	8.19e-61	9e-59	Bacteria	Bacteroidota	Bacteroidia	Sphingobacteriales	Lentimicrobiaceae	NA	NA
ASV_4750	1.58146	-2.54189	0.296661	-8.56834	1.05e-17	2.63e-16	Bacteria	Bacteroidota	Bacteroidia	Sphingobacteriales	Lentimicrobiaceae	NA	NA
ASV_10793	1.41352	-2.14136	0.330702	-6.47519	9.47e-11	1.49e-09	Bacteria	Bacteroidota	Bacteroidia	Sphingobacteriales	Lentimicrobiaceae	NA	NA
ASV_7551	1.41352	-2.14136	0.29172	-7.34045	2.13e-13	4.09e-12	Bacteria	Bacteroidota	Bacteroidia	Sphingobacteriales	NA	NA	NA
ASV_6189	2.10629	-3.35548	0.340382	-9.85799	6.33e-23	2.05e-21	Bacteria	Bacteroidota	Bacteroidia	Sphingobacteriales	NS11-12_marine_group	NA	NA
ASV_1492	8.43214	-5.98668	0.375711	-15.9343	3.67e-57	3.62e-55	Bacteria	Bacteroidota	Rhodothermia	Balneolales	Balneolaceae	Balneola	alkaliphila
ASV_3066	2.74307	-3.96239	0.389565	-10.1713	2.66e-24	9.31e-23	Bacteria	Bacteroidota	Rhodothermia	Balneolales	Balneolaceae	Gracilimonas	NA
ASV_8745	1.61645	-2.61298	0.334935	-7.80145	6.12e-15	1.29e-13	Bacteria	Bacteroidota	Rhodothermia	Balneolales	Balneolaceae	NA	NA
ASV_2777	2.946	-4.04347	0.262752	-15.3889	1.94e-53	1.82e-51	Bacteria	Bacteroidota	Rhodothermia	Rhodothermales	Rhodothermaceae	NA	NA
ASV_6709	1.61645	-2.61298	0.316959	-8.2439	1.67e-16	3.86e-15	Bacteria	Bacteroidota	Rhodothermia	Rhodothermales	Rhodothermaceae	NA	NA
ASV_9541	1.37853	-2.04182	0.301002	-6.7834	1.17e-11	1.97e-10	Bacteria	Bacteroidota	Rhodothermia	Rhodothermales	Rhodothermaceae	NA	NA
ASV_3613	3.46383	-4.4361	0.367635	-12.0666	1.59e-33	8.34e-32	Bacteria	Bacteroidota	Rhodothermia	Rhodothermales	Rhodothermaceae	Rubrivirga	profundi
ASV_2578	1.35754	-1.97863	0.30804	-6.42327	1.33e-10	2.08e-09	Bacteria	Bacteroidota	Rhodothermia	Rhodothermales	Rhodothermaceae	Rubrivirga	NA
ASV_11736	1.32255	-1.86673	0.296014	-6.30622	2.86e-10	4.36e-09	Bacteria	Bdellovibrionota	Bdellovibrionia	Bacteriovoracales	Bacteriovoracaceae	NA	NA
ASV_5093	2.3722	-3.64046	0.325364	-11.1889	4.62e-29	1.98e-27	Bacteria	Bdellovibrionota	Bdellovibrionia	Bdellovibrionales	Bdellovibrionaceae	OM27_clade	NA
ASV_5959	1.7704	-2.88982	0.313533	-9.21694	3.06e-20	8.83e-19	Bacteria	Bdellovibrionota	Bdellovibrionia	Bdellovibrionales	Bdellovibrionaceae	OM27_clade	NA
ASV_8925	1.37154	-2.02106	0.29401	-6.87411	6.24e-12	1.07e-10	Bacteria	Bdellovibrionota	Bdellovibrionia	Bdellovibrionales	Bdellovibrionaceae	OM27_clade	NA
ASV_11623	1.34354	-1.9349	0.2969	-6.51702	7.17e-11	1.14e-09	Bacteria	Bdellovibrionota	Bdellovibrionia	Bdellovibrionales	Bdellovibrionaceae	OM27_clade	NA
ASV_11427	1.34354	-1.9349	0.298352	-6.4853	8.86e-11	1.4e-09	Bacteria	Bdellovibrionota	Bdellovibrionia	Bdellovibrionales	Bdellovibrionaceae	OM27_clade	NA
ASV_11737	1.28756	-1.74543	0.307559	-5.6751	1.39e-08	1.81e-07	Bacteria	Bdellovibrionota	Bdellovibrionia	Bdellovibrionales	Bdellovibrionaceae	OM27_clade	NA
ASV_7304	1.57447	-2.52725	0.284564	-8.88111	6.62e-19	1.78e-17	Bacteria	Chloroflexi	Anaerolineae	Anaerolineales	Anaerolineaceae	NA	NA
ASV_9736	1.50449	-2.37197	0.3111	-7.62445	2.45e-14	4.95e-13	Bacteria	Chloroflexi	Anaerolineae	Caldilineales	Caldilineaceae	NA	NA
ASV_2134	1.28057	-1.71989	0.31738	-5.41904	5.99e-08	7.36e-07	Bacteria	Chloroflexi	Anaerolineae	Caldilineales	Caldilineaceae	NA	NA
ASV_6936	1.55347	-2.48239	0.282932	-8.77383	1.73e-18	4.5e-17	Bacteria	Chloroflexi	Dehalococcoidia	S085	NA	NA	NA
ASV_4479	1.42052	-2.16046	0.295636	-7.30785	2.71e-13	5.16e-12	Bacteria	Chloroflexi	Dehalococcoidia	S085	NA	NA	NA
ASV_585	12.2808	-6.58142	0.241506	-27.2516	1.59e-163	8.3e-161	Bacteria	Chloroflexi	Dehalococcoidia	SAR202_clade	NA	NA	NA
ASV_1484	5.40917	-5.24793	0.250776	-20.9268	3.06e-97	7.17e-95	Bacteria	Chloroflexi	Dehalococcoidia	SAR202_clade	NA	NA	NA
ASV_906	7.39649	-5.19476	0.268685	-19.334	2.78e-83	5.2e-81	Bacteria	Chloroflexi	Dehalococcoidia	SAR202_clade	NA	NA	NA
ASV_1794	4.19858	-4.79823	0.254626	-18.8442	3.28e-79	5.35e-77	Bacteria	Chloroflexi	Dehalococcoidia	SAR202_clade	NA	NA	NA
ASV_61	52.6432	-4.64034	0.291247	-15.9327	3.76e-57	3.69e-55	Bacteria	Chloroflexi	Dehalococcoidia	SAR202_clade	NA	NA	NA
ASV_3135	3.44983	-4.42824	0.358766	-12.343	5.32e-35	2.89e-33	Bacteria	Chloroflexi	Dehalococcoidia	SAR202_clade	NA	NA	NA
ASV_1541	2.97399	-4.13171	0.359257	-11.5007	1.31e-30	6.02e-29	Bacteria	Chloroflexi	Dehalococcoidia	SAR202_clade	NA	NA	NA
ASV_3021	2.76406	-3.97863	0.348014	-11.4324	2.88e-30	1.29e-28	Bacteria	Chloroflexi	Dehalococcoidia	SAR202_clade	NA	NA	NA
ASV_865	2.58212	-3.8314	0.360243	-10.6356	2.03e-26	7.81e-25	Bacteria	Chloroflexi	Dehalococcoidia	SAR202_clade	NA	NA	NA
ASV_2760	2.47016	-3.73272	0.276014	-13.5237	1.13e-41	7.66e-40	Bacteria	Chloroflexi	Dehalococcoidia	SAR202_clade	NA	NA	NA
ASV_2700	3.62477	-3.66224	0.319621	-11.4581	2.14e-30	9.69e-29	Bacteria	Chloroflexi	Dehalococcoidia	SAR202_clade	NA	NA	NA
ASV_3411	2.37919	-3.64725	0.278063	-13.1166	2.64e-39	1.7e-37	Bacteria	Chloroflexi	Dehalococcoidia	SAR202_clade	NA	NA	NA
ASV_3855	2.3582	-3.62678	0.360135	-10.0706	7.45e-24	2.54e-22	Bacteria	Chloroflexi	Dehalococcoidia	SAR202_clade	NA	NA	NA
ASV_2530	2.58212	-3.53113	0.277794	-12.7113	5.12e-37	2.97e-35	Bacteria	Chloroflexi	Dehalococcoidia	SAR202_clade	NA	NA	NA
ASV_466	15.8006	-3.46476	0.473798	-7.31274	2.62e-13	4.99e-12	Bacteria	Chloroflexi	Dehalococcoidia	SAR202_clade	NA	NA	NA
ASV_2183	2.49815	-3.29659	0.337002	-9.78209	1.34e-22	4.31e-21	Bacteria	Chloroflexi	Dehalococcoidia	SAR202_clade	NA	NA	NA
ASV_4112	2.02931	-3.26126	0.292495	-11.1498	7.17e-29	3.03e-27	Bacteria	Chloroflexi	Dehalococcoidia	SAR202_clade	NA	NA	NA
ASV_1699	4.31754	-3.05247	0.324733	-9.39993	5.46e-21	1.63e-19	Bacteria	Chloroflexi	Dehalococcoidia	SAR202_clade	NA	NA	NA
ASV_2041	4.29654	-3.02862	0.339432	-8.92262	4.55e-19	1.23e-17	Bacteria	Chloroflexi	Dehalococcoidia	SAR202_clade	NA	NA	NA
ASV_3863	1.83338	-2.98935	0.33984	-8.79634	1.41e-18	3.7e-17	Bacteria	Chloroflexi	Dehalococcoidia	SAR202_clade	NA	NA	NA
ASV_5654	1.94534	-2.9349	0.316362	-9.27704	1.74e-20	5.1e-19	Bacteria	Chloroflexi	Dehalococcoidia	SAR202_clade	NA	NA	NA
ASV_3336	1.79139	-2.92376	0.322987	-9.05226	1.4e-19	3.91e-18	Bacteria	Chloroflexi	Dehalococcoidia	SAR202_clade	NA	NA	NA
ASV_538	15.1639	-2.86299	0.262804	-10.894	1.23e-27	4.99e-26	Bacteria	Chloroflexi	Dehalococcoidia	SAR202_clade	NA	NA	NA
ASV_5398	1.72142	-2.80735	0.283583	-9.89958	4.18e-23	1.37e-21	Bacteria	Chloroflexi	Dehalococcoidia	SAR202_clade	NA	NA	NA
ASV_4199	1.79139	-2.68072	0.320238	-8.37104	5.71e-17	1.37e-15	Bacteria	Chloroflexi	Dehalococcoidia	SAR202_clade	NA	NA	NA
ASV_4206	1.72841	-2.62678	0.308175	-8.52368	1.55e-17	3.81e-16	Bacteria	Chloroflexi	Dehalococcoidia	SAR202_clade	NA	NA	NA
ASV_5785	1.53948	-2.4517	0.300577	-8.15662	3.45e-16	7.84e-15	Bacteria	Chloroflexi	Dehalococcoidia	SAR202_clade	NA	NA	NA
ASV_6689	1.4695	-2.28758	0.288917	-7.91777	2.42e-15	5.22e-14	Bacteria	Chloroflexi	Dehalococcoidia	SAR202_clade	NA	NA	NA
ASV_4363	1.42052	-2.16046	0.321673	-6.71634	1.86e-11	3.09e-10	Bacteria	Chloroflexi	Dehalococcoidia	SAR202_clade	NA	NA	NA
ASV_7458	1.37154	-2.02106	0.294729	-6.85736	7.01e-12	1.19e-10	Bacteria	Chloroflexi	Dehalococcoidia	SAR202_clade	NA	NA	NA
ASV_5009	2.08529	-1.96565	0.326657	-6.01747	1.77e-09	2.52e-08	Bacteria	Chloroflexi	Dehalococcoidia	SAR202_clade	NA	NA	NA
ASV_140	33.4417	-1.88642	0.246464	-7.65395	1.95e-14	3.96e-13	Bacteria	Chloroflexi	Dehalococcoidia	SAR202_clade	NA	NA	NA
ASV_3923	2.74307	-1.83929	0.378311	-4.86184	1.16e-06	1.24e-05	Bacteria	Chloroflexi	Dehalococcoidia	SAR202_clade	NA	NA	NA
ASV_7736	1.30856	-1.81943	0.292679	-6.21646	5.09e-10	7.55e-09	Bacteria	Chloroflexi	Dehalococcoidia	SAR202_clade	NA	NA	NA
ASV_1718	4.50647	-1.79816	0.433109	-4.15175	3.3e-05	0.00029045	Bacteria	Chloroflexi	Dehalococcoidia	SAR202_clade	NA	NA	NA
ASV_2880	3.19092	-1.77927	0.418685	-4.24966	2.14e-05	0.00019299	Bacteria	Chloroflexi	Dehalococcoidia	SAR202_clade	NA	NA	NA
ASV_8863	1.27357	-1.6939	0.302497	-5.59971	2.15e-08	2.75e-07	Bacteria	Chloroflexi	Dehalococcoidia	SAR202_clade	NA	NA	NA
ASV_5574	1.42052	-2.16046	0.304936	-7.08499	1.39e-12	2.49e-11	Bacteria	Chloroflexi	N9D0	NA	NA	NA	NA
ASV_5573	1.28057	-1.71989	0.298768	-5.7566	8.58e-09	1.15e-07	Bacteria	Chloroflexi	NA	NA	NA	NA	NA
ASV_10	2.93201	-3.84064	0.296696	-12.9447	2.52e-38	1.57e-36	Bacteria	Cyanobacteria	Cyanobacteriia	Synechococcales	Cyanobiaceae	Prochlorococcus_MIT9313	marinus
ASV_25	1.60945	-2.32193	0.332037	-6.99297	2.69e-12	4.72e-11	Bacteria	Cyanobacteria	Cyanobacteriia	Synechococcales	Cyanobiaceae	Prochlorococcus_MIT9313	NA
ASV_53	1.4695	-2.12199	0.297546	-7.13164	9.92e-13	1.8e-11	Bacteria	Cyanobacteria	Cyanobacteriia	Synechococcales	Cyanobiaceae	Prochlorococcus_MIT9313	marinus
ASV_336	1.60945	-1.78508	0.311172	-5.73662	9.66e-09	1.28e-07	Bacteria	Cyanobacteria	Cyanobacteriia	Synechococcales	Cyanobiaceae	Synechococcus_CC9902	NA
ASV_2692	2.72907	-3.95146	0.283703	-13.9281	4.27e-44	3.05e-42	Bacteria	Dadabacteria	Dadabacteriia	Dadabacteriales	NA	NA	NA
ASV_3146	2.3582	-3.62678	0.300695	-12.0613	1.69e-33	8.84e-32	Bacteria	Dadabacteria	Dadabacteriia	Dadabacteriales	NA	NA	NA
ASV_3548	2.19726	-3.45943	0.277446	-12.4688	1.1e-35	6.13e-34	Bacteria	Dadabacteria	Dadabacteriia	Dadabacteriales	NA	NA	NA
ASV_1229	1.84038	-3	0.370619	-8.09456	5.75e-16	1.29e-14	Bacteria	Desulfobacterota	Desulfuromonadia	Bradymonadales	NA	NA	NA
ASV_3970	1.7844	-2.91254	0.321759	-9.05191	1.4e-19	3.91e-18	Bacteria	Desulfobacterota	NA	NA	NA	NA	NA
ASV_8576	1.58846	-2.55639	0.288358	-8.86535	7.63e-19	2.04e-17	Bacteria	Desulfobacterota	NA	NA	NA	NA	NA
ASV_8408	1.39953	-2.10236	0.289346	-7.26591	3.71e-13	6.99e-12	Bacteria	Desulfobacterota	NA	NA	NA	NA	NA
ASV_13086	1.28057	-1.71989	0.309897	-5.54988	2.86e-08	3.6e-07	Bacteria	Firmicutes	Bacilli	Bacillales	Bacillaceae	NA	NA
ASV_4666	1.90335	-3.09245	0.27774	-11.1343	8.54e-29	3.59e-27	Bacteria	Firmicutes	NA	NA	NA	NA	NA
ASV_158	29.3481	-7.87076	0.258786	-30.4142	3.57e-203	3.35e-200	Bacteria	Gemmatimonadota	BD2-11_terrestrial_group	NA	NA	NA	NA
ASV_535	8.05427	-5.91254	0.284703	-20.7674	8.54e-96	1.93e-93	Bacteria	Gemmatimonadota	BD2-11_terrestrial_group	NA	NA	NA	NA
ASV_903	8.92198	-5.67028	0.287945	-19.6922	2.51e-86	4.82e-84	Bacteria	Gemmatimonadota	BD2-11_terrestrial_group	NA	NA	NA	NA
ASV_682	8.76103	-4.69772	0.366485	-12.8183	1.29e-37	7.72e-36	Bacteria	Gemmatimonadota	BD2-11_terrestrial_group	NA	NA	NA	NA
ASV_2198	3.63877	-4.53092	0.269069	-16.8393	1.26e-63	1.46e-61	Bacteria	Gemmatimonadota	BD2-11_terrestrial_group	NA	NA	NA	NA
ASV_1891	1.7704	-2.88982	0.331205	-8.72517	2.66e-18	6.83e-17	Bacteria	Gemmatimonadota	BD2-11_terrestrial_group	NA	NA	NA	NA
ASV_2139	1.67943	-2.73272	0.33714	-8.10558	5.25e-16	1.18e-14	Bacteria	Gemmatimonadota	BD2-11_terrestrial_group	NA	NA	NA	NA
ASV_2251	1.44151	-2.21632	0.317292	-6.9851	2.85e-12	4.98e-11	Bacteria	Gemmatimonadota	BD2-11_terrestrial_group	NA	NA	NA	NA
ASV_10178	1.27357	-1.6939	0.307426	-5.50993	3.59e-08	4.49e-07	Bacteria	Gemmatimonadota	PAUC43f_marine_benthic_group	NA	NA	NA	NA
ASV_1831	4.40851	-4.88695	0.260056	-18.7919	8.8e-79	1.42e-76	Bacteria	Hydrogenedentes	Hydrogenedentia	Hydrogenedentiales	Hydrogenedensaceae	NA	NA
ASV_4218	2.04331	-3.27886	0.310019	-10.5763	3.84e-26	1.46e-24	Bacteria	Hydrogenedentes	Hydrogenedentia	Hydrogenedentiales	Hydrogenedensaceae	NA	NA
ASV_4824	1.49749	-2.28758	0.304594	-7.51025	5.9e-14	1.17e-12	Bacteria	Hydrogenedentes	Hydrogenedentia	Hydrogenedentiales	Hydrogenedensaceae	NA	NA
ASV_52	72.0896	-9.19468	0.254245	-36.1646	2.2e-286	8.24e-283	Bacteria	Marinimicrobia_(SAR406_clade)	NA	NA	NA	NA	NA
ASV_65	48.1647	-8.60453	0.255929	-33.6208	8.33e-248	1.56e-244	Bacteria	Marinimicrobia_(SAR406_clade)	NA	NA	NA	NA	NA
ASV_228	28.6413	-7.83444	0.257993	-30.3669	1.5e-202	1.34e-199	Bacteria	Marinimicrobia_(SAR406_clade)	NA	NA	NA	NA	NA
ASV_130	28.3824	-7.82237	0.24593	-31.8073	5.13e-222	5.67e-219	Bacteria	Marinimicrobia_(SAR406_clade)	NA	NA	NA	NA	NA
ASV_428	16.9413	-7.07556	0.260706	-27.14	3.32e-162	1.56e-159	Bacteria	Marinimicrobia_(SAR406_clade)	NA	NA	NA	NA	NA
ASV_421	16.8363	-7.06609	0.263514	-26.8148	2.17e-158	9.94e-156	Bacteria	Marinimicrobia_(SAR406_clade)	NA	NA	NA	NA	NA
ASV_304	12.4488	-6.60166	0.242366	-27.2384	2.28e-163	1.16e-160	Bacteria	Marinimicrobia_(SAR406_clade)	NA	NA	NA	NA	NA
ASV_651	11.9799	-6.5428	0.249348	-26.2397	9.38e-152	3.83e-149	Bacteria	Marinimicrobia_(SAR406_clade)	NA	NA	NA	NA	NA
ASV_487	12.1479	-6.5038	0.245958	-26.4427	4.42e-154	1.93e-151	Bacteria	Marinimicrobia_(SAR406_clade)	NA	NA	NA	NA	NA
[truncated: 494 more rows]

## Sheet: sediment vs water
Enriched in sediment
	baseMean	log2FoldChange	lfcSE	stat	pvalue	padj	Kingdom	Phylum	Class	Order	Family	Genus	Species
ASV_2370	4.04463	2.69903	0.454979	5.93222	2.98861e-09	4.13004e-08	Archaea	Crenarchaeota	Nitrososphaeria	Marine_Benthic_Group_A	NA	NA	NA
ASV_632	13.7293	4.56658	0.416422	10.9662	5.55292e-28	2.30072e-26	Archaea	Crenarchaeota	Nitrososphaeria	Marine_Benthic_Group_A	NA	NA	NA
ASV_866	10.9653	1.62256	0.238041	6.81632	9.34037e-12	1.60036e-10	Archaea	Crenarchaeota	Nitrososphaeria	NA	NA	NA	NA
ASV_1447	5.906	3.23732	0.417663	7.75103	9.11487e-15	1.93039e-13	Archaea	Crenarchaeota	Nitrososphaeria	NA	NA	NA	NA
ASV_436	9.11791	3.92143	0.602136	6.51253	7.38951e-11	1.17592e-09	Archaea	Crenarchaeota	Nitrososphaeria	NA	NA	NA	NA
ASV_1523	6.64075	1.62696	0.489646	3.32272	0.000891455	0.00604058	Archaea	Crenarchaeota	Nitrososphaeria	Nitrosopumilales	Nitrosopumilaceae	Candidatus_Nitrosopumilus	NA
ASV_532	12.6797	1.70615	0.438129	3.89416	9.85406e-05	0.000793198	Archaea	Crenarchaeota	Nitrososphaeria	Nitrosopumilales	Nitrosopumilaceae	Candidatus_Nitrosopumilus	NA
ASV_504	15.4997	1.71024	0.437287	3.91102	9.19069e-05	0.000741634	Archaea	Crenarchaeota	Nitrososphaeria	Nitrosopumilales	Nitrosopumilaceae	Candidatus_Nitrosopumilus	NA
ASV_1051	4.76538	1.74009	0.537799	3.23558	0.00121395	0.0079676	Archaea	Crenarchaeota	Nitrososphaeria	Nitrosopumilales	Nitrosopumilaceae	Candidatus_Nitrosopumilus	NA
ASV_4393	2.41418	1.74607	0.412382	4.2341	2.29469e-05	0.000202366	Archaea	Crenarchaeota	Nitrososphaeria	Nitrosopumilales	Nitrosopumilaceae	Candidatus_Nitrosopumilus	NA
ASV_1314	7.78836	1.74947	0.412373	4.24243	2.21108e-05	0.000195447	Archaea	Crenarchaeota	Nitrososphaeria	Nitrosopumilales	Nitrosopumilaceae	Candidatus_Nitrosopumilus	NA
ASV_98	55.0993	1.77634	0.260709	6.81348	9.52678e-12	1.62741e-10	Archaea	Crenarchaeota	Nitrososphaeria	Nitrosopumilales	Nitrosopumilaceae	Candidatus_Nitrosopumilus	NA
ASV_1204	7.76737	1.79186	0.552654	3.24227	0.00118581	0.0078046	Archaea	Crenarchaeota	Nitrososphaeria	Nitrosopumilales	Nitrosopumilaceae	Candidatus_Nitrosopumilus	NA
ASV_912	12.0709	1.82034	0.481075	3.7839	0.00015439	0.00120223	Archaea	Crenarchaeota	Nitrososphaeria	Nitrosopumilales	Nitrosopumilaceae	Candidatus_Nitrosopumilus	NA
ASV_1506	6.26288	1.8237	0.470243	3.8782	0.00010523	0.000844958	Archaea	Crenarchaeota	Nitrososphaeria	Nitrosopumilales	Nitrosopumilaceae	Candidatus_Nitrosopumilus	NA
ASV_3243	3.64576	1.83065	0.493853	3.70686	0.000209842	0.00160036	Archaea	Crenarchaeota	Nitrososphaeria	Nitrosopumilales	Nitrosopumilaceae	Candidatus_Nitrosopumilus	NA
ASV_2920	2.70808	1.83293	0.440882	4.1574	3.21883e-05	0.000277844	Archaea	Crenarchaeota	Nitrososphaeria	Nitrosopumilales	Nitrosopumilaceae	Candidatus_Nitrosopumilus	NA
ASV_1826	2.89702	1.83577	0.413288	4.44187	8.91818e-06	8.38743e-05	Archaea	Crenarchaeota	Nitrososphaeria	Nitrosopumilales	Nitrosopumilaceae	Candidatus_Nitrosopumilus	NA
ASV_2091	3.5548	1.84864	0.484965	3.8119	0.000137904	0.00108326	Archaea	Crenarchaeota	Nitrososphaeria	Nitrosopumilales	Nitrosopumilaceae	Candidatus_Nitrosopumilus	NA
ASV_3254	2.54714	1.86614	0.462386	4.0359	5.43926e-05	0.000452537	Archaea	Crenarchaeota	Nitrososphaeria	Nitrosopumilales	Nitrosopumilaceae	Candidatus_Nitrosopumilus	NA
ASV_3910	2.56813	1.89098	0.431445	4.38289	1.17116e-05	0.000107745	Archaea	Crenarchaeota	Nitrososphaeria	Nitrosopumilales	Nitrosopumilaceae	Candidatus_Nitrosopumilus	NA
ASV_2062	3.73673	1.90567	0.551407	3.45602	0.000548224	0.00386539	Archaea	Crenarchaeota	Nitrososphaeria	Nitrosopumilales	Nitrosopumilaceae	Candidatus_Nitrosopumilus	NA
ASV_2497	2.96699	1.93462	0.44038	4.39308	1.11755e-05	0.000103188	Archaea	Crenarchaeota	Nitrososphaeria	Nitrosopumilales	Nitrosopumilaceae	Candidatus_Nitrosopumilus	NA
ASV_2977	4.14959	1.94415	0.527446	3.68597	0.000227837	0.00172605	Archaea	Crenarchaeota	Nitrososphaeria	Nitrosopumilales	Nitrosopumilaceae	Candidatus_Nitrosopumilus	NA
ASV_3485	2.96699	1.95831	0.467891	4.18541	2.84657e-05	0.000247021	Archaea	Crenarchaeota	Nitrososphaeria	Nitrosopumilales	Nitrosopumilaceae	Candidatus_Nitrosopumilus	NA
ASV_2262	2.96	1.99519	0.395524	5.04441	4.54917e-07	4.98157e-06	Archaea	Crenarchaeota	Nitrososphaeria	Nitrosopumilales	Nitrosopumilaceae	Candidatus_Nitrosopumilus	NA
ASV_2240	4.80737	2.00456	0.46379	4.32212	1.54536e-05	0.0001398	Archaea	Crenarchaeota	Nitrososphaeria	Nitrosopumilales	Nitrosopumilaceae	Candidatus_Nitrosopumilus	NA
ASV_1659	2.939	2.0091	0.502062	4.0017	6.28894e-05	0.00052019	Archaea	Crenarchaeota	Nitrososphaeria	Nitrosopumilales	Nitrosopumilaceae	Candidatus_Nitrosopumilus	NA
ASV_1194	7.46647	2.01149	0.564358	3.5642	0.000364963	0.00266052	Archaea	Crenarchaeota	Nitrososphaeria	Nitrosopumilales	Nitrosopumilaceae	Candidatus_Nitrosopumilus	NA
ASV_3290	3.12794	2.04051	0.476358	4.28358	1.83914e-05	0.000164033	Archaea	Crenarchaeota	Nitrososphaeria	Nitrosopumilales	Nitrosopumilaceae	Candidatus_Nitrosopumilus	NA
ASV_3632	2.91101	2.15155	0.445462	4.82992	1.36587e-06	1.41672e-05	Archaea	Crenarchaeota	Nitrososphaeria	Nitrosopumilales	Nitrosopumilaceae	Candidatus_Nitrosopumilus	NA
ASV_2033	5.26222	2.1809	0.373939	5.83223	5.46912e-09	7.35282e-08	Archaea	Crenarchaeota	Nitrososphaeria	Nitrosopumilales	Nitrosopumilaceae	Candidatus_Nitrosopumilus	NA
ASV_3481	3.07196	2.18406	0.417849	5.22691	1.72371e-07	1.97784e-06	Archaea	Crenarchaeota	Nitrososphaeria	Nitrosopumilales	Nitrosopumilaceae	Candidatus_Nitrosopumilus	NA
ASV_1823	3.75073	2.19207	0.569488	3.8492	0.000118505	0.000944224	Archaea	Crenarchaeota	Nitrososphaeria	Nitrosopumilales	Nitrosopumilaceae	Candidatus_Nitrosopumilus	NA
ASV_742	10.6994	2.19931	0.344334	6.38715	1.69e-10	2.60567e-09	Archaea	Crenarchaeota	Nitrososphaeria	Nitrosopumilales	Nitrosopumilaceae	Candidatus_Nitrosopumilus	NA
ASV_1713	3.09995	2.21192	0.459095	4.818	1.45005e-06	1.49858e-05	Archaea	Crenarchaeota	Nitrososphaeria	Nitrosopumilales	Nitrosopumilaceae	Candidatus_Nitrosopumilus	NA
ASV_3331	3.09295	2.21978	0.44472	4.99141	5.99388e-07	6.47032e-06	Archaea	Crenarchaeota	Nitrososphaeria	Nitrosopumilales	Nitrosopumilaceae	Candidatus_Nitrosopumilus	NA
ASV_1338	3.49182	2.2237	0.511819	4.34469	1.3947e-05	0.000127232	Archaea	Crenarchaeota	Nitrososphaeria	Nitrosopumilales	Nitrosopumilaceae	Candidatus_Nitrosopumilus	NA
ASV_2509	3.26089	2.28868	0.510023	4.4874	7.20971e-06	6.87102e-05	Archaea	Crenarchaeota	Nitrososphaeria	Nitrosopumilales	Nitrosopumilaceae	Candidatus_Nitrosopumilus	NA
ASV_1034	3.17692	2.29613	0.445159	5.15801	2.49593e-07	2.81153e-06	Archaea	Crenarchaeota	Nitrososphaeria	Nitrosopumilales	Nitrosopumilaceae	Candidatus_Nitrosopumilus	NA
ASV_968	12.7917	2.31093	0.55716	4.14769	3.35841e-05	0.000289016	Archaea	Crenarchaeota	Nitrososphaeria	Nitrosopumilales	Nitrosopumilaceae	Candidatus_Nitrosopumilus	NA
ASV_3169	3.38685	2.33646	0.469699	4.97439	6.54543e-07	7.04902e-06	Archaea	Crenarchaeota	Nitrososphaeria	Nitrosopumilales	Nitrosopumilaceae	Candidatus_Nitrosopumilus	NA
ASV_1873	3.64576	2.38854	0.441038	5.41574	6.10362e-08	7.3905e-07	Archaea	Crenarchaeota	Nitrososphaeria	Nitrosopumilales	Nitrosopumilaceae	Candidatus_Nitrosopumilus	NA
ASV_1705	4.51347	2.4072	0.442769	5.43669	5.42805e-08	6.61114e-07	Archaea	Crenarchaeota	Nitrososphaeria	Nitrosopumilales	Nitrosopumilaceae	Candidatus_Nitrosopumilus	NA
ASV_1971	3.8347	2.4139	0.467888	5.15913	2.48095e-07	2.7988e-06	Archaea	Crenarchaeota	Nitrososphaeria	Nitrosopumilales	Nitrosopumilaceae	Candidatus_Nitrosopumilus	NA
ASV_1963	4.86335	2.41732	0.481753	5.01776	5.22782e-07	5.68918e-06	Archaea	Crenarchaeota	Nitrososphaeria	Nitrosopumilales	Nitrosopumilaceae	Candidatus_Nitrosopumilus	NA
ASV_78	50.8937	2.41783	0.237546	10.1784	2.47681e-24	8.75061e-23	Archaea	Crenarchaeota	Nitrososphaeria	Nitrosopumilales	Nitrosopumilaceae	Candidatus_Nitrosopumilus	NA
ASV_2026	3.49881	2.44776	0.523635	4.67456	2.9459e-06	2.94177e-05	Archaea	Crenarchaeota	Nitrososphaeria	Nitrosopumilales	Nitrosopumilaceae	Candidatus_Nitrosopumilus	NA
ASV_2055	5.17824	2.45296	0.569087	4.31034	1.63002e-05	0.000146586	Archaea	Crenarchaeota	Nitrososphaeria	Nitrosopumilales	Nitrosopumilaceae	Candidatus_Nitrosopumilus	NA
ASV_1838	5.10127	2.474	0.454019	5.44911	5.06226e-08	6.19209e-07	Archaea	Crenarchaeota	Nitrososphaeria	Nitrosopumilales	Nitrosopumilaceae	Candidatus_Nitrosopumilus	NA
ASV_2214	3.64576	2.49064	0.456757	5.45287	4.95629e-08	6.06899e-07	Archaea	Crenarchaeota	Nitrososphaeria	Nitrosopumilales	Nitrosopumilaceae	Candidatus_Nitrosopumilus	NA
ASV_1123	6.38883	2.5025	0.456893	5.47721	4.32082e-08	5.31657e-07	Archaea	Crenarchaeota	Nitrososphaeria	Nitrosopumilales	Nitrosopumilaceae	Candidatus_Nitrosopumilus	NA
ASV_1610	3.65276	2.51	0.445059	5.63971	1.7034e-08	2.19678e-07	Archaea	Crenarchaeota	Nitrososphaeria	Nitrosopumilales	Nitrosopumilaceae	Candidatus_Nitrosopumilus	NA
ASV_1608	5.48614	2.5216	0.50499	4.99336	5.93393e-07	6.41169e-06	Archaea	Crenarchaeota	Nitrososphaeria	Nitrosopumilales	Nitrosopumilaceae	Candidatus_Nitrosopumilus	NA
ASV_1224	7.20756	2.52637	0.476978	5.29663	1.17959e-07	1.38346e-06	Archaea	Crenarchaeota	Nitrososphaeria	Nitrosopumilales	Nitrosopumilaceae	Candidatus_Nitrosopumilus	NA
ASV_2452	4.35952	2.56041	0.465949	5.49503	3.90643e-08	4.82754e-07	Archaea	Crenarchaeota	Nitrososphaeria	Nitrosopumilales	Nitrosopumilaceae	Candidatus_Nitrosopumilus	NA
ASV_1027	3.8487	2.56041	0.483229	5.29853	1.16739e-07	1.37055e-06	Archaea	Crenarchaeota	Nitrososphaeria	Nitrosopumilales	Nitrosopumilaceae	Candidatus_Nitrosopumilus	NA
ASV_2398	4.45749	2.57665	0.511962	5.0329	4.83123e-07	5.28029e-06	Archaea	Crenarchaeota	Nitrososphaeria	Nitrosopumilales	Nitrosopumilaceae	Candidatus_Nitrosopumilus	NA
ASV_383	20.8179	2.63591	0.465354	5.66431	1.47619e-08	1.91569e-07	Archaea	Crenarchaeota	Nitrososphaeria	Nitrosopumilales	Nitrosopumilaceae	Candidatus_Nitrosopumilus	NA
ASV_2140	4.30354	2.64459	0.517426	5.11104	3.20393e-07	3.56499e-06	Archaea	Crenarchaeota	Nitrososphaeria	Nitrosopumilales	Nitrosopumilaceae	Candidatus_Nitrosopumilus	NA
ASV_85	60.4105	2.664	0.247154	10.7787	4.33999e-27	1.73508e-25	Archaea	Crenarchaeota	Nitrososphaeria	Nitrosopumilales	Nitrosopumilaceae	Candidatus_Nitrosopumilus	NA
ASV_1527	4.65342	2.67921	0.481052	5.56949	2.5549e-08	3.22376e-07	Archaea	Crenarchaeota	Nitrososphaeria	Nitrosopumilales	Nitrosopumilaceae	Candidatus_Nitrosopumilus	NA
ASV_2728	4.1216	2.6849	0.47569	5.64423	1.65922e-08	2.14465e-07	Archaea	Crenarchaeota	Nitrososphaeria	Nitrosopumilales	Nitrosopumilaceae	Candidatus_Nitrosopumilus	NA
ASV_1696	6.52879	2.6855	0.515211	5.21243	1.86379e-07	2.13106e-06	Archaea	Crenarchaeota	Nitrososphaeria	Nitrosopumilales	Nitrosopumilaceae	Candidatus_Nitrosopumilus	NA
ASV_2293	4.96132	2.69057	0.526713	5.10823	3.25186e-07	3.61479e-06	Archaea	Crenarchaeota	Nitrososphaeria	Nitrosopumilales	Nitrosopumilaceae	Candidatus_Nitrosopumilus	NA
ASV_1981	4.54846	2.76858	0.495206	5.59075	2.26092e-08	2.8751e-07	Archaea	Crenarchaeota	Nitrososphaeria	Nitrosopumilales	Nitrosopumilaceae	Candidatus_Nitrosopumilus	NA
ASV_1188	5.03829	2.81256	0.449012	6.26389	3.75493e-10	5.6073e-09	Archaea	Crenarchaeota	Nitrososphaeria	Nitrosopumilales	Nitrosopumilaceae	Candidatus_Nitrosopumilus	NA
ASV_1300	9.35583	2.83833	0.594386	4.77523	1.79506e-06	1.83434e-05	Archaea	Crenarchaeota	Nitrososphaeria	Nitrosopumilales	Nitrosopumilaceae	Candidatus_Nitrosopumilus	NA
ASV_2083	4.80037	2.84977	0.483939	5.8887	3.89251e-09	5.31153e-08	Archaea	Crenarchaeota	Nitrososphaeria	Nitrosopumilales	Nitrosopumilaceae	Candidatus_Nitrosopumilus	NA
ASV_1487	6.7737	2.85317	0.463109	6.1609	7.2332e-10	1.05188e-08	Archaea	Crenarchaeota	Nitrososphaeria	Nitrosopumilales	Nitrosopumilaceae	Candidatus_Nitrosopumilus	NA
ASV_1191	7.76037	2.85579	0.447442	6.38247	1.74252e-10	2.68121e-09	Archaea	Crenarchaeota	Nitrososphaeria	Nitrosopumilales	Nitrosopumilaceae	Candidatus_Nitrosopumilus	NA
ASV_2163	5.08728	2.86113	0.493158	5.80164	6.567e-09	8.76677e-08	Archaea	Crenarchaeota	Nitrososphaeria	Nitrosopumilales	Nitrosopumilaceae	Candidatus_Nitrosopumilus	NA
ASV_640	9.67072	2.87114	0.461437	6.22218	4.9028e-10	7.22204e-09	Archaea	Crenarchaeota	Nitrososphaeria	Nitrosopumilales	Nitrosopumilaceae	Candidatus_Nitrosopumilus	NA
ASV_1789	5.45115	2.87613	0.541283	5.31354	1.07516e-07	1.2675e-06	Archaea	Crenarchaeota	Nitrososphaeria	Nitrosopumilales	Nitrosopumilaceae	Candidatus_Nitrosopumilus	NA
ASV_1988	4.77938	2.88357	0.523875	5.50431	3.7062e-08	4.58507e-07	Archaea	Crenarchaeota	Nitrososphaeria	Nitrosopumilales	Nitrosopumilaceae	Candidatus_Nitrosopumilus	NA
ASV_1005	10.6434	2.88604	0.459494	6.28091	3.36597e-10	5.04961e-09	Archaea	Crenarchaeota	Nitrososphaeria	Nitrosopumilales	Nitrosopumilaceae	Candidatus_Nitrosopumilus	NA
ASV_81	70.3751	2.89674	0.484479	5.97909	2.24386e-09	3.13508e-08	Archaea	Crenarchaeota	Nitrososphaeria	Nitrosopumilales	Nitrosopumilaceae	Candidatus_Nitrosopumilus	NA
ASV_803	7.3825	3.00228	0.56596	5.30476	1.12821e-07	1.3266e-06	Archaea	Crenarchaeota	Nitrososphaeria	Nitrosopumilales	Nitrosopumilaceae	Candidatus_Nitrosopumilus	NA
ASV_1625	5.15025	3.01815	0.476964	6.32783	2.48639e-10	3.76728e-09	Archaea	Crenarchaeota	Nitrososphaeria	Nitrosopumilales	Nitrosopumilaceae	Candidatus_Nitrosopumilus	NA
ASV_1719	5.58411	3.03607	0.524367	5.78997	7.04007e-09	9.36539e-08	Archaea	Crenarchaeota	Nitrososphaeria	Nitrosopumilales	Nitrosopumilaceae	Candidatus_Nitrosopumilus	NA
ASV_1024	7.83734	3.06472	0.546721	5.60564	2.07484e-08	2.6518e-07	Archaea	Crenarchaeota	Nitrososphaeria	Nitrosopumilales	Nitrosopumilaceae	Candidatus_Nitrosopumilus	NA
ASV_214	30.9575	3.10404	0.477529	6.50021	8.02092e-11	1.27196e-09	Archaea	Crenarchaeota	Nitrososphaeria	Nitrosopumilales	Nitrosopumilaceae	Candidatus_Nitrosopumilus	NA
ASV_1555	6.38184	3.17218	0.434211	7.30561	2.76017e-13	5.32138e-12	Archaea	Crenarchaeota	Nitrososphaeria	Nitrosopumilales	Nitrosopumilaceae	Candidatus_Nitrosopumilus	NA
ASV_710	13.9323	3.20995	0.569004	5.64134	1.68731e-08	2.17726e-07	Archaea	Crenarchaeota	Nitrososphaeria	Nitrosopumilales	Nitrosopumilaceae	Candidatus_Nitrosopumilus	NA
ASV_1076	10.4964	3.21553	0.470704	6.83132	8.41383e-12	1.44596e-10	Archaea	Crenarchaeota	Nitrososphaeria	Nitrosopumilales	Nitrosopumilaceae	Candidatus_Nitrosopumilus	NA
ASV_309	26.521	3.21902	0.450491	7.14559	8.96091e-13	1.66831e-11	Archaea	Crenarchaeota	Nitrososphaeria	Nitrosopumilales	Nitrosopumilaceae	Candidatus_Nitrosopumilus	NA
ASV_113	47.08	3.2195	0.494574	6.50964	7.53328e-11	1.19796e-09	Archaea	Crenarchaeota	Nitrososphaeria	Nitrosopumilales	Nitrosopumilaceae	Candidatus_Nitrosopumilus	NA
ASV_729	13.2745	3.22512	0.442881	7.28212	3.28607e-13	6.29272e-12	Archaea	Crenarchaeota	Nitrososphaeria	Nitrosopumilales	Nitrosopumilaceae	Candidatus_Nitrosopumilus	NA
ASV_2081	6.15791	3.26797	0.55987	5.83702	5.31434e-09	7.16163e-08	Archaea	Crenarchaeota	Nitrososphaeria	Nitrosopumilales	Nitrosopumilaceae	Candidatus_Nitrosopumilus	NA
ASV_363	24.0998	3.27731	0.472369	6.93803	3.97595e-12	7.05089e-11	Archaea	Crenarchaeota	Nitrososphaeria	Nitrosopumilales	Nitrosopumilaceae	Candidatus_Nitrosopumilus	NA
ASV_952	10.5104	3.32755	0.381876	8.71371	2.941e-18	7.74793e-17	Archaea	Crenarchaeota	Nitrososphaeria	Nitrosopumilales	Nitrosopumilaceae	Candidatus_Nitrosopumilus	NA
ASV_338	23.9739	3.35621	0.523156	6.41532	1.40527e-10	2.17846e-09	Archaea	Crenarchaeota	Nitrososphaeria	Nitrosopumilales	Nitrosopumilaceae	Candidatus_Nitrosopumilus	NA
ASV_1419	7.34751	3.40358	0.499406	6.81525	9.41022e-12	1.60927e-10	Archaea	Crenarchaeota	Nitrososphaeria	Nitrosopumilales	Nitrosopumilaceae	Candidatus_Nitrosopumilus	NA
ASV_846	14.0652	3.44617	0.605077	5.69542	1.23067e-08	1.61176e-07	Archaea	Crenarchaeota	Nitrososphaeria	Nitrosopumilales	Nitrosopumilaceae	Candidatus_Nitrosopumilus	NA
ASV_755	7.75337	3.45453	0.47652	7.2495	4.18311e-13	7.95034e-12	Archaea	Crenarchaeota	Nitrososphaeria	Nitrosopumilales	Nitrosopumilaceae	Candidatus_Nitrosopumilus	NA
ASV_1611	6.7877	3.49064	0.432686	8.06736	7.18329e-16	1.62394e-14	Archaea	Crenarchaeota	Nitrososphaeria	Nitrosopumilales	Nitrosopumilaceae	Candidatus_Nitrosopumilus	NA
ASV_1046	7.03961	3.51	0.475838	7.37646	1.62551e-13	3.19881e-12	Archaea	Crenarchaeota	Nitrososphaeria	Nitrosopumilales	Nitrosopumilaceae	Candidatus_Nitrosopumilus	NA
ASV_1203	8.28519	3.53227	0.518273	6.81546	9.39627e-12	1.60873e-10	Archaea	Crenarchaeota	Nitrososphaeria	Nitrosopumilales	Nitrosopumilaceae	Candidatus_Nitrosopumilus	NA
ASV_1156	8.07526	3.56504	0.56987	6.25588	3.95272e-10	5.88722e-09	Archaea	Crenarchaeota	Nitrososphaeria	Nitrosopumilales	Nitrosopumilaceae	Candidatus_Nitrosopumilus	NA
ASV_194	33.3647	3.56899	0.3452	10.3389	4.69935e-25	1.73283e-23	Archaea	Crenarchaeota	Nitrososphaeria	Nitrosopumilales	Nitrosopumilaceae	Candidatus_Nitrosopumilus	NA
ASV_333	25.0025	3.64322	0.420368	8.66673	4.44693e-18	1.16079e-16	Archaea	Crenarchaeota	Nitrososphaeria	Nitrosopumilales	Nitrosopumilaceae	Candidatus_Nitrosopumilus	NA
ASV_1062	7.69039	3.68774	0.522874	7.05283	1.75318e-12	3.19612e-11	Archaea	Crenarchaeota	Nitrososphaeria	Nitrosopumilales	Nitrosopumilaceae	Candidatus_Nitrosopumilus	NA
ASV_623	13.7993	3.71545	0.426815	8.70505	3.17444e-18	8.35324e-17	Archaea	Crenarchaeota	Nitrososphaeria	Nitrosopumilales	Nitrosopumilaceae	Candidatus_Nitrosopumilus	NA
ASV_810	8.46713	3.80082	0.440207	8.63416	5.91579e-18	1.53366e-16	Archaea	Crenarchaeota	Nitrososphaeria	Nitrosopumilales	Nitrosopumilaceae	Candidatus_Nitrosopumilus	NA
ASV_392	12.9456	3.801	0.570624	6.66112	2.71753e-11	4.48097e-10	Archaea	Crenarchaeota	Nitrososphaeria	Nitrosopumilales	Nitrosopumilaceae	Candidatus_Nitrosopumilus	NA
ASV_771	12.4838	3.92624	0.4998	7.85561	3.97824e-15	8.59299e-14	Archaea	Crenarchaeota	Nitrososphaeria	Nitrosopumilales	Nitrosopumilaceae	Candidatus_Nitrosopumilus	NA
ASV_964	9.90164	3.98854	0.471141	8.4657	2.54624e-17	6.3138e-16	Archaea	Crenarchaeota	Nitrososphaeria	Nitrosopumilales	Nitrosopumilaceae	Candidatus_Nitrosopumilus	NA
ASV_706	15.3318	3.99771	0.513726	7.7818	7.15016e-15	1.51994e-13	Archaea	Crenarchaeota	Nitrososphaeria	Nitrosopumilales	Nitrosopumilaceae	Candidatus_Nitrosopumilus	NA
ASV_764	13.8203	4.0394	0.474199	8.51837	1.61819e-17	4.08364e-16	Archaea	Crenarchaeota	Nitrososphaeria	Nitrosopumilales	Nitrosopumilaceae	Candidatus_Nitrosopumilus	NA
ASV_779	11.693	4.06084	0.464283	8.74648	2.20116e-18	5.85298e-17	Archaea	Crenarchaeota	Nitrososphaeria	Nitrosopumilales	Nitrosopumilaceae	Candidatus_Nitrosopumilus	NA
ASV_464	23.1412	4.07126	0.509766	7.98652	1.38801e-15	3.07985e-14	Archaea	Crenarchaeota	Nitrososphaeria	Nitrosopumilales	Nitrosopumilaceae	Candidatus_Nitrosopumilus	NA
ASV_367	18.6557	4.12914	0.504383	8.18652	2.68886e-16	6.24606e-15	Archaea	Crenarchaeota	Nitrososphaeria	Nitrosopumilales	Nitrosopumilaceae	Candidatus_Nitrosopumilus	NA
ASV_862	11.4971	4.24985	0.586037	7.25184	4.1114e-13	7.82712e-12	Archaea	Crenarchaeota	Nitrososphaeria	Nitrosopumilales	Nitrosopumilaceae	Candidatus_Nitrosopumilus	NA
ASV_1	556.521	4.34676	0.285813	15.2084	3.10922e-52	2.71467e-50	Archaea	Crenarchaeota	Nitrososphaeria	Nitrosopumilales	Nitrosopumilaceae	Candidatus_Nitrosopumilus	NA
ASV_572	12.6657	4.38971	0.503557	8.7174	2.84654e-18	7.50774e-17	Archaea	Crenarchaeota	Nitrososphaeria	Nitrosopumilales	Nitrosopumilaceae	Candidatus_Nitrosopumilus	NA
ASV_565	15.1988	4.45361	0.544553	8.17846	2.8749e-16	6.65785e-15	Archaea	Crenarchaeota	Nitrososphaeria	Nitrosopumilales	Nitrosopumilaceae	Candidatus_Nitrosopumilus	NA
ASV_404	24.4847	4.46551	0.521578	8.56153	1.11379e-17	2.84542e-16	Archaea	Crenarchaeota	Nitrososphaeria	Nitrosopumilales	Nitrosopumilaceae	Candidatus_Nitrosopumilus	NA
ASV_518	19.2855	4.47995	0.509383	8.79486	1.43226e-18	3.84886e-17	Archaea	Crenarchaeota	Nitrososphaeria	Nitrosopumilales	Nitrosopumilaceae	Candidatus_Nitrosopumilus	NA
ASV_133	49.2283	4.49242	0.425084	10.5683	4.17914e-26	1.61414e-24	Archaea	Crenarchaeota	Nitrososphaeria	Nitrosopumilales	Nitrosopumilaceae	Candidatus_Nitrosopumilus	NA
ASV_605	15.3458	4.50035	0.442635	10.1672	2.77806e-24	9.76952e-23	Archaea	Crenarchaeota	Nitrososphaeria	Nitrosopumilales	Nitrosopumilaceae	Candidatus_Nitrosopumilus	NA
ASV_321	23.7919	4.50196	0.668859	6.73081	1.68726e-11	2.82923e-10	Archaea	Crenarchaeota	Nitrososphaeria	Nitrosopumilales	Nitrosopumilaceae	Candidatus_Nitrosopumilus	NA
ASV_558	17.0532	4.52386	0.446629	10.1289	4.11205e-24	1.435e-22	Archaea	Crenarchaeota	Nitrososphaeria	Nitrosopumilales	Nitrosopumilaceae	Candidatus_Nitrosopumilus	NA
ASV_406	18.5367	4.63418	0.472293	9.8121	9.98709e-23	3.27462e-21	Archaea	Crenarchaeota	Nitrososphaeria	Nitrosopumilales	Nitrosopumilaceae	Candidatus_Nitrosopumilus	NA
ASV_283	16.6404	4.81516	0.504704	9.54057	1.42053e-21	4.42833e-20	Archaea	Crenarchaeota	Nitrososphaeria	Nitrosopumilales	Nitrosopumilaceae	Candidatus_Nitrosopumilus	NA
ASV_297	23.582	4.89266	0.369585	13.2382	5.2772e-40	3.36854e-38	Archaea	Crenarchaeota	Nitrososphaeria	Nitrosopumilales	Nitrosopumilaceae	Candidatus_Nitrosopumilus	NA
ASV_164	40.8102	4.91786	0.442872	11.1045	1.19314e-28	5.10116e-27	Archaea	Crenarchaeota	Nitrososphaeria	Nitrosopumilales	Nitrosopumilaceae	Candidatus_Nitrosopumilus	NA
ASV_263	19.2365	5.01363	0.476266	10.5269	6.49036e-26	2.48994e-24	Archaea	Crenarchaeota	Nitrososphaeria	Nitrosopumilales	Nitrosopumilaceae	Candidatus_Nitrosopumilus	NA
ASV_218	33.3857	5.07705	0.551415	9.20731	3.34405e-20	9.79487e-19	Archaea	Crenarchaeota	Nitrososphaeria	Nitrosopumilales	Nitrosopumilaceae	Candidatus_Nitrosopumilus	NA
ASV_201	45.1277	5.12434	0.57599	8.89658	5.75954e-19	1.57561e-17	Archaea	Crenarchaeota	Nitrososphaeria	Nitrosopumilales	Nitrosopumilaceae	Candidatus_Nitrosopumilus	NA
ASV_261	29.467	5.26987	0.438707	12.0123	3.0637e-33	1.59033e-31	Archaea	Crenarchaeota	Nitrososphaeria	Nitrosopumilales	Nitrosopumilaceae	Candidatus_Nitrosopumilus	NA
ASV_182	31.3564	5.29698	0.396211	13.3691	9.16531e-41	6.03639e-39	Archaea	Crenarchaeota	Nitrososphaeria	Nitrosopumilales	Nitrosopumilaceae	Candidatus_Nitrosopumilus	NA
ASV_203	40.1314	5.45387	0.4693	11.6213	3.21289e-31	1.56109e-29	Archaea	Crenarchaeota	Nitrososphaeria	Nitrosopumilales	Nitrosopumilaceae	Candidatus_Nitrosopumilus	NA
ASV_33	129.169	5.85319	0.376859	15.5315	2.1232e-54	1.92763e-52	Archaea	Crenarchaeota	Nitrososphaeria	Nitrosopumilales	Nitrosopumilaceae	Candidatus_Nitrosopumilus	NA
ASV_108	36.0308	5.91387	0.527295	11.2155	3.42259e-29	1.51445e-27	Archaea	Crenarchaeota	Nitrososphaeria	Nitrosopumilales	Nitrosopumilaceae	Candidatus_Nitrosopumilus	NA
ASV_31	89.5556	6.03556	0.389501	15.4956	3.71309e-54	3.34442e-52	Archaea	Crenarchaeota	Nitrososphaeria	Nitrosopumilales	Nitrosopumilaceae	Candidatus_Nitrosopumilus	NA
ASV_162	38.1581	6.05074	0.496764	12.1803	3.95685e-34	2.10674e-32	Archaea	Crenarchaeota	Nitrososphaeria	Nitrosopumilales	Nitrosopumilaceae	Candidatus_Nitrosopumilus	NA
ASV_7	158.293	6.176	0.282443	21.8663	5.43545e-106	1.10592e-103	Archaea	Crenarchaeota	Nitrososphaeria	Nitrosopumilales	Nitrosopumilaceae	Candidatus_Nitrosopumilus	NA
ASV_47	50.5439	6.42626	0.660096	9.73535	2.13093e-22	6.88788e-21	Archaea	Crenarchaeota	Nitrososphaeria	Nitrosopumilales	Nitrosopumilaceae	Candidatus_Nitrosopumilus	NA
ASV_54	73.2512	6.51228	0.48743	13.3605	1.02931e-40	6.72092e-39	Archaea	Crenarchaeota	Nitrososphaeria	Nitrosopumilales	Nitrosopumilaceae	Candidatus_Nitrosopumilus	NA
ASV_3	272.817	6.61708	0.304336	21.7427	8.10522e-105	1.62019e-102	Archaea	Crenarchaeota	Nitrososphaeria	Nitrosopumilales	Nitrosopumilaceae	Candidatus_Nitrosopumilus	NA
ASV_55	82.579	6.76225	0.46855	14.4323	3.24121e-47	2.48689e-45	Archaea	Crenarchaeota	Nitrososphaeria	Nitrosopumilales	Nitrosopumilaceae	Candidatus_Nitrosopumilus	NA
ASV_38	112.025	6.902	0.455977	15.1367	9.26988e-52	7.94143e-50	Archaea	Crenarchaeota	Nitrososphaeria	Nitrosopumilales	Nitrosopumilaceae	Candidatus_Nitrosopumilus	NA
ASV_2	409.095	7.30781	0.287527	25.4161	1.67583e-142	5.53459e-140	Archaea	Crenarchaeota	Nitrososphaeria	Nitrosopumilales	Nitrosopumilaceae	Candidatus_Nitrosopumilus	NA
ASV_4212	2.24624	1.61508	0.436475	3.70029	0.000215356	0.00163912	Archaea	Crenarchaeota	Nitrososphaeria	Nitrosopumilales	Nitrosopumilaceae	NA	NA
ASV_4143	2.19726	1.62103	0.44688	3.62745	0.00028624	0.00212747	Archaea	Crenarchaeota	Nitrososphaeria	Nitrosopumilales	Nitrosopumilaceae	NA	NA
ASV_3608	2.18326	1.62103	0.411728	3.93714	8.24571e-05	0.000669648	Archaea	Crenarchaeota	Nitrososphaeria	Nitrosopumilales	Nitrosopumilaceae	NA	NA
ASV_5227	2.32321	1.63286	0.401567	4.06622	4.77828e-05	0.000400763	Archaea	Crenarchaeota	Nitrososphaeria	Nitrosopumilales	Nitrosopumilaceae	NA	NA
ASV_3610	2.20425	1.65042	0.439792	3.75272	0.000174925	0.00135171	Archaea	Crenarchaeota	Nitrososphaeria	Nitrosopumilales	Nitrosopumilaceae	NA	NA
ASV_2278	2.22525	1.6735	0.470824	3.55441	0.000378833	0.00275458	Archaea	Crenarchaeota	Nitrososphaeria	Nitrosopumilales	Nitrosopumilaceae	NA	NA
ASV_3068	3.98165	1.67921	0.495903	3.38617	0.000708754	0.00487948	Archaea	Crenarchaeota	Nitrososphaeria	Nitrosopumilales	Nitrosopumilaceae	NA	NA
ASV_3554	2.33721	1.69622	0.427412	3.96858	7.23017e-05	0.000594162	Archaea	Crenarchaeota	Nitrososphaeria	Nitrosopumilales	Nitrosopumilaceae	NA	NA
ASV_5642	2.28822	1.69622	0.439363	3.86064	0.000113093	0.000903631	Archaea	Crenarchaeota	Nitrososphaeria	Nitrosopumilales	Nitrosopumilaceae	NA	NA
ASV_2616	2.24624	1.69622	0.440901	3.84717	0.00011949	0.000950417	Archaea	Crenarchaeota	Nitrososphaeria	Nitrosopumilales	Nitrosopumilaceae	NA	NA
ASV_3153	2.30222	1.70184	0.417037	4.0808	4.48815e-05	0.00037796	Archaea	Crenarchaeota	Nitrososphaeria	Nitrosopumilales	Nitrosopumilaceae	NA	NA
ASV_2626	2.67309	1.7275	0.513773	3.36238	0.00077274	0.00528329	Archaea	Crenarchaeota	Nitrososphaeria	Nitrosopumilales	Nitrosopumilaceae	NA	NA
ASV_4530	2.42818	1.78368	0.468428	3.80781	0.000140205	0.00110021	Archaea	Crenarchaeota	Nitrososphaeria	Nitrosopumilales	Nitrosopumilaceae	NA	NA
ASV_995	2.96699	1.8016	0.510764	3.52727	0.000419861	0.00303258	Archaea	Crenarchaeota	Nitrososphaeria	Nitrosopumilales	Nitrosopumilaceae	NA	NA
ASV_3682	2.53314	1.80996	0.470409	3.84764	0.000119263	0.000948943	Archaea	Crenarchaeota	Nitrososphaeria	Nitrosopumilales	Nitrosopumilaceae	NA	NA
ASV_829	14.4571	1.81343	0.538272	3.36898	0.000754458	0.0051707	Archaea	Crenarchaeota	Nitrososphaeria	Nitrosopumilales	Nitrosopumilaceae	NA	NA
ASV_2371	2.6451	1.84258	0.407979	4.51635	6.29138e-06	6.02893e-05	Archaea	Crenarchaeota	Nitrososphaeria	Nitrosopumilales	Nitrosopumilaceae	NA	NA
ASV_3128	2.56813	1.86614	0.462134	4.0381	5.38864e-05	0.000448981	Archaea	Crenarchaeota	Nitrososphaeria	Nitrosopumilales	Nitrosopumilaceae	NA	NA
ASV_3353	2.82704	1.87114	0.405717	4.61195	3.98916e-06	3.91494e-05	Archaea	Crenarchaeota	Nitrososphaeria	Nitrosopumilales	Nitrosopumilaceae	NA	NA
ASV_2967	2.61012	1.90079	0.460745	4.12547	3.69978e-05	0.00031577	Archaea	Crenarchaeota	Nitrososphaeria	Nitrosopumilales	Nitrosopumilaceae	NA	NA
ASV_1020	3.09295	1.90208	0.513657	3.70301	0.000213058	0.00162326	Archaea	Crenarchaeota	Nitrososphaeria	Nitrosopumilales	Nitrosopumilaceae	NA	NA
ASV_3924	3.06496	1.94888	0.449673	4.334	1.46424e-05	0.000132884	Archaea	Crenarchaeota	Nitrososphaeria	Nitrosopumilales	Nitrosopumilaceae	NA	NA
ASV_4155	2.87603	1.98624	0.453056	4.38409	1.16474e-05	0.000107198	Archaea	Crenarchaeota	Nitrososphaeria	Nitrosopumilales	Nitrosopumilaceae	NA	NA
ASV_3210	3.13494	2.0091	0.475193	4.22797	2.35812e-05	0.000207318	Archaea	Crenarchaeota	Nitrososphaeria	Nitrosopumilales	Nitrosopumilaceae	NA	NA
ASV_3002	2.72907	2.0091	0.465479	4.31621	1.58734e-05	0.000143143	Archaea	Crenarchaeota	Nitrososphaeria	Nitrosopumilales	Nitrosopumilaceae	NA	NA
ASV_2405	3.39385	2.01036	0.487246	4.12597	3.69172e-05	0.000315306	Archaea	Crenarchaeota	Nitrososphaeria	Nitrosopumilales	Nitrosopumilaceae	NA	NA
ASV_1668	2.80605	2.01815	0.492543	4.09741	4.17805e-05	0.000353938	Archaea	Crenarchaeota	Nitrososphaeria	Nitrosopumilales	Nitrosopumilaceae	NA	NA
ASV_2731	2.86903	2.02714	0.460471	4.40231	1.07103e-05	9.91334e-05	Archaea	Crenarchaeota	Nitrososphaeria	Nitrosopumilales	Nitrosopumilaceae	NA	NA
ASV_3176	3.16993	2.06691	0.488687	4.22951	2.34201e-05	0.0002063	Archaea	Crenarchaeota	Nitrososphaeria	Nitrosopumilales	Nitrosopumilaceae	NA	NA
ASV_2911	2.85503	2.06691	0.473571	4.36452	1.27405e-05	0.000116786	Archaea	Crenarchaeota	Nitrososphaeria	Nitrosopumilales	Nitrosopumilaceae	NA	NA
ASV_1765	3.02298	2.07992	0.474915	4.37957	1.18914e-05	0.000109223	Archaea	Crenarchaeota	Nitrososphaeria	Nitrosopumilales	Nitrosopumilaceae	NA	NA
ASV_3177	2.91801	2.07992	0.427874	4.86107	1.16754e-06	1.22158e-05	Archaea	Crenarchaeota	Nitrososphaeria	Nitrosopumilales	Nitrosopumilaceae	NA	NA
ASV_3148	2.87603	2.08424	0.51418	4.05352	5.04531e-05	0.000421763	Archaea	Crenarchaeota	Nitrososphaeria	Nitrosopumilales	Nitrosopumilaceae	NA	NA
ASV_3264	3.05796	2.10561	0.427142	4.92953	8.24283e-07	8.75292e-06	Archaea	Crenarchaeota	Nitrososphaeria	Nitrosopumilales	Nitrosopumilaceae	NA	NA
ASV_2373	2.92501	2.14743	0.518627	4.14061	3.4639e-05	0.000297869	Archaea	Crenarchaeota	Nitrososphaeria	Nitrosopumilales	Nitrosopumilaceae	NA	NA
ASV_2201	3.28889	2.19207	0.484265	4.5266	5.99413e-06	5.75618e-05	Archaea	Crenarchaeota	Nitrososphaeria	Nitrosopumilales	Nitrosopumilaceae	NA	NA
ASV_3544	3.26789	2.25846	0.430689	5.24384	1.57273e-07	1.81281e-06	Archaea	Crenarchaeota	Nitrososphaeria	Nitrosopumilales	Nitrosopumilaceae	NA	NA
ASV_2606	3.21891	2.28118	0.482685	4.72602	2.28959e-06	2.31068e-05	Archaea	Crenarchaeota	Nitrososphaeria	Nitrosopumilales	Nitrosopumilaceae	NA	NA
ASV_2188	3.75773	2.28493	0.542164	4.21447	2.50368e-05	0.00021932	Archaea	Crenarchaeota	Nitrososphaeria	Nitrosopumilales	Nitrosopumilaceae	NA	NA
ASV_3160	3.59678	2.29613	0.552675	4.15458	3.25891e-05	0.000280984	Archaea	Crenarchaeota	Nitrososphaeria	Nitrosopumilales	Nitrosopumilaceae	NA	NA
ASV_3928	3.2469	2.29613	0.463111	4.95806	7.12017e-07	7.6391e-06	Archaea	Crenarchaeota	Nitrososphaeria	Nitrosopumilales	Nitrosopumilaceae	NA	NA
ASV_891	3.50581	2.29675	0.517525	4.43795	9.08181e-06	8.53076e-05	Archaea	Crenarchaeota	Nitrososphaeria	Nitrosopumilales	Nitrosopumilaceae	NA	NA
ASV_1162	3.89068	2.39994	0.480015	4.99972	5.74127e-07	6.20853e-06	Archaea	Crenarchaeota	Nitrososphaeria	Nitrosopumilales	Nitrosopumilaceae	NA	NA
ASV_1754	5.57711	2.41534	0.480162	5.03025	4.89835e-07	5.34084e-06	Archaea	Crenarchaeota	Nitrososphaeria	Nitrosopumilales	Nitrosopumilaceae	NA	NA
ASV_2915	3.57579	2.43431	0.478877	5.08338	3.70781e-07	4.09368e-06	Archaea	Crenarchaeota	Nitrososphaeria	Nitrosopumilales	Nitrosopumilaceae	NA	NA
ASV_2248	4.09361	2.46109	0.522858	4.707	2.51391e-06	2.51921e-05	Archaea	Crenarchaeota	Nitrososphaeria	Nitrosopumilales	Nitrosopumilaceae	NA	NA
ASV_3098	3.67375	2.49064	0.476846	5.22315	1.75907e-07	2.01436e-06	Archaea	Crenarchaeota	Nitrososphaeria	Nitrosopumilales	Nitrosopumilaceae	NA	NA
ASV_1552	4.90534	2.49712	0.542267	4.60496	4.12545e-06	4.0348e-05	Archaea	Crenarchaeota	Nitrososphaeria	Nitrosopumilales	Nitrosopumilaceae	NA	NA
ASV_1457	3.62477	2.50357	0.460565	5.43587	5.45289e-08	6.63431e-07	Archaea	Crenarchaeota	Nitrososphaeria	Nitrosopumilales	Nitrosopumilaceae	NA	NA
ASV_1678	6.7877	2.50679	0.54918	4.5646	5.00441e-06	4.85073e-05	Archaea	Crenarchaeota	Nitrososphaeria	Nitrosopumilales	Nitrosopumilaceae	NA	NA
ASV_2610	3.77172	2.50679	0.485166	5.16687	2.38048e-07	2.69079e-06	Archaea	Crenarchaeota	Nitrososphaeria	Nitrosopumilales	Nitrosopumilaceae	NA	NA
ASV_3193	3.97465	2.55039	0.489078	5.2147	1.84116e-07	2.1073e-06	Archaea	Crenarchaeota	Nitrososphaeria	Nitrosopumilales	Nitrosopumilaceae	NA	NA
ASV_2028	3.94666	2.55109	0.498919	5.11323	3.16691e-07	3.52553e-06	Archaea	Crenarchaeota	Nitrososphaeria	Nitrosopumilales	Nitrosopumilaceae	NA	NA
ASV_548	3.8417	2.5758	0.533477	4.82833	1.37681e-06	1.42685e-05	Archaea	Crenarchaeota	Nitrososphaeria	Nitrosopumilales	Nitrosopumilaceae	NA	NA
ASV_2330	4.31054	2.57886	0.538442	4.78949	1.67204e-06	1.71864e-05	Archaea	Crenarchaeota	Nitrososphaeria	Nitrosopumilales	Nitrosopumilaceae	NA	NA
ASV_2586	4.67442	2.59709	0.521139	4.98348	6.24503e-07	6.72869e-06	Archaea	Crenarchaeota	Nitrososphaeria	Nitrosopumilales	Nitrosopumilaceae	NA	NA
ASV_2886	4.37352	2.60311	0.533234	4.88174	1.05152e-06	1.10424e-05	Archaea	Crenarchaeota	Nitrososphaeria	Nitrosopumilales	Nitrosopumilaceae	NA	NA
ASV_1073	3.96766	2.62103	0.510176	5.1375	2.78415e-07	3.11158e-06	Archaea	Crenarchaeota	Nitrososphaeria	Nitrosopumilales	Nitrosopumilaceae	NA	NA
ASV_628	4.09361	2.63873	0.574283	4.59483	4.33102e-06	4.22497e-05	Archaea	Crenarchaeota	Nitrososphaeria	Nitrosopumilales	Nitrosopumilaceae	NA	NA
ASV_914	3.89768	2.63873	0.517962	5.09446	3.49739e-07	3.87827e-06	Archaea	Crenarchaeota	Nitrososphaeria	Nitrosopumilales	Nitrosopumilaceae	NA	NA
ASV_1477	4.4155	2.65622	0.498744	5.32582	1.00499e-07	1.18908e-06	Archaea	Crenarchaeota	Nitrososphaeria	Nitrosopumilales	Nitrosopumilaceae	NA	NA
ASV_1834	4.22657	2.67921	0.481	5.57009	2.54608e-08	3.2144e-07	Archaea	Crenarchaeota	Nitrososphaeria	Nitrosopumilales	Nitrosopumilaceae	NA	NA
ASV_1987	4.87035	2.69057	0.43235	6.22313	4.87319e-10	7.18308e-09	Archaea	Crenarchaeota	Nitrososphaeria	Nitrosopumilales	Nitrosopumilaceae	NA	NA
ASV_551	14.737	2.71303	0.554419	4.89346	9.90789e-07	1.04432e-05	Archaea	Crenarchaeota	Nitrososphaeria	Nitrosopumilales	Nitrosopumilaceae	NA	NA
ASV_938	4.23356	2.72413	0.515031	5.28925	1.22822e-07	1.43532e-06	Archaea	Crenarchaeota	Nitrososphaeria	Nitrosopumilales	Nitrosopumilaceae	NA	NA
ASV_1639	4.60444	2.75842	0.478654	5.76286	8.27012e-09	1.09633e-07	Archaea	Crenarchaeota	Nitrososphaeria	Nitrosopumilales	Nitrosopumilaceae	NA	NA
ASV_1442	6.39583	2.78898	0.499658	5.58177	2.38077e-08	3.01573e-07	Archaea	Crenarchaeota	Nitrososphaeria	Nitrosopumilales	Nitrosopumilaceae	NA	NA
ASV_1512	5.22723	2.81256	0.526038	5.34669	8.95773e-08	1.0665e-06	Archaea	Crenarchaeota	Nitrososphaeria	Nitrosopumilales	Nitrosopumilaceae	NA	NA
ASV_2629	4.38052	2.81516	0.450183	6.25337	4.01679e-10	5.97484e-09	Archaea	Crenarchaeota	Nitrososphaeria	Nitrosopumilales	Nitrosopumilaceae	NA	NA
ASV_1434	5.38118	2.83065	0.466835	6.06348	1.33207e-09	1.89602e-08	Archaea	Crenarchaeota	Nitrososphaeria	Nitrosopumilales	Nitrosopumilaceae	NA	NA
ASV_1118	4.53446	2.83321	0.475197	5.96218	2.48899e-09	3.46694e-08	Archaea	Crenarchaeota	Nitrososphaeria	Nitrosopumilales	Nitrosopumilaceae	NA	NA
ASV_1183	9.78268	2.85357	0.554772	5.14368	2.69414e-07	3.01828e-06	Archaea	Crenarchaeota	Nitrososphaeria	Nitrosopumilales	Nitrosopumilaceae	NA	NA
ASV_1787	4.73739	2.88109	0.466178	6.18024	6.40038e-10	9.34349e-09	Archaea	Crenarchaeota	Nitrososphaeria	Nitrosopumilales	Nitrosopumilaceae	NA	NA
ASV_1399	4.75839	2.89344	0.516835	5.59837	2.16371e-08	2.76227e-07	Archaea	Crenarchaeota	Nitrososphaeria	Nitrosopumilales	Nitrosopumilaceae	NA	NA
ASV_1666	5.36718	2.89685	0.518314	5.58897	2.28418e-08	2.90144e-07	Archaea	Crenarchaeota	Nitrososphaeria	Nitrosopumilales	Nitrosopumilaceae	NA	NA
ASV_1960	4.86335	2.93701	0.415352	7.07114	1.53662e-12	2.81709e-11	Archaea	Crenarchaeota	Nitrososphaeria	Nitrosopumilales	Nitrosopumilaceae	NA	NA
ASV_1684	5.06628	2.94415	0.554921	5.30552	1.12351e-07	1.32244e-06	Archaea	Crenarchaeota	Nitrososphaeria	Nitrosopumilales	Nitrosopumilaceae	NA	NA
ASV_2492	4.97531	2.96301	0.511721	5.79028	7.02688e-09	9.35331e-08	Archaea	Crenarchaeota	Nitrososphaeria	Nitrosopumilales	Nitrosopumilaceae	NA	NA
ASV_1804	5.49314	2.98162	0.461999	6.45374	1.09125e-10	1.71382e-09	Archaea	Crenarchaeota	Nitrososphaeria	Nitrosopumilales	Nitrosopumilaceae	NA	NA
ASV_1342	6.00396	3.02937	0.504382	6.00611	1.90025e-09	2.66807e-08	Archaea	Crenarchaeota	Nitrososphaeria	Nitrosopumilales	Nitrosopumilaceae	NA	NA
ASV_1806	5.06628	3.03607	0.468058	6.48652	8.78429e-11	1.38915e-09	Archaea	Crenarchaeota	Nitrososphaeria	Nitrosopumilales	Nitrosopumilaceae	NA	NA
ASV_1362	5.75905	3.04716	0.515859	5.90696	3.48469e-09	4.78368e-08	Archaea	Crenarchaeota	Nitrososphaeria	Nitrosopumilales	Nitrosopumilaceae	NA	NA
ASV_2361	5.41616	3.05157	0.543014	5.61969	1.91301e-08	2.45183e-07	Archaea	Crenarchaeota	Nitrososphaeria	Nitrosopumilales	Nitrosopumilaceae	NA	NA
ASV_980	10.7763	3.06691	0.573947	5.34354	9.11509e-08	1.08411e-06	Archaea	Crenarchaeota	Nitrososphaeria	Nitrosopumilales	Nitrosopumilaceae	NA	NA
ASV_1452	6.64775	3.06908	0.482435	6.36165	1.99597e-10	3.05879e-09	Archaea	Crenarchaeota	Nitrososphaeria	Nitrosopumilales	Nitrosopumilaceae	NA	NA
ASV_1428	6.58477	3.12447	0.453232	6.89375	5.4339e-12	9.48145e-11	Archaea	Crenarchaeota	Nitrososphaeria	Nitrosopumilales	Nitrosopumilaceae	NA	NA
ASV_378	5.70307	3.13501	0.608462	5.15235	2.57237e-07	2.89192e-06	Archaea	Crenarchaeota	Nitrososphaeria	Nitrosopumilales	Nitrosopumilaceae	NA	NA
ASV_1756	5.78704	3.15155	0.491036	6.41816	1.37928e-10	2.13963e-09	Archaea	Crenarchaeota	Nitrososphaeria	Nitrosopumilales	Nitrosopumilaceae	NA	NA
ASV_1115	5.82902	3.16179	0.53542	5.90525	3.52118e-09	4.83086e-08	Archaea	Crenarchaeota	Nitrososphaeria	Nitrosopumilales	Nitrosopumilaceae	NA	NA
ASV_1601	5.99697	3.176	0.461372	6.88381	5.82718e-12	1.01212e-10	Archaea	Crenarchaeota	Nitrososphaeria	Nitrosopumilales	Nitrosopumilaceae	NA	NA
ASV_1354	6.90666	3.19407	0.543815	5.87346	4.26805e-09	5.7893e-08	Archaea	Crenarchaeota	Nitrososphaeria	Nitrosopumilales	Nitrosopumilaceae	NA	NA
ASV_497	7.02562	3.19806	0.58267	5.48862	4.05081e-08	5.00054e-07	Archaea	Crenarchaeota	Nitrososphaeria	Nitrosopumilales	Nitrosopumilaceae	NA	NA
ASV_1295	5.82203	3.20599	0.498157	6.43572	1.22893e-10	1.9234e-09	Archaea	Crenarchaeota	Nitrososphaeria	Nitrosopumilales	Nitrosopumilaceae	NA	NA
ASV_1265	5.88501	3.21978	0.500686	6.43073	1.2699e-10	1.98617e-09	Archaea	Crenarchaeota	Nitrososphaeria	Nitrosopumilales	Nitrosopumilaceae	NA	NA
ASV_1324	5.82902	3.2276	0.544388	5.92886	3.05048e-09	4.213e-08	Archaea	Crenarchaeota	Nitrososphaeria	Nitrosopumilales	Nitrosopumilaceae	NA	NA
ASV_991	10.6364	3.23344	0.532674	6.07019	1.27756e-09	1.82413e-08	Archaea	Crenarchaeota	Nitrososphaeria	Nitrosopumilales	Nitrosopumilaceae	NA	NA
ASV_1455	7.50146	3.26227	0.509793	6.3992	1.56189e-10	2.41631e-09	Archaea	Crenarchaeota	Nitrososphaeria	Nitrosopumilales	Nitrosopumilaceae	NA	NA
ASV_1675	7.18656	3.27176	0.591197	5.53413	3.12784e-08	3.90346e-07	Archaea	Crenarchaeota	Nitrososphaeria	Nitrosopumilales	Nitrosopumilaceae	NA	NA
ASV_759	6.12292	3.29054	0.507971	6.47782	9.3056e-11	1.46955e-09	Archaea	Crenarchaeota	Nitrososphaeria	Nitrosopumilales	Nitrosopumilaceae	NA	NA
ASV_1745	6.85068	3.30909	0.569706	5.80841	6.30698e-09	8.42953e-08	Archaea	Crenarchaeota	Nitrososphaeria	Nitrosopumilales	Nitrosopumilaceae	NA	NA
ASV_763	9.11091	3.31093	0.620249	5.33806	9.39443e-08	1.11558e-06	Archaea	Crenarchaeota	Nitrososphaeria	Nitrosopumilales	Nitrosopumilaceae	NA	NA
ASV_242	9.55176	3.33827	0.545373	6.12108	9.29445e-10	1.34222e-08	Archaea	Crenarchaeota	Nitrososphaeria	Nitrosopumilales	Nitrosopumilaceae	NA	NA
ASV_1630	6.26288	3.34906	0.390232	8.58224	9.30428e-18	2.38231e-16	Archaea	Crenarchaeota	Nitrososphaeria	Nitrosopumilales	Nitrosopumilaceae	NA	NA
ASV_1922	6.68973	3.39666	0.550863	6.16607	7.00086e-10	1.02005e-08	Archaea	Crenarchaeota	Nitrososphaeria	Nitrosopumilales	Nitrosopumilaceae	NA	NA
ASV_569	13.1625	3.40012	0.504355	6.74153	1.56727e-11	2.63579e-10	Archaea	Crenarchaeota	Nitrososphaeria	Nitrosopumilales	Nitrosopumilaceae	NA	NA
ASV_1139	8.2502	3.4165	0.460749	7.41511	1.2152e-13	2.4101e-12	Archaea	Crenarchaeota	Nitrososphaeria	Nitrosopumilales	Nitrosopumilaceae	NA	NA
ASV_1280	6.68273	3.436	0.515632	6.66366	2.67087e-11	4.40722e-10	Archaea	Crenarchaeota	Nitrososphaeria	Nitrosopumilales	Nitrosopumilaceae	NA	NA
ASV_652	8.35517	3.45014	0.564196	6.11514	9.64698e-10	1.38995e-08	Archaea	Crenarchaeota	Nitrososphaeria	Nitrosopumilales	Nitrosopumilaceae	NA	NA
ASV_521	6.88567	3.45611	0.527289	6.55448	5.58345e-11	8.9729e-10	Archaea	Crenarchaeota	Nitrososphaeria	Nitrosopumilales	Nitrosopumilaceae	NA	NA
ASV_1559	7.83035	3.49388	0.541229	6.45546	1.07893e-10	1.69564e-09	Archaea	Crenarchaeota	Nitrososphaeria	Nitrosopumilales	Nitrosopumilaceae	NA	NA
ASV_1262	7.45947	3.49388	0.447606	7.8057	5.91704e-15	1.26252e-13	Archaea	Crenarchaeota	Nitrososphaeria	Nitrosopumilales	Nitrosopumilaceae	NA	NA
ASV_619	9.19488	3.53385	0.64449	5.48317	4.17773e-08	5.15442e-07	Archaea	Crenarchaeota	Nitrososphaeria	Nitrosopumilales	Nitrosopumilaceae	NA	NA
ASV_1409	7.57143	3.55575	0.448763	7.92346	2.30993e-15	5.05171e-14	Archaea	Crenarchaeota	Nitrososphaeria	Nitrosopumilales	Nitrosopumilaceae	NA	NA
ASV_807	8.38316	3.60952	0.496616	7.26824	3.64193e-13	6.94496e-12	Archaea	Crenarchaeota	Nitrososphaeria	Nitrosopumilales	Nitrosopumilaceae	NA	NA
ASV_1241	7.6694	3.61359	0.506465	7.13493	9.68344e-13	1.79842e-11	Archaea	Crenarchaeota	Nitrososphaeria	Nitrosopumilales	Nitrosopumilaceae	NA	NA
ASV_1158	7.71139	3.61657	0.448363	8.06616	7.25434e-16	1.63837e-14	Archaea	Crenarchaeota	Nitrososphaeria	Nitrosopumilales	Nitrosopumilaceae	NA	NA
ASV_974	7.86533	3.6358	0.489623	7.42572	1.12171e-13	2.23439e-12	Archaea	Crenarchaeota	Nitrososphaeria	Nitrosopumilales	Nitrosopumilaceae	NA	NA
ASV_1294	8.06827	3.67636	0.542938	6.77124	1.27687e-11	2.15855e-10	Archaea	Crenarchaeota	Nitrososphaeria	Nitrosopumilales	Nitrosopumilaceae	NA	NA
ASV_1198	8.02628	3.68916	0.574141	6.42552	1.31417e-10	2.04471e-09	Archaea	Crenarchaeota	Nitrososphaeria	Nitrosopumilales	Nitrosopumilaceae	NA	NA
[truncated: 2,687 more rows]

## Sheet: nodules vs sediment
Enriched in nodules
[truncated: 1,610 more rows]
